# Supplementary material
Source: publisher figshare collection journal article supplement (https://springernature.figshare.com/ndownloader/files/15143120)
Supplement: Supplementary file 1 [file 15143120]

##gff-version 3
##sequence-region   chr10_pilon_pilon 25423 23612530
##sequence-region   chr11_pilon_pilon 15197 19816898
##sequence-region   chr12_pilon_pilon 13438 23484900
##sequence-region   chr13_pilon_pilon 4071 29500005
##sequence-region   chr14_pilon_pilon 5546 29865760
##sequence-region   chr15_pilon_pilon 7330 21838707
##sequence-region   chr16_pilon_pilon 478 23904039
##sequence-region   chr17_pilon_pilon 8702 20874937
##sequence-region   chr18_pilon_pilon 8722 39736495
##sequence-region   chr19_pilon_pilon 7239 25682927
##sequence-region   chr1_pilon_pilon 4075 24152418
##sequence-region   chr2_pilon_pilon 11232 19594951
##sequence-region   chr3_pilon_pilon 26931 20102768
##sequence-region   chr4_pilon_pilon 6449 24719709
##sequence-region   chr5_pilon_pilon 608 24445702
##sequence-region   chr6_pilon_pilon 23745 22949560
##sequence-region   chr7_pilon_pilon 17706 30393715
##sequence-region   chr8_pilon_pilon 6175 22704480
##sequence-region   chr9_pilon_pilon 32305 23716962
##sequence-region   scaffold205_pilon_pilon 272 688748
##sequence-region   scaffold303_pilon_pilon 28736 531206
##sequence-region   scaffold315_pilon_pilon 2517 499931
##sequence-region   scaffold322_pilon_pilon 64680 347339
##sequence-region   scaffold345_pilon_pilon 148 373348
##sequence-region   scaffold349_pilon_pilon 622 433941
##sequence-region   scaffold355_pilon_pilon 20103 421104
##sequence-region   scaffold380_pilon_pilon 363 405811
##sequence-region   scaffold392_pilon_pilon 154 383835
##sequence-region   scaffold393_pilon_pilon 151047 428499
##sequence-region   scaffold401_pilon_pilon 35423 379884
##sequence-region   scaffold418_pilon_pilon 3858 356490
##sequence-region   scaffold437_pilon_pilon 771 325599
##sequence-region   scaffold445_pilon_pilon 3525 27185
##sequence-region   scaffold447_pilon_pilon 20630 315749
##sequence-region   scaffold454_pilon_pilon 19729 299248
##sequence-region   scaffold460_pilon_pilon 5666 299302
##sequence-region   scaffold466_pilon_pilon 1243 304490
##sequence-region   scaffold469_pilon_pilon 126407 295684
##sequence-region   scaffold470_pilon_pilon 119 293501
##sequence-region   scaffold472_pilon_pilon 62952 242898
##sequence-region   scaffold473_pilon_pilon 1077 143202
##sequence-region   scaffold478_pilon_pilon 1157 248161
##sequence-region   scaffold484_pilon_pilon 25282 272651
##sequence-region   scaffold499_pilon_pilon 4110 182397
##sequence-region   scaffold504_pilon_pilon 18615 256300
##sequence-region   scaffold509_pilon_pilon 5865 251166
##sequence-region   scaffold510_pilon_pilon 23123 506394
##sequence-region   scaffold523_pilon_pilon 39195 206092
##sequence-region   scaffold525_pilon_pilon 16160 227215
##sequence-region   scaffold533_pilon_pilon 35681 221295
##sequence-region   scaffold540_pilon_pilon 52 204136
##sequence-region   scaffold541_pilon_pilon 7388 222255
##sequence-region   scaffold544_pilon_pilon 75332 217542
##sequence-region   scaffold548_pilon_pilon 13017 217236
##sequence-region   scaffold560_pilon_pilon 131317 206460
##sequence-region   scaffold566_pilon_pilon 11449 205148
##sequence-region   scaffold567_pilon_pilon 3978 206742
##sequence-region   scaffold573_pilon_pilon 11228 192896
##sequence-region   scaffold583_pilon_pilon 40694 188024
##sequence-region   scaffold586_pilon_pilon 31052 187837
##sequence-region   scaffold593_pilon_pilon 7565 183912
##sequence-region   scaffold600_pilon_pilon 662 162558
##sequence-region   scaffold604_pilon_pilon 23940 179138
##sequence-region   scaffold611_pilon_pilon 1882 155069
##sequence-region   scaffold613_pilon_pilon 52 172780
##sequence-region   scaffold615_pilon_pilon 745 174134
##sequence-region   scaffold618_pilon_pilon 9593 170563
##sequence-region   scaffold622_pilon_pilon 2557 143920
##sequence-region   scaffold623_pilon_pilon 15309 165073
##sequence-region   scaffold626_pilon_pilon 3410 119242
##sequence-region   scaffold627_pilon_pilon 37986 140310
##sequence-region   scaffold628_pilon_pilon 2621 103354
##sequence-region   scaffold629_pilon_pilon 132130 160803
##sequence-region   scaffold634_pilon_pilon 75416 76020
##sequence-region   scaffold639_pilon_pilon 2529 139312
##sequence-region   scaffold640_pilon_pilon 6923 157686
##sequence-region   scaffold641_pilon_pilon 20050 148128
##sequence-region   scaffold644_pilon_pilon 1128 158891
##sequence-region   scaffold647_pilon_pilon 422 153348
##sequence-region   scaffold650_pilon_pilon 7526 158874
##sequence-region   scaffold655_pilon_pilon 2161 157273
##sequence-region   scaffold658_pilon_pilon 18677 107409
##sequence-region   scaffold663_pilon_pilon 29478 144745
##sequence-region   scaffold669_pilon_pilon 1 152673
##sequence-region   scaffold674_pilon_pilon 4942 147357
##sequence-region   scaffold683_pilon_pilon 25348 126908
##sequence-region   scaffold686_pilon_pilon 12885 141875
##sequence-region   scaffold689_pilon_pilon 3236 140569
##sequence-region   scaffold690_pilon_pilon 16148 140516
##sequence-region   scaffold698_pilon_pilon 16069 128058
##sequence-region   scaffold699_pilon_pilon 46281 118317
##sequence-region   scaffold701_pilon_pilon 490 138764
##sequence-region   scaffold702_pilon_pilon 46184 130543
##sequence-region   scaffold707_pilon_pilon 11357 124950
##sequence-region   scaffold709_pilon_pilon 40149 131683
##sequence-region   scaffold712_pilon_pilon 8054 134962
##sequence-region   scaffold713_pilon_pilon 7746 108037
##sequence-region   scaffold714_pilon_pilon 4476 133987
##sequence-region   scaffold715_pilon_pilon 13340 124023
##sequence-region   scaffold716_pilon_pilon 4333 120940
##sequence-region   scaffold717_pilon_pilon 62443 63373
##sequence-region   scaffold718_pilon_pilon 130312 133813
##sequence-region   scaffold720_pilon_pilon 6992 121183
##sequence-region   scaffold722_pilon_pilon 3075 114022
##sequence-region   scaffold725_pilon_pilon 19 125803
##sequence-region   scaffold726_pilon_pilon 489 95690
##sequence-region   scaffold727_pilon_pilon 18 131619
##sequence-region   scaffold730_pilon_pilon 19733 125662
##sequence-region   scaffold731_pilon_pilon 5781 124574
##sequence-region   scaffold732_pilon_pilon 3 124794
##sequence-region   scaffold734_pilon_pilon 30386 106064
##sequence-region   scaffold736_pilon_pilon 20276 125616
##sequence-region   scaffold738_pilon_pilon 46225 58396
##sequence-region   scaffold739_pilon_pilon 9504 121741
##sequence-region   scaffold741_pilon_pilon 20092 97263
##sequence-region   scaffold742_pilon_pilon 20305 110733
##sequence-region   scaffold743_pilon_pilon 1415 98895
##sequence-region   scaffold744_pilon_pilon 5676 123088
##sequence-region   scaffold745_pilon_pilon 25818 118637
##sequence-region   scaffold750_pilon_pilon 867 126426
##sequence-region   scaffold752_pilon_pilon 4724 111261
##sequence-region   scaffold753_pilon_pilon 7032 117796
##sequence-region   scaffold756_pilon_pilon 11127 124966
##sequence-region   scaffold760_pilon_pilon 10343 112232
##sequence-region   scaffold761_pilon_pilon 14638 118838
##sequence-region   scaffold762_pilon_pilon 42821 124167
##sequence-region   scaffold763_pilon_pilon 16426 108855
##sequence-region   scaffold765_pilon_pilon 13103 73526
##sequence-region   scaffold770_pilon_pilon 245 117865
##sequence-region   scaffold774_pilon_pilon 2 118854
##sequence-region   scaffold776_pilon_pilon 4819 109597
##sequence-region   scaffold781_pilon_pilon 9635 114050
##sequence-region   scaffold782_pilon_pilon 1430 101065
##sequence-region   scaffold783_pilon_pilon 5196 108947
##sequence-region   scaffold785_pilon_pilon 955 117560
##sequence-region   scaffold786_pilon_pilon 747 105243
##sequence-region   scaffold787_pilon_pilon 2604 32806
##sequence-region   scaffold788_pilon_pilon 9895 115751
##sequence-region   scaffold791_pilon_pilon 2653 111067
##sequence-region   scaffold793_pilon_pilon 406 115450
##sequence-region   scaffold795_pilon_pilon 6742 113063
##sequence-region   scaffold796_pilon_pilon 3973 114570
##sequence-region   scaffold802_pilon_pilon 6352 113564
##sequence-region   scaffold803_pilon_pilon 35159 110439
##sequence-region   scaffold804_pilon_pilon 12997 107651
##sequence-region   scaffold807_pilon_pilon 5810 111424
##sequence-region   scaffold808_pilon_pilon 8568 104692
##sequence-region   scaffold814_pilon_pilon 1957 106024
##sequence-region   scaffold816_pilon_pilon 1255 104983
##sequence-region   scaffold818_pilon_pilon 4828 105666
##sequence-region   scaffold819_pilon_pilon 30197 106892
##sequence-region   scaffold820_pilon_pilon 2125 108721
##sequence-region   scaffold821_pilon_pilon 33378 105126
##sequence-region   scaffold822_pilon_pilon 2892 84573
##sequence-region   scaffold823_pilon_pilon 557 104073
##sequence-region   scaffold824_pilon_pilon 1518 82838
##sequence-region   scaffold826_pilon_pilon 6120 100136
##sequence-region   scaffold827_pilon_pilon 8289 105647
##sequence-region   scaffold828_pilon_pilon 283 107820
##sequence-region   scaffold835_pilon_pilon 15347 92674
##sequence-region   scaffold837_pilon_pilon 524 106048
##sequence-region   scaffold841_pilon_pilon 3066 101526
##sequence-region   scaffold842_pilon_pilon 3 88014
##sequence-region   scaffold843_pilon_pilon 1163 102676
##sequence-region   scaffold848_pilon_pilon 20181 96599
##sequence-region   scaffold849_pilon_pilon 324 100849
##sequence-region   scaffold852_pilon_pilon 15355 92504
##sequence-region   scaffold855_pilon_pilon 44541 98944
##sequence-region   scaffold856_pilon_pilon 17886 57311
##sequence-region   scaffold861_pilon_pilon 2612 99454
##sequence-region   scaffold866_pilon_pilon 11442 100558
##sequence-region   scaffold868_pilon_pilon 4367 97828
chr10_pilon_pilon	maker	gene	25423	26867	.	-	.	ID=vitri10g00010;Name=vitri10g00010;Note=Protein of unknown function;Dbxref=Pfam:PF08284
chr10_pilon_pilon	maker	mRNA	25423	26867	.	-	.	ID=vitri10g00010-mRNA-1;Parent=vitri10g00010;Name=vitri10g00010-mRNA-1;_AED=0.47;_eAED=0.47;_QI=0|0|0|1|0|0|2|0|65;Note=Protein of unknown function;Dbxref=Pfam:PF08284
chr10_pilon_pilon	maker	exon	25423	25484	.	-	.	ID=vitri10g00010-mRNA-1:exon:22;Parent=vitri10g00010-mRNA-1
chr10_pilon_pilon	maker	CDS	25423	25484	.	-	2	ID=vitri10g00010-mRNA-1:cds;Parent=vitri10g00010-mRNA-1
chr10_pilon_pilon	maker	exon	26732	26867	.	-	.	ID=vitri10g00010-mRNA-1:exon:23;Parent=vitri10g00010-mRNA-1
chr10_pilon_pilon	maker	CDS	26732	26867	.	-	0	ID=vitri10g00010-mRNA-1:cds;Parent=vitri10g00010-mRNA-1
###
chr10_pilon_pilon	maker	gene	26898	28223	.	-	.	ID=vitri10g00020;Name=vitri10g00020;Note=Protein of unknown function;Dbxref=MobiDBLite:mobidb-lite
chr10_pilon_pilon	maker	mRNA	26898	28223	.	-	.	ID=vitri10g00020-mRNA-1;Parent=vitri10g00020;Name=vitri10g00020-mRNA-1;_AED=0.33;_eAED=0.33;_QI=0|0|0|1|0|0|7|0|325;Note=Protein of unknown function;Dbxref=MobiDBLite:mobidb-lite
chr10_pilon_pilon	maker	exon	26898	26953	.	-	.	ID=vitri10g00020-mRNA-1:exon:15;Parent=vitri10g00020-mRNA-1
chr10_pilon_pilon	maker	CDS	26898	26953	.	-	2	ID=vitri10g00020-mRNA-1:cds;Parent=vitri10g00020-mRNA-1
chr10_pilon_pilon	maker	exon	27006	27151	.	-	.	ID=vitri10g00020-mRNA-1:exon:16;Parent=vitri10g00020-mRNA-1
chr10_pilon_pilon	maker	CDS	27006	27151	.	-	1	ID=vitri10g00020-mRNA-1:cds;Parent=vitri10g00020-mRNA-1
chr10_pilon_pilon	maker	exon	27167	27372	.	-	.	ID=vitri10g00020-mRNA-1:exon:17;Parent=vitri10g00020-mRNA-1
chr10_pilon_pilon	maker	CDS	27167	27372	.	-	0	ID=vitri10g00020-mRNA-1:cds;Parent=vitri10g00020-mRNA-1
chr10_pilon_pilon	maker	exon	27415	27747	.	-	.	ID=vitri10g00020-mRNA-1:exon:18;Parent=vitri10g00020-mRNA-1
chr10_pilon_pilon	maker	CDS	27415	27747	.	-	0	ID=vitri10g00020-mRNA-1:cds;Parent=vitri10g00020-mRNA-1
chr10_pilon_pilon	maker	exon	27757	27882	.	-	.	ID=vitri10g00020-mRNA-1:exon:19;Parent=vitri10g00020-mRNA-1
chr10_pilon_pilon	maker	CDS	27757	27882	.	-	0	ID=vitri10g00020-mRNA-1:cds;Parent=vitri10g00020-mRNA-1
chr10_pilon_pilon	maker	exon	28064	28142	.	-	.	ID=vitri10g00020-mRNA-1:exon:20;Parent=vitri10g00020-mRNA-1
chr10_pilon_pilon	maker	CDS	28064	28142	.	-	1	ID=vitri10g00020-mRNA-1:cds;Parent=vitri10g00020-mRNA-1
chr10_pilon_pilon	maker	exon	28192	28223	.	-	.	ID=vitri10g00020-mRNA-1:exon:21;Parent=vitri10g00020-mRNA-1
chr10_pilon_pilon	maker	CDS	28192	28223	.	-	0	ID=vitri10g00020-mRNA-1:cds;Parent=vitri10g00020-mRNA-1
###
chr10_pilon_pilon	maker	gene	39696	43762	.	-	.	ID=vitri10g00030;Name=vitri10g00030;Note=Similar to CRK10: Cysteine-rich receptor-like protein kinase 10 (Arabidopsis thaliana OX%3D3702);Dbxref=CDD:cd14066,Gene3D:G3DSA:1.10.510.10,Gene3D:G3DSA:3.30.200.20,Gene3D:G3DSA:3.30.430.20,InterPro:IPR000719,InterPro:IPR001245,InterPro:IPR002902,InterPro:IPR008271,InterPro:IPR011009,InterPro:IPR017441,InterPro:IPR038408,MobiDBLite:mobidb-lite,PANTHER:PTHR27002,PANTHER:PTHR27002:SF191,Pfam:PF01657,Pfam:PF07714,ProSitePatterns:PS00107,ProSitePatterns:PS00108,ProSiteProfiles:PS50011,ProSiteProfiles:PS51473,SMART:SM00220,SUPERFAMILY:SSF56112,SignalP_EUK:SignalP-noTM;Ontology_term=GO:0004672,GO:0005524,GO:0006468
chr10_pilon_pilon	maker	mRNA	39696	43762	.	-	.	ID=vitri10g00030-mRNA-1;Parent=vitri10g00030;Name=vitri10g00030-mRNA-1;_AED=0.12;_eAED=0.12;_QI=254|0.14|0.25|1|1|1|8|142|668;Note=Similar to CRK10: Cysteine-rich receptor-like protein kinase 10 (Arabidopsis thaliana OX%3D3702);Dbxref=CDD:cd14066,Gene3D:G3DSA:1.10.510.10,Gene3D:G3DSA:3.30.200.20,Gene3D:G3DSA:3.30.430.20,InterPro:IPR000719,InterPro:IPR001245,InterPro:IPR002902,InterPro:IPR008271,InterPro:IPR011009,InterPro:IPR017441,InterPro:IPR038408,MobiDBLite:mobidb-lite,PANTHER:PTHR27002,PANTHER:PTHR27002:SF191,Pfam:PF01657,Pfam:PF07714,ProSitePatterns:PS00107,ProSitePatterns:PS00108,ProSiteProfiles:PS50011,ProSiteProfiles:PS51473,SMART:SM00220,SUPERFAMILY:SSF56112,SignalP_EUK:SignalP-noTM;Ontology_term=GO:0004672,GO:0005524,GO:0006468
chr10_pilon_pilon	maker	three_prime_UTR	39696	39837	.	-	.	ID=vitri10g00030-mRNA-1:three_prime_utr;Parent=vitri10g00030-mRNA-1
chr10_pilon_pilon	maker	exon	39696	40167	.	-	.	ID=vitri10g00030-mRNA-1:exon:9;Parent=vitri10g00030-mRNA-1
chr10_pilon_pilon	maker	CDS	39838	40167	.	-	0	ID=vitri10g00030-mRNA-1:cds;Parent=vitri10g00030-mRNA-1
chr10_pilon_pilon	maker	exon	40295	40445	.	-	.	ID=vitri10g00030-mRNA-1:exon:8;Parent=vitri10g00030-mRNA-1
chr10_pilon_pilon	maker	CDS	40295	40445	.	-	1	ID=vitri10g00030-mRNA-1:cds;Parent=vitri10g00030-mRNA-1
chr10_pilon_pilon	maker	exon	40766	41003	.	-	.	ID=vitri10g00030-mRNA-1:exon:7;Parent=vitri10g00030-mRNA-1
chr10_pilon_pilon	maker	CDS	40766	41003	.	-	2	ID=vitri10g00030-mRNA-1:cds;Parent=vitri10g00030-mRNA-1
chr10_pilon_pilon	maker	exon	41171	41381	.	-	.	ID=vitri10g00030-mRNA-1:exon:6;Parent=vitri10g00030-mRNA-1
chr10_pilon_pilon	maker	CDS	41171	41381	.	-	0	ID=vitri10g00030-mRNA-1:cds;Parent=vitri10g00030-mRNA-1
chr10_pilon_pilon	maker	exon	41481	41602	.	-	.	ID=vitri10g00030-mRNA-1:exon:5;Parent=vitri10g00030-mRNA-1
chr10_pilon_pilon	maker	CDS	41481	41602	.	-	2	ID=vitri10g00030-mRNA-1:cds;Parent=vitri10g00030-mRNA-1
chr10_pilon_pilon	maker	exon	41695	41735	.	-	.	ID=vitri10g00030-mRNA-1:exon:4;Parent=vitri10g00030-mRNA-1
chr10_pilon_pilon	maker	CDS	41695	41735	.	-	1	ID=vitri10g00030-mRNA-1:cds;Parent=vitri10g00030-mRNA-1
chr10_pilon_pilon	maker	exon	41829	41934	.	-	.	ID=vitri10g00030-mRNA-1:exon:3;Parent=vitri10g00030-mRNA-1
chr10_pilon_pilon	maker	CDS	41829	41934	.	-	2	ID=vitri10g00030-mRNA-1:cds;Parent=vitri10g00030-mRNA-1
chr10_pilon_pilon	maker	CDS	42701	43508	.	-	0	ID=vitri10g00030-mRNA-1:cds;Parent=vitri10g00030-mRNA-1
chr10_pilon_pilon	maker	exon	42701	43762	.	-	.	ID=vitri10g00030-mRNA-1:exon:2;Parent=vitri10g00030-mRNA-1
chr10_pilon_pilon	maker	five_prime_UTR	43509	43762	.	-	.	ID=vitri10g00030-mRNA-1:five_prime_utr;Parent=vitri10g00030-mRNA-1
###
chr10_pilon_pilon	maker	gene	79043	89380	.	-	.	ID=vitri10g00040;Name=vitri10g00040;Note=Protein of unknown function;Dbxref=CDD:cd15843,Coils:Coil,MobiDBLite:mobidb-lite
chr10_pilon_pilon	maker	mRNA	79043	89380	.	-	.	ID=vitri10g00040-mRNA-1;Parent=vitri10g00040;Name=vitri10g00040-mRNA-1;_AED=0.42;_eAED=0.42;_QI=0|0|0|0.6|0.25|0.2|5|0|422;Note=Protein of unknown function;Dbxref=CDD:cd15843,Coils:Coil,MobiDBLite:mobidb-lite
chr10_pilon_pilon	maker	exon	79043	79256	.	-	.	ID=vitri10g00040-mRNA-1:exon:10;Parent=vitri10g00040-mRNA-1
chr10_pilon_pilon	maker	CDS	79043	79256	.	-	1	ID=vitri10g00040-mRNA-1:cds;Parent=vitri10g00040-mRNA-1
chr10_pilon_pilon	maker	exon	86054	86199	.	-	.	ID=vitri10g00040-mRNA-1:exon:11;Parent=vitri10g00040-mRNA-1
chr10_pilon_pilon	maker	CDS	86054	86199	.	-	0	ID=vitri10g00040-mRNA-1:cds;Parent=vitri10g00040-mRNA-1
chr10_pilon_pilon	maker	exon	86292	86875	.	-	.	ID=vitri10g00040-mRNA-1:exon:12;Parent=vitri10g00040-mRNA-1
chr10_pilon_pilon	maker	CDS	86292	86875	.	-	2	ID=vitri10g00040-mRNA-1:cds;Parent=vitri10g00040-mRNA-1
chr10_pilon_pilon	maker	exon	86894	87014	.	-	.	ID=vitri10g00040-mRNA-1:exon:13;Parent=vitri10g00040-mRNA-1
chr10_pilon_pilon	maker	CDS	86894	87014	.	-	0	ID=vitri10g00040-mRNA-1:cds;Parent=vitri10g00040-mRNA-1
chr10_pilon_pilon	maker	exon	89177	89380	.	-	.	ID=vitri10g00040-mRNA-1:exon:14;Parent=vitri10g00040-mRNA-1
chr10_pilon_pilon	maker	CDS	89177	89380	.	-	0	ID=vitri10g00040-mRNA-1:cds;Parent=vitri10g00040-mRNA-1
###
chr10_pilon_pilon	maker	gene	110995	111228	.	+	.	ID=vitri10g00050;Name=vitri10g00050;Note=Protein of unknown function
chr10_pilon_pilon	maker	mRNA	110995	111228	.	+	.	ID=vitri10g00050-mRNA-1;Parent=vitri10g00050;Name=vitri10g00050-mRNA-1;_AED=0.42;_eAED=0.42;_QI=0|-1|0|1|-1|1|1|0|77;Note=Protein of unknown function
chr10_pilon_pilon	maker	exon	110995	111228	.	+	.	ID=vitri10g00050-mRNA-1:exon:9;Parent=vitri10g00050-mRNA-1
chr10_pilon_pilon	maker	CDS	110995	111228	.	+	0	ID=vitri10g00050-mRNA-1:cds;Parent=vitri10g00050-mRNA-1
###
chr10_pilon_pilon	maker	gene	113556	115113	.	-	.	ID=vitri10g00060;Name=vitri10g00060;Note=Protein of unknown function;Dbxref=MobiDBLite:mobidb-lite
chr10_pilon_pilon	maker	mRNA	113556	115113	.	-	.	ID=vitri10g00060-mRNA-1;Parent=vitri10g00060;Name=vitri10g00060-mRNA-1;_AED=0.38;_eAED=0.38;_QI=0|0|0|1|0|0.5|2|0|243;Note=Protein of unknown function;Dbxref=MobiDBLite:mobidb-lite
chr10_pilon_pilon	maker	exon	113556	114181	.	-	.	ID=vitri10g00060-mRNA-1:exon:32;Parent=vitri10g00060-mRNA-1
chr10_pilon_pilon	maker	CDS	113556	114181	.	-	2	ID=vitri10g00060-mRNA-1:cds;Parent=vitri10g00060-mRNA-1
chr10_pilon_pilon	maker	exon	115008	115113	.	-	.	ID=vitri10g00060-mRNA-1:exon:33;Parent=vitri10g00060-mRNA-1
chr10_pilon_pilon	maker	CDS	115008	115113	.	-	0	ID=vitri10g00060-mRNA-1:cds;Parent=vitri10g00060-mRNA-1
###
chr10_pilon_pilon	maker	gene	115228	117095	.	-	.	ID=vitri10g00070;Name=vitri10g00070;Note=Similar to DCP5-L: Decapping 5-like protein (Arabidopsis thaliana OX%3D3702);Dbxref=InterPro:IPR025762,MobiDBLite:mobidb-lite,PANTHER:PTHR13586,PANTHER:PTHR13586:SF3,ProSiteProfiles:PS51512
chr10_pilon_pilon	maker	mRNA	115228	117095	.	-	.	ID=vitri10g00070-mRNA-1;Parent=vitri10g00070;Name=vitri10g00070-mRNA-1;_AED=0.34;_eAED=0.34;_QI=0|0|0|1|0|0.2|5|0|321;Note=Similar to DCP5-L: Decapping 5-like protein (Arabidopsis thaliana OX%3D3702);Dbxref=InterPro:IPR025762,MobiDBLite:mobidb-lite,PANTHER:PTHR13586,PANTHER:PTHR13586:SF3,ProSiteProfiles:PS51512
chr10_pilon_pilon	maker	exon	115228	115340	.	-	.	ID=vitri10g00070-mRNA-1:exon:27;Parent=vitri10g00070-mRNA-1
chr10_pilon_pilon	maker	CDS	115228	115340	.	-	2	ID=vitri10g00070-mRNA-1:cds;Parent=vitri10g00070-mRNA-1
chr10_pilon_pilon	maker	exon	115537	115684	.	-	.	ID=vitri10g00070-mRNA-1:exon:28;Parent=vitri10g00070-mRNA-1
chr10_pilon_pilon	maker	CDS	115537	115684	.	-	0	ID=vitri10g00070-mRNA-1:cds;Parent=vitri10g00070-mRNA-1
chr10_pilon_pilon	maker	exon	115788	115951	.	-	.	ID=vitri10g00070-mRNA-1:exon:29;Parent=vitri10g00070-mRNA-1
chr10_pilon_pilon	maker	CDS	115788	115951	.	-	2	ID=vitri10g00070-mRNA-1:cds;Parent=vitri10g00070-mRNA-1
chr10_pilon_pilon	maker	exon	116549	116726	.	-	.	ID=vitri10g00070-mRNA-1:exon:30;Parent=vitri10g00070-mRNA-1
chr10_pilon_pilon	maker	CDS	116549	116726	.	-	0	ID=vitri10g00070-mRNA-1:cds;Parent=vitri10g00070-mRNA-1
chr10_pilon_pilon	maker	exon	116733	117095	.	-	.	ID=vitri10g00070-mRNA-1:exon:31;Parent=vitri10g00070-mRNA-1
chr10_pilon_pilon	maker	CDS	116733	117095	.	-	0	ID=vitri10g00070-mRNA-1:cds;Parent=vitri10g00070-mRNA-1
###
chr10_pilon_pilon	maker	gene	123596	125259	.	+	.	ID=vitri10g00080;Name=vitri10g00080;Note=Protein of unknown function
chr10_pilon_pilon	maker	mRNA	123596	125259	.	+	.	ID=vitri10g00080-mRNA-1;Parent=vitri10g00080;Name=vitri10g00080-mRNA-1;_AED=0.22;_eAED=0.25;_QI=0|0|0|1|0|0.25|4|0|266;Note=Protein of unknown function
chr10_pilon_pilon	maker	exon	123596	123958	.	+	.	ID=vitri10g00080-mRNA-1:exon:0;Parent=vitri10g00080-mRNA-1
chr10_pilon_pilon	maker	CDS	123596	123958	.	+	0	ID=vitri10g00080-mRNA-1:cds;Parent=vitri10g00080-mRNA-1
chr10_pilon_pilon	maker	exon	124218	124355	.	+	.	ID=vitri10g00080-mRNA-1:exon:1;Parent=vitri10g00080-mRNA-1
chr10_pilon_pilon	maker	CDS	124218	124355	.	+	0	ID=vitri10g00080-mRNA-1:cds;Parent=vitri10g00080-mRNA-1
chr10_pilon_pilon	maker	exon	124896	125085	.	+	.	ID=vitri10g00080-mRNA-1:exon:2;Parent=vitri10g00080-mRNA-1
chr10_pilon_pilon	maker	CDS	124896	125085	.	+	0	ID=vitri10g00080-mRNA-1:cds;Parent=vitri10g00080-mRNA-1
chr10_pilon_pilon	maker	exon	125150	125259	.	+	.	ID=vitri10g00080-mRNA-1:exon:3;Parent=vitri10g00080-mRNA-1
chr10_pilon_pilon	maker	CDS	125150	125259	.	+	2	ID=vitri10g00080-mRNA-1:cds;Parent=vitri10g00080-mRNA-1
###
chr10_pilon_pilon	maker	gene	129228	134148	.	+	.	ID=vitri10g00090;Name=vitri10g00090;Note=Similar to At3g12800: Peroxisomal 2%2C4-dienoyl-CoA reductase (Arabidopsis thaliana OX%3D3702);Dbxref=Gene3D:G3DSA:3.40.50.720,InterPro:IPR036291,PANTHER:PTHR43296,PANTHER:PTHR43296:SF1,SUPERFAMILY:SSF51735
chr10_pilon_pilon	maker	mRNA	129228	134148	.	+	.	ID=vitri10g00090-mRNA-1;Parent=vitri10g00090;Name=vitri10g00090-mRNA-1;_AED=0.21;_eAED=0.30;_QI=0|0|0|0.8|0.5|0.6|5|0|201;Note=Similar to At3g12800: Peroxisomal 2%2C4-dienoyl-CoA reductase (Arabidopsis thaliana OX%3D3702);Dbxref=Gene3D:G3DSA:3.40.50.720,InterPro:IPR036291,PANTHER:PTHR43296,PANTHER:PTHR43296:SF1,SUPERFAMILY:SSF51735
chr10_pilon_pilon	maker	exon	129228	129389	.	+	.	ID=vitri10g00090-mRNA-1:exon:4;Parent=vitri10g00090-mRNA-1
chr10_pilon_pilon	maker	CDS	129228	129389	.	+	0	ID=vitri10g00090-mRNA-1:cds;Parent=vitri10g00090-mRNA-1
chr10_pilon_pilon	maker	exon	129658	129825	.	+	.	ID=vitri10g00090-mRNA-1:exon:5;Parent=vitri10g00090-mRNA-1
chr10_pilon_pilon	maker	CDS	129658	129825	.	+	0	ID=vitri10g00090-mRNA-1:cds;Parent=vitri10g00090-mRNA-1
chr10_pilon_pilon	maker	exon	129845	129953	.	+	.	ID=vitri10g00090-mRNA-1:exon:6;Parent=vitri10g00090-mRNA-1
chr10_pilon_pilon	maker	CDS	129845	129953	.	+	0	ID=vitri10g00090-mRNA-1:cds;Parent=vitri10g00090-mRNA-1
chr10_pilon_pilon	maker	exon	130040	130199	.	+	.	ID=vitri10g00090-mRNA-1:exon:7;Parent=vitri10g00090-mRNA-1
chr10_pilon_pilon	maker	CDS	130040	130199	.	+	2	ID=vitri10g00090-mRNA-1:cds;Parent=vitri10g00090-mRNA-1
chr10_pilon_pilon	maker	exon	134142	134148	.	+	.	ID=vitri10g00090-mRNA-1:exon:8;Parent=vitri10g00090-mRNA-1
chr10_pilon_pilon	maker	CDS	134142	134148	.	+	1	ID=vitri10g00090-mRNA-1:cds;Parent=vitri10g00090-mRNA-1
###
chr10_pilon_pilon	maker	gene	139592	163092	.	-	.	ID=vitri10g00100;Name=vitri10g00100;Note=Similar to GTE1: Transcription factor GTE1 (Arabidopsis thaliana OX%3D3702);Dbxref=Coils:Coil,Gene3D:G3DSA:1.20.1270.220,Gene3D:G3DSA:1.20.920.10,InterPro:IPR001487,InterPro:IPR017413,InterPro:IPR027353,InterPro:IPR036427,InterPro:IPR038336,MobiDBLite:mobidb-lite,PANTHER:PTHR22880,PANTHER:PTHR22880:SF163,PRINTS:PR00503,Pfam:PF00439,Pfam:PF17035,ProSiteProfiles:PS50014,ProSiteProfiles:PS51525,SMART:SM00297,SUPERFAMILY:SSF47370;Ontology_term=GO:0005515,GO:0005634,GO:0006355
chr10_pilon_pilon	maker	mRNA	139592	163092	.	-	.	ID=vitri10g00100-mRNA-1;Parent=vitri10g00100;Name=vitri10g00100-mRNA-1;_AED=0.16;_eAED=0.22;_QI=0|0.75|0.77|1|0.37|0.66|9|259|415;Note=Similar to GTE1: Transcription factor GTE1 (Arabidopsis thaliana OX%3D3702);Dbxref=Coils:Coil,Gene3D:G3DSA:1.20.1270.220,Gene3D:G3DSA:1.20.920.10,InterPro:IPR001487,InterPro:IPR017413,InterPro:IPR027353,InterPro:IPR036427,InterPro:IPR038336,MobiDBLite:mobidb-lite,PANTHER:PTHR22880,PANTHER:PTHR22880:SF163,PRINTS:PR00503,Pfam:PF00439,Pfam:PF17035,ProSiteProfiles:PS50014,ProSiteProfiles:PS51525,SMART:SM00297,SUPERFAMILY:SSF47370;Ontology_term=GO:0005515,GO:0005634,GO:0006355
chr10_pilon_pilon	maker	three_prime_UTR	139592	139850	.	-	.	ID=vitri10g00100-mRNA-1:three_prime_utr;Parent=vitri10g00100-mRNA-1
chr10_pilon_pilon	maker	CDS	139851	140045	.	-	0	ID=vitri10g00100-mRNA-1:cds;Parent=vitri10g00100-mRNA-1
chr10_pilon_pilon	maker	CDS	140136	140286	.	-	1	ID=vitri10g00100-mRNA-1:cds;Parent=vitri10g00100-mRNA-1
chr10_pilon_pilon	maker	CDS	142021	142078	.	-	2	ID=vitri10g00100-mRNA-1:cds;Parent=vitri10g00100-mRNA-1
chr10_pilon_pilon	maker	CDS	142291	142381	.	-	0	ID=vitri10g00100-mRNA-1:cds;Parent=vitri10g00100-mRNA-1
chr10_pilon_pilon	maker	CDS	142577	142801	.	-	0	ID=vitri10g00100-mRNA-1:cds;Parent=vitri10g00100-mRNA-1
chr10_pilon_pilon	maker	CDS	149941	150018	.	-	0	ID=vitri10g00100-mRNA-1:cds;Parent=vitri10g00100-mRNA-1
chr10_pilon_pilon	maker	CDS	158336	158545	.	-	0	ID=vitri10g00100-mRNA-1:cds;Parent=vitri10g00100-mRNA-1
chr10_pilon_pilon	maker	exon	160437	160572	.	-	.	ID=vitri10g00100-mRNA-1:exon:17;Parent=vitri10g00100-mRNA-1
chr10_pilon_pilon	maker	CDS	160437	160572	.	-	1	ID=vitri10g00100-mRNA-1:cds;Parent=vitri10g00100-mRNA-1
chr10_pilon_pilon	maker	exon	162989	163092	.	-	.	ID=vitri10g00100-mRNA-1:exon:16;Parent=vitri10g00100-mRNA-1
chr10_pilon_pilon	maker	CDS	162989	163092	.	-	0	ID=vitri10g00100-mRNA-1:cds;Parent=vitri10g00100-mRNA-1
chr10_pilon_pilon	maker	mRNA	139592	163092	.	-	.	ID=vitri10g00100-mRNA-2;Parent=vitri10g00100;Name=vitri10g00100-mRNA-2;_AED=0.17;_eAED=0.17;_QI=0|0.75|0.66|1|0.37|0.66|9|259|403;Note=Similar to GTE6: Transcription factor GTE6 (Arabidopsis thaliana OX%3D3702);Dbxref=Coils:Coil,Gene3D:G3DSA:1.20.1270.220,Gene3D:G3DSA:1.20.920.10,InterPro:IPR001487,InterPro:IPR017413,InterPro:IPR027353,InterPro:IPR036427,InterPro:IPR038336,MobiDBLite:mobidb-lite,PANTHER:PTHR22880,PANTHER:PTHR22880:SF163,PRINTS:PR00503,Pfam:PF00439,Pfam:PF17035,ProSiteProfiles:PS50014,ProSiteProfiles:PS51525,SMART:SM00297,SUPERFAMILY:SSF47370;Ontology_term=GO:0005515,GO:0005634,GO:0006355
chr10_pilon_pilon	maker	three_prime_UTR	139592	139850	.	-	.	ID=vitri10g00100-mRNA-2:three_prime_utr;Parent=vitri10g00100-mRNA-2
chr10_pilon_pilon	maker	exon	139592	140045	.	-	.	ID=vitri10g00100-mRNA-1:exon:24;Parent=vitri10g00100-mRNA-1,vitri10g00100-mRNA-2
chr10_pilon_pilon	maker	CDS	139851	140045	.	-	0	ID=vitri10g00100-mRNA-2:cds;Parent=vitri10g00100-mRNA-2
chr10_pilon_pilon	maker	exon	140136	140286	.	-	.	ID=vitri10g00100-mRNA-1:exon:23;Parent=vitri10g00100-mRNA-1,vitri10g00100-mRNA-2
chr10_pilon_pilon	maker	CDS	140136	140286	.	-	1	ID=vitri10g00100-mRNA-2:cds;Parent=vitri10g00100-mRNA-2
chr10_pilon_pilon	maker	exon	142021	142078	.	-	.	ID=vitri10g00100-mRNA-1:exon:22;Parent=vitri10g00100-mRNA-1,vitri10g00100-mRNA-2
chr10_pilon_pilon	maker	CDS	142021	142078	.	-	2	ID=vitri10g00100-mRNA-2:cds;Parent=vitri10g00100-mRNA-2
chr10_pilon_pilon	maker	exon	142291	142381	.	-	.	ID=vitri10g00100-mRNA-1:exon:21;Parent=vitri10g00100-mRNA-1,vitri10g00100-mRNA-2
chr10_pilon_pilon	maker	CDS	142291	142381	.	-	0	ID=vitri10g00100-mRNA-2:cds;Parent=vitri10g00100-mRNA-2
chr10_pilon_pilon	maker	exon	142577	142801	.	-	.	ID=vitri10g00100-mRNA-1:exon:20;Parent=vitri10g00100-mRNA-1,vitri10g00100-mRNA-2
chr10_pilon_pilon	maker	CDS	142577	142801	.	-	0	ID=vitri10g00100-mRNA-2:cds;Parent=vitri10g00100-mRNA-2
chr10_pilon_pilon	maker	exon	149941	150018	.	-	.	ID=vitri10g00100-mRNA-1:exon:19;Parent=vitri10g00100-mRNA-1,vitri10g00100-mRNA-2
chr10_pilon_pilon	maker	CDS	149941	150018	.	-	0	ID=vitri10g00100-mRNA-2:cds;Parent=vitri10g00100-mRNA-2
chr10_pilon_pilon	maker	exon	158336	158545	.	-	.	ID=vitri10g00100-mRNA-1:exon:18;Parent=vitri10g00100-mRNA-1,vitri10g00100-mRNA-2
chr10_pilon_pilon	maker	CDS	158336	158545	.	-	0	ID=vitri10g00100-mRNA-2:cds;Parent=vitri10g00100-mRNA-2
chr10_pilon_pilon	maker	exon	160437	160561	.	-	.	ID=vitri10g00100-mRNA-2:exon:26;Parent=vitri10g00100-mRNA-2
chr10_pilon_pilon	maker	CDS	160437	160561	.	-	2	ID=vitri10g00100-mRNA-2:cds;Parent=vitri10g00100-mRNA-2
chr10_pilon_pilon	maker	exon	163014	163092	.	-	.	ID=vitri10g00100-mRNA-2:exon:25;Parent=vitri10g00100-mRNA-2
chr10_pilon_pilon	maker	CDS	163014	163092	.	-	0	ID=vitri10g00100-mRNA-2:cds;Parent=vitri10g00100-mRNA-2
###
chr10_pilon_pilon	maker	gene	187526	188032	.	-	.	ID=vitri10g00110;Name=vitri10g00110;Note=Similar to Ferredoxin-thioredoxin reductase%2C variable chain (Zea mays OX%3D4577);Dbxref=Gene3D:G3DSA:2.30.30.50,InterPro:IPR004207,InterPro:IPR008990,MobiDBLite:mobidb-lite,PANTHER:PTHR10949,PANTHER:PTHR10949:SF11,Pfam:PF02941,ProDom:PD015034,SUPERFAMILY:SSF50090;Ontology_term=GO:0015979
chr10_pilon_pilon	maker	mRNA	187526	188032	.	-	.	ID=vitri10g00110-mRNA-1;Parent=vitri10g00110;Name=vitri10g00110-mRNA-1;_AED=0.00;_eAED=0.00;_QI=0|-1|0|1|-1|1|1|0|168;Note=Similar to Ferredoxin-thioredoxin reductase%2C variable chain (Zea mays OX%3D4577);Dbxref=Gene3D:G3DSA:2.30.30.50,InterPro:IPR004207,InterPro:IPR008990,MobiDBLite:mobidb-lite,PANTHER:PTHR10949,PANTHER:PTHR10949:SF11,Pfam:PF02941,ProDom:PD015034,SUPERFAMILY:SSF50090;Ontology_term=GO:0015979
chr10_pilon_pilon	maker	exon	187526	188032	.	-	.	ID=vitri10g00110-mRNA-1:exon:15;Parent=vitri10g00110-mRNA-1
chr10_pilon_pilon	maker	CDS	187526	188032	.	-	0	ID=vitri10g00110-mRNA-1:cds;Parent=vitri10g00110-mRNA-1
###
chr10_pilon_pilon	maker	gene	214354	242139	.	+	.	ID=vitri10g00120;Name=vitri10g00120;Note=Protein of unknown function;Dbxref=InterPro:IPR028021,MobiDBLite:mobidb-lite,PANTHER:PTHR19845,Pfam:PF13925
chr10_pilon_pilon	maker	mRNA	214354	242139	.	+	.	ID=vitri10g00120-mRNA-1;Parent=vitri10g00120;Name=vitri10g00120-mRNA-1;_AED=0.18;_eAED=0.18;_QI=1293|1|1|1|0.57|0.65|20|403|565;Note=Protein of unknown function;Dbxref=InterPro:IPR028021,MobiDBLite:mobidb-lite,PANTHER:PTHR19845,Pfam:PF13925
chr10_pilon_pilon	maker	exon	214354	214805	.	+	.	ID=vitri10g00120-mRNA-1:exon:38;Parent=vitri10g00120-mRNA-1
chr10_pilon_pilon	maker	five_prime_UTR	214354	214805	.	+	.	ID=vitri10g00120-mRNA-1:five_prime_utr;Parent=vitri10g00120-mRNA-1
chr10_pilon_pilon	maker	exon	214903	215076	.	+	.	ID=vitri10g00120-mRNA-1:exon:39;Parent=vitri10g00120-mRNA-1
chr10_pilon_pilon	maker	five_prime_UTR	214903	215076	.	+	.	ID=vitri10g00120-mRNA-1:five_prime_utr;Parent=vitri10g00120-mRNA-1
chr10_pilon_pilon	maker	exon	215289	215418	.	+	.	ID=vitri10g00120-mRNA-1:exon:40;Parent=vitri10g00120-mRNA-1
chr10_pilon_pilon	maker	five_prime_UTR	215289	215418	.	+	.	ID=vitri10g00120-mRNA-1:five_prime_utr;Parent=vitri10g00120-mRNA-1
chr10_pilon_pilon	maker	exon	215647	215764	.	+	.	ID=vitri10g00120-mRNA-1:exon:41;Parent=vitri10g00120-mRNA-1
chr10_pilon_pilon	maker	five_prime_UTR	215647	215764	.	+	.	ID=vitri10g00120-mRNA-1:five_prime_utr;Parent=vitri10g00120-mRNA-1
chr10_pilon_pilon	maker	exon	215871	216097	.	+	.	ID=vitri10g00120-mRNA-1:exon:42;Parent=vitri10g00120-mRNA-1
chr10_pilon_pilon	maker	five_prime_UTR	215871	216097	.	+	.	ID=vitri10g00120-mRNA-1:five_prime_utr;Parent=vitri10g00120-mRNA-1
chr10_pilon_pilon	maker	exon	216871	216973	.	+	.	ID=vitri10g00120-mRNA-1:exon:43;Parent=vitri10g00120-mRNA-1
chr10_pilon_pilon	maker	five_prime_UTR	216871	216973	.	+	.	ID=vitri10g00120-mRNA-1:five_prime_utr;Parent=vitri10g00120-mRNA-1
chr10_pilon_pilon	maker	exon	218919	218989	.	+	.	ID=vitri10g00120-mRNA-1:exon:44;Parent=vitri10g00120-mRNA-1
chr10_pilon_pilon	maker	five_prime_UTR	218919	218989	.	+	.	ID=vitri10g00120-mRNA-1:five_prime_utr;Parent=vitri10g00120-mRNA-1
chr10_pilon_pilon	maker	five_prime_UTR	219122	219139	.	+	.	ID=vitri10g00120-mRNA-1:five_prime_utr;Parent=vitri10g00120-mRNA-1
chr10_pilon_pilon	maker	exon	219122	219196	.	+	.	ID=vitri10g00120-mRNA-1:exon:45;Parent=vitri10g00120-mRNA-1
chr10_pilon_pilon	maker	CDS	219140	219196	.	+	0	ID=vitri10g00120-mRNA-1:cds;Parent=vitri10g00120-mRNA-1
chr10_pilon_pilon	maker	exon	219299	219442	.	+	.	ID=vitri10g00120-mRNA-1:exon:46;Parent=vitri10g00120-mRNA-1
chr10_pilon_pilon	maker	CDS	219299	219442	.	+	0	ID=vitri10g00120-mRNA-1:cds;Parent=vitri10g00120-mRNA-1
chr10_pilon_pilon	maker	exon	219569	219803	.	+	.	ID=vitri10g00120-mRNA-1:exon:47;Parent=vitri10g00120-mRNA-1
chr10_pilon_pilon	maker	CDS	219569	219803	.	+	0	ID=vitri10g00120-mRNA-1:cds;Parent=vitri10g00120-mRNA-1
chr10_pilon_pilon	maker	exon	219977	220492	.	+	.	ID=vitri10g00120-mRNA-1:exon:48;Parent=vitri10g00120-mRNA-1
chr10_pilon_pilon	maker	CDS	219977	220492	.	+	2	ID=vitri10g00120-mRNA-1:cds;Parent=vitri10g00120-mRNA-1
chr10_pilon_pilon	maker	exon	224473	224532	.	+	.	ID=vitri10g00120-mRNA-1:exon:49;Parent=vitri10g00120-mRNA-1
chr10_pilon_pilon	maker	CDS	224473	224532	.	+	2	ID=vitri10g00120-mRNA-1:cds;Parent=vitri10g00120-mRNA-1
chr10_pilon_pilon	maker	exon	224609	224730	.	+	.	ID=vitri10g00120-mRNA-1:exon:50;Parent=vitri10g00120-mRNA-1
chr10_pilon_pilon	maker	CDS	224609	224730	.	+	2	ID=vitri10g00120-mRNA-1:cds;Parent=vitri10g00120-mRNA-1
chr10_pilon_pilon	maker	exon	227712	227837	.	+	.	ID=vitri10g00120-mRNA-1:exon:51;Parent=vitri10g00120-mRNA-1
chr10_pilon_pilon	maker	CDS	227712	227837	.	+	0	ID=vitri10g00120-mRNA-1:cds;Parent=vitri10g00120-mRNA-1
chr10_pilon_pilon	maker	exon	235019	235093	.	+	.	ID=vitri10g00120-mRNA-1:exon:52;Parent=vitri10g00120-mRNA-1
chr10_pilon_pilon	maker	CDS	235019	235093	.	+	0	ID=vitri10g00120-mRNA-1:cds;Parent=vitri10g00120-mRNA-1
chr10_pilon_pilon	maker	exon	235254	235366	.	+	.	ID=vitri10g00120-mRNA-1:exon:53;Parent=vitri10g00120-mRNA-1
chr10_pilon_pilon	maker	CDS	235254	235366	.	+	0	ID=vitri10g00120-mRNA-1:cds;Parent=vitri10g00120-mRNA-1
chr10_pilon_pilon	maker	exon	241175	241291	.	+	.	ID=vitri10g00120-mRNA-1:exon:54;Parent=vitri10g00120-mRNA-1
chr10_pilon_pilon	maker	CDS	241175	241291	.	+	1	ID=vitri10g00120-mRNA-1:cds;Parent=vitri10g00120-mRNA-1
chr10_pilon_pilon	maker	exon	241390	241458	.	+	.	ID=vitri10g00120-mRNA-1:exon:55;Parent=vitri10g00120-mRNA-1
chr10_pilon_pilon	maker	CDS	241390	241458	.	+	1	ID=vitri10g00120-mRNA-1:cds;Parent=vitri10g00120-mRNA-1
chr10_pilon_pilon	maker	exon	241577	241640	.	+	.	ID=vitri10g00120-mRNA-1:exon:56;Parent=vitri10g00120-mRNA-1
chr10_pilon_pilon	maker	CDS	241577	241640	.	+	1	ID=vitri10g00120-mRNA-1:cds;Parent=vitri10g00120-mRNA-1
chr10_pilon_pilon	maker	exon	241737	242139	.	+	.	ID=vitri10g00120-mRNA-1:exon:57;Parent=vitri10g00120-mRNA-1
chr10_pilon_pilon	maker	three_prime_UTR	241737	242139	.	+	.	ID=vitri10g00120-mRNA-1:three_prime_utr;Parent=vitri10g00120-mRNA-1
###
chr10_pilon_pilon	maker	gene	256308	256918	.	+	.	ID=vitri10g00130;Name=vitri10g00130;Note=Protein of unknown function;Dbxref=Gene3D:G3DSA:4.10.60.10,InterPro:IPR001878,InterPro:IPR036875,Pfam:PF00098,ProSiteProfiles:PS50158,SMART:SM00343,SUPERFAMILY:SSF57756;Ontology_term=GO:0003676,GO:0008270
chr10_pilon_pilon	maker	mRNA	256308	256918	.	+	.	ID=vitri10g00130-mRNA-1;Parent=vitri10g00130;Name=vitri10g00130-mRNA-1;_AED=0.40;_eAED=0.50;_QI=0|0|0|1|0|0|3|0|126;Note=Protein of unknown function;Dbxref=Gene3D:G3DSA:4.10.60.10,InterPro:IPR001878,InterPro:IPR036875,Pfam:PF00098,ProSiteProfiles:PS50158,SMART:SM00343,SUPERFAMILY:SSF57756;Ontology_term=GO:0003676,GO:0008270
chr10_pilon_pilon	maker	exon	256308	256409	.	+	.	ID=vitri10g00130-mRNA-1:exon:61;Parent=vitri10g00130-mRNA-1
chr10_pilon_pilon	maker	CDS	256308	256409	.	+	0	ID=vitri10g00130-mRNA-1:cds;Parent=vitri10g00130-mRNA-1
chr10_pilon_pilon	maker	exon	256544	256668	.	+	.	ID=vitri10g00130-mRNA-1:exon:62;Parent=vitri10g00130-mRNA-1
chr10_pilon_pilon	maker	CDS	256544	256668	.	+	0	ID=vitri10g00130-mRNA-1:cds;Parent=vitri10g00130-mRNA-1
chr10_pilon_pilon	maker	exon	256765	256918	.	+	.	ID=vitri10g00130-mRNA-1:exon:63;Parent=vitri10g00130-mRNA-1
chr10_pilon_pilon	maker	CDS	256765	256918	.	+	1	ID=vitri10g00130-mRNA-1:cds;Parent=vitri10g00130-mRNA-1
###
chr10_pilon_pilon	maker	gene	256963	258051	.	+	.	ID=vitri10g00140;Name=vitri10g00140;Note=Protein of unknown function
chr10_pilon_pilon	maker	mRNA	256963	258051	.	+	.	ID=vitri10g00140-mRNA-1;Parent=vitri10g00140;Name=vitri10g00140-mRNA-1;_AED=0.42;_eAED=0.42;_QI=0|0|0|1|0|0|2|0|101;Note=Protein of unknown function
chr10_pilon_pilon	maker	exon	256963	257065	.	+	.	ID=vitri10g00140-mRNA-1:exon:64;Parent=vitri10g00140-mRNA-1
chr10_pilon_pilon	maker	CDS	256963	257065	.	+	0	ID=vitri10g00140-mRNA-1:cds;Parent=vitri10g00140-mRNA-1
chr10_pilon_pilon	maker	exon	257849	258051	.	+	.	ID=vitri10g00140-mRNA-1:exon:65;Parent=vitri10g00140-mRNA-1
chr10_pilon_pilon	maker	CDS	257849	258051	.	+	2	ID=vitri10g00140-mRNA-1:cds;Parent=vitri10g00140-mRNA-1
###
chr10_pilon_pilon	maker	gene	261996	262640	.	-	.	ID=vitri10g00150;Name=vitri10g00150;Note=Protein of unknown function;Dbxref=InterPro:IPR008507,PANTHER:PTHR31343,PANTHER:PTHR31343:SF3,Pfam:PF05623
chr10_pilon_pilon	maker	mRNA	261996	262640	.	-	.	ID=vitri10g00150-mRNA-1;Parent=vitri10g00150;Name=vitri10g00150-mRNA-1;_AED=0.22;_eAED=0.23;_QI=0|0|0|1|1|1|3|0|142;Note=Protein of unknown function;Dbxref=InterPro:IPR008507,PANTHER:PTHR31343,PANTHER:PTHR31343:SF3,Pfam:PF05623
chr10_pilon_pilon	maker	exon	261996	262100	.	-	.	ID=vitri10g00150-mRNA-1:exon:58;Parent=vitri10g00150-mRNA-1
chr10_pilon_pilon	maker	CDS	261996	262100	.	-	0	ID=vitri10g00150-mRNA-1:cds;Parent=vitri10g00150-mRNA-1
chr10_pilon_pilon	maker	exon	262205	262385	.	-	.	ID=vitri10g00150-mRNA-1:exon:59;Parent=vitri10g00150-mRNA-1
chr10_pilon_pilon	maker	CDS	262205	262385	.	-	1	ID=vitri10g00150-mRNA-1:cds;Parent=vitri10g00150-mRNA-1
chr10_pilon_pilon	maker	exon	262498	262640	.	-	.	ID=vitri10g00150-mRNA-1:exon:60;Parent=vitri10g00150-mRNA-1
chr10_pilon_pilon	maker	CDS	262498	262640	.	-	0	ID=vitri10g00150-mRNA-1:cds;Parent=vitri10g00150-mRNA-1
###
chr10_pilon_pilon	maker	gene	290697	314528	.	+	.	ID=vitri10g00160;Name=vitri10g00160;Note=Similar to Smp_129340: Lissencephaly-1 homolog (Schistosoma mansoni OX%3D6183);Dbxref=CDD:cd00200,Gene3D:G3DSA:2.130.10.10,InterPro:IPR001680,InterPro:IPR015943,InterPro:IPR017986,InterPro:IPR019775,InterPro:IPR020472,InterPro:IPR028021,InterPro:IPR036322,MobiDBLite:mobidb-lite,PANTHER:PTHR19845,PRINTS:PR00320,Pfam:PF00400,Pfam:PF13925,ProSitePatterns:PS00678,ProSiteProfiles:PS50082,ProSiteProfiles:PS50294,SMART:SM00320,SUPERFAMILY:SSF50978;Ontology_term=GO:0005515
chr10_pilon_pilon	maker	mRNA	290697	314462	.	+	.	ID=vitri10g00160-mRNA-1;Parent=vitri10g00160;Name=vitri10g00160-mRNA-1;_AED=0.22;_eAED=0.22;_QI=0|0.88|0.83|0.94|0.35|0.55|18|2305|86;Note=Protein of unknown function;Dbxref=MobiDBLite:mobidb-lite
chr10_pilon_pilon	maker	exon	290697	290745	.	+	.	ID=vitri10g00160-mRNA-1:exon:65;Parent=vitri10g00160-mRNA-1
chr10_pilon_pilon	maker	CDS	290697	290745	.	+	0	ID=vitri10g00160-mRNA-1:cds;Parent=vitri10g00160-mRNA-1
chr10_pilon_pilon	maker	exon	290947	291000	.	+	.	ID=vitri10g00160-mRNA-1:exon:66;Parent=vitri10g00160-mRNA-1
chr10_pilon_pilon	maker	CDS	290947	291000	.	+	2	ID=vitri10g00160-mRNA-1:cds;Parent=vitri10g00160-mRNA-1
chr10_pilon_pilon	maker	exon	291149	291246	.	+	.	ID=vitri10g00160-mRNA-1:exon:67;Parent=vitri10g00160-mRNA-1
chr10_pilon_pilon	maker	CDS	291149	291246	.	+	2	ID=vitri10g00160-mRNA-1:cds;Parent=vitri10g00160-mRNA-1
chr10_pilon_pilon	maker	CDS	291344	291403	.	+	0	ID=vitri10g00160-mRNA-1:cds;Parent=vitri10g00160-mRNA-1
chr10_pilon_pilon	maker	three_prime_UTR	291404	291517	.	+	.	ID=vitri10g00160-mRNA-1:three_prime_utr;Parent=vitri10g00160-mRNA-1
chr10_pilon_pilon	maker	three_prime_UTR	291730	291860	.	+	.	ID=vitri10g00160-mRNA-1:three_prime_utr;Parent=vitri10g00160-mRNA-1
chr10_pilon_pilon	maker	three_prime_UTR	292089	292206	.	+	.	ID=vitri10g00160-mRNA-1:three_prime_utr;Parent=vitri10g00160-mRNA-1
chr10_pilon_pilon	maker	three_prime_UTR	292313	292539	.	+	.	ID=vitri10g00160-mRNA-1:three_prime_utr;Parent=vitri10g00160-mRNA-1
chr10_pilon_pilon	maker	three_prime_UTR	293314	293416	.	+	.	ID=vitri10g00160-mRNA-1:three_prime_utr;Parent=vitri10g00160-mRNA-1
chr10_pilon_pilon	maker	three_prime_UTR	295362	295432	.	+	.	ID=vitri10g00160-mRNA-1:three_prime_utr;Parent=vitri10g00160-mRNA-1
chr10_pilon_pilon	maker	three_prime_UTR	295565	295639	.	+	.	ID=vitri10g00160-mRNA-1:three_prime_utr;Parent=vitri10g00160-mRNA-1
chr10_pilon_pilon	maker	three_prime_UTR	295742	295885	.	+	.	ID=vitri10g00160-mRNA-1:three_prime_utr;Parent=vitri10g00160-mRNA-1
chr10_pilon_pilon	maker	exon	296011	296245	.	+	.	ID=vitri10g00160-mRNA-1:exon:76;Parent=vitri10g00160-mRNA-1
chr10_pilon_pilon	maker	three_prime_UTR	296011	296245	.	+	.	ID=vitri10g00160-mRNA-1:three_prime_utr;Parent=vitri10g00160-mRNA-1
chr10_pilon_pilon	maker	three_prime_UTR	296423	296938	.	+	.	ID=vitri10g00160-mRNA-1:three_prime_utr;Parent=vitri10g00160-mRNA-1
chr10_pilon_pilon	maker	three_prime_UTR	303113	303172	.	+	.	ID=vitri10g00160-mRNA-1:three_prime_utr;Parent=vitri10g00160-mRNA-1
chr10_pilon_pilon	maker	three_prime_UTR	303249	303370	.	+	.	ID=vitri10g00160-mRNA-1:three_prime_utr;Parent=vitri10g00160-mRNA-1
chr10_pilon_pilon	maker	three_prime_UTR	306361	306486	.	+	.	ID=vitri10g00160-mRNA-1:three_prime_utr;Parent=vitri10g00160-mRNA-1
chr10_pilon_pilon	maker	exon	314040	314113	.	+	.	ID=vitri10g00160-mRNA-1:exon:81;Parent=vitri10g00160-mRNA-1
chr10_pilon_pilon	maker	three_prime_UTR	314040	314113	.	+	.	ID=vitri10g00160-mRNA-1:three_prime_utr;Parent=vitri10g00160-mRNA-1
chr10_pilon_pilon	maker	exon	314274	314462	.	+	.	ID=vitri10g00160-mRNA-1:exon:82;Parent=vitri10g00160-mRNA-1
chr10_pilon_pilon	maker	three_prime_UTR	314274	314462	.	+	.	ID=vitri10g00160-mRNA-1:three_prime_utr;Parent=vitri10g00160-mRNA-1
chr10_pilon_pilon	maker	mRNA	290784	314528	.	+	.	ID=vitri10g00160-mRNA-2;Parent=vitri10g00160;Name=vitri10g00160-mRNA-2;_AED=0.21;_eAED=0.21;_QI=609|0.81|0.76|0.94|0.31|0.52|17|0|686;Note=Similar to Smp_129340: Lissencephaly-1 homolog (Schistosoma mansoni OX%3D6183);Dbxref=CDD:cd00200,Gene3D:G3DSA:2.130.10.10,InterPro:IPR001680,InterPro:IPR015943,InterPro:IPR017986,InterPro:IPR019775,InterPro:IPR020472,InterPro:IPR028021,InterPro:IPR036322,MobiDBLite:mobidb-lite,PANTHER:PTHR19845,PRINTS:PR00320,Pfam:PF00400,Pfam:PF13925,ProSitePatterns:PS00678,ProSiteProfiles:PS50082,ProSiteProfiles:PS50294,SMART:SM00320,SUPERFAMILY:SSF50978;Ontology_term=GO:0005515
chr10_pilon_pilon	maker	exon	290784	291246	.	+	.	ID=vitri10g00160-mRNA-2:exon:83;Parent=vitri10g00160-mRNA-2
chr10_pilon_pilon	maker	five_prime_UTR	290784	291246	.	+	.	ID=vitri10g00160-mRNA-2:five_prime_utr;Parent=vitri10g00160-mRNA-2
chr10_pilon_pilon	maker	five_prime_UTR	291344	291489	.	+	.	ID=vitri10g00160-mRNA-2:five_prime_utr;Parent=vitri10g00160-mRNA-2
chr10_pilon_pilon	maker	exon	291344	291517	.	+	.	ID=vitri10g00160-mRNA-1:exon:68;Parent=vitri10g00160-mRNA-1,vitri10g00160-mRNA-2
chr10_pilon_pilon	maker	CDS	291490	291517	.	+	0	ID=vitri10g00160-mRNA-2:cds;Parent=vitri10g00160-mRNA-2
chr10_pilon_pilon	maker	CDS	291730	291860	.	+	2	ID=vitri10g00160-mRNA-2:cds;Parent=vitri10g00160-mRNA-2
chr10_pilon_pilon	maker	CDS	292089	292206	.	+	0	ID=vitri10g00160-mRNA-2:cds;Parent=vitri10g00160-mRNA-2
chr10_pilon_pilon	maker	CDS	292313	292539	.	+	2	ID=vitri10g00160-mRNA-2:cds;Parent=vitri10g00160-mRNA-2
chr10_pilon_pilon	maker	CDS	293314	293416	.	+	0	ID=vitri10g00160-mRNA-2:cds;Parent=vitri10g00160-mRNA-2
chr10_pilon_pilon	maker	CDS	295362	295432	.	+	2	ID=vitri10g00160-mRNA-2:cds;Parent=vitri10g00160-mRNA-2
chr10_pilon_pilon	maker	CDS	295565	295639	.	+	0	ID=vitri10g00160-mRNA-2:cds;Parent=vitri10g00160-mRNA-2
chr10_pilon_pilon	maker	CDS	295742	295885	.	+	0	ID=vitri10g00160-mRNA-2:cds;Parent=vitri10g00160-mRNA-2
chr10_pilon_pilon	maker	CDS	296011	296122	.	+	0	ID=vitri10g00160-mRNA-2:cds;Parent=vitri10g00160-mRNA-2
chr10_pilon_pilon	maker	CDS	296423	296938	.	+	2	ID=vitri10g00160-mRNA-2:cds;Parent=vitri10g00160-mRNA-2
chr10_pilon_pilon	maker	CDS	303113	303172	.	+	2	ID=vitri10g00160-mRNA-2:cds;Parent=vitri10g00160-mRNA-2
chr10_pilon_pilon	maker	CDS	303249	303370	.	+	2	ID=vitri10g00160-mRNA-2:cds;Parent=vitri10g00160-mRNA-2
chr10_pilon_pilon	maker	CDS	306361	306486	.	+	0	ID=vitri10g00160-mRNA-2:cds;Parent=vitri10g00160-mRNA-2
chr10_pilon_pilon	maker	CDS	314051	314113	.	+	0	ID=vitri10g00160-mRNA-2:cds;Parent=vitri10g00160-mRNA-2
chr10_pilon_pilon	maker	CDS	314274	314386	.	+	0	ID=vitri10g00160-mRNA-2:cds;Parent=vitri10g00160-mRNA-2
chr10_pilon_pilon	maker	CDS	314477	314528	.	+	1	ID=vitri10g00160-mRNA-2:cds;Parent=vitri10g00160-mRNA-2
chr10_pilon_pilon	maker	mRNA	290784	314528	.	+	.	ID=vitri10g00160-mRNA-3;Parent=vitri10g00160;Name=vitri10g00160-mRNA-3;_AED=0.20;_eAED=0.20;_QI=706|0.8|0.75|0.93|0.33|0.56|16|0|686;Note=Similar to At5g23430: Katanin p80 WD40 repeat-containing subunit B1 homolog (Arabidopsis thaliana OX%3D3702);Dbxref=CDD:cd00200,Gene3D:G3DSA:2.130.10.10,InterPro:IPR001680,InterPro:IPR015943,InterPro:IPR017986,InterPro:IPR019775,InterPro:IPR020472,InterPro:IPR028021,InterPro:IPR036322,MobiDBLite:mobidb-lite,PANTHER:PTHR19845,PRINTS:PR00320,Pfam:PF00400,Pfam:PF13925,ProSitePatterns:PS00678,ProSiteProfiles:PS50082,ProSiteProfiles:PS50294,SMART:SM00320,SUPERFAMILY:SSF50978;Ontology_term=GO:0005515
chr10_pilon_pilon	maker	five_prime_UTR	290784	291489	.	+	.	ID=vitri10g00160-mRNA-3:five_prime_utr;Parent=vitri10g00160-mRNA-3
chr10_pilon_pilon	maker	exon	290784	291517	.	+	.	ID=vitri10g00160-mRNA-3:exon:88;Parent=vitri10g00160-mRNA-3
chr10_pilon_pilon	maker	CDS	291490	291517	.	+	0	ID=vitri10g00160-mRNA-3:cds;Parent=vitri10g00160-mRNA-3
chr10_pilon_pilon	maker	exon	291730	291860	.	+	.	ID=vitri10g00160-mRNA-1:exon:69;Parent=vitri10g00160-mRNA-1,vitri10g00160-mRNA-2,vitri10g00160-mRNA-3
chr10_pilon_pilon	maker	CDS	291730	291860	.	+	2	ID=vitri10g00160-mRNA-3:cds;Parent=vitri10g00160-mRNA-3
chr10_pilon_pilon	maker	exon	292089	292206	.	+	.	ID=vitri10g00160-mRNA-1:exon:70;Parent=vitri10g00160-mRNA-1,vitri10g00160-mRNA-2,vitri10g00160-mRNA-3
chr10_pilon_pilon	maker	CDS	292089	292206	.	+	0	ID=vitri10g00160-mRNA-3:cds;Parent=vitri10g00160-mRNA-3
chr10_pilon_pilon	maker	exon	292313	292539	.	+	.	ID=vitri10g00160-mRNA-1:exon:71;Parent=vitri10g00160-mRNA-1,vitri10g00160-mRNA-2,vitri10g00160-mRNA-3
chr10_pilon_pilon	maker	CDS	292313	292539	.	+	2	ID=vitri10g00160-mRNA-3:cds;Parent=vitri10g00160-mRNA-3
chr10_pilon_pilon	maker	exon	293314	293416	.	+	.	ID=vitri10g00160-mRNA-1:exon:72;Parent=vitri10g00160-mRNA-1,vitri10g00160-mRNA-2,vitri10g00160-mRNA-3
chr10_pilon_pilon	maker	CDS	293314	293416	.	+	0	ID=vitri10g00160-mRNA-3:cds;Parent=vitri10g00160-mRNA-3
chr10_pilon_pilon	maker	exon	295362	295432	.	+	.	ID=vitri10g00160-mRNA-1:exon:73;Parent=vitri10g00160-mRNA-1,vitri10g00160-mRNA-2,vitri10g00160-mRNA-3
chr10_pilon_pilon	maker	CDS	295362	295432	.	+	2	ID=vitri10g00160-mRNA-3:cds;Parent=vitri10g00160-mRNA-3
chr10_pilon_pilon	maker	exon	295565	295639	.	+	.	ID=vitri10g00160-mRNA-1:exon:74;Parent=vitri10g00160-mRNA-1,vitri10g00160-mRNA-2,vitri10g00160-mRNA-3
chr10_pilon_pilon	maker	CDS	295565	295639	.	+	0	ID=vitri10g00160-mRNA-3:cds;Parent=vitri10g00160-mRNA-3
chr10_pilon_pilon	maker	exon	295742	295885	.	+	.	ID=vitri10g00160-mRNA-1:exon:75;Parent=vitri10g00160-mRNA-1,vitri10g00160-mRNA-2,vitri10g00160-mRNA-3
chr10_pilon_pilon	maker	CDS	295742	295885	.	+	0	ID=vitri10g00160-mRNA-3:cds;Parent=vitri10g00160-mRNA-3
chr10_pilon_pilon	maker	exon	296011	296122	.	+	.	ID=vitri10g00160-mRNA-2:exon:84;Parent=vitri10g00160-mRNA-2,vitri10g00160-mRNA-3
chr10_pilon_pilon	maker	CDS	296011	296122	.	+	0	ID=vitri10g00160-mRNA-3:cds;Parent=vitri10g00160-mRNA-3
chr10_pilon_pilon	maker	exon	296423	296938	.	+	.	ID=vitri10g00160-mRNA-1:exon:77;Parent=vitri10g00160-mRNA-1,vitri10g00160-mRNA-2,vitri10g00160-mRNA-3
chr10_pilon_pilon	maker	CDS	296423	296938	.	+	2	ID=vitri10g00160-mRNA-3:cds;Parent=vitri10g00160-mRNA-3
chr10_pilon_pilon	maker	exon	303113	303172	.	+	.	ID=vitri10g00160-mRNA-1:exon:78;Parent=vitri10g00160-mRNA-1,vitri10g00160-mRNA-2,vitri10g00160-mRNA-3
chr10_pilon_pilon	maker	CDS	303113	303172	.	+	2	ID=vitri10g00160-mRNA-3:cds;Parent=vitri10g00160-mRNA-3
chr10_pilon_pilon	maker	exon	303249	303370	.	+	.	ID=vitri10g00160-mRNA-1:exon:79;Parent=vitri10g00160-mRNA-1,vitri10g00160-mRNA-2,vitri10g00160-mRNA-3
chr10_pilon_pilon	maker	CDS	303249	303370	.	+	2	ID=vitri10g00160-mRNA-3:cds;Parent=vitri10g00160-mRNA-3
chr10_pilon_pilon	maker	exon	306361	306486	.	+	.	ID=vitri10g00160-mRNA-1:exon:80;Parent=vitri10g00160-mRNA-1,vitri10g00160-mRNA-2,vitri10g00160-mRNA-3
chr10_pilon_pilon	maker	CDS	306361	306486	.	+	0	ID=vitri10g00160-mRNA-3:cds;Parent=vitri10g00160-mRNA-3
chr10_pilon_pilon	maker	exon	314051	314113	.	+	.	ID=vitri10g00160-mRNA-2:exon:85;Parent=vitri10g00160-mRNA-2,vitri10g00160-mRNA-3
chr10_pilon_pilon	maker	CDS	314051	314113	.	+	0	ID=vitri10g00160-mRNA-3:cds;Parent=vitri10g00160-mRNA-3
chr10_pilon_pilon	maker	exon	314274	314386	.	+	.	ID=vitri10g00160-mRNA-2:exon:86;Parent=vitri10g00160-mRNA-2,vitri10g00160-mRNA-3
chr10_pilon_pilon	maker	CDS	314274	314386	.	+	0	ID=vitri10g00160-mRNA-3:cds;Parent=vitri10g00160-mRNA-3
chr10_pilon_pilon	maker	exon	314477	314528	.	+	.	ID=vitri10g00160-mRNA-2:exon:87;Parent=vitri10g00160-mRNA-2,vitri10g00160-mRNA-3
chr10_pilon_pilon	maker	CDS	314477	314528	.	+	1	ID=vitri10g00160-mRNA-3:cds;Parent=vitri10g00160-mRNA-3
###
chr10_pilon_pilon	maker	gene	300555	300908	.	-	.	ID=vitri10g00170;Name=vitri10g00170;Note=Protein of unknown function;Dbxref=MobiDBLite:mobidb-lite,PANTHER:PTHR28039,PANTHER:PTHR28039:SF2
chr10_pilon_pilon	maker	mRNA	300555	300908	.	-	.	ID=vitri10g00170-mRNA-1;Parent=vitri10g00170;Name=vitri10g00170-mRNA-1;_AED=0.33;_eAED=0.33;_QI=0|-1|0|1|-1|1|1|0|117;Note=Protein of unknown function;Dbxref=MobiDBLite:mobidb-lite,PANTHER:PTHR28039,PANTHER:PTHR28039:SF2
chr10_pilon_pilon	maker	exon	300555	300908	.	-	.	ID=vitri10g00170-mRNA-1:exon:114;Parent=vitri10g00170-mRNA-1
chr10_pilon_pilon	maker	CDS	300555	300908	.	-	0	ID=vitri10g00170-mRNA-1:cds;Parent=vitri10g00170-mRNA-1
###
chr10_pilon_pilon	maker	gene	301224	301556	.	-	.	ID=vitri10g00180;Name=vitri10g00180;Note=Protein of unknown function;Dbxref=PANTHER:PTHR28039,PANTHER:PTHR28039:SF2
chr10_pilon_pilon	maker	mRNA	301224	301556	.	-	.	ID=vitri10g00180-mRNA-1;Parent=vitri10g00180;Name=vitri10g00180-mRNA-1;_AED=0.33;_eAED=0.36;_QI=0|-1|0|1|-1|1|1|0|110;Note=Protein of unknown function;Dbxref=PANTHER:PTHR28039,PANTHER:PTHR28039:SF2
chr10_pilon_pilon	maker	exon	301224	301556	.	-	.	ID=vitri10g00180-mRNA-1:exon:115;Parent=vitri10g00180-mRNA-1
chr10_pilon_pilon	maker	CDS	301224	301556	.	-	0	ID=vitri10g00180-mRNA-1:cds;Parent=vitri10g00180-mRNA-1
###
chr10_pilon_pilon	maker	gene	325439	326401	.	+	.	ID=vitri10g00190;Name=vitri10g00190;Note=Protein of unknown function;Dbxref=InterPro:IPR028021,PANTHER:PTHR19845,PANTHER:PTHR19845:SF5,Pfam:PF13925,SignalP_EUK:SignalP-noTM
chr10_pilon_pilon	maker	mRNA	325439	326401	.	+	.	ID=vitri10g00190-mRNA-1;Parent=vitri10g00190;Name=vitri10g00190-mRNA-1;_AED=0.01;_eAED=0.01;_QI=26|1|1|1|1|1|3|492|75;Note=Protein of unknown function;Dbxref=InterPro:IPR028021,PANTHER:PTHR19845,PANTHER:PTHR19845:SF5,Pfam:PF13925,SignalP_EUK:SignalP-noTM
chr10_pilon_pilon	maker	five_prime_UTR	325439	325464	.	+	.	ID=vitri10g00190-mRNA-1:five_prime_utr;Parent=vitri10g00190-mRNA-1
chr10_pilon_pilon	maker	exon	325439	325559	.	+	.	ID=vitri10g00190-mRNA-1:exon:62;Parent=vitri10g00190-mRNA-1
chr10_pilon_pilon	maker	CDS	325465	325559	.	+	0	ID=vitri10g00190-mRNA-1:cds;Parent=vitri10g00190-mRNA-1
chr10_pilon_pilon	maker	exon	325659	325727	.	+	.	ID=vitri10g00190-mRNA-1:exon:63;Parent=vitri10g00190-mRNA-1
chr10_pilon_pilon	maker	CDS	325659	325727	.	+	1	ID=vitri10g00190-mRNA-1:cds;Parent=vitri10g00190-mRNA-1
chr10_pilon_pilon	maker	CDS	325846	325909	.	+	1	ID=vitri10g00190-mRNA-1:cds;Parent=vitri10g00190-mRNA-1
chr10_pilon_pilon	maker	exon	325846	326401	.	+	.	ID=vitri10g00190-mRNA-1:exon:64;Parent=vitri10g00190-mRNA-1
chr10_pilon_pilon	maker	three_prime_UTR	325910	326401	.	+	.	ID=vitri10g00190-mRNA-1:three_prime_utr;Parent=vitri10g00190-mRNA-1
###
chr10_pilon_pilon	maker	gene	350847	352364	.	+	.	ID=vitri10g00200;Name=vitri10g00200;Note=Protein of unknown function;Dbxref=Gene3D:G3DSA:4.10.60.10,InterPro:IPR001878,InterPro:IPR036875,Pfam:PF00098,ProSiteProfiles:PS50158,SMART:SM00343,SUPERFAMILY:SSF57756;Ontology_term=GO:0003676,GO:0008270
chr10_pilon_pilon	maker	mRNA	350847	352364	.	+	.	ID=vitri10g00200-mRNA-1;Parent=vitri10g00200;Name=vitri10g00200-mRNA-1;_AED=0.39;_eAED=0.39;_QI=0|0|0|1|0|0|3|0|184;Note=Protein of unknown function;Dbxref=Gene3D:G3DSA:4.10.60.10,InterPro:IPR001878,InterPro:IPR036875,Pfam:PF00098,ProSiteProfiles:PS50158,SMART:SM00343,SUPERFAMILY:SSF57756;Ontology_term=GO:0003676,GO:0008270
chr10_pilon_pilon	maker	exon	350847	350967	.	+	.	ID=vitri10g00200-mRNA-1:exon:103;Parent=vitri10g00200-mRNA-1
chr10_pilon_pilon	maker	CDS	350847	350967	.	+	0	ID=vitri10g00200-mRNA-1:cds;Parent=vitri10g00200-mRNA-1
chr10_pilon_pilon	maker	exon	351100	351358	.	+	.	ID=vitri10g00200-mRNA-1:exon:104;Parent=vitri10g00200-mRNA-1
chr10_pilon_pilon	maker	CDS	351100	351358	.	+	2	ID=vitri10g00200-mRNA-1:cds;Parent=vitri10g00200-mRNA-1
chr10_pilon_pilon	maker	exon	352190	352364	.	+	.	ID=vitri10g00200-mRNA-1:exon:105;Parent=vitri10g00200-mRNA-1
chr10_pilon_pilon	maker	CDS	352190	352364	.	+	1	ID=vitri10g00200-mRNA-1:cds;Parent=vitri10g00200-mRNA-1
###
chr10_pilon_pilon	maker	gene	355674	357027	.	-	.	ID=vitri10g00210;Name=vitri10g00210;Note=Protein of unknown function;Dbxref=InterPro:IPR008507,PANTHER:PTHR31343,PANTHER:PTHR31343:SF3,Pfam:PF05623
chr10_pilon_pilon	maker	mRNA	355674	357027	.	-	.	ID=vitri10g00210-mRNA-1;Parent=vitri10g00210;Name=vitri10g00210-mRNA-1;_AED=0.13;_eAED=0.26;_QI=0|0|0|1|0.66|0.5|4|0|226;Note=Protein of unknown function;Dbxref=InterPro:IPR008507,PANTHER:PTHR31343,PANTHER:PTHR31343:SF3,Pfam:PF05623
chr10_pilon_pilon	maker	exon	355674	355820	.	-	.	ID=vitri10g00210-mRNA-1:exon:99;Parent=vitri10g00210-mRNA-1
chr10_pilon_pilon	maker	CDS	355674	355820	.	-	0	ID=vitri10g00210-mRNA-1:cds;Parent=vitri10g00210-mRNA-1
chr10_pilon_pilon	maker	exon	356278	356367	.	-	.	ID=vitri10g00210-mRNA-1:exon:100;Parent=vitri10g00210-mRNA-1
chr10_pilon_pilon	maker	CDS	356278	356367	.	-	0	ID=vitri10g00210-mRNA-1:cds;Parent=vitri10g00210-mRNA-1
chr10_pilon_pilon	maker	exon	356472	356652	.	-	.	ID=vitri10g00210-mRNA-1:exon:101;Parent=vitri10g00210-mRNA-1
chr10_pilon_pilon	maker	CDS	356472	356652	.	-	1	ID=vitri10g00210-mRNA-1:cds;Parent=vitri10g00210-mRNA-1
chr10_pilon_pilon	maker	exon	356765	357027	.	-	.	ID=vitri10g00210-mRNA-1:exon:102;Parent=vitri10g00210-mRNA-1
chr10_pilon_pilon	maker	CDS	356765	357027	.	-	0	ID=vitri10g00210-mRNA-1:cds;Parent=vitri10g00210-mRNA-1
###
chr10_pilon_pilon	maker	gene	364582	380342	.	-	.	ID=vitri10g00220;Name=vitri10g00220;Note=Protein of unknown function;Dbxref=InterPro:IPR021920,MobiDBLite:mobidb-lite,PANTHER:PTHR33102,PANTHER:PTHR33102:SF13,Pfam:PF12049
chr10_pilon_pilon	maker	mRNA	364582	380342	.	-	.	ID=vitri10g00220-mRNA-1;Parent=vitri10g00220;Name=vitri10g00220-mRNA-1;_AED=0.14;_eAED=0.14;_QI=70|0.85|0.87|1|0.42|0.62|8|279|319;Note=Protein of unknown function;Dbxref=InterPro:IPR021920,MobiDBLite:mobidb-lite,PANTHER:PTHR33102,PANTHER:PTHR33102:SF13,Pfam:PF12049
chr10_pilon_pilon	maker	three_prime_UTR	364582	364860	.	-	.	ID=vitri10g00220-mRNA-1:three_prime_utr;Parent=vitri10g00220-mRNA-1
chr10_pilon_pilon	maker	CDS	364861	364963	.	-	1	ID=vitri10g00220-mRNA-1:cds;Parent=vitri10g00220-mRNA-1
chr10_pilon_pilon	maker	CDS	365053	365124	.	-	1	ID=vitri10g00220-mRNA-1:cds;Parent=vitri10g00220-mRNA-1
chr10_pilon_pilon	maker	CDS	365246	365367	.	-	0	ID=vitri10g00220-mRNA-1:cds;Parent=vitri10g00220-mRNA-1
chr10_pilon_pilon	maker	CDS	371980	372039	.	-	0	ID=vitri10g00220-mRNA-1:cds;Parent=vitri10g00220-mRNA-1
chr10_pilon_pilon	maker	exon	372156	372300	.	-	.	ID=vitri10g00220-mRNA-1:exon:93;Parent=vitri10g00220-mRNA-1
chr10_pilon_pilon	maker	CDS	372156	372300	.	-	1	ID=vitri10g00220-mRNA-1:cds;Parent=vitri10g00220-mRNA-1
chr10_pilon_pilon	maker	CDS	375854	375939	.	-	0	ID=vitri10g00220-mRNA-1:cds;Parent=vitri10g00220-mRNA-1
chr10_pilon_pilon	maker	CDS	379823	379910	.	-	1	ID=vitri10g00220-mRNA-1:cds;Parent=vitri10g00220-mRNA-1
chr10_pilon_pilon	maker	CDS	379989	380272	.	-	0	ID=vitri10g00220-mRNA-1:cds;Parent=vitri10g00220-mRNA-1
chr10_pilon_pilon	maker	five_prime_UTR	380273	380342	.	-	.	ID=vitri10g00220-mRNA-1:five_prime_utr;Parent=vitri10g00220-mRNA-1
chr10_pilon_pilon	maker	mRNA	364582	380342	.	-	.	ID=vitri10g00220-mRNA-2;Parent=vitri10g00220;Name=vitri10g00220-mRNA-2;_AED=0.11;_eAED=0.11;_QI=70|1|1|1|0.42|0.62|8|279|297;Note=Protein of unknown function;Dbxref=InterPro:IPR021920,MobiDBLite:mobidb-lite,PANTHER:PTHR33102,PANTHER:PTHR33102:SF13,Pfam:PF12049
chr10_pilon_pilon	maker	three_prime_UTR	364582	364860	.	-	.	ID=vitri10g00220-mRNA-2:three_prime_utr;Parent=vitri10g00220-mRNA-2
chr10_pilon_pilon	maker	exon	364582	364963	.	-	.	ID=vitri10g00220-mRNA-1:exon:97;Parent=vitri10g00220-mRNA-1,vitri10g00220-mRNA-2
chr10_pilon_pilon	maker	CDS	364861	364963	.	-	1	ID=vitri10g00220-mRNA-2:cds;Parent=vitri10g00220-mRNA-2
chr10_pilon_pilon	maker	exon	365053	365124	.	-	.	ID=vitri10g00220-mRNA-1:exon:96;Parent=vitri10g00220-mRNA-1,vitri10g00220-mRNA-2
chr10_pilon_pilon	maker	CDS	365053	365124	.	-	1	ID=vitri10g00220-mRNA-2:cds;Parent=vitri10g00220-mRNA-2
chr10_pilon_pilon	maker	exon	365246	365367	.	-	.	ID=vitri10g00220-mRNA-1:exon:95;Parent=vitri10g00220-mRNA-1,vitri10g00220-mRNA-2
chr10_pilon_pilon	maker	CDS	365246	365367	.	-	0	ID=vitri10g00220-mRNA-2:cds;Parent=vitri10g00220-mRNA-2
chr10_pilon_pilon	maker	exon	371980	372039	.	-	.	ID=vitri10g00220-mRNA-1:exon:94;Parent=vitri10g00220-mRNA-1,vitri10g00220-mRNA-2
chr10_pilon_pilon	maker	CDS	371980	372039	.	-	0	ID=vitri10g00220-mRNA-2:cds;Parent=vitri10g00220-mRNA-2
chr10_pilon_pilon	maker	exon	372222	372300	.	-	.	ID=vitri10g00220-mRNA-2:exon:98;Parent=vitri10g00220-mRNA-2
chr10_pilon_pilon	maker	CDS	372222	372300	.	-	1	ID=vitri10g00220-mRNA-2:cds;Parent=vitri10g00220-mRNA-2
chr10_pilon_pilon	maker	exon	375854	375939	.	-	.	ID=vitri10g00220-mRNA-1:exon:92;Parent=vitri10g00220-mRNA-1,vitri10g00220-mRNA-2
chr10_pilon_pilon	maker	CDS	375854	375939	.	-	0	ID=vitri10g00220-mRNA-2:cds;Parent=vitri10g00220-mRNA-2
chr10_pilon_pilon	maker	exon	379823	379910	.	-	.	ID=vitri10g00220-mRNA-1:exon:91;Parent=vitri10g00220-mRNA-1,vitri10g00220-mRNA-2
chr10_pilon_pilon	maker	CDS	379823	379910	.	-	1	ID=vitri10g00220-mRNA-2:cds;Parent=vitri10g00220-mRNA-2
chr10_pilon_pilon	maker	CDS	379989	380272	.	-	0	ID=vitri10g00220-mRNA-2:cds;Parent=vitri10g00220-mRNA-2
chr10_pilon_pilon	maker	exon	379989	380342	.	-	.	ID=vitri10g00220-mRNA-1:exon:90;Parent=vitri10g00220-mRNA-1,vitri10g00220-mRNA-2
chr10_pilon_pilon	maker	five_prime_UTR	380273	380342	.	-	.	ID=vitri10g00220-mRNA-2:five_prime_utr;Parent=vitri10g00220-mRNA-2
###
chr10_pilon_pilon	maker	gene	402071	416475	.	-	.	ID=vitri10g00230;Name=vitri10g00230;Note=Similar to Alpha-galactosidase (Coffea arabica OX%3D13443);Dbxref=CDD:cd14792,Gene3D:G3DSA:2.60.40.1180,Gene3D:G3DSA:3.20.20.70,InterPro:IPR000111,InterPro:IPR002241,InterPro:IPR013780,InterPro:IPR013785,InterPro:IPR017853,InterPro:IPR035373,MobiDBLite:mobidb-lite,PANTHER:PTHR11452,PANTHER:PTHR11452:SF37,PRINTS:PR00740,Pfam:PF16499,Pfam:PF17450,ProSitePatterns:PS00512,SUPERFAMILY:SSF51011,SUPERFAMILY:SSF51445,SignalP_EUK:SignalP-noTM;Ontology_term=GO:0003824,GO:0004553,GO:0005975
chr10_pilon_pilon	maker	mRNA	402071	416475	.	-	.	ID=vitri10g00230-mRNA-1;Parent=vitri10g00230;Name=vitri10g00230-mRNA-1;_AED=0.16;_eAED=0.18;_QI=63|0.39|0.41|0.96|0.64|0.68|29|0|788;Note=Similar to Alpha-galactosidase (Coffea arabica OX%3D13443);Dbxref=CDD:cd14792,Gene3D:G3DSA:2.60.40.1180,Gene3D:G3DSA:3.20.20.70,InterPro:IPR000111,InterPro:IPR002241,InterPro:IPR013780,InterPro:IPR013785,InterPro:IPR017853,InterPro:IPR035373,MobiDBLite:mobidb-lite,PANTHER:PTHR11452,PANTHER:PTHR11452:SF37,PRINTS:PR00740,Pfam:PF16499,Pfam:PF17450,ProSitePatterns:PS00512,SUPERFAMILY:SSF51011,SUPERFAMILY:SSF51445,SignalP_EUK:SignalP-noTM;Ontology_term=GO:0003824,GO:0004553,GO:0005975
chr10_pilon_pilon	maker	exon	402071	402077	.	-	.	ID=vitri10g00230-mRNA-1:exon:107;Parent=vitri10g00230-mRNA-1
chr10_pilon_pilon	maker	CDS	402071	402077	.	-	1	ID=vitri10g00230-mRNA-1:cds;Parent=vitri10g00230-mRNA-1
chr10_pilon_pilon	maker	exon	402424	402488	.	-	.	ID=vitri10g00230-mRNA-1:exon:106;Parent=vitri10g00230-mRNA-1
chr10_pilon_pilon	maker	CDS	402424	402488	.	-	0	ID=vitri10g00230-mRNA-1:cds;Parent=vitri10g00230-mRNA-1
chr10_pilon_pilon	maker	exon	402584	402724	.	-	.	ID=vitri10g00230-mRNA-1:exon:105;Parent=vitri10g00230-mRNA-1
chr10_pilon_pilon	maker	CDS	402584	402724	.	-	0	ID=vitri10g00230-mRNA-1:cds;Parent=vitri10g00230-mRNA-1
chr10_pilon_pilon	maker	exon	403715	403764	.	-	.	ID=vitri10g00230-mRNA-1:exon:104;Parent=vitri10g00230-mRNA-1
chr10_pilon_pilon	maker	CDS	403715	403764	.	-	2	ID=vitri10g00230-mRNA-1:cds;Parent=vitri10g00230-mRNA-1
chr10_pilon_pilon	maker	exon	403928	404018	.	-	.	ID=vitri10g00230-mRNA-1:exon:103;Parent=vitri10g00230-mRNA-1
chr10_pilon_pilon	maker	CDS	403928	404018	.	-	0	ID=vitri10g00230-mRNA-1:cds;Parent=vitri10g00230-mRNA-1
chr10_pilon_pilon	maker	exon	404109	404191	.	-	.	ID=vitri10g00230-mRNA-1:exon:102;Parent=vitri10g00230-mRNA-1
chr10_pilon_pilon	maker	CDS	404109	404191	.	-	2	ID=vitri10g00230-mRNA-1:cds;Parent=vitri10g00230-mRNA-1
chr10_pilon_pilon	maker	exon	404305	404369	.	-	.	ID=vitri10g00230-mRNA-1:exon:101;Parent=vitri10g00230-mRNA-1
chr10_pilon_pilon	maker	CDS	404305	404369	.	-	1	ID=vitri10g00230-mRNA-1:cds;Parent=vitri10g00230-mRNA-1
chr10_pilon_pilon	maker	exon	404453	404536	.	-	.	ID=vitri10g00230-mRNA-1:exon:100;Parent=vitri10g00230-mRNA-1
chr10_pilon_pilon	maker	CDS	404453	404536	.	-	1	ID=vitri10g00230-mRNA-1:cds;Parent=vitri10g00230-mRNA-1
chr10_pilon_pilon	maker	exon	404627	404692	.	-	.	ID=vitri10g00230-mRNA-1:exon:99;Parent=vitri10g00230-mRNA-1
chr10_pilon_pilon	maker	CDS	404627	404692	.	-	1	ID=vitri10g00230-mRNA-1:cds;Parent=vitri10g00230-mRNA-1
chr10_pilon_pilon	maker	exon	404797	404855	.	-	.	ID=vitri10g00230-mRNA-1:exon:98;Parent=vitri10g00230-mRNA-1
chr10_pilon_pilon	maker	CDS	404797	404855	.	-	0	ID=vitri10g00230-mRNA-1:cds;Parent=vitri10g00230-mRNA-1
chr10_pilon_pilon	maker	exon	405116	405191	.	-	.	ID=vitri10g00230-mRNA-1:exon:97;Parent=vitri10g00230-mRNA-1
chr10_pilon_pilon	maker	CDS	405116	405191	.	-	1	ID=vitri10g00230-mRNA-1:cds;Parent=vitri10g00230-mRNA-1
chr10_pilon_pilon	maker	exon	406852	406955	.	-	.	ID=vitri10g00230-mRNA-1:exon:96;Parent=vitri10g00230-mRNA-1
chr10_pilon_pilon	maker	CDS	406852	406955	.	-	0	ID=vitri10g00230-mRNA-1:cds;Parent=vitri10g00230-mRNA-1
chr10_pilon_pilon	maker	exon	407364	407464	.	-	.	ID=vitri10g00230-mRNA-1:exon:95;Parent=vitri10g00230-mRNA-1
chr10_pilon_pilon	maker	CDS	407364	407464	.	-	2	ID=vitri10g00230-mRNA-1:cds;Parent=vitri10g00230-mRNA-1
chr10_pilon_pilon	maker	exon	407590	407648	.	-	.	ID=vitri10g00230-mRNA-1:exon:94;Parent=vitri10g00230-mRNA-1
chr10_pilon_pilon	maker	CDS	407590	407648	.	-	1	ID=vitri10g00230-mRNA-1:cds;Parent=vitri10g00230-mRNA-1
chr10_pilon_pilon	maker	exon	407823	407987	.	-	.	ID=vitri10g00230-mRNA-1:exon:93;Parent=vitri10g00230-mRNA-1
chr10_pilon_pilon	maker	CDS	407823	407987	.	-	1	ID=vitri10g00230-mRNA-1:cds;Parent=vitri10g00230-mRNA-1
chr10_pilon_pilon	maker	exon	409707	409771	.	-	.	ID=vitri10g00230-mRNA-1:exon:92;Parent=vitri10g00230-mRNA-1
chr10_pilon_pilon	maker	CDS	409707	409771	.	-	0	ID=vitri10g00230-mRNA-1:cds;Parent=vitri10g00230-mRNA-1
chr10_pilon_pilon	maker	exon	409880	410020	.	-	.	ID=vitri10g00230-mRNA-1:exon:91;Parent=vitri10g00230-mRNA-1
chr10_pilon_pilon	maker	CDS	409880	410020	.	-	0	ID=vitri10g00230-mRNA-1:cds;Parent=vitri10g00230-mRNA-1
chr10_pilon_pilon	maker	exon	410149	410201	.	-	.	ID=vitri10g00230-mRNA-1:exon:90;Parent=vitri10g00230-mRNA-1
chr10_pilon_pilon	maker	CDS	410149	410201	.	-	2	ID=vitri10g00230-mRNA-1:cds;Parent=vitri10g00230-mRNA-1
chr10_pilon_pilon	maker	exon	412767	412857	.	-	.	ID=vitri10g00230-mRNA-1:exon:89;Parent=vitri10g00230-mRNA-1
chr10_pilon_pilon	maker	CDS	412767	412857	.	-	0	ID=vitri10g00230-mRNA-1:cds;Parent=vitri10g00230-mRNA-1
chr10_pilon_pilon	maker	exon	412965	413047	.	-	.	ID=vitri10g00230-mRNA-1:exon:88;Parent=vitri10g00230-mRNA-1
chr10_pilon_pilon	maker	CDS	412965	413047	.	-	2	ID=vitri10g00230-mRNA-1:cds;Parent=vitri10g00230-mRNA-1
chr10_pilon_pilon	maker	exon	413221	413285	.	-	.	ID=vitri10g00230-mRNA-1:exon:87;Parent=vitri10g00230-mRNA-1
chr10_pilon_pilon	maker	CDS	413221	413285	.	-	1	ID=vitri10g00230-mRNA-1:cds;Parent=vitri10g00230-mRNA-1
chr10_pilon_pilon	maker	exon	413462	413545	.	-	.	ID=vitri10g00230-mRNA-1:exon:86;Parent=vitri10g00230-mRNA-1
chr10_pilon_pilon	maker	CDS	413462	413545	.	-	1	ID=vitri10g00230-mRNA-1:cds;Parent=vitri10g00230-mRNA-1
chr10_pilon_pilon	maker	exon	413800	413858	.	-	.	ID=vitri10g00230-mRNA-1:exon:85;Parent=vitri10g00230-mRNA-1
chr10_pilon_pilon	maker	CDS	413800	413858	.	-	0	ID=vitri10g00230-mRNA-1:cds;Parent=vitri10g00230-mRNA-1
chr10_pilon_pilon	maker	exon	414003	414078	.	-	.	ID=vitri10g00230-mRNA-1:exon:84;Parent=vitri10g00230-mRNA-1
chr10_pilon_pilon	maker	CDS	414003	414078	.	-	1	ID=vitri10g00230-mRNA-1:cds;Parent=vitri10g00230-mRNA-1
chr10_pilon_pilon	maker	exon	414221	414324	.	-	.	ID=vitri10g00230-mRNA-1:exon:83;Parent=vitri10g00230-mRNA-1
chr10_pilon_pilon	maker	CDS	414221	414324	.	-	0	ID=vitri10g00230-mRNA-1:cds;Parent=vitri10g00230-mRNA-1
chr10_pilon_pilon	maker	exon	415120	415154	.	-	.	ID=vitri10g00230-mRNA-1:exon:82;Parent=vitri10g00230-mRNA-1
chr10_pilon_pilon	maker	CDS	415120	415154	.	-	2	ID=vitri10g00230-mRNA-1:cds;Parent=vitri10g00230-mRNA-1
chr10_pilon_pilon	maker	exon	415240	415296	.	-	.	ID=vitri10g00230-mRNA-1:exon:81;Parent=vitri10g00230-mRNA-1
chr10_pilon_pilon	maker	CDS	415240	415296	.	-	2	ID=vitri10g00230-mRNA-1:cds;Parent=vitri10g00230-mRNA-1
chr10_pilon_pilon	maker	exon	415382	415440	.	-	.	ID=vitri10g00230-mRNA-1:exon:80;Parent=vitri10g00230-mRNA-1
chr10_pilon_pilon	maker	CDS	415382	415440	.	-	1	ID=vitri10g00230-mRNA-1:cds;Parent=vitri10g00230-mRNA-1
chr10_pilon_pilon	maker	CDS	416234	416412	.	-	0	ID=vitri10g00230-mRNA-1:cds;Parent=vitri10g00230-mRNA-1
chr10_pilon_pilon	maker	exon	416234	416475	.	-	.	ID=vitri10g00230-mRNA-1:exon:79;Parent=vitri10g00230-mRNA-1
chr10_pilon_pilon	maker	five_prime_UTR	416413	416475	.	-	.	ID=vitri10g00230-mRNA-1:five_prime_utr;Parent=vitri10g00230-mRNA-1
###
chr10_pilon_pilon	maker	gene	436845	440473	.	-	.	ID=vitri10g00240;Name=vitri10g00240;Note=Similar to AGAL1: Alpha-galactosidase 1 (Arabidopsis thaliana OX%3D3702);Dbxref=CDD:cd14792,Gene3D:G3DSA:2.60.40.1180,Gene3D:G3DSA:3.20.20.70,InterPro:IPR000111,InterPro:IPR002241,InterPro:IPR013780,InterPro:IPR013785,InterPro:IPR017853,PANTHER:PTHR11452,PANTHER:PTHR11452:SF18,PRINTS:PR00740,Pfam:PF16499,ProSitePatterns:PS00512,SUPERFAMILY:SSF51011,SUPERFAMILY:SSF51445,SignalP_EUK:SignalP-TM;Ontology_term=GO:0003824,GO:0004553,GO:0005975
chr10_pilon_pilon	maker	mRNA	436845	440473	.	-	.	ID=vitri10g00240-mRNA-1;Parent=vitri10g00240;Name=vitri10g00240-mRNA-1;_AED=0.18;_eAED=0.18;_QI=191|1|1|1|1|1|15|189|408;Note=Similar to AGAL1: Alpha-galactosidase 1 (Arabidopsis thaliana OX%3D3702);Dbxref=CDD:cd14792,Gene3D:G3DSA:2.60.40.1180,Gene3D:G3DSA:3.20.20.70,InterPro:IPR000111,InterPro:IPR002241,InterPro:IPR013780,InterPro:IPR013785,InterPro:IPR017853,PANTHER:PTHR11452,PANTHER:PTHR11452:SF18,PRINTS:PR00740,Pfam:PF16499,ProSitePatterns:PS00512,SUPERFAMILY:SSF51011,SUPERFAMILY:SSF51445,SignalP_EUK:SignalP-TM;Ontology_term=GO:0003824,GO:0004553,GO:0005975
chr10_pilon_pilon	maker	three_prime_UTR	436845	437033	.	-	.	ID=vitri10g00240-mRNA-1:three_prime_utr;Parent=vitri10g00240-mRNA-1
chr10_pilon_pilon	maker	exon	436845	437126	.	-	.	ID=vitri10g00240-mRNA-1:exon:122;Parent=vitri10g00240-mRNA-1
chr10_pilon_pilon	maker	CDS	437034	437126	.	-	0	ID=vitri10g00240-mRNA-1:cds;Parent=vitri10g00240-mRNA-1
chr10_pilon_pilon	maker	exon	437269	437409	.	-	.	ID=vitri10g00240-mRNA-1:exon:121;Parent=vitri10g00240-mRNA-1
chr10_pilon_pilon	maker	CDS	437269	437409	.	-	0	ID=vitri10g00240-mRNA-1:cds;Parent=vitri10g00240-mRNA-1
chr10_pilon_pilon	maker	exon	437499	437548	.	-	.	ID=vitri10g00240-mRNA-1:exon:120;Parent=vitri10g00240-mRNA-1
chr10_pilon_pilon	maker	CDS	437499	437548	.	-	2	ID=vitri10g00240-mRNA-1:cds;Parent=vitri10g00240-mRNA-1
chr10_pilon_pilon	maker	exon	437649	437739	.	-	.	ID=vitri10g00240-mRNA-1:exon:119;Parent=vitri10g00240-mRNA-1
chr10_pilon_pilon	maker	CDS	437649	437739	.	-	0	ID=vitri10g00240-mRNA-1:cds;Parent=vitri10g00240-mRNA-1
chr10_pilon_pilon	maker	exon	437825	437907	.	-	.	ID=vitri10g00240-mRNA-1:exon:118;Parent=vitri10g00240-mRNA-1
chr10_pilon_pilon	maker	CDS	437825	437907	.	-	2	ID=vitri10g00240-mRNA-1:cds;Parent=vitri10g00240-mRNA-1
chr10_pilon_pilon	maker	exon	438024	438088	.	-	.	ID=vitri10g00240-mRNA-1:exon:117;Parent=vitri10g00240-mRNA-1
chr10_pilon_pilon	maker	CDS	438024	438088	.	-	1	ID=vitri10g00240-mRNA-1:cds;Parent=vitri10g00240-mRNA-1
chr10_pilon_pilon	maker	exon	438177	438260	.	-	.	ID=vitri10g00240-mRNA-1:exon:116;Parent=vitri10g00240-mRNA-1
chr10_pilon_pilon	maker	CDS	438177	438260	.	-	1	ID=vitri10g00240-mRNA-1:cds;Parent=vitri10g00240-mRNA-1
chr10_pilon_pilon	maker	exon	438355	438420	.	-	.	ID=vitri10g00240-mRNA-1:exon:115;Parent=vitri10g00240-mRNA-1
chr10_pilon_pilon	maker	CDS	438355	438420	.	-	1	ID=vitri10g00240-mRNA-1:cds;Parent=vitri10g00240-mRNA-1
chr10_pilon_pilon	maker	exon	438529	438587	.	-	.	ID=vitri10g00240-mRNA-1:exon:114;Parent=vitri10g00240-mRNA-1
chr10_pilon_pilon	maker	CDS	438529	438587	.	-	0	ID=vitri10g00240-mRNA-1:cds;Parent=vitri10g00240-mRNA-1
chr10_pilon_pilon	maker	exon	438741	438816	.	-	.	ID=vitri10g00240-mRNA-1:exon:113;Parent=vitri10g00240-mRNA-1
chr10_pilon_pilon	maker	CDS	438741	438816	.	-	1	ID=vitri10g00240-mRNA-1:cds;Parent=vitri10g00240-mRNA-1
chr10_pilon_pilon	maker	exon	439290	439393	.	-	.	ID=vitri10g00240-mRNA-1:exon:112;Parent=vitri10g00240-mRNA-1
chr10_pilon_pilon	maker	CDS	439290	439393	.	-	0	ID=vitri10g00240-mRNA-1:cds;Parent=vitri10g00240-mRNA-1
chr10_pilon_pilon	maker	exon	439527	439561	.	-	.	ID=vitri10g00240-mRNA-1:exon:111;Parent=vitri10g00240-mRNA-1
chr10_pilon_pilon	maker	CDS	439527	439561	.	-	2	ID=vitri10g00240-mRNA-1:cds;Parent=vitri10g00240-mRNA-1
chr10_pilon_pilon	maker	exon	439653	439709	.	-	.	ID=vitri10g00240-mRNA-1:exon:110;Parent=vitri10g00240-mRNA-1
chr10_pilon_pilon	maker	CDS	439653	439709	.	-	2	ID=vitri10g00240-mRNA-1:cds;Parent=vitri10g00240-mRNA-1
chr10_pilon_pilon	maker	exon	439905	439963	.	-	.	ID=vitri10g00240-mRNA-1:exon:109;Parent=vitri10g00240-mRNA-1
chr10_pilon_pilon	maker	CDS	439905	439963	.	-	1	ID=vitri10g00240-mRNA-1:cds;Parent=vitri10g00240-mRNA-1
chr10_pilon_pilon	maker	CDS	440119	440282	.	-	0	ID=vitri10g00240-mRNA-1:cds;Parent=vitri10g00240-mRNA-1
chr10_pilon_pilon	maker	exon	440119	440473	.	-	.	ID=vitri10g00240-mRNA-1:exon:108;Parent=vitri10g00240-mRNA-1
chr10_pilon_pilon	maker	five_prime_UTR	440283	440473	.	-	.	ID=vitri10g00240-mRNA-1:five_prime_utr;Parent=vitri10g00240-mRNA-1
###
chr10_pilon_pilon	maker	gene	459233	463000	.	+	.	ID=vitri10g00250;Name=vitri10g00250;Note=Protein of unknown function;Dbxref=MobiDBLite:mobidb-lite
chr10_pilon_pilon	maker	mRNA	459233	463000	.	+	.	ID=vitri10g00250-mRNA-1;Parent=vitri10g00250;Name=vitri10g00250-mRNA-1;_AED=0.04;_eAED=0.05;_QI=0|0|0|1|0|0|4|0|263;Note=Protein of unknown function;Dbxref=MobiDBLite:mobidb-lite
chr10_pilon_pilon	maker	exon	459233	459496	.	+	.	ID=vitri10g00250-mRNA-1:exon:123;Parent=vitri10g00250-mRNA-1
chr10_pilon_pilon	maker	CDS	459233	459496	.	+	0	ID=vitri10g00250-mRNA-1:cds;Parent=vitri10g00250-mRNA-1
chr10_pilon_pilon	maker	exon	459547	459740	.	+	.	ID=vitri10g00250-mRNA-1:exon:124;Parent=vitri10g00250-mRNA-1
chr10_pilon_pilon	maker	CDS	459547	459740	.	+	0	ID=vitri10g00250-mRNA-1:cds;Parent=vitri10g00250-mRNA-1
chr10_pilon_pilon	maker	exon	461176	461282	.	+	.	ID=vitri10g00250-mRNA-1:exon:125;Parent=vitri10g00250-mRNA-1
chr10_pilon_pilon	maker	CDS	461176	461282	.	+	1	ID=vitri10g00250-mRNA-1:cds;Parent=vitri10g00250-mRNA-1
chr10_pilon_pilon	maker	exon	462774	463000	.	+	.	ID=vitri10g00250-mRNA-1:exon:126;Parent=vitri10g00250-mRNA-1
chr10_pilon_pilon	maker	CDS	462774	463000	.	+	2	ID=vitri10g00250-mRNA-1:cds;Parent=vitri10g00250-mRNA-1
###
chr10_pilon_pilon	maker	gene	476759	477654	.	-	.	ID=vitri10g00260;Name=vitri10g00260;Note=Protein of unknown function;Dbxref=InterPro:IPR006747,PANTHER:PTHR31168,PANTHER:PTHR31168:SF3,Pfam:PF04654
chr10_pilon_pilon	maker	mRNA	476759	477654	.	-	.	ID=vitri10g00260-mRNA-1;Parent=vitri10g00260;Name=vitri10g00260-mRNA-1;_AED=0.03;_eAED=0.03;_QI=0|0|0|1|1|1|2|0|239;Note=Protein of unknown function;Dbxref=InterPro:IPR006747,PANTHER:PTHR31168,PANTHER:PTHR31168:SF3,Pfam:PF04654
chr10_pilon_pilon	maker	exon	476759	477316	.	-	.	ID=vitri10g00260-mRNA-1:exon:77;Parent=vitri10g00260-mRNA-1
chr10_pilon_pilon	maker	CDS	476759	477316	.	-	0	ID=vitri10g00260-mRNA-1:cds;Parent=vitri10g00260-mRNA-1
chr10_pilon_pilon	maker	exon	477493	477654	.	-	.	ID=vitri10g00260-mRNA-1:exon:78;Parent=vitri10g00260-mRNA-1
chr10_pilon_pilon	maker	CDS	477493	477654	.	-	0	ID=vitri10g00260-mRNA-1:cds;Parent=vitri10g00260-mRNA-1
###
chr10_pilon_pilon	maker	gene	496243	497800	.	-	.	ID=vitri10g00270;Name=vitri10g00270;Note=Protein of unknown function;Dbxref=InterPro:IPR006747,PANTHER:PTHR31168,PANTHER:PTHR31168:SF3,Pfam:PF04654
chr10_pilon_pilon	maker	mRNA	496243	497800	.	-	.	ID=vitri10g00270-mRNA-1;Parent=vitri10g00270;Name=vitri10g00270-mRNA-1;_AED=0.05;_eAED=0.05;_QI=456|1|1|1|1|1|2|198|244;Note=Protein of unknown function;Dbxref=InterPro:IPR006747,PANTHER:PTHR31168,PANTHER:PTHR31168:SF3,Pfam:PF04654
chr10_pilon_pilon	maker	three_prime_UTR	496243	496440	.	-	.	ID=vitri10g00270-mRNA-1:three_prime_utr;Parent=vitri10g00270-mRNA-1
chr10_pilon_pilon	maker	exon	496243	497013	.	-	.	ID=vitri10g00270-mRNA-1:exon:145;Parent=vitri10g00270-mRNA-1
chr10_pilon_pilon	maker	CDS	496441	497013	.	-	0	ID=vitri10g00270-mRNA-1:cds;Parent=vitri10g00270-mRNA-1
chr10_pilon_pilon	maker	CDS	497183	497344	.	-	0	ID=vitri10g00270-mRNA-1:cds;Parent=vitri10g00270-mRNA-1
chr10_pilon_pilon	maker	exon	497183	497800	.	-	.	ID=vitri10g00270-mRNA-1:exon:144;Parent=vitri10g00270-mRNA-1
chr10_pilon_pilon	maker	five_prime_UTR	497345	497800	.	-	.	ID=vitri10g00270-mRNA-1:five_prime_utr;Parent=vitri10g00270-mRNA-1
###
chr10_pilon_pilon	maker	gene	499549	500008	.	+	.	ID=vitri10g00280;Name=vitri10g00280;Note=Protein of unknown function
chr10_pilon_pilon	maker	mRNA	499549	500008	.	+	.	ID=vitri10g00280-mRNA-1;Parent=vitri10g00280;Name=vitri10g00280-mRNA-1;_AED=0.31;_eAED=0.32;_QI=0|0|0|1|0|0|2|0|123;Note=Protein of unknown function
chr10_pilon_pilon	maker	exon	499549	499593	.	+	.	ID=vitri10g00280-mRNA-1:exon:161;Parent=vitri10g00280-mRNA-1
chr10_pilon_pilon	maker	CDS	499549	499593	.	+	0	ID=vitri10g00280-mRNA-1:cds;Parent=vitri10g00280-mRNA-1
chr10_pilon_pilon	maker	exon	499682	500008	.	+	.	ID=vitri10g00280-mRNA-1:exon:162;Parent=vitri10g00280-mRNA-1
chr10_pilon_pilon	maker	CDS	499682	500008	.	+	0	ID=vitri10g00280-mRNA-1:cds;Parent=vitri10g00280-mRNA-1
###
chr10_pilon_pilon	maker	gene	503056	509824	.	-	.	ID=vitri10g00290;Name=vitri10g00290;Note=Similar to Pyruvate kinase%2C cytosolic isozyme (Glycine max OX%3D3847);Dbxref=CDD:cd00288,Gene3D:G3DSA:2.40.33.10,Gene3D:G3DSA:3.20.20.60,Gene3D:G3DSA:3.40.1380.20,InterPro:IPR001697,InterPro:IPR011037,InterPro:IPR015793,InterPro:IPR015795,InterPro:IPR015806,InterPro:IPR015813,InterPro:IPR018209,InterPro:IPR036918,PANTHER:PTHR11817,PANTHER:PTHR11817:SF5,PRINTS:PR01050,Pfam:PF00224,Pfam:PF02887,ProSitePatterns:PS00110,SUPERFAMILY:SSF50800,SUPERFAMILY:SSF51621,SUPERFAMILY:SSF52935,TIGRFAM:TIGR01064;Ontology_term=GO:0000287,GO:0003824,GO:0004743,GO:0006096,GO:0030955
chr10_pilon_pilon	maker	mRNA	503056	509824	.	-	.	ID=vitri10g00290-mRNA-1;Parent=vitri10g00290;Name=vitri10g00290-mRNA-1;_AED=0.10;_eAED=0.10;_QI=53|0.5|0.2|0.8|0.5|0.6|5|0|542;Note=Similar to Pyruvate kinase%2C cytosolic isozyme (Glycine max OX%3D3847);Dbxref=CDD:cd00288,Gene3D:G3DSA:2.40.33.10,Gene3D:G3DSA:3.20.20.60,Gene3D:G3DSA:3.40.1380.20,InterPro:IPR001697,InterPro:IPR011037,InterPro:IPR015793,InterPro:IPR015795,InterPro:IPR015806,InterPro:IPR015813,InterPro:IPR018209,InterPro:IPR036918,PANTHER:PTHR11817,PANTHER:PTHR11817:SF5,PRINTS:PR01050,Pfam:PF00224,Pfam:PF02887,ProSitePatterns:PS00110,SUPERFAMILY:SSF50800,SUPERFAMILY:SSF51621,SUPERFAMILY:SSF52935,TIGRFAM:TIGR01064;Ontology_term=GO:0000287,GO:0003824,GO:0004743,GO:0006096,GO:0030955
chr10_pilon_pilon	maker	exon	503056	503071	.	-	.	ID=vitri10g00290-mRNA-1:exon:154;Parent=vitri10g00290-mRNA-1
chr10_pilon_pilon	maker	CDS	503056	503071	.	-	1	ID=vitri10g00290-mRNA-1:cds;Parent=vitri10g00290-mRNA-1
chr10_pilon_pilon	maker	exon	503600	503685	.	-	.	ID=vitri10g00290-mRNA-1:exon:153;Parent=vitri10g00290-mRNA-1
chr10_pilon_pilon	maker	CDS	503600	503685	.	-	0	ID=vitri10g00290-mRNA-1:cds;Parent=vitri10g00290-mRNA-1
chr10_pilon_pilon	maker	exon	504143	504946	.	-	.	ID=vitri10g00290-mRNA-1:exon:152;Parent=vitri10g00290-mRNA-1
chr10_pilon_pilon	maker	CDS	504143	504946	.	-	0	ID=vitri10g00290-mRNA-1:cds;Parent=vitri10g00290-mRNA-1
chr10_pilon_pilon	maker	exon	505838	506299	.	-	.	ID=vitri10g00290-mRNA-1:exon:151;Parent=vitri10g00290-mRNA-1
chr10_pilon_pilon	maker	CDS	505838	506299	.	-	0	ID=vitri10g00290-mRNA-1:cds;Parent=vitri10g00290-mRNA-1
chr10_pilon_pilon	maker	CDS	509514	509771	.	-	0	ID=vitri10g00290-mRNA-1:cds;Parent=vitri10g00290-mRNA-1
chr10_pilon_pilon	maker	exon	509514	509824	.	-	.	ID=vitri10g00290-mRNA-1:exon:150;Parent=vitri10g00290-mRNA-1
chr10_pilon_pilon	maker	five_prime_UTR	509772	509824	.	-	.	ID=vitri10g00290-mRNA-1:five_prime_utr;Parent=vitri10g00290-mRNA-1
###
chr10_pilon_pilon	maker	gene	534601	535404	.	-	.	ID=vitri10g00300;Name=vitri10g00300;Note=Protein of unknown function
chr10_pilon_pilon	maker	mRNA	534601	535404	.	-	.	ID=vitri10g00300-mRNA-1;Parent=vitri10g00300;Name=vitri10g00300-mRNA-1;_AED=0.21;_eAED=0.26;_QI=0|0|0|1|0|0|3|0|146;Note=Protein of unknown function
chr10_pilon_pilon	maker	exon	534601	534708	.	-	.	ID=vitri10g00300-mRNA-1:exon:158;Parent=vitri10g00300-mRNA-1
chr10_pilon_pilon	maker	CDS	534601	534708	.	-	0	ID=vitri10g00300-mRNA-1:cds;Parent=vitri10g00300-mRNA-1
chr10_pilon_pilon	maker	exon	534759	534872	.	-	.	ID=vitri10g00300-mRNA-1:exon:159;Parent=vitri10g00300-mRNA-1
chr10_pilon_pilon	maker	CDS	534759	534872	.	-	0	ID=vitri10g00300-mRNA-1:cds;Parent=vitri10g00300-mRNA-1
chr10_pilon_pilon	maker	exon	535189	535404	.	-	.	ID=vitri10g00300-mRNA-1:exon:160;Parent=vitri10g00300-mRNA-1
chr10_pilon_pilon	maker	CDS	535189	535404	.	-	0	ID=vitri10g00300-mRNA-1:cds;Parent=vitri10g00300-mRNA-1
###
chr10_pilon_pilon	maker	gene	549255	550571	.	+	.	ID=vitri10g00310;Name=vitri10g00310;Note=Protein of unknown function
chr10_pilon_pilon	maker	mRNA	549255	550571	.	+	.	ID=vitri10g00310-mRNA-1;Parent=vitri10g00310;Name=vitri10g00310-mRNA-1;_AED=0.30;_eAED=0.38;_QI=31|0|0|1|0|0|3|0|164;Note=Protein of unknown function
chr10_pilon_pilon	maker	five_prime_UTR	549255	549285	.	+	.	ID=vitri10g00310-mRNA-1:five_prime_utr;Parent=vitri10g00310-mRNA-1
chr10_pilon_pilon	maker	exon	549255	549378	.	+	.	ID=vitri10g00310-mRNA-1:exon:155;Parent=vitri10g00310-mRNA-1
chr10_pilon_pilon	maker	CDS	549286	549378	.	+	0	ID=vitri10g00310-mRNA-1:cds;Parent=vitri10g00310-mRNA-1
chr10_pilon_pilon	maker	exon	549490	549666	.	+	.	ID=vitri10g00310-mRNA-1:exon:156;Parent=vitri10g00310-mRNA-1
chr10_pilon_pilon	maker	CDS	549490	549666	.	+	0	ID=vitri10g00310-mRNA-1:cds;Parent=vitri10g00310-mRNA-1
chr10_pilon_pilon	maker	exon	550350	550571	.	+	.	ID=vitri10g00310-mRNA-1:exon:157;Parent=vitri10g00310-mRNA-1
chr10_pilon_pilon	maker	CDS	550350	550571	.	+	0	ID=vitri10g00310-mRNA-1:cds;Parent=vitri10g00310-mRNA-1
###
chr10_pilon_pilon	maker	gene	574367	579120	.	-	.	ID=vitri10g00320;Name=vitri10g00320;Note=Similar to At5g63670: Transcription elongation factor SPT4 homolog 2 (Arabidopsis thaliana OX%3D3702);Dbxref=CDD:cd07973,Gene3D:G3DSA:3.30.40.210,InterPro:IPR009287,InterPro:IPR022800,InterPro:IPR029040,InterPro:IPR038510,PANTHER:PTHR12882,PANTHER:PTHR12882:SF3,PIRSF:PIRSF025023,Pfam:PF06093,SMART:SM01389,SUPERFAMILY:SSF63393;Ontology_term=GO:0005634,GO:0006355,GO:0008270,GO:0032786
chr10_pilon_pilon	maker	mRNA	574367	579120	.	-	.	ID=vitri10g00320-mRNA-1;Parent=vitri10g00320;Name=vitri10g00320-mRNA-1;_AED=0.07;_eAED=0.07;_QI=211|1|1|1|1|1|4|488|148;Note=Similar to At5g63670: Transcription elongation factor SPT4 homolog 2 (Arabidopsis thaliana OX%3D3702);Dbxref=CDD:cd07973,Gene3D:G3DSA:3.30.40.210,InterPro:IPR009287,InterPro:IPR022800,InterPro:IPR029040,InterPro:IPR038510,PANTHER:PTHR12882,PANTHER:PTHR12882:SF3,PIRSF:PIRSF025023,Pfam:PF06093,SMART:SM01389,SUPERFAMILY:SSF63393;Ontology_term=GO:0005634,GO:0006355,GO:0008270,GO:0032786
chr10_pilon_pilon	maker	three_prime_UTR	574367	574854	.	-	.	ID=vitri10g00320-mRNA-1:three_prime_utr;Parent=vitri10g00320-mRNA-1
chr10_pilon_pilon	maker	exon	574367	574902	.	-	.	ID=vitri10g00320-mRNA-1:exon:149;Parent=vitri10g00320-mRNA-1
chr10_pilon_pilon	maker	CDS	574855	574902	.	-	0	ID=vitri10g00320-mRNA-1:cds;Parent=vitri10g00320-mRNA-1
chr10_pilon_pilon	maker	exon	575904	575965	.	-	.	ID=vitri10g00320-mRNA-1:exon:148;Parent=vitri10g00320-mRNA-1
chr10_pilon_pilon	maker	CDS	575904	575965	.	-	2	ID=vitri10g00320-mRNA-1:cds;Parent=vitri10g00320-mRNA-1
chr10_pilon_pilon	maker	exon	578360	578415	.	-	.	ID=vitri10g00320-mRNA-1:exon:147;Parent=vitri10g00320-mRNA-1
chr10_pilon_pilon	maker	CDS	578360	578415	.	-	1	ID=vitri10g00320-mRNA-1:cds;Parent=vitri10g00320-mRNA-1
chr10_pilon_pilon	maker	CDS	578629	578909	.	-	0	ID=vitri10g00320-mRNA-1:cds;Parent=vitri10g00320-mRNA-1
chr10_pilon_pilon	maker	exon	578629	579120	.	-	.	ID=vitri10g00320-mRNA-1:exon:146;Parent=vitri10g00320-mRNA-1
chr10_pilon_pilon	maker	five_prime_UTR	578910	579120	.	-	.	ID=vitri10g00320-mRNA-1:five_prime_utr;Parent=vitri10g00320-mRNA-1
###
chr10_pilon_pilon	maker	gene	579985	592372	.	-	.	ID=vitri10g00330;Name=vitri10g00330;Note=Similar to WDR26: WD repeat-containing protein 26 homolog (Arabidopsis thaliana OX%3D3702);Dbxref=Gene3D:G3DSA:2.130.10.10,InterPro:IPR001680,InterPro:IPR006594,InterPro:IPR006595,InterPro:IPR015943,InterPro:IPR017986,InterPro:IPR019775,InterPro:IPR020472,InterPro:IPR036322,MobiDBLite:mobidb-lite,PANTHER:PTHR22838,PANTHER:PTHR22838:SF6,PRINTS:PR00320,Pfam:PF00400,ProSitePatterns:PS00678,ProSiteProfiles:PS50082,ProSiteProfiles:PS50294,ProSiteProfiles:PS50896,ProSiteProfiles:PS50897,SMART:SM00320,SMART:SM00668,SUPERFAMILY:SSF50978;Ontology_term=GO:0005515
chr10_pilon_pilon	maker	mRNA	579985	592372	.	-	.	ID=vitri10g00330-mRNA-1;Parent=vitri10g00330;Name=vitri10g00330-mRNA-1;_AED=0.04;_eAED=0.04;_QI=310|0.66|0.75|1|0.66|0.5|4|269|552;Note=Similar to WDR26: WD repeat-containing protein 26 homolog (Arabidopsis thaliana OX%3D3702);Dbxref=Gene3D:G3DSA:2.130.10.10,InterPro:IPR001680,InterPro:IPR006594,InterPro:IPR006595,InterPro:IPR015943,InterPro:IPR017986,InterPro:IPR019775,InterPro:IPR020472,InterPro:IPR036322,MobiDBLite:mobidb-lite,PANTHER:PTHR22838,PANTHER:PTHR22838:SF6,PRINTS:PR00320,Pfam:PF00400,ProSitePatterns:PS00678,ProSiteProfiles:PS50082,ProSiteProfiles:PS50294,ProSiteProfiles:PS50896,ProSiteProfiles:PS50897,SMART:SM00320,SMART:SM00668,SUPERFAMILY:SSF50978;Ontology_term=GO:0005515
chr10_pilon_pilon	maker	three_prime_UTR	579985	580253	.	-	.	ID=vitri10g00330-mRNA-1:three_prime_utr;Parent=vitri10g00330-mRNA-1
chr10_pilon_pilon	maker	exon	579985	580472	.	-	.	ID=vitri10g00330-mRNA-1:exon:142;Parent=vitri10g00330-mRNA-1
chr10_pilon_pilon	maker	CDS	580254	580472	.	-	0	ID=vitri10g00330-mRNA-1:cds;Parent=vitri10g00330-mRNA-1
chr10_pilon_pilon	maker	exon	582146	582775	.	-	.	ID=vitri10g00330-mRNA-1:exon:141;Parent=vitri10g00330-mRNA-1
chr10_pilon_pilon	maker	CDS	582146	582775	.	-	0	ID=vitri10g00330-mRNA-1:cds;Parent=vitri10g00330-mRNA-1
chr10_pilon_pilon	maker	CDS	590414	591223	.	-	0	ID=vitri10g00330-mRNA-1:cds;Parent=vitri10g00330-mRNA-1
chr10_pilon_pilon	maker	exon	590414	591251	.	-	.	ID=vitri10g00330-mRNA-1:exon:140;Parent=vitri10g00330-mRNA-1
chr10_pilon_pilon	maker	five_prime_UTR	591224	591251	.	-	.	ID=vitri10g00330-mRNA-1:five_prime_utr;Parent=vitri10g00330-mRNA-1
chr10_pilon_pilon	maker	exon	592091	592372	.	-	.	ID=vitri10g00330-mRNA-1:exon:139;Parent=vitri10g00330-mRNA-1
chr10_pilon_pilon	maker	five_prime_UTR	592091	592372	.	-	.	ID=vitri10g00330-mRNA-1:five_prime_utr;Parent=vitri10g00330-mRNA-1
###
chr10_pilon_pilon	maker	gene	593204	600403	.	-	.	ID=vitri10g00340;Name=vitri10g00340;Note=Similar to LIP1P: Lipoyl synthase%2C chloroplastic (Ricinus communis OX%3D3988);Dbxref=CDD:cd01335,Gene3D:G3DSA:3.20.20.70,InterPro:IPR003698,InterPro:IPR006638,InterPro:IPR007197,InterPro:IPR013785,InterPro:IPR027526,InterPro:IPR031691,MobiDBLite:mobidb-lite,PANTHER:PTHR10949,PANTHER:PTHR10949:SF14,PIRSF:PIRSF005963,Pfam:PF04055,Pfam:PF16881,SFLD:SFLDF00271,SFLD:SFLDG01058,SFLD:SFLDS00029,SMART:SM00729,SUPERFAMILY:SSF102114,TIGRFAM:TIGR00510;Ontology_term=GO:0003824,GO:0009107,GO:0009507,GO:0016992,GO:0051536,GO:0051539
chr10_pilon_pilon	maker	mRNA	593204	600403	.	-	.	ID=vitri10g00340-mRNA-1;Parent=vitri10g00340;Name=vitri10g00340-mRNA-1;_AED=0.07;_eAED=0.08;_QI=0|1|0.85|1|1|1|7|196|377;Note=Similar to LIP1P: Lipoyl synthase%2C chloroplastic (Ricinus communis OX%3D3988);Dbxref=CDD:cd01335,Gene3D:G3DSA:3.20.20.70,InterPro:IPR003698,InterPro:IPR006638,InterPro:IPR007197,InterPro:IPR013785,InterPro:IPR027526,InterPro:IPR031691,MobiDBLite:mobidb-lite,PANTHER:PTHR10949,PANTHER:PTHR10949:SF14,PIRSF:PIRSF005963,Pfam:PF04055,Pfam:PF16881,SFLD:SFLDF00271,SFLD:SFLDG01058,SFLD:SFLDS00029,SMART:SM00729,SUPERFAMILY:SSF102114,TIGRFAM:TIGR00510;Ontology_term=GO:0003824,GO:0009107,GO:0009507,GO:0016992,GO:0051536,GO:0051539
chr10_pilon_pilon	maker	three_prime_UTR	593204	593399	.	-	.	ID=vitri10g00340-mRNA-1:three_prime_utr;Parent=vitri10g00340-mRNA-1
chr10_pilon_pilon	maker	exon	593204	593477	.	-	.	ID=vitri10g00340-mRNA-1:exon:160;Parent=vitri10g00340-mRNA-1
chr10_pilon_pilon	maker	CDS	593400	593477	.	-	0	ID=vitri10g00340-mRNA-1:cds;Parent=vitri10g00340-mRNA-1
chr10_pilon_pilon	maker	exon	593854	593964	.	-	.	ID=vitri10g00340-mRNA-1:exon:159;Parent=vitri10g00340-mRNA-1
chr10_pilon_pilon	maker	CDS	593854	593964	.	-	0	ID=vitri10g00340-mRNA-1:cds;Parent=vitri10g00340-mRNA-1
chr10_pilon_pilon	maker	exon	594264	594435	.	-	.	ID=vitri10g00340-mRNA-1:exon:158;Parent=vitri10g00340-mRNA-1
chr10_pilon_pilon	maker	CDS	594264	594435	.	-	1	ID=vitri10g00340-mRNA-1:cds;Parent=vitri10g00340-mRNA-1
chr10_pilon_pilon	maker	exon	597996	598153	.	-	.	ID=vitri10g00340-mRNA-1:exon:157;Parent=vitri10g00340-mRNA-1
chr10_pilon_pilon	maker	CDS	597996	598153	.	-	0	ID=vitri10g00340-mRNA-1:cds;Parent=vitri10g00340-mRNA-1
chr10_pilon_pilon	maker	exon	598249	598339	.	-	.	ID=vitri10g00340-mRNA-1:exon:156;Parent=vitri10g00340-mRNA-1
chr10_pilon_pilon	maker	CDS	598249	598339	.	-	1	ID=vitri10g00340-mRNA-1:cds;Parent=vitri10g00340-mRNA-1
chr10_pilon_pilon	maker	exon	598797	598960	.	-	.	ID=vitri10g00340-mRNA-1:exon:155;Parent=vitri10g00340-mRNA-1
chr10_pilon_pilon	maker	CDS	598797	598960	.	-	0	ID=vitri10g00340-mRNA-1:cds;Parent=vitri10g00340-mRNA-1
chr10_pilon_pilon	maker	exon	600044	600403	.	-	.	ID=vitri10g00340-mRNA-1:exon:154;Parent=vitri10g00340-mRNA-1
chr10_pilon_pilon	maker	CDS	600044	600403	.	-	0	ID=vitri10g00340-mRNA-1:cds;Parent=vitri10g00340-mRNA-1
###
chr10_pilon_pilon	maker	gene	601909	609118	.	-	.	ID=vitri10g00350;Name=vitri10g00350;Note=Protein of unknown function;Dbxref=MobiDBLite:mobidb-lite,PANTHER:PTHR36793
chr10_pilon_pilon	maker	mRNA	601909	609118	.	-	.	ID=vitri10g00350-mRNA-1;Parent=vitri10g00350;Name=vitri10g00350-mRNA-1;_AED=0.07;_eAED=0.07;_QI=51|1|1|1|1|1|6|480|344;Note=Protein of unknown function;Dbxref=MobiDBLite:mobidb-lite,PANTHER:PTHR36793
chr10_pilon_pilon	maker	three_prime_UTR	601909	602388	.	-	.	ID=vitri10g00350-mRNA-1:three_prime_utr;Parent=vitri10g00350-mRNA-1
chr10_pilon_pilon	maker	exon	601909	602524	.	-	.	ID=vitri10g00350-mRNA-1:exon:153;Parent=vitri10g00350-mRNA-1
chr10_pilon_pilon	maker	CDS	602389	602524	.	-	1	ID=vitri10g00350-mRNA-1:cds;Parent=vitri10g00350-mRNA-1
chr10_pilon_pilon	maker	exon	602606	602667	.	-	.	ID=vitri10g00350-mRNA-1:exon:152;Parent=vitri10g00350-mRNA-1
chr10_pilon_pilon	maker	CDS	602606	602667	.	-	0	ID=vitri10g00350-mRNA-1:cds;Parent=vitri10g00350-mRNA-1
chr10_pilon_pilon	maker	exon	604550	604647	.	-	.	ID=vitri10g00350-mRNA-1:exon:151;Parent=vitri10g00350-mRNA-1
chr10_pilon_pilon	maker	CDS	604550	604647	.	-	2	ID=vitri10g00350-mRNA-1:cds;Parent=vitri10g00350-mRNA-1
chr10_pilon_pilon	maker	exon	606284	606461	.	-	.	ID=vitri10g00350-mRNA-1:exon:150;Parent=vitri10g00350-mRNA-1
chr10_pilon_pilon	maker	CDS	606284	606461	.	-	0	ID=vitri10g00350-mRNA-1:cds;Parent=vitri10g00350-mRNA-1
chr10_pilon_pilon	maker	exon	607550	607648	.	-	.	ID=vitri10g00350-mRNA-1:exon:149;Parent=vitri10g00350-mRNA-1
chr10_pilon_pilon	maker	CDS	607550	607648	.	-	0	ID=vitri10g00350-mRNA-1:cds;Parent=vitri10g00350-mRNA-1
chr10_pilon_pilon	maker	CDS	608606	609067	.	-	0	ID=vitri10g00350-mRNA-1:cds;Parent=vitri10g00350-mRNA-1
chr10_pilon_pilon	maker	exon	608606	609118	.	-	.	ID=vitri10g00350-mRNA-1:exon:148;Parent=vitri10g00350-mRNA-1
chr10_pilon_pilon	maker	five_prime_UTR	609068	609118	.	-	.	ID=vitri10g00350-mRNA-1:five_prime_utr;Parent=vitri10g00350-mRNA-1
###
chr10_pilon_pilon	maker	gene	658970	661078	.	-	.	ID=vitri10g00360;Name=vitri10g00360;Note=Similar to MIA40: Mitochondrial intermembrane space import and assembly protein 40 homolog (Arabidopsis thaliana OX%3D3702);Dbxref=InterPro:IPR010625,MobiDBLite:mobidb-lite,PANTHER:PTHR21622,PANTHER:PTHR21622:SF0,Pfam:PF06747
chr10_pilon_pilon	maker	mRNA	658970	661078	.	-	.	ID=vitri10g00360-mRNA-1;Parent=vitri10g00360;Name=vitri10g00360-mRNA-1;_AED=0.06;_eAED=0.06;_QI=224|1|1|1|0.75|0.6|5|189|141;Note=Similar to MIA40: Mitochondrial intermembrane space import and assembly protein 40 homolog (Arabidopsis thaliana OX%3D3702);Dbxref=InterPro:IPR010625,MobiDBLite:mobidb-lite,PANTHER:PTHR21622,PANTHER:PTHR21622:SF0,Pfam:PF06747
chr10_pilon_pilon	maker	three_prime_UTR	658970	659158	.	-	.	ID=vitri10g00360-mRNA-1:three_prime_utr;Parent=vitri10g00360-mRNA-1
chr10_pilon_pilon	maker	exon	658970	659341	.	-	.	ID=vitri10g00360-mRNA-1:exon:147;Parent=vitri10g00360-mRNA-1
chr10_pilon_pilon	maker	CDS	659159	659341	.	-	0	ID=vitri10g00360-mRNA-1:cds;Parent=vitri10g00360-mRNA-1
chr10_pilon_pilon	maker	exon	660407	660532	.	-	.	ID=vitri10g00360-mRNA-1:exon:146;Parent=vitri10g00360-mRNA-1
chr10_pilon_pilon	maker	CDS	660407	660532	.	-	0	ID=vitri10g00360-mRNA-1:cds;Parent=vitri10g00360-mRNA-1
chr10_pilon_pilon	maker	exon	660616	660647	.	-	.	ID=vitri10g00360-mRNA-1:exon:145;Parent=vitri10g00360-mRNA-1
chr10_pilon_pilon	maker	CDS	660616	660647	.	-	2	ID=vitri10g00360-mRNA-1:cds;Parent=vitri10g00360-mRNA-1
chr10_pilon_pilon	maker	CDS	660750	660834	.	-	0	ID=vitri10g00360-mRNA-1:cds;Parent=vitri10g00360-mRNA-1
chr10_pilon_pilon	maker	exon	660750	660928	.	-	.	ID=vitri10g00360-mRNA-1:exon:144;Parent=vitri10g00360-mRNA-1
chr10_pilon_pilon	maker	five_prime_UTR	660835	660928	.	-	.	ID=vitri10g00360-mRNA-1:five_prime_utr;Parent=vitri10g00360-mRNA-1
chr10_pilon_pilon	maker	exon	660949	661078	.	-	.	ID=vitri10g00360-mRNA-1:exon:143;Parent=vitri10g00360-mRNA-1
chr10_pilon_pilon	maker	five_prime_UTR	660949	661078	.	-	.	ID=vitri10g00360-mRNA-1:five_prime_utr;Parent=vitri10g00360-mRNA-1
###
chr10_pilon_pilon	maker	gene	661412	675116	.	+	.	ID=vitri10g00370;Name=vitri10g00370;Note=Protein of unknown function;Dbxref=InterPro:IPR006927,PANTHER:PTHR31860,PANTHER:PTHR31860:SF4,Pfam:PF04842
chr10_pilon_pilon	maker	mRNA	661412	669420	.	+	.	ID=vitri10g00370-mRNA-3;Parent=vitri10g00370;Name=vitri10g00370-mRNA-3;_AED=0.23;_eAED=0.25;_QI=83|0.7|0.54|1|0.7|0.72|11|0|599;Note=Protein of unknown function;Dbxref=InterPro:IPR006927,PANTHER:PTHR31860,PANTHER:PTHR31860:SF4,Pfam:PF04842
chr10_pilon_pilon	maker	five_prime_UTR	661412	661494	.	+	.	ID=vitri10g00370-mRNA-3:five_prime_utr;Parent=vitri10g00370-mRNA-3
chr10_pilon_pilon	maker	CDS	661495	661694	.	+	0	ID=vitri10g00370-mRNA-3:cds;Parent=vitri10g00370-mRNA-3
chr10_pilon_pilon	maker	CDS	662560	662794	.	+	1	ID=vitri10g00370-mRNA-3:cds;Parent=vitri10g00370-mRNA-3
chr10_pilon_pilon	maker	CDS	662985	663071	.	+	0	ID=vitri10g00370-mRNA-3:cds;Parent=vitri10g00370-mRNA-3
chr10_pilon_pilon	maker	CDS	663211	663380	.	+	0	ID=vitri10g00370-mRNA-3:cds;Parent=vitri10g00370-mRNA-3
chr10_pilon_pilon	maker	CDS	665710	665852	.	+	1	ID=vitri10g00370-mRNA-3:cds;Parent=vitri10g00370-mRNA-3
chr10_pilon_pilon	maker	CDS	666476	666504	.	+	2	ID=vitri10g00370-mRNA-3:cds;Parent=vitri10g00370-mRNA-3
chr10_pilon_pilon	maker	CDS	666515	666654	.	+	0	ID=vitri10g00370-mRNA-3:cds;Parent=vitri10g00370-mRNA-3
chr10_pilon_pilon	maker	CDS	666739	667336	.	+	1	ID=vitri10g00370-mRNA-3:cds;Parent=vitri10g00370-mRNA-3
chr10_pilon_pilon	maker	exon	667972	668073	.	+	.	ID=vitri10g00370-mRNA-3:exon:131;Parent=vitri10g00370-mRNA-3
chr10_pilon_pilon	maker	CDS	667972	668073	.	+	0	ID=vitri10g00370-mRNA-3:cds;Parent=vitri10g00370-mRNA-3
chr10_pilon_pilon	maker	exon	669290	669340	.	+	.	ID=vitri10g00370-mRNA-3:exon:132;Parent=vitri10g00370-mRNA-3
chr10_pilon_pilon	maker	CDS	669290	669340	.	+	0	ID=vitri10g00370-mRNA-3:cds;Parent=vitri10g00370-mRNA-3
chr10_pilon_pilon	maker	exon	669376	669420	.	+	.	ID=vitri10g00370-mRNA-3:exon:133;Parent=vitri10g00370-mRNA-3
chr10_pilon_pilon	maker	CDS	669376	669420	.	+	0	ID=vitri10g00370-mRNA-3:cds;Parent=vitri10g00370-mRNA-3
chr10_pilon_pilon	maker	mRNA	661412	675116	.	+	.	ID=vitri10g00370-mRNA-1;Parent=vitri10g00370;Name=vitri10g00370-mRNA-1;_AED=0.08;_eAED=0.08;_QI=83|0.92|0.85|1|0.61|0.57|14|707|728;Note=Protein of unknown function;Dbxref=InterPro:IPR006927,PANTHER:PTHR31860,PANTHER:PTHR31860:SF4,Pfam:PF04842
chr10_pilon_pilon	maker	five_prime_UTR	661412	661494	.	+	.	ID=vitri10g00370-mRNA-1:five_prime_utr;Parent=vitri10g00370-mRNA-1
chr10_pilon_pilon	maker	CDS	661495	661694	.	+	0	ID=vitri10g00370-mRNA-1:cds;Parent=vitri10g00370-mRNA-1
chr10_pilon_pilon	maker	CDS	662560	662794	.	+	1	ID=vitri10g00370-mRNA-1:cds;Parent=vitri10g00370-mRNA-1
chr10_pilon_pilon	maker	CDS	662985	663071	.	+	0	ID=vitri10g00370-mRNA-1:cds;Parent=vitri10g00370-mRNA-1
chr10_pilon_pilon	maker	CDS	663211	663380	.	+	0	ID=vitri10g00370-mRNA-1:cds;Parent=vitri10g00370-mRNA-1
chr10_pilon_pilon	maker	CDS	665710	665852	.	+	1	ID=vitri10g00370-mRNA-1:cds;Parent=vitri10g00370-mRNA-1
chr10_pilon_pilon	maker	exon	666476	666504	.	+	.	ID=vitri10g00370-mRNA-1:exon:121;Parent=vitri10g00370-mRNA-3,vitri10g00370-mRNA-1
chr10_pilon_pilon	maker	CDS	666476	666504	.	+	2	ID=vitri10g00370-mRNA-1:cds;Parent=vitri10g00370-mRNA-1
chr10_pilon_pilon	maker	exon	666515	666654	.	+	.	ID=vitri10g00370-mRNA-1:exon:122;Parent=vitri10g00370-mRNA-3,vitri10g00370-mRNA-1
chr10_pilon_pilon	maker	CDS	666515	666654	.	+	0	ID=vitri10g00370-mRNA-1:cds;Parent=vitri10g00370-mRNA-1
chr10_pilon_pilon	maker	CDS	666739	667336	.	+	1	ID=vitri10g00370-mRNA-1:cds;Parent=vitri10g00370-mRNA-1
chr10_pilon_pilon	maker	CDS	667972	668084	.	+	0	ID=vitri10g00370-mRNA-1:cds;Parent=vitri10g00370-mRNA-1
chr10_pilon_pilon	maker	CDS	669329	669572	.	+	1	ID=vitri10g00370-mRNA-1:cds;Parent=vitri10g00370-mRNA-1
chr10_pilon_pilon	maker	CDS	670275	670502	.	+	0	ID=vitri10g00370-mRNA-1:cds;Parent=vitri10g00370-mRNA-1
chr10_pilon_pilon	maker	three_prime_UTR	670503	670902	.	+	.	ID=vitri10g00370-mRNA-1:three_prime_utr;Parent=vitri10g00370-mRNA-1
chr10_pilon_pilon	maker	three_prime_UTR	673599	673722	.	+	.	ID=vitri10g00370-mRNA-1:three_prime_utr;Parent=vitri10g00370-mRNA-1
chr10_pilon_pilon	maker	three_prime_UTR	674631	674681	.	+	.	ID=vitri10g00370-mRNA-1:three_prime_utr;Parent=vitri10g00370-mRNA-1
chr10_pilon_pilon	maker	three_prime_UTR	674985	675116	.	+	.	ID=vitri10g00370-mRNA-1:three_prime_utr;Parent=vitri10g00370-mRNA-1
chr10_pilon_pilon	maker	mRNA	661412	675116	.	+	.	ID=vitri10g00370-mRNA-2;Parent=vitri10g00370;Name=vitri10g00370-mRNA-2;_AED=0.08;_eAED=0.08;_QI=939|1|1|1|0.66|0.61|13|707|446;Note=Protein of unknown function;Dbxref=InterPro:IPR006927,PANTHER:PTHR31860,PANTHER:PTHR31860:SF4,Pfam:PF04842
chr10_pilon_pilon	maker	exon	661412	661694	.	+	.	ID=vitri10g00370-mRNA-1:exon:116;Parent=vitri10g00370-mRNA-3,vitri10g00370-mRNA-1,vitri10g00370-mRNA-2
chr10_pilon_pilon	maker	five_prime_UTR	661412	661694	.	+	.	ID=vitri10g00370-mRNA-2:five_prime_utr;Parent=vitri10g00370-mRNA-2
chr10_pilon_pilon	maker	exon	662560	662794	.	+	.	ID=vitri10g00370-mRNA-1:exon:117;Parent=vitri10g00370-mRNA-3,vitri10g00370-mRNA-1,vitri10g00370-mRNA-2
chr10_pilon_pilon	maker	five_prime_UTR	662560	662794	.	+	.	ID=vitri10g00370-mRNA-2:five_prime_utr;Parent=vitri10g00370-mRNA-2
chr10_pilon_pilon	maker	exon	662985	663071	.	+	.	ID=vitri10g00370-mRNA-1:exon:118;Parent=vitri10g00370-mRNA-3,vitri10g00370-mRNA-1,vitri10g00370-mRNA-2
chr10_pilon_pilon	maker	five_prime_UTR	662985	663071	.	+	.	ID=vitri10g00370-mRNA-2:five_prime_utr;Parent=vitri10g00370-mRNA-2
chr10_pilon_pilon	maker	exon	663211	663380	.	+	.	ID=vitri10g00370-mRNA-1:exon:119;Parent=vitri10g00370-mRNA-3,vitri10g00370-mRNA-1,vitri10g00370-mRNA-2
chr10_pilon_pilon	maker	five_prime_UTR	663211	663380	.	+	.	ID=vitri10g00370-mRNA-2:five_prime_utr;Parent=vitri10g00370-mRNA-2
chr10_pilon_pilon	maker	exon	665710	665852	.	+	.	ID=vitri10g00370-mRNA-1:exon:120;Parent=vitri10g00370-mRNA-3,vitri10g00370-mRNA-1,vitri10g00370-mRNA-2
chr10_pilon_pilon	maker	five_prime_UTR	665710	665852	.	+	.	ID=vitri10g00370-mRNA-2:five_prime_utr;Parent=vitri10g00370-mRNA-2
chr10_pilon_pilon	maker	five_prime_UTR	666476	666496	.	+	.	ID=vitri10g00370-mRNA-2:five_prime_utr;Parent=vitri10g00370-mRNA-2
chr10_pilon_pilon	maker	exon	666476	666654	.	+	.	ID=vitri10g00370-mRNA-2:exon:130;Parent=vitri10g00370-mRNA-2
chr10_pilon_pilon	maker	CDS	666497	666654	.	+	0	ID=vitri10g00370-mRNA-2:cds;Parent=vitri10g00370-mRNA-2
chr10_pilon_pilon	maker	exon	666739	667336	.	+	.	ID=vitri10g00370-mRNA-1:exon:123;Parent=vitri10g00370-mRNA-3,vitri10g00370-mRNA-1,vitri10g00370-mRNA-2
chr10_pilon_pilon	maker	CDS	666739	667336	.	+	1	ID=vitri10g00370-mRNA-2:cds;Parent=vitri10g00370-mRNA-2
chr10_pilon_pilon	maker	exon	667972	668084	.	+	.	ID=vitri10g00370-mRNA-1:exon:124;Parent=vitri10g00370-mRNA-1,vitri10g00370-mRNA-2
chr10_pilon_pilon	maker	CDS	667972	668084	.	+	0	ID=vitri10g00370-mRNA-2:cds;Parent=vitri10g00370-mRNA-2
chr10_pilon_pilon	maker	exon	669329	669572	.	+	.	ID=vitri10g00370-mRNA-1:exon:125;Parent=vitri10g00370-mRNA-1,vitri10g00370-mRNA-2
chr10_pilon_pilon	maker	CDS	669329	669572	.	+	1	ID=vitri10g00370-mRNA-2:cds;Parent=vitri10g00370-mRNA-2
chr10_pilon_pilon	maker	CDS	670275	670502	.	+	0	ID=vitri10g00370-mRNA-2:cds;Parent=vitri10g00370-mRNA-2
chr10_pilon_pilon	maker	exon	670275	670902	.	+	.	ID=vitri10g00370-mRNA-1:exon:126;Parent=vitri10g00370-mRNA-1,vitri10g00370-mRNA-2
chr10_pilon_pilon	maker	three_prime_UTR	670503	670902	.	+	.	ID=vitri10g00370-mRNA-2:three_prime_utr;Parent=vitri10g00370-mRNA-2
chr10_pilon_pilon	maker	exon	673599	673722	.	+	.	ID=vitri10g00370-mRNA-1:exon:127;Parent=vitri10g00370-mRNA-1,vitri10g00370-mRNA-2
chr10_pilon_pilon	maker	three_prime_UTR	673599	673722	.	+	.	ID=vitri10g00370-mRNA-2:three_prime_utr;Parent=vitri10g00370-mRNA-2
chr10_pilon_pilon	maker	exon	674631	674681	.	+	.	ID=vitri10g00370-mRNA-1:exon:128;Parent=vitri10g00370-mRNA-1,vitri10g00370-mRNA-2
chr10_pilon_pilon	maker	three_prime_UTR	674631	674681	.	+	.	ID=vitri10g00370-mRNA-2:three_prime_utr;Parent=vitri10g00370-mRNA-2
chr10_pilon_pilon	maker	exon	674985	675116	.	+	.	ID=vitri10g00370-mRNA-1:exon:129;Parent=vitri10g00370-mRNA-1,vitri10g00370-mRNA-2
chr10_pilon_pilon	maker	three_prime_UTR	674985	675116	.	+	.	ID=vitri10g00370-mRNA-2:three_prime_utr;Parent=vitri10g00370-mRNA-2
###
chr10_pilon_pilon	maker	gene	669088	675116	.	-	.	ID=vitri10g00380;Name=vitri10g00380;Note=Similar to gpatch11: G patch domain-containing protein 11 (Danio rerio OX%3D7955);Dbxref=Coils:Coil,InterPro:IPR000467,MobiDBLite:mobidb-lite,PANTHER:PTHR20923,Pfam:PF01585,ProSiteProfiles:PS50174,SMART:SM00443;Ontology_term=GO:0003676
chr10_pilon_pilon	maker	mRNA	669088	675116	.	-	.	ID=vitri10g00380-mRNA-1;Parent=vitri10g00380;Name=vitri10g00380-mRNA-1;_AED=0.00;_eAED=0.00;_QI=72|1|1|1|0.75|0.6|5|976|123;Note=Similar to gpatch11: G patch domain-containing protein 11 (Danio rerio OX%3D7955);Dbxref=Coils:Coil,InterPro:IPR000467,MobiDBLite:mobidb-lite,PANTHER:PTHR20923,Pfam:PF01585,ProSiteProfiles:PS50174,SMART:SM00443;Ontology_term=GO:0003676
chr10_pilon_pilon	maker	exon	669088	669569	.	-	.	ID=vitri10g00380-mRNA-1:exon:138;Parent=vitri10g00380-mRNA-1
chr10_pilon_pilon	maker	three_prime_UTR	669088	669569	.	-	.	ID=vitri10g00380-mRNA-1:three_prime_utr;Parent=vitri10g00380-mRNA-1
chr10_pilon_pilon	maker	three_prime_UTR	670272	670765	.	-	.	ID=vitri10g00380-mRNA-1:three_prime_utr;Parent=vitri10g00380-mRNA-1
chr10_pilon_pilon	maker	exon	670272	670900	.	-	.	ID=vitri10g00380-mRNA-1:exon:137;Parent=vitri10g00380-mRNA-1
chr10_pilon_pilon	maker	CDS	670766	670900	.	-	0	ID=vitri10g00380-mRNA-1:cds;Parent=vitri10g00380-mRNA-1
chr10_pilon_pilon	maker	exon	673597	673719	.	-	.	ID=vitri10g00380-mRNA-1:exon:136;Parent=vitri10g00380-mRNA-1
chr10_pilon_pilon	maker	CDS	673597	673719	.	-	0	ID=vitri10g00380-mRNA-1:cds;Parent=vitri10g00380-mRNA-1
chr10_pilon_pilon	maker	exon	674628	674681	.	-	.	ID=vitri10g00380-mRNA-1:exon:135;Parent=vitri10g00380-mRNA-1
chr10_pilon_pilon	maker	CDS	674628	674681	.	-	0	ID=vitri10g00380-mRNA-1:cds;Parent=vitri10g00380-mRNA-1
chr10_pilon_pilon	maker	CDS	674985	675044	.	-	0	ID=vitri10g00380-mRNA-1:cds;Parent=vitri10g00380-mRNA-1
chr10_pilon_pilon	maker	exon	674985	675116	.	-	.	ID=vitri10g00380-mRNA-1:exon:134;Parent=vitri10g00380-mRNA-1
chr10_pilon_pilon	maker	five_prime_UTR	675045	675116	.	-	.	ID=vitri10g00380-mRNA-1:five_prime_utr;Parent=vitri10g00380-mRNA-1
###
chr10_pilon_pilon	maker	gene	687922	703452	.	+	.	ID=vitri10g00390;Name=vitri10g00390;Note=Similar to FYPP: Phytochrome-associated serine/threonine-protein phosphatase (Pisum sativum OX%3D3888);Dbxref=CDD:cd07415,Gene3D:G3DSA:3.60.21.10,InterPro:IPR004843,InterPro:IPR006186,InterPro:IPR029052,PANTHER:PTHR11668,PANTHER:PTHR11668:SF24,PANTHER:PTHR11668:SF400,PRINTS:PR00114,Pfam:PF00149,ProSitePatterns:PS00125,SMART:SM00156,SUPERFAMILY:SSF56300;Ontology_term=GO:0016787
chr10_pilon_pilon	maker	mRNA	687922	702187	.	+	.	ID=vitri10g00390-mRNA-2;Parent=vitri10g00390;Name=vitri10g00390-mRNA-2;_AED=0.26;_eAED=0.26;_QI=136|1|1|1|0.77|0.8|10|0|278;Note=Similar to SPBC26H8.05c: Putative serine/threonine-protein phosphatase C26H8.05c (Schizosaccharomyces pombe (strain 972 / ATCC 24843) OX%3D284812);Dbxref=CDD:cd07415,Gene3D:G3DSA:3.60.21.10,InterPro:IPR004843,InterPro:IPR006186,InterPro:IPR029052,PANTHER:PTHR11668,PANTHER:PTHR11668:SF24,PRINTS:PR00114,Pfam:PF00149,ProSitePatterns:PS00125,SMART:SM00156,SUPERFAMILY:SSF56300;Ontology_term=GO:0016787
chr10_pilon_pilon	maker	five_prime_UTR	687922	688041	.	+	.	ID=vitri10g00390-mRNA-2:five_prime_utr;Parent=vitri10g00390-mRNA-2
chr10_pilon_pilon	maker	five_prime_UTR	688144	688159	.	+	.	ID=vitri10g00390-mRNA-2:five_prime_utr;Parent=vitri10g00390-mRNA-2
chr10_pilon_pilon	maker	CDS	688160	688240	.	+	0	ID=vitri10g00390-mRNA-2:cds;Parent=vitri10g00390-mRNA-2
chr10_pilon_pilon	maker	CDS	696105	696251	.	+	0	ID=vitri10g00390-mRNA-2:cds;Parent=vitri10g00390-mRNA-2
chr10_pilon_pilon	maker	CDS	696368	696435	.	+	0	ID=vitri10g00390-mRNA-2:cds;Parent=vitri10g00390-mRNA-2
chr10_pilon_pilon	maker	CDS	699216	699273	.	+	1	ID=vitri10g00390-mRNA-2:cds;Parent=vitri10g00390-mRNA-2
chr10_pilon_pilon	maker	CDS	700196	700306	.	+	0	ID=vitri10g00390-mRNA-2:cds;Parent=vitri10g00390-mRNA-2
chr10_pilon_pilon	maker	CDS	700430	700480	.	+	0	ID=vitri10g00390-mRNA-2:cds;Parent=vitri10g00390-mRNA-2
chr10_pilon_pilon	maker	CDS	701708	701851	.	+	0	ID=vitri10g00390-mRNA-2:cds;Parent=vitri10g00390-mRNA-2
chr10_pilon_pilon	maker	CDS	701929	702024	.	+	0	ID=vitri10g00390-mRNA-2:cds;Parent=vitri10g00390-mRNA-2
chr10_pilon_pilon	maker	exon	702110	702187	.	+	.	ID=vitri10g00390-mRNA-2:exon:183;Parent=vitri10g00390-mRNA-2
chr10_pilon_pilon	maker	CDS	702110	702187	.	+	0	ID=vitri10g00390-mRNA-2:cds;Parent=vitri10g00390-mRNA-2
chr10_pilon_pilon	maker	mRNA	687922	703452	.	+	.	ID=vitri10g00390-mRNA-1;Parent=vitri10g00390;Name=vitri10g00390-mRNA-1;_AED=0.12;_eAED=0.12;_QI=136|1|1|1|0.8|0.81|11|454|303;Note=Similar to FYPP: Phytochrome-associated serine/threonine-protein phosphatase (Pisum sativum OX%3D3888);Dbxref=CDD:cd07415,Gene3D:G3DSA:3.60.21.10,InterPro:IPR004843,InterPro:IPR006186,InterPro:IPR029052,PANTHER:PTHR11668,PANTHER:PTHR11668:SF400,PRINTS:PR00114,Pfam:PF00149,ProSitePatterns:PS00125,SMART:SM00156,SUPERFAMILY:SSF56300;Ontology_term=GO:0016787
chr10_pilon_pilon	maker	exon	687922	688041	.	+	.	ID=vitri10g00390-mRNA-1:exon:172;Parent=vitri10g00390-mRNA-2,vitri10g00390-mRNA-1
chr10_pilon_pilon	maker	five_prime_UTR	687922	688041	.	+	.	ID=vitri10g00390-mRNA-1:five_prime_utr;Parent=vitri10g00390-mRNA-1
chr10_pilon_pilon	maker	five_prime_UTR	688144	688159	.	+	.	ID=vitri10g00390-mRNA-1:five_prime_utr;Parent=vitri10g00390-mRNA-1
chr10_pilon_pilon	maker	exon	688144	688240	.	+	.	ID=vitri10g00390-mRNA-1:exon:173;Parent=vitri10g00390-mRNA-2,vitri10g00390-mRNA-1
chr10_pilon_pilon	maker	CDS	688160	688240	.	+	0	ID=vitri10g00390-mRNA-1:cds;Parent=vitri10g00390-mRNA-1
chr10_pilon_pilon	maker	exon	696105	696251	.	+	.	ID=vitri10g00390-mRNA-1:exon:174;Parent=vitri10g00390-mRNA-2,vitri10g00390-mRNA-1
chr10_pilon_pilon	maker	CDS	696105	696251	.	+	0	ID=vitri10g00390-mRNA-1:cds;Parent=vitri10g00390-mRNA-1
chr10_pilon_pilon	maker	exon	696368	696435	.	+	.	ID=vitri10g00390-mRNA-1:exon:175;Parent=vitri10g00390-mRNA-2,vitri10g00390-mRNA-1
chr10_pilon_pilon	maker	CDS	696368	696435	.	+	0	ID=vitri10g00390-mRNA-1:cds;Parent=vitri10g00390-mRNA-1
chr10_pilon_pilon	maker	exon	699216	699273	.	+	.	ID=vitri10g00390-mRNA-1:exon:176;Parent=vitri10g00390-mRNA-2,vitri10g00390-mRNA-1
chr10_pilon_pilon	maker	CDS	699216	699273	.	+	1	ID=vitri10g00390-mRNA-1:cds;Parent=vitri10g00390-mRNA-1
chr10_pilon_pilon	maker	exon	700196	700306	.	+	.	ID=vitri10g00390-mRNA-1:exon:177;Parent=vitri10g00390-mRNA-2,vitri10g00390-mRNA-1
chr10_pilon_pilon	maker	CDS	700196	700306	.	+	0	ID=vitri10g00390-mRNA-1:cds;Parent=vitri10g00390-mRNA-1
chr10_pilon_pilon	maker	exon	700430	700480	.	+	.	ID=vitri10g00390-mRNA-1:exon:178;Parent=vitri10g00390-mRNA-2,vitri10g00390-mRNA-1
chr10_pilon_pilon	maker	CDS	700430	700480	.	+	0	ID=vitri10g00390-mRNA-1:cds;Parent=vitri10g00390-mRNA-1
chr10_pilon_pilon	maker	exon	701708	701851	.	+	.	ID=vitri10g00390-mRNA-1:exon:179;Parent=vitri10g00390-mRNA-2,vitri10g00390-mRNA-1
chr10_pilon_pilon	maker	CDS	701708	701851	.	+	0	ID=vitri10g00390-mRNA-1:cds;Parent=vitri10g00390-mRNA-1
chr10_pilon_pilon	maker	exon	701929	702024	.	+	.	ID=vitri10g00390-mRNA-1:exon:180;Parent=vitri10g00390-mRNA-2,vitri10g00390-mRNA-1
chr10_pilon_pilon	maker	CDS	701929	702024	.	+	0	ID=vitri10g00390-mRNA-1:cds;Parent=vitri10g00390-mRNA-1
chr10_pilon_pilon	maker	exon	702110	702181	.	+	.	ID=vitri10g00390-mRNA-1:exon:181;Parent=vitri10g00390-mRNA-1
chr10_pilon_pilon	maker	CDS	702110	702181	.	+	0	ID=vitri10g00390-mRNA-1:cds;Parent=vitri10g00390-mRNA-1
chr10_pilon_pilon	maker	CDS	702915	702998	.	+	0	ID=vitri10g00390-mRNA-1:cds;Parent=vitri10g00390-mRNA-1
chr10_pilon_pilon	maker	exon	702915	703452	.	+	.	ID=vitri10g00390-mRNA-1:exon:182;Parent=vitri10g00390-mRNA-1
chr10_pilon_pilon	maker	three_prime_UTR	702999	703452	.	+	.	ID=vitri10g00390-mRNA-1:three_prime_utr;Parent=vitri10g00390-mRNA-1
###
chr10_pilon_pilon	maker	gene	704125	711486	.	+	.	ID=vitri10g00400;Name=vitri10g00400;Note=Protein of unknown function;Dbxref=Gene3D:G3DSA:2.130.10.120,InterPro:IPR023302,MobiDBLite:mobidb-lite,PANTHER:PTHR11757,PANTHER:PTHR11757:SF3,Pfam:PF02897,SUPERFAMILY:SSF50993;Ontology_term=GO:0004252,GO:0070008
chr10_pilon_pilon	maker	mRNA	704125	711486	.	+	.	ID=vitri10g00400-mRNA-1;Parent=vitri10g00400;Name=vitri10g00400-mRNA-1;_AED=0.05;_eAED=0.05;_QI=0|1|0.5|1|1|0.75|4|0|389;Note=Protein of unknown function;Dbxref=Gene3D:G3DSA:2.130.10.120,InterPro:IPR023302,MobiDBLite:mobidb-lite,PANTHER:PTHR11757,PANTHER:PTHR11757:SF3,Pfam:PF02897,SUPERFAMILY:SSF50993;Ontology_term=GO:0004252,GO:0070008
chr10_pilon_pilon	maker	exon	704125	704467	.	+	.	ID=vitri10g00400-mRNA-1:exon:168;Parent=vitri10g00400-mRNA-1
chr10_pilon_pilon	maker	CDS	704125	704467	.	+	0	ID=vitri10g00400-mRNA-1:cds;Parent=vitri10g00400-mRNA-1
chr10_pilon_pilon	maker	exon	705664	705947	.	+	.	ID=vitri10g00400-mRNA-1:exon:169;Parent=vitri10g00400-mRNA-1
chr10_pilon_pilon	maker	CDS	705664	705947	.	+	2	ID=vitri10g00400-mRNA-1:cds;Parent=vitri10g00400-mRNA-1
chr10_pilon_pilon	maker	exon	706056	706250	.	+	.	ID=vitri10g00400-mRNA-1:exon:170;Parent=vitri10g00400-mRNA-1
chr10_pilon_pilon	maker	CDS	706056	706250	.	+	0	ID=vitri10g00400-mRNA-1:cds;Parent=vitri10g00400-mRNA-1
chr10_pilon_pilon	maker	exon	711142	711486	.	+	.	ID=vitri10g00400-mRNA-1:exon:171;Parent=vitri10g00400-mRNA-1
chr10_pilon_pilon	maker	CDS	711142	711486	.	+	0	ID=vitri10g00400-mRNA-1:cds;Parent=vitri10g00400-mRNA-1
###
chr10_pilon_pilon	maker	gene	724854	751792	.	+	.	ID=vitri10g00410;Name=vitri10g00410;Note=Similar to ptrB: Protease 2 (Moraxella lacunata OX%3D477);Dbxref=Gene3D:G3DSA:3.40.50.1820,InterPro:IPR001375,InterPro:IPR002470,InterPro:IPR023302,InterPro:IPR029058,PANTHER:PTHR11757,PANTHER:PTHR11757:SF3,PRINTS:PR00862,Pfam:PF00326,Pfam:PF02897,SUPERFAMILY:SSF50993,SUPERFAMILY:SSF53474;Ontology_term=GO:0004252,GO:0006508,GO:0008236,GO:0070008
chr10_pilon_pilon	maker	mRNA	724854	751792	.	+	.	ID=vitri10g00410-mRNA-1;Parent=vitri10g00410;Name=vitri10g00410-mRNA-1;_AED=0.21;_eAED=0.21;_QI=0|1|0.85|1|1|0.85|7|7|381;Note=Similar to ptrB: Protease 2 (Moraxella lacunata OX%3D477);Dbxref=Gene3D:G3DSA:3.40.50.1820,InterPro:IPR001375,InterPro:IPR002470,InterPro:IPR023302,InterPro:IPR029058,PANTHER:PTHR11757,PANTHER:PTHR11757:SF3,PRINTS:PR00862,Pfam:PF00326,Pfam:PF02897,SUPERFAMILY:SSF50993,SUPERFAMILY:SSF53474;Ontology_term=GO:0004252,GO:0006508,GO:0008236,GO:0070008
chr10_pilon_pilon	maker	exon	724854	725144	.	+	.	ID=vitri10g00410-mRNA-1:exon:184;Parent=vitri10g00410-mRNA-1
chr10_pilon_pilon	maker	CDS	724854	725144	.	+	0	ID=vitri10g00410-mRNA-1:cds;Parent=vitri10g00410-mRNA-1
chr10_pilon_pilon	maker	exon	734211	734369	.	+	.	ID=vitri10g00410-mRNA-1:exon:185;Parent=vitri10g00410-mRNA-1
chr10_pilon_pilon	maker	CDS	734211	734369	.	+	0	ID=vitri10g00410-mRNA-1:cds;Parent=vitri10g00410-mRNA-1
chr10_pilon_pilon	maker	exon	734934	735299	.	+	.	ID=vitri10g00410-mRNA-1:exon:186;Parent=vitri10g00410-mRNA-1
chr10_pilon_pilon	maker	CDS	734934	735299	.	+	0	ID=vitri10g00410-mRNA-1:cds;Parent=vitri10g00410-mRNA-1
chr10_pilon_pilon	maker	exon	744706	744771	.	+	.	ID=vitri10g00410-mRNA-1:exon:187;Parent=vitri10g00410-mRNA-1
chr10_pilon_pilon	maker	CDS	744706	744771	.	+	0	ID=vitri10g00410-mRNA-1:cds;Parent=vitri10g00410-mRNA-1
chr10_pilon_pilon	maker	exon	745034	745082	.	+	.	ID=vitri10g00410-mRNA-1:exon:188;Parent=vitri10g00410-mRNA-1
chr10_pilon_pilon	maker	CDS	745034	745082	.	+	0	ID=vitri10g00410-mRNA-1:cds;Parent=vitri10g00410-mRNA-1
chr10_pilon_pilon	maker	exon	749791	749914	.	+	.	ID=vitri10g00410-mRNA-1:exon:189;Parent=vitri10g00410-mRNA-1
chr10_pilon_pilon	maker	CDS	749791	749914	.	+	2	ID=vitri10g00410-mRNA-1:cds;Parent=vitri10g00410-mRNA-1
chr10_pilon_pilon	maker	CDS	751695	751785	.	+	1	ID=vitri10g00410-mRNA-1:cds;Parent=vitri10g00410-mRNA-1
chr10_pilon_pilon	maker	exon	751695	751792	.	+	.	ID=vitri10g00410-mRNA-1:exon:190;Parent=vitri10g00410-mRNA-1
chr10_pilon_pilon	maker	three_prime_UTR	751786	751792	.	+	.	ID=vitri10g00410-mRNA-1:three_prime_utr;Parent=vitri10g00410-mRNA-1
###
chr10_pilon_pilon	maker	gene	753460	754725	.	+	.	ID=vitri10g00420;Name=vitri10g00420;Note=Protein of unknown function;Dbxref=InterPro:IPR011990,PANTHER:PTHR37391,PANTHER:PTHR37391:SF2,SUPERFAMILY:SSF48452;Ontology_term=GO:0005515
chr10_pilon_pilon	maker	mRNA	753460	754725	.	+	.	ID=vitri10g00420-mRNA-1;Parent=vitri10g00420;Name=vitri10g00420-mRNA-1;_AED=0.05;_eAED=0.05;_QI=0|-1|0|1|-1|1|1|0|421;Note=Protein of unknown function;Dbxref=InterPro:IPR011990,PANTHER:PTHR37391,PANTHER:PTHR37391:SF2,SUPERFAMILY:SSF48452;Ontology_term=GO:0005515
chr10_pilon_pilon	maker	exon	753460	754725	.	+	.	ID=vitri10g00420-mRNA-1:exon:167;Parent=vitri10g00420-mRNA-1
chr10_pilon_pilon	maker	CDS	753460	754725	.	+	0	ID=vitri10g00420-mRNA-1:cds;Parent=vitri10g00420-mRNA-1
###
chr10_pilon_pilon	maker	gene	765471	809214	.	+	.	ID=vitri10g00430;Name=vitri10g00430;Note=Similar to dapb3: Dipeptidyl aminopeptidase BIII (Pseudoxanthomonas mexicana OX%3D128785);Dbxref=Gene3D:G3DSA:2.130.10.120,Gene3D:G3DSA:3.40.50.1820,InterPro:IPR001375,InterPro:IPR002470,InterPro:IPR023302,InterPro:IPR029058,PANTHER:PTHR11757,PANTHER:PTHR11757:SF3,PRINTS:PR00862,Pfam:PF00326,Pfam:PF02897,SUPERFAMILY:SSF50993,SUPERFAMILY:SSF53474;Ontology_term=GO:0004252,GO:0006508,GO:0008236,GO:0070008
chr10_pilon_pilon	maker	mRNA	765471	809214	.	+	.	ID=vitri10g00430-mRNA-1;Parent=vitri10g00430;Name=vitri10g00430-mRNA-1;_AED=0.29;_eAED=0.32;_QI=15|0.75|0.76|1|0.58|0.76|13|0|769;Note=Similar to dapb3: Dipeptidyl aminopeptidase BIII (Pseudoxanthomonas mexicana OX%3D128785);Dbxref=Gene3D:G3DSA:2.130.10.120,Gene3D:G3DSA:3.40.50.1820,InterPro:IPR001375,InterPro:IPR002470,InterPro:IPR023302,InterPro:IPR029058,PANTHER:PTHR11757,PANTHER:PTHR11757:SF3,PRINTS:PR00862,Pfam:PF00326,Pfam:PF02897,SUPERFAMILY:SSF50993,SUPERFAMILY:SSF53474;Ontology_term=GO:0004252,GO:0006508,GO:0008236,GO:0070008
chr10_pilon_pilon	maker	five_prime_UTR	765471	765485	.	+	.	ID=vitri10g00430-mRNA-1:five_prime_utr;Parent=vitri10g00430-mRNA-1
chr10_pilon_pilon	maker	CDS	765486	765684	.	+	0	ID=vitri10g00430-mRNA-1:cds;Parent=vitri10g00430-mRNA-1
chr10_pilon_pilon	maker	CDS	774154	774437	.	+	2	ID=vitri10g00430-mRNA-1:cds;Parent=vitri10g00430-mRNA-1
chr10_pilon_pilon	maker	CDS	774539	774733	.	+	0	ID=vitri10g00430-mRNA-1:cds;Parent=vitri10g00430-mRNA-1
chr10_pilon_pilon	maker	CDS	779962	780308	.	+	0	ID=vitri10g00430-mRNA-1:cds;Parent=vitri10g00430-mRNA-1
chr10_pilon_pilon	maker	CDS	787189	787480	.	+	1	ID=vitri10g00430-mRNA-1:cds;Parent=vitri10g00430-mRNA-1
chr10_pilon_pilon	maker	CDS	794180	794230	.	+	0	ID=vitri10g00430-mRNA-1:cds;Parent=vitri10g00430-mRNA-1
chr10_pilon_pilon	maker	CDS	794841	794999	.	+	0	ID=vitri10g00430-mRNA-1:cds;Parent=vitri10g00430-mRNA-1
chr10_pilon_pilon	maker	CDS	795622	795987	.	+	0	ID=vitri10g00430-mRNA-1:cds;Parent=vitri10g00430-mRNA-1
chr10_pilon_pilon	maker	CDS	802101	802166	.	+	0	ID=vitri10g00430-mRNA-1:cds;Parent=vitri10g00430-mRNA-1
chr10_pilon_pilon	maker	CDS	802375	802423	.	+	0	ID=vitri10g00430-mRNA-1:cds;Parent=vitri10g00430-mRNA-1
chr10_pilon_pilon	maker	CDS	803623	803746	.	+	2	ID=vitri10g00430-mRNA-1:cds;Parent=vitri10g00430-mRNA-1
chr10_pilon_pilon	maker	exon	808657	808753	.	+	.	ID=vitri10g00430-mRNA-1:exon:202;Parent=vitri10g00430-mRNA-1
chr10_pilon_pilon	maker	CDS	808657	808753	.	+	1	ID=vitri10g00430-mRNA-1:cds;Parent=vitri10g00430-mRNA-1
chr10_pilon_pilon	maker	CDS	809134	809214	.	+	0	ID=vitri10g00430-mRNA-1:cds;Parent=vitri10g00430-mRNA-1
chr10_pilon_pilon	maker	mRNA	765471	809214	.	+	.	ID=vitri10g00430-mRNA-2;Parent=vitri10g00430;Name=vitri10g00430-mRNA-2;_AED=0.29;_eAED=0.32;_QI=15|0.83|0.76|1|0.58|0.76|13|0|763;Note=Similar to POPA: Prolyl oligopeptidase A (Amanita bisporigera OX%3D87325);Dbxref=Gene3D:G3DSA:2.130.10.120,Gene3D:G3DSA:3.40.50.1820,InterPro:IPR001375,InterPro:IPR002470,InterPro:IPR023302,InterPro:IPR029058,PANTHER:PTHR11757,PANTHER:PTHR11757:SF3,PRINTS:PR00862,Pfam:PF00326,Pfam:PF02897,SUPERFAMILY:SSF50993,SUPERFAMILY:SSF53474;Ontology_term=GO:0004252,GO:0006508,GO:0008236,GO:0070008
chr10_pilon_pilon	maker	five_prime_UTR	765471	765485	.	+	.	ID=vitri10g00430-mRNA-2:five_prime_utr;Parent=vitri10g00430-mRNA-2
chr10_pilon_pilon	maker	CDS	765486	765684	.	+	0	ID=vitri10g00430-mRNA-2:cds;Parent=vitri10g00430-mRNA-2
chr10_pilon_pilon	maker	CDS	774154	774437	.	+	2	ID=vitri10g00430-mRNA-2:cds;Parent=vitri10g00430-mRNA-2
chr10_pilon_pilon	maker	CDS	774539	774733	.	+	0	ID=vitri10g00430-mRNA-2:cds;Parent=vitri10g00430-mRNA-2
chr10_pilon_pilon	maker	CDS	779962	780308	.	+	0	ID=vitri10g00430-mRNA-2:cds;Parent=vitri10g00430-mRNA-2
chr10_pilon_pilon	maker	CDS	787189	787480	.	+	1	ID=vitri10g00430-mRNA-2:cds;Parent=vitri10g00430-mRNA-2
chr10_pilon_pilon	maker	exon	794180	794230	.	+	.	ID=vitri10g00430-mRNA-1:exon:196;Parent=vitri10g00430-mRNA-1,vitri10g00430-mRNA-2
chr10_pilon_pilon	maker	CDS	794180	794230	.	+	0	ID=vitri10g00430-mRNA-2:cds;Parent=vitri10g00430-mRNA-2
chr10_pilon_pilon	maker	CDS	794841	794999	.	+	0	ID=vitri10g00430-mRNA-2:cds;Parent=vitri10g00430-mRNA-2
chr10_pilon_pilon	maker	CDS	795622	795987	.	+	0	ID=vitri10g00430-mRNA-2:cds;Parent=vitri10g00430-mRNA-2
chr10_pilon_pilon	maker	CDS	802101	802166	.	+	0	ID=vitri10g00430-mRNA-2:cds;Parent=vitri10g00430-mRNA-2
chr10_pilon_pilon	maker	CDS	802375	802423	.	+	0	ID=vitri10g00430-mRNA-2:cds;Parent=vitri10g00430-mRNA-2
chr10_pilon_pilon	maker	CDS	803623	803746	.	+	2	ID=vitri10g00430-mRNA-2:cds;Parent=vitri10g00430-mRNA-2
chr10_pilon_pilon	maker	CDS	808675	808753	.	+	1	ID=vitri10g00430-mRNA-2:cds;Parent=vitri10g00430-mRNA-2
chr10_pilon_pilon	maker	CDS	809134	809214	.	+	0	ID=vitri10g00430-mRNA-2:cds;Parent=vitri10g00430-mRNA-2
chr10_pilon_pilon	maker	mRNA	765471	809214	.	+	.	ID=vitri10g00430-mRNA-3;Parent=vitri10g00430;Name=vitri10g00430-mRNA-3;_AED=0.30;_eAED=0.32;_QI=15|0.90|0.83|1|0.63|0.83|12|0|746;Note=Similar to ptrB: Protease 2 (Moraxella lacunata OX%3D477);Dbxref=Gene3D:G3DSA:2.130.10.120,Gene3D:G3DSA:3.40.50.1820,InterPro:IPR001375,InterPro:IPR002470,InterPro:IPR023302,InterPro:IPR029058,PANTHER:PTHR11757,PANTHER:PTHR11757:SF3,PRINTS:PR00862,Pfam:PF00326,Pfam:PF02897,SUPERFAMILY:SSF50993,SUPERFAMILY:SSF53474;Ontology_term=GO:0004252,GO:0006508,GO:0008236,GO:0070008
chr10_pilon_pilon	maker	five_prime_UTR	765471	765485	.	+	.	ID=vitri10g00430-mRNA-3:five_prime_utr;Parent=vitri10g00430-mRNA-3
chr10_pilon_pilon	maker	exon	765471	765684	.	+	.	ID=vitri10g00430-mRNA-1:exon:191;Parent=vitri10g00430-mRNA-1,vitri10g00430-mRNA-2,vitri10g00430-mRNA-3
chr10_pilon_pilon	maker	CDS	765486	765684	.	+	0	ID=vitri10g00430-mRNA-3:cds;Parent=vitri10g00430-mRNA-3
chr10_pilon_pilon	maker	exon	774154	774437	.	+	.	ID=vitri10g00430-mRNA-1:exon:192;Parent=vitri10g00430-mRNA-1,vitri10g00430-mRNA-2,vitri10g00430-mRNA-3
chr10_pilon_pilon	maker	CDS	774154	774437	.	+	2	ID=vitri10g00430-mRNA-3:cds;Parent=vitri10g00430-mRNA-3
chr10_pilon_pilon	maker	exon	774539	774733	.	+	.	ID=vitri10g00430-mRNA-1:exon:193;Parent=vitri10g00430-mRNA-1,vitri10g00430-mRNA-2,vitri10g00430-mRNA-3
chr10_pilon_pilon	maker	CDS	774539	774733	.	+	0	ID=vitri10g00430-mRNA-3:cds;Parent=vitri10g00430-mRNA-3
chr10_pilon_pilon	maker	exon	779962	780308	.	+	.	ID=vitri10g00430-mRNA-1:exon:194;Parent=vitri10g00430-mRNA-1,vitri10g00430-mRNA-2,vitri10g00430-mRNA-3
chr10_pilon_pilon	maker	CDS	779962	780308	.	+	0	ID=vitri10g00430-mRNA-3:cds;Parent=vitri10g00430-mRNA-3
chr10_pilon_pilon	maker	exon	787189	787480	.	+	.	ID=vitri10g00430-mRNA-1:exon:195;Parent=vitri10g00430-mRNA-1,vitri10g00430-mRNA-2,vitri10g00430-mRNA-3
chr10_pilon_pilon	maker	CDS	787189	787480	.	+	1	ID=vitri10g00430-mRNA-3:cds;Parent=vitri10g00430-mRNA-3
chr10_pilon_pilon	maker	exon	794841	794999	.	+	.	ID=vitri10g00430-mRNA-1:exon:197;Parent=vitri10g00430-mRNA-1,vitri10g00430-mRNA-2,vitri10g00430-mRNA-3
chr10_pilon_pilon	maker	CDS	794841	794999	.	+	0	ID=vitri10g00430-mRNA-3:cds;Parent=vitri10g00430-mRNA-3
chr10_pilon_pilon	maker	exon	795622	795987	.	+	.	ID=vitri10g00430-mRNA-1:exon:198;Parent=vitri10g00430-mRNA-1,vitri10g00430-mRNA-2,vitri10g00430-mRNA-3
chr10_pilon_pilon	maker	CDS	795622	795987	.	+	0	ID=vitri10g00430-mRNA-3:cds;Parent=vitri10g00430-mRNA-3
chr10_pilon_pilon	maker	exon	802101	802166	.	+	.	ID=vitri10g00430-mRNA-1:exon:199;Parent=vitri10g00430-mRNA-1,vitri10g00430-mRNA-2,vitri10g00430-mRNA-3
chr10_pilon_pilon	maker	CDS	802101	802166	.	+	0	ID=vitri10g00430-mRNA-3:cds;Parent=vitri10g00430-mRNA-3
chr10_pilon_pilon	maker	exon	802375	802423	.	+	.	ID=vitri10g00430-mRNA-1:exon:200;Parent=vitri10g00430-mRNA-1,vitri10g00430-mRNA-2,vitri10g00430-mRNA-3
chr10_pilon_pilon	maker	CDS	802375	802423	.	+	0	ID=vitri10g00430-mRNA-3:cds;Parent=vitri10g00430-mRNA-3
chr10_pilon_pilon	maker	exon	803623	803746	.	+	.	ID=vitri10g00430-mRNA-1:exon:201;Parent=vitri10g00430-mRNA-1,vitri10g00430-mRNA-2,vitri10g00430-mRNA-3
chr10_pilon_pilon	maker	CDS	803623	803746	.	+	2	ID=vitri10g00430-mRNA-3:cds;Parent=vitri10g00430-mRNA-3
chr10_pilon_pilon	maker	exon	808675	808753	.	+	.	ID=vitri10g00430-mRNA-2:exon:204;Parent=vitri10g00430-mRNA-2,vitri10g00430-mRNA-3
chr10_pilon_pilon	maker	CDS	808675	808753	.	+	1	ID=vitri10g00430-mRNA-3:cds;Parent=vitri10g00430-mRNA-3
chr10_pilon_pilon	maker	exon	809134	809214	.	+	.	ID=vitri10g00430-mRNA-1:exon:203;Parent=vitri10g00430-mRNA-1,vitri10g00430-mRNA-2,vitri10g00430-mRNA-3
chr10_pilon_pilon	maker	CDS	809134	809214	.	+	0	ID=vitri10g00430-mRNA-3:cds;Parent=vitri10g00430-mRNA-3
###
chr10_pilon_pilon	maker	gene	778015	779251	.	-	.	ID=vitri10g00440;Name=vitri10g00440;Note=Protein of unknown function
chr10_pilon_pilon	maker	mRNA	778015	779251	.	-	.	ID=vitri10g00440-mRNA-1;Parent=vitri10g00440;Name=vitri10g00440-mRNA-1;_AED=0.37;_eAED=0.71;_QI=74|0|0|1|0|0|4|0|149;Note=Protein of unknown function
chr10_pilon_pilon	maker	exon	778015	778266	.	-	.	ID=vitri10g00440-mRNA-1:exon:191;Parent=vitri10g00440-mRNA-1
chr10_pilon_pilon	maker	CDS	778015	778266	.	-	0	ID=vitri10g00440-mRNA-1:cds;Parent=vitri10g00440-mRNA-1
chr10_pilon_pilon	maker	exon	778647	778707	.	-	.	ID=vitri10g00440-mRNA-1:exon:192;Parent=vitri10g00440-mRNA-1
chr10_pilon_pilon	maker	CDS	778647	778707	.	-	1	ID=vitri10g00440-mRNA-1:cds;Parent=vitri10g00440-mRNA-1
chr10_pilon_pilon	maker	exon	778742	778867	.	-	.	ID=vitri10g00440-mRNA-1:exon:193;Parent=vitri10g00440-mRNA-1
chr10_pilon_pilon	maker	CDS	778742	778867	.	-	1	ID=vitri10g00440-mRNA-1:cds;Parent=vitri10g00440-mRNA-1
chr10_pilon_pilon	maker	CDS	779170	779177	.	-	0	ID=vitri10g00440-mRNA-1:cds;Parent=vitri10g00440-mRNA-1
chr10_pilon_pilon	maker	exon	779170	779251	.	-	.	ID=vitri10g00440-mRNA-1:exon:194;Parent=vitri10g00440-mRNA-1
chr10_pilon_pilon	maker	five_prime_UTR	779178	779251	.	-	.	ID=vitri10g00440-mRNA-1:five_prime_utr;Parent=vitri10g00440-mRNA-1
###
chr10_pilon_pilon	maker	gene	809490	816124	.	-	.	ID=vitri10g00450;Name=vitri10g00450;Note=Protein of unknown function;Dbxref=CDD:cd09034,Gene3D:G3DSA:1.25.40.280,InterPro:IPR004328,InterPro:IPR038499,InterPro:IPR038898,PANTHER:PTHR23032,PANTHER:PTHR23032:SF5,ProSiteProfiles:PS51180,SMART:SM01041
chr10_pilon_pilon	maker	mRNA	809490	816124	.	-	.	ID=vitri10g00450-mRNA-1;Parent=vitri10g00450;Name=vitri10g00450-mRNA-1;_AED=0.22;_eAED=0.22;_QI=239|0.83|0.84|1|0.66|0.69|13|457|428;Note=Protein of unknown function;Dbxref=CDD:cd09034,Gene3D:G3DSA:1.25.40.280,InterPro:IPR004328,InterPro:IPR038499,InterPro:IPR038898,PANTHER:PTHR23032,PANTHER:PTHR23032:SF5,ProSiteProfiles:PS51180,SMART:SM01041
chr10_pilon_pilon	maker	three_prime_UTR	809490	809946	.	-	.	ID=vitri10g00450-mRNA-1:three_prime_utr;Parent=vitri10g00450-mRNA-1
chr10_pilon_pilon	maker	CDS	809947	810076	.	-	1	ID=vitri10g00450-mRNA-1:cds;Parent=vitri10g00450-mRNA-1
chr10_pilon_pilon	maker	CDS	810551	810652	.	-	1	ID=vitri10g00450-mRNA-1:cds;Parent=vitri10g00450-mRNA-1
chr10_pilon_pilon	maker	CDS	810821	810975	.	-	0	ID=vitri10g00450-mRNA-1:cds;Parent=vitri10g00450-mRNA-1
chr10_pilon_pilon	maker	CDS	811557	811673	.	-	0	ID=vitri10g00450-mRNA-1:cds;Parent=vitri10g00450-mRNA-1
chr10_pilon_pilon	maker	CDS	812272	812370	.	-	0	ID=vitri10g00450-mRNA-1:cds;Parent=vitri10g00450-mRNA-1
chr10_pilon_pilon	maker	CDS	812927	812993	.	-	1	ID=vitri10g00450-mRNA-1:cds;Parent=vitri10g00450-mRNA-1
chr10_pilon_pilon	maker	CDS	813113	813209	.	-	2	ID=vitri10g00450-mRNA-1:cds;Parent=vitri10g00450-mRNA-1
chr10_pilon_pilon	maker	CDS	813922	814057	.	-	0	ID=vitri10g00450-mRNA-1:cds;Parent=vitri10g00450-mRNA-1
chr10_pilon_pilon	maker	CDS	814147	814205	.	-	2	ID=vitri10g00450-mRNA-1:cds;Parent=vitri10g00450-mRNA-1
chr10_pilon_pilon	maker	CDS	814901	814975	.	-	2	ID=vitri10g00450-mRNA-1:cds;Parent=vitri10g00450-mRNA-1
chr10_pilon_pilon	maker	CDS	815067	815316	.	-	0	ID=vitri10g00450-mRNA-1:cds;Parent=vitri10g00450-mRNA-1
chr10_pilon_pilon	maker	five_prime_UTR	815317	815334	.	-	.	ID=vitri10g00450-mRNA-1:five_prime_utr;Parent=vitri10g00450-mRNA-1
chr10_pilon_pilon	maker	five_prime_UTR	815815	815869	.	-	.	ID=vitri10g00450-mRNA-1:five_prime_utr;Parent=vitri10g00450-mRNA-1
chr10_pilon_pilon	maker	five_prime_UTR	815959	816124	.	-	.	ID=vitri10g00450-mRNA-1:five_prime_utr;Parent=vitri10g00450-mRNA-1
chr10_pilon_pilon	maker	mRNA	809490	816124	.	-	.	ID=vitri10g00450-mRNA-2;Parent=vitri10g00450;Name=vitri10g00450-mRNA-2;_AED=0.22;_eAED=0.22;_QI=239|0.91|0.92|1|0.66|0.69|13|457|419;Note=Protein of unknown function;Dbxref=CDD:cd09034,Gene3D:G3DSA:1.25.40.280,InterPro:IPR004328,InterPro:IPR038499,InterPro:IPR038898,PANTHER:PTHR23032,PANTHER:PTHR23032:SF5,ProSiteProfiles:PS51180,SMART:SM01041
chr10_pilon_pilon	maker	three_prime_UTR	809490	809946	.	-	.	ID=vitri10g00450-mRNA-2:three_prime_utr;Parent=vitri10g00450-mRNA-2
chr10_pilon_pilon	maker	CDS	809947	810076	.	-	1	ID=vitri10g00450-mRNA-2:cds;Parent=vitri10g00450-mRNA-2
chr10_pilon_pilon	maker	CDS	810551	810652	.	-	1	ID=vitri10g00450-mRNA-2:cds;Parent=vitri10g00450-mRNA-2
chr10_pilon_pilon	maker	CDS	810821	810975	.	-	0	ID=vitri10g00450-mRNA-2:cds;Parent=vitri10g00450-mRNA-2
chr10_pilon_pilon	maker	CDS	811557	811646	.	-	0	ID=vitri10g00450-mRNA-2:cds;Parent=vitri10g00450-mRNA-2
chr10_pilon_pilon	maker	CDS	812272	812370	.	-	0	ID=vitri10g00450-mRNA-2:cds;Parent=vitri10g00450-mRNA-2
chr10_pilon_pilon	maker	CDS	812927	812993	.	-	1	ID=vitri10g00450-mRNA-2:cds;Parent=vitri10g00450-mRNA-2
chr10_pilon_pilon	maker	CDS	813113	813209	.	-	2	ID=vitri10g00450-mRNA-2:cds;Parent=vitri10g00450-mRNA-2
chr10_pilon_pilon	maker	exon	813922	814057	.	-	.	ID=vitri10g00450-mRNA-1:exon:221;Parent=vitri10g00450-mRNA-1,vitri10g00450-mRNA-2
chr10_pilon_pilon	maker	CDS	813922	814057	.	-	0	ID=vitri10g00450-mRNA-2:cds;Parent=vitri10g00450-mRNA-2
chr10_pilon_pilon	maker	exon	814147	814205	.	-	.	ID=vitri10g00450-mRNA-1:exon:220;Parent=vitri10g00450-mRNA-1,vitri10g00450-mRNA-2
chr10_pilon_pilon	maker	CDS	814147	814205	.	-	2	ID=vitri10g00450-mRNA-2:cds;Parent=vitri10g00450-mRNA-2
chr10_pilon_pilon	maker	exon	814901	814975	.	-	.	ID=vitri10g00450-mRNA-1:exon:219;Parent=vitri10g00450-mRNA-1,vitri10g00450-mRNA-2
chr10_pilon_pilon	maker	CDS	814901	814975	.	-	2	ID=vitri10g00450-mRNA-2:cds;Parent=vitri10g00450-mRNA-2
chr10_pilon_pilon	maker	CDS	815067	815316	.	-	0	ID=vitri10g00450-mRNA-2:cds;Parent=vitri10g00450-mRNA-2
chr10_pilon_pilon	maker	five_prime_UTR	815317	815334	.	-	.	ID=vitri10g00450-mRNA-2:five_prime_utr;Parent=vitri10g00450-mRNA-2
chr10_pilon_pilon	maker	five_prime_UTR	815815	815869	.	-	.	ID=vitri10g00450-mRNA-2:five_prime_utr;Parent=vitri10g00450-mRNA-2
chr10_pilon_pilon	maker	five_prime_UTR	815959	816124	.	-	.	ID=vitri10g00450-mRNA-2:five_prime_utr;Parent=vitri10g00450-mRNA-2
chr10_pilon_pilon	maker	mRNA	809490	816124	.	-	.	ID=vitri10g00450-mRNA-3;Parent=vitri10g00450;Name=vitri10g00450-mRNA-3;_AED=0.22;_eAED=0.22;_QI=239|0.81|0.75|1|0.54|0.5|12|457|414;Note=Protein of unknown function;Dbxref=Gene3D:G3DSA:1.25.40.280,InterPro:IPR004328,InterPro:IPR038499,InterPro:IPR038898,PANTHER:PTHR23032,PANTHER:PTHR23032:SF5,SMART:SM01041
chr10_pilon_pilon	maker	three_prime_UTR	809490	809946	.	-	.	ID=vitri10g00450-mRNA-3:three_prime_utr;Parent=vitri10g00450-mRNA-3
chr10_pilon_pilon	maker	CDS	809947	810076	.	-	1	ID=vitri10g00450-mRNA-3:cds;Parent=vitri10g00450-mRNA-3
chr10_pilon_pilon	maker	CDS	810551	810652	.	-	1	ID=vitri10g00450-mRNA-3:cds;Parent=vitri10g00450-mRNA-3
chr10_pilon_pilon	maker	CDS	810821	810975	.	-	0	ID=vitri10g00450-mRNA-3:cds;Parent=vitri10g00450-mRNA-3
chr10_pilon_pilon	maker	exon	811557	811673	.	-	.	ID=vitri10g00450-mRNA-1:exon:225;Parent=vitri10g00450-mRNA-1,vitri10g00450-mRNA-3
chr10_pilon_pilon	maker	CDS	811557	811673	.	-	0	ID=vitri10g00450-mRNA-3:cds;Parent=vitri10g00450-mRNA-3
chr10_pilon_pilon	maker	CDS	812272	812370	.	-	0	ID=vitri10g00450-mRNA-3:cds;Parent=vitri10g00450-mRNA-3
chr10_pilon_pilon	maker	CDS	812927	812993	.	-	1	ID=vitri10g00450-mRNA-3:cds;Parent=vitri10g00450-mRNA-3
chr10_pilon_pilon	maker	CDS	813113	813209	.	-	2	ID=vitri10g00450-mRNA-3:cds;Parent=vitri10g00450-mRNA-3
chr10_pilon_pilon	maker	CDS	813922	814070	.	-	1	ID=vitri10g00450-mRNA-3:cds;Parent=vitri10g00450-mRNA-3
chr10_pilon_pilon	maker	CDS	814897	814975	.	-	2	ID=vitri10g00450-mRNA-3:cds;Parent=vitri10g00450-mRNA-3
chr10_pilon_pilon	maker	CDS	815067	815316	.	-	0	ID=vitri10g00450-mRNA-3:cds;Parent=vitri10g00450-mRNA-3
chr10_pilon_pilon	maker	five_prime_UTR	815317	815334	.	-	.	ID=vitri10g00450-mRNA-3:five_prime_utr;Parent=vitri10g00450-mRNA-3
chr10_pilon_pilon	maker	five_prime_UTR	815815	815869	.	-	.	ID=vitri10g00450-mRNA-3:five_prime_utr;Parent=vitri10g00450-mRNA-3
chr10_pilon_pilon	maker	five_prime_UTR	815959	816124	.	-	.	ID=vitri10g00450-mRNA-3:five_prime_utr;Parent=vitri10g00450-mRNA-3
chr10_pilon_pilon	maker	mRNA	809490	816124	.	-	.	ID=vitri10g00450-mRNA-4;Parent=vitri10g00450;Name=vitri10g00450-mRNA-4;_AED=0.23;_eAED=0.23;_QI=239|0.90|0.83|1|0.54|0.5|12|457|405;Note=Protein of unknown function;Dbxref=Gene3D:G3DSA:1.25.40.280,InterPro:IPR004328,InterPro:IPR038499,InterPro:IPR038898,PANTHER:PTHR23032,PANTHER:PTHR23032:SF5,SMART:SM01041
chr10_pilon_pilon	maker	three_prime_UTR	809490	809946	.	-	.	ID=vitri10g00450-mRNA-4:three_prime_utr;Parent=vitri10g00450-mRNA-4
chr10_pilon_pilon	maker	exon	809490	810076	.	-	.	ID=vitri10g00450-mRNA-1:exon:228;Parent=vitri10g00450-mRNA-1,vitri10g00450-mRNA-2,vitri10g00450-mRNA-3,vitri10g00450-mRNA-4
chr10_pilon_pilon	maker	CDS	809947	810076	.	-	1	ID=vitri10g00450-mRNA-4:cds;Parent=vitri10g00450-mRNA-4
chr10_pilon_pilon	maker	exon	810551	810652	.	-	.	ID=vitri10g00450-mRNA-1:exon:227;Parent=vitri10g00450-mRNA-1,vitri10g00450-mRNA-2,vitri10g00450-mRNA-3,vitri10g00450-mRNA-4
chr10_pilon_pilon	maker	CDS	810551	810652	.	-	1	ID=vitri10g00450-mRNA-4:cds;Parent=vitri10g00450-mRNA-4
chr10_pilon_pilon	maker	exon	810821	810975	.	-	.	ID=vitri10g00450-mRNA-1:exon:226;Parent=vitri10g00450-mRNA-1,vitri10g00450-mRNA-2,vitri10g00450-mRNA-3,vitri10g00450-mRNA-4
chr10_pilon_pilon	maker	CDS	810821	810975	.	-	0	ID=vitri10g00450-mRNA-4:cds;Parent=vitri10g00450-mRNA-4
chr10_pilon_pilon	maker	exon	811557	811646	.	-	.	ID=vitri10g00450-mRNA-2:exon:229;Parent=vitri10g00450-mRNA-2,vitri10g00450-mRNA-4
chr10_pilon_pilon	maker	CDS	811557	811646	.	-	0	ID=vitri10g00450-mRNA-4:cds;Parent=vitri10g00450-mRNA-4
chr10_pilon_pilon	maker	exon	812272	812370	.	-	.	ID=vitri10g00450-mRNA-1:exon:224;Parent=vitri10g00450-mRNA-1,vitri10g00450-mRNA-2,vitri10g00450-mRNA-3,vitri10g00450-mRNA-4
chr10_pilon_pilon	maker	CDS	812272	812370	.	-	0	ID=vitri10g00450-mRNA-4:cds;Parent=vitri10g00450-mRNA-4
chr10_pilon_pilon	maker	exon	812927	812993	.	-	.	ID=vitri10g00450-mRNA-1:exon:223;Parent=vitri10g00450-mRNA-1,vitri10g00450-mRNA-2,vitri10g00450-mRNA-3,vitri10g00450-mRNA-4
chr10_pilon_pilon	maker	CDS	812927	812993	.	-	1	ID=vitri10g00450-mRNA-4:cds;Parent=vitri10g00450-mRNA-4
chr10_pilon_pilon	maker	exon	813113	813209	.	-	.	ID=vitri10g00450-mRNA-1:exon:222;Parent=vitri10g00450-mRNA-1,vitri10g00450-mRNA-2,vitri10g00450-mRNA-3,vitri10g00450-mRNA-4
chr10_pilon_pilon	maker	CDS	813113	813209	.	-	2	ID=vitri10g00450-mRNA-4:cds;Parent=vitri10g00450-mRNA-4
chr10_pilon_pilon	maker	exon	813922	814070	.	-	.	ID=vitri10g00450-mRNA-3:exon:231;Parent=vitri10g00450-mRNA-3,vitri10g00450-mRNA-4
chr10_pilon_pilon	maker	CDS	813922	814070	.	-	1	ID=vitri10g00450-mRNA-4:cds;Parent=vitri10g00450-mRNA-4
chr10_pilon_pilon	maker	exon	814897	814975	.	-	.	ID=vitri10g00450-mRNA-3:exon:230;Parent=vitri10g00450-mRNA-3,vitri10g00450-mRNA-4
chr10_pilon_pilon	maker	CDS	814897	814975	.	-	2	ID=vitri10g00450-mRNA-4:cds;Parent=vitri10g00450-mRNA-4
chr10_pilon_pilon	maker	CDS	815067	815316	.	-	0	ID=vitri10g00450-mRNA-4:cds;Parent=vitri10g00450-mRNA-4
chr10_pilon_pilon	maker	exon	815067	815334	.	-	.	ID=vitri10g00450-mRNA-1:exon:218;Parent=vitri10g00450-mRNA-1,vitri10g00450-mRNA-2,vitri10g00450-mRNA-3,vitri10g00450-mRNA-4
chr10_pilon_pilon	maker	five_prime_UTR	815317	815334	.	-	.	ID=vitri10g00450-mRNA-4:five_prime_utr;Parent=vitri10g00450-mRNA-4
chr10_pilon_pilon	maker	exon	815815	815869	.	-	.	ID=vitri10g00450-mRNA-1:exon:217;Parent=vitri10g00450-mRNA-1,vitri10g00450-mRNA-2,vitri10g00450-mRNA-3,vitri10g00450-mRNA-4
chr10_pilon_pilon	maker	five_prime_UTR	815815	815869	.	-	.	ID=vitri10g00450-mRNA-4:five_prime_utr;Parent=vitri10g00450-mRNA-4
chr10_pilon_pilon	maker	exon	815959	816124	.	-	.	ID=vitri10g00450-mRNA-1:exon:216;Parent=vitri10g00450-mRNA-1,vitri10g00450-mRNA-2,vitri10g00450-mRNA-3,vitri10g00450-mRNA-4
chr10_pilon_pilon	maker	five_prime_UTR	815959	816124	.	-	.	ID=vitri10g00450-mRNA-4:five_prime_utr;Parent=vitri10g00450-mRNA-4
###
chr10_pilon_pilon	maker	gene	835084	839720	.	+	.	ID=vitri10g00460;Name=vitri10g00460;Note=Similar to HMGB7: High mobility group B protein 7 (Arabidopsis thaliana OX%3D3702);Dbxref=CDD:cd01390,Coils:Coil,Gene3D:G3DSA:1.10.30.10,InterPro:IPR009071,InterPro:IPR036910,MobiDBLite:mobidb-lite,PANTHER:PTHR13711,PANTHER:PTHR13711:SF147,Pfam:PF00505,ProSiteProfiles:PS50118,SMART:SM00398,SUPERFAMILY:SSF47095
chr10_pilon_pilon	maker	mRNA	835084	839720	.	+	.	ID=vitri10g00460-mRNA-1;Parent=vitri10g00460;Name=vitri10g00460-mRNA-1;_AED=0.03;_eAED=0.03;_QI=0|1|0.87|1|1|1|8|2446|239;Note=Similar to HMGB7: High mobility group B protein 7 (Arabidopsis thaliana OX%3D3702);Dbxref=CDD:cd01390,Coils:Coil,Gene3D:G3DSA:1.10.30.10,InterPro:IPR009071,InterPro:IPR036910,MobiDBLite:mobidb-lite,PANTHER:PTHR13711,PANTHER:PTHR13711:SF147,Pfam:PF00505,ProSiteProfiles:PS50118,SMART:SM00398,SUPERFAMILY:SSF47095
chr10_pilon_pilon	maker	exon	835084	835316	.	+	.	ID=vitri10g00460-mRNA-1:exon:183;Parent=vitri10g00460-mRNA-1
chr10_pilon_pilon	maker	CDS	835084	835316	.	+	0	ID=vitri10g00460-mRNA-1:cds;Parent=vitri10g00460-mRNA-1
chr10_pilon_pilon	maker	exon	836133	836215	.	+	.	ID=vitri10g00460-mRNA-1:exon:184;Parent=vitri10g00460-mRNA-1
chr10_pilon_pilon	maker	CDS	836133	836215	.	+	1	ID=vitri10g00460-mRNA-1:cds;Parent=vitri10g00460-mRNA-1
chr10_pilon_pilon	maker	exon	836308	836359	.	+	.	ID=vitri10g00460-mRNA-1:exon:185;Parent=vitri10g00460-mRNA-1
chr10_pilon_pilon	maker	CDS	836308	836359	.	+	2	ID=vitri10g00460-mRNA-1:cds;Parent=vitri10g00460-mRNA-1
chr10_pilon_pilon	maker	exon	836446	836553	.	+	.	ID=vitri10g00460-mRNA-1:exon:186;Parent=vitri10g00460-mRNA-1
chr10_pilon_pilon	maker	CDS	836446	836553	.	+	1	ID=vitri10g00460-mRNA-1:cds;Parent=vitri10g00460-mRNA-1
chr10_pilon_pilon	maker	exon	836638	836695	.	+	.	ID=vitri10g00460-mRNA-1:exon:187;Parent=vitri10g00460-mRNA-1
chr10_pilon_pilon	maker	CDS	836638	836695	.	+	1	ID=vitri10g00460-mRNA-1:cds;Parent=vitri10g00460-mRNA-1
chr10_pilon_pilon	maker	exon	836907	836951	.	+	.	ID=vitri10g00460-mRNA-1:exon:188;Parent=vitri10g00460-mRNA-1
chr10_pilon_pilon	maker	CDS	836907	836951	.	+	0	ID=vitri10g00460-mRNA-1:cds;Parent=vitri10g00460-mRNA-1
chr10_pilon_pilon	maker	exon	837038	837124	.	+	.	ID=vitri10g00460-mRNA-1:exon:189;Parent=vitri10g00460-mRNA-1
chr10_pilon_pilon	maker	CDS	837038	837124	.	+	0	ID=vitri10g00460-mRNA-1:cds;Parent=vitri10g00460-mRNA-1
chr10_pilon_pilon	maker	CDS	837221	837274	.	+	0	ID=vitri10g00460-mRNA-1:cds;Parent=vitri10g00460-mRNA-1
chr10_pilon_pilon	maker	exon	837221	839720	.	+	.	ID=vitri10g00460-mRNA-1:exon:190;Parent=vitri10g00460-mRNA-1
chr10_pilon_pilon	maker	three_prime_UTR	837275	839720	.	+	.	ID=vitri10g00460-mRNA-1:three_prime_utr;Parent=vitri10g00460-mRNA-1
###
chr10_pilon_pilon	maker	gene	837724	839499	.	-	.	ID=vitri10g00470;Name=vitri10g00470;Note=Similar to PXC2: Leucine-rich repeat receptor-like protein kinase PXC2 (Arabidopsis thaliana OX%3D3702);Dbxref=Gene3D:G3DSA:3.80.10.10,InterPro:IPR001611,InterPro:IPR003591,InterPro:IPR013210,InterPro:IPR032675,PANTHER:PTHR43887,PANTHER:PTHR43887:SF22,Pfam:PF00560,Pfam:PF08263,Pfam:PF13855,SMART:SM00369,SUPERFAMILY:SSF52058,SignalP_EUK:SignalP-noTM;Ontology_term=GO:0005515
chr10_pilon_pilon	maker	mRNA	837724	839499	.	-	.	ID=vitri10g00470-mRNA-1;Parent=vitri10g00470;Name=vitri10g00470-mRNA-1;_AED=0.01;_eAED=0.01;_QI=0|-1|0|1|-1|1|1|0|591;Note=Similar to PXC2: Leucine-rich repeat receptor-like protein kinase PXC2 (Arabidopsis thaliana OX%3D3702);Dbxref=Gene3D:G3DSA:3.80.10.10,InterPro:IPR001611,InterPro:IPR003591,InterPro:IPR013210,InterPro:IPR032675,PANTHER:PTHR43887,PANTHER:PTHR43887:SF22,Pfam:PF00560,Pfam:PF08263,Pfam:PF13855,SMART:SM00369,SUPERFAMILY:SSF52058,SignalP_EUK:SignalP-noTM;Ontology_term=GO:0005515
chr10_pilon_pilon	maker	exon	837724	839499	.	-	.	ID=vitri10g00470-mRNA-1:exon:214;Parent=vitri10g00470-mRNA-1
chr10_pilon_pilon	maker	CDS	837724	839499	.	-	0	ID=vitri10g00470-mRNA-1:cds;Parent=vitri10g00470-mRNA-1
###
chr10_pilon_pilon	maker	gene	850600	854118	.	+	.	ID=vitri10g00480;Name=vitri10g00480;Note=Protein of unknown function;Dbxref=MobiDBLite:mobidb-lite
chr10_pilon_pilon	maker	mRNA	850600	854118	.	+	.	ID=vitri10g00480-mRNA-1;Parent=vitri10g00480;Name=vitri10g00480-mRNA-1;_AED=0.35;_eAED=1.00;_QI=0|0|0|0.66|1|1|3|0|253;Note=Protein of unknown function;Dbxref=MobiDBLite:mobidb-lite
chr10_pilon_pilon	maker	exon	850600	850847	.	+	.	ID=vitri10g00480-mRNA-1:exon:211;Parent=vitri10g00480-mRNA-1
chr10_pilon_pilon	maker	CDS	850600	850847	.	+	0	ID=vitri10g00480-mRNA-1:cds;Parent=vitri10g00480-mRNA-1
chr10_pilon_pilon	maker	exon	851183	851528	.	+	.	ID=vitri10g00480-mRNA-1:exon:212;Parent=vitri10g00480-mRNA-1
chr10_pilon_pilon	maker	CDS	851183	851528	.	+	1	ID=vitri10g00480-mRNA-1:cds;Parent=vitri10g00480-mRNA-1
chr10_pilon_pilon	maker	exon	853951	854118	.	+	.	ID=vitri10g00480-mRNA-1:exon:213;Parent=vitri10g00480-mRNA-1
chr10_pilon_pilon	maker	CDS	853951	854118	.	+	0	ID=vitri10g00480-mRNA-1:cds;Parent=vitri10g00480-mRNA-1
###
chr10_pilon_pilon	maker	gene	850647	854136	.	-	.	ID=vitri10g00490;Name=vitri10g00490;Note=Protein of unknown function;Dbxref=Gene3D:G3DSA:1.25.40.10,InterPro:IPR011990,PANTHER:PTHR37391,PANTHER:PTHR37391:SF2,SUPERFAMILY:SSF48452;Ontology_term=GO:0005515
chr10_pilon_pilon	maker	mRNA	850647	854136	.	-	.	ID=vitri10g00490-mRNA-1;Parent=vitri10g00490;Name=vitri10g00490-mRNA-1;_AED=0.08;_eAED=0.08;_QI=0|0|0|1|1|1|2|0|375;Note=Protein of unknown function;Dbxref=Gene3D:G3DSA:1.25.40.10,InterPro:IPR011990,PANTHER:PTHR37391,PANTHER:PTHR37391:SF2,SUPERFAMILY:SSF48452;Ontology_term=GO:0005515
chr10_pilon_pilon	maker	exon	850647	851540	.	-	.	ID=vitri10g00490-mRNA-1:exon:245;Parent=vitri10g00490-mRNA-1
chr10_pilon_pilon	maker	CDS	850647	851540	.	-	0	ID=vitri10g00490-mRNA-1:cds;Parent=vitri10g00490-mRNA-1
chr10_pilon_pilon	maker	exon	853903	854136	.	-	.	ID=vitri10g00490-mRNA-1:exon:246;Parent=vitri10g00490-mRNA-1
chr10_pilon_pilon	maker	CDS	853903	854136	.	-	0	ID=vitri10g00490-mRNA-1:cds;Parent=vitri10g00490-mRNA-1
###
chr10_pilon_pilon	maker	gene	864396	865211	.	-	.	ID=vitri10g00500;Name=vitri10g00500;Note=Protein of unknown function
chr10_pilon_pilon	maker	mRNA	864396	865211	.	-	.	ID=vitri10g00500-mRNA-1;Parent=vitri10g00500;Name=vitri10g00500-mRNA-1;_AED=0.15;_eAED=0.57;_QI=44|0|0|1|0|0|2|0|121;Note=Protein of unknown function
chr10_pilon_pilon	maker	exon	864396	864710	.	-	.	ID=vitri10g00500-mRNA-1:exon:232;Parent=vitri10g00500-mRNA-1
chr10_pilon_pilon	maker	CDS	864396	864710	.	-	0	ID=vitri10g00500-mRNA-1:cds;Parent=vitri10g00500-mRNA-1
chr10_pilon_pilon	maker	CDS	865120	865167	.	-	0	ID=vitri10g00500-mRNA-1:cds;Parent=vitri10g00500-mRNA-1
chr10_pilon_pilon	maker	exon	865120	865211	.	-	.	ID=vitri10g00500-mRNA-1:exon:233;Parent=vitri10g00500-mRNA-1
chr10_pilon_pilon	maker	five_prime_UTR	865168	865211	.	-	.	ID=vitri10g00500-mRNA-1:five_prime_utr;Parent=vitri10g00500-mRNA-1
###
chr10_pilon_pilon	maker	gene	867848	869128	.	-	.	ID=vitri10g00510;Name=vitri10g00510;Note=Protein of unknown function;Dbxref=InterPro:IPR011990,PANTHER:PTHR37391,PANTHER:PTHR37391:SF2,SUPERFAMILY:SSF48452;Ontology_term=GO:0005515
chr10_pilon_pilon	maker	mRNA	867848	869128	.	-	.	ID=vitri10g00510-mRNA-1;Parent=vitri10g00510;Name=vitri10g00510-mRNA-1;_AED=0.06;_eAED=0.06;_QI=0|-1|0|1|-1|1|1|0|426;Note=Protein of unknown function;Dbxref=InterPro:IPR011990,PANTHER:PTHR37391,PANTHER:PTHR37391:SF2,SUPERFAMILY:SSF48452;Ontology_term=GO:0005515
chr10_pilon_pilon	maker	exon	867848	869128	.	-	.	ID=vitri10g00510-mRNA-1:exon:215;Parent=vitri10g00510-mRNA-1
chr10_pilon_pilon	maker	CDS	867848	869128	.	-	0	ID=vitri10g00510-mRNA-1:cds;Parent=vitri10g00510-mRNA-1
###
chr10_pilon_pilon	maker	gene	868087	869090	.	+	.	ID=vitri10g00520;Name=vitri10g00520;Note=Protein of unknown function;Dbxref=MobiDBLite:mobidb-lite
chr10_pilon_pilon	maker	mRNA	868087	869090	.	+	.	ID=vitri10g00520-mRNA-1;Parent=vitri10g00520;Name=vitri10g00520-mRNA-1;_AED=0.27;_eAED=0.81;_QI=0|0|0|0.66|0.5|0.33|3|0|271;Note=Protein of unknown function;Dbxref=MobiDBLite:mobidb-lite
chr10_pilon_pilon	maker	exon	868087	868236	.	+	.	ID=vitri10g00520-mRNA-1:exon:208;Parent=vitri10g00520-mRNA-1
chr10_pilon_pilon	maker	CDS	868087	868236	.	+	0	ID=vitri10g00520-mRNA-1:cds;Parent=vitri10g00520-mRNA-1
chr10_pilon_pilon	maker	exon	868379	868927	.	+	.	ID=vitri10g00520-mRNA-1:exon:209;Parent=vitri10g00520-mRNA-1
chr10_pilon_pilon	maker	CDS	868379	868927	.	+	0	ID=vitri10g00520-mRNA-1:cds;Parent=vitri10g00520-mRNA-1
chr10_pilon_pilon	maker	exon	868974	869090	.	+	.	ID=vitri10g00520-mRNA-1:exon:210;Parent=vitri10g00520-mRNA-1
chr10_pilon_pilon	maker	CDS	868974	869090	.	+	0	ID=vitri10g00520-mRNA-1:cds;Parent=vitri10g00520-mRNA-1
###
chr10_pilon_pilon	maker	gene	912376	929423	.	+	.	ID=vitri10g00530;Name=vitri10g00530;Note=Similar to CHR28: Helicase-like transcription factor CHR28 (Arabidopsis thaliana OX%3D3702);Dbxref=CDD:cd00046,CDD:cd00079,Gene3D:G3DSA:3.30.40.10,Gene3D:G3DSA:3.40.50.10810,InterPro:IPR000330,InterPro:IPR001650,InterPro:IPR001841,InterPro:IPR013083,InterPro:IPR014001,InterPro:IPR017907,InterPro:IPR027417,InterPro:IPR038718,MobiDBLite:mobidb-lite,PANTHER:PTHR10799,PANTHER:PTHR10799:SF777,Pfam:PF00176,Pfam:PF00271,Pfam:PF13920,ProSitePatterns:PS00518,ProSiteProfiles:PS50089,ProSiteProfiles:PS51192,ProSiteProfiles:PS51194,SMART:SM00184,SMART:SM00487,SMART:SM00490,SUPERFAMILY:SSF52540,SUPERFAMILY:SSF57850;Ontology_term=GO:0005524
chr10_pilon_pilon	maker	mRNA	912376	929423	.	+	.	ID=vitri10g00530-mRNA-1;Parent=vitri10g00530;Name=vitri10g00530-mRNA-1;_AED=0.09;_eAED=0.11;_QI=0|0.9|0.90|1|0.8|0.81|11|307|1081;Note=Similar to CHR28: Helicase-like transcription factor CHR28 (Arabidopsis thaliana OX%3D3702);Dbxref=CDD:cd00046,CDD:cd00079,Gene3D:G3DSA:3.30.40.10,Gene3D:G3DSA:3.40.50.10810,InterPro:IPR000330,InterPro:IPR001650,InterPro:IPR001841,InterPro:IPR013083,InterPro:IPR014001,InterPro:IPR017907,InterPro:IPR027417,InterPro:IPR038718,MobiDBLite:mobidb-lite,PANTHER:PTHR10799,PANTHER:PTHR10799:SF777,Pfam:PF00176,Pfam:PF00271,Pfam:PF13920,ProSitePatterns:PS00518,ProSiteProfiles:PS50089,ProSiteProfiles:PS51192,ProSiteProfiles:PS51194,SMART:SM00184,SMART:SM00487,SMART:SM00490,SUPERFAMILY:SSF52540,SUPERFAMILY:SSF57850;Ontology_term=GO:0005524
chr10_pilon_pilon	maker	exon	912376	912453	.	+	.	ID=vitri10g00530-mRNA-1:exon:195;Parent=vitri10g00530-mRNA-1
chr10_pilon_pilon	maker	CDS	912376	912453	.	+	0	ID=vitri10g00530-mRNA-1:cds;Parent=vitri10g00530-mRNA-1
chr10_pilon_pilon	maker	exon	912522	912738	.	+	.	ID=vitri10g00530-mRNA-1:exon:196;Parent=vitri10g00530-mRNA-1
chr10_pilon_pilon	maker	CDS	912522	912738	.	+	0	ID=vitri10g00530-mRNA-1:cds;Parent=vitri10g00530-mRNA-1
chr10_pilon_pilon	maker	exon	912847	913481	.	+	.	ID=vitri10g00530-mRNA-1:exon:197;Parent=vitri10g00530-mRNA-1
chr10_pilon_pilon	maker	CDS	912847	913481	.	+	2	ID=vitri10g00530-mRNA-1:cds;Parent=vitri10g00530-mRNA-1
chr10_pilon_pilon	maker	exon	916549	916620	.	+	.	ID=vitri10g00530-mRNA-1:exon:198;Parent=vitri10g00530-mRNA-1
chr10_pilon_pilon	maker	CDS	916549	916620	.	+	0	ID=vitri10g00530-mRNA-1:cds;Parent=vitri10g00530-mRNA-1
chr10_pilon_pilon	maker	exon	916784	916861	.	+	.	ID=vitri10g00530-mRNA-1:exon:199;Parent=vitri10g00530-mRNA-1
chr10_pilon_pilon	maker	CDS	916784	916861	.	+	0	ID=vitri10g00530-mRNA-1:cds;Parent=vitri10g00530-mRNA-1
chr10_pilon_pilon	maker	exon	916968	917877	.	+	.	ID=vitri10g00530-mRNA-1:exon:200;Parent=vitri10g00530-mRNA-1
chr10_pilon_pilon	maker	CDS	916968	917877	.	+	0	ID=vitri10g00530-mRNA-1:cds;Parent=vitri10g00530-mRNA-1
chr10_pilon_pilon	maker	exon	920007	920137	.	+	.	ID=vitri10g00530-mRNA-1:exon:201;Parent=vitri10g00530-mRNA-1
chr10_pilon_pilon	maker	CDS	920007	920137	.	+	2	ID=vitri10g00530-mRNA-1:cds;Parent=vitri10g00530-mRNA-1
chr10_pilon_pilon	maker	exon	922661	922879	.	+	.	ID=vitri10g00530-mRNA-1:exon:202;Parent=vitri10g00530-mRNA-1
chr10_pilon_pilon	maker	CDS	922661	922879	.	+	0	ID=vitri10g00530-mRNA-1:cds;Parent=vitri10g00530-mRNA-1
chr10_pilon_pilon	maker	exon	925542	926132	.	+	.	ID=vitri10g00530-mRNA-1:exon:203;Parent=vitri10g00530-mRNA-1
chr10_pilon_pilon	maker	CDS	925542	926132	.	+	0	ID=vitri10g00530-mRNA-1:cds;Parent=vitri10g00530-mRNA-1
chr10_pilon_pilon	maker	exon	926436	926645	.	+	.	ID=vitri10g00530-mRNA-1:exon:204;Parent=vitri10g00530-mRNA-1
chr10_pilon_pilon	maker	CDS	926436	926645	.	+	0	ID=vitri10g00530-mRNA-1:cds;Parent=vitri10g00530-mRNA-1
chr10_pilon_pilon	maker	CDS	929012	929116	.	+	0	ID=vitri10g00530-mRNA-1:cds;Parent=vitri10g00530-mRNA-1
chr10_pilon_pilon	maker	exon	929012	929423	.	+	.	ID=vitri10g00530-mRNA-1:exon:205;Parent=vitri10g00530-mRNA-1
chr10_pilon_pilon	maker	three_prime_UTR	929117	929423	.	+	.	ID=vitri10g00530-mRNA-1:three_prime_utr;Parent=vitri10g00530-mRNA-1
###
chr10_pilon_pilon	maker	gene	930551	933129	.	-	.	ID=vitri10g00540;Name=vitri10g00540;Note=Similar to ASPG2: Protein ASPARTIC PROTEASE IN GUARD CELL 2 (Arabidopsis thaliana OX%3D3702);Dbxref=Gene3D:G3DSA:2.40.70.10,InterPro:IPR001461,InterPro:IPR021109,InterPro:IPR032799,InterPro:IPR032861,InterPro:IPR033121,PANTHER:PTHR13683,PANTHER:PTHR13683:SF265,Pfam:PF14541,Pfam:PF14543,ProSiteProfiles:PS51767,SUPERFAMILY:SSF50630;Ontology_term=GO:0004190,GO:0006508
chr10_pilon_pilon	maker	mRNA	930551	933129	.	-	.	ID=vitri10g00540-mRNA-1;Parent=vitri10g00540;Name=vitri10g00540-mRNA-1;_AED=0.17;_eAED=0.17;_QI=0|0|0|0.66|1|1|3|0|475;Note=Similar to ASPG2: Protein ASPARTIC PROTEASE IN GUARD CELL 2 (Arabidopsis thaliana OX%3D3702);Dbxref=Gene3D:G3DSA:2.40.70.10,InterPro:IPR001461,InterPro:IPR021109,InterPro:IPR032799,InterPro:IPR032861,InterPro:IPR033121,PANTHER:PTHR13683,PANTHER:PTHR13683:SF265,Pfam:PF14541,Pfam:PF14543,ProSiteProfiles:PS51767,SUPERFAMILY:SSF50630;Ontology_term=GO:0004190,GO:0006508
chr10_pilon_pilon	maker	exon	930551	930656	.	-	.	ID=vitri10g00540-mRNA-1:exon:217;Parent=vitri10g00540-mRNA-1
chr10_pilon_pilon	maker	CDS	930551	930656	.	-	1	ID=vitri10g00540-mRNA-1:cds;Parent=vitri10g00540-mRNA-1
chr10_pilon_pilon	maker	exon	931752	932339	.	-	.	ID=vitri10g00540-mRNA-1:exon:218;Parent=vitri10g00540-mRNA-1
chr10_pilon_pilon	maker	CDS	931752	932339	.	-	1	ID=vitri10g00540-mRNA-1:cds;Parent=vitri10g00540-mRNA-1
chr10_pilon_pilon	maker	exon	932396	933129	.	-	.	ID=vitri10g00540-mRNA-1:exon:219;Parent=vitri10g00540-mRNA-1
chr10_pilon_pilon	maker	CDS	932396	933129	.	-	0	ID=vitri10g00540-mRNA-1:cds;Parent=vitri10g00540-mRNA-1
###
chr10_pilon_pilon	maker	gene	953935	971322	.	-	.	ID=vitri10g00550;Name=vitri10g00550;Note=Similar to PRMT6: Probable protein arginine N-methyltransferase 6 (Arabidopsis thaliana OX%3D3702);Dbxref=CDD:cd02440,Gene3D:G3DSA:2.70.160.11,Gene3D:G3DSA:3.40.50.150,InterPro:IPR025799,InterPro:IPR029063,MobiDBLite:mobidb-lite,PANTHER:PTHR11006,PANTHER:PTHR11006:SF70,Pfam:PF06325,ProSiteProfiles:PS51678,SUPERFAMILY:SSF53335;Ontology_term=GO:0006479,GO:0008168
chr10_pilon_pilon	maker	mRNA	953935	971322	.	-	.	ID=vitri10g00550-mRNA-1;Parent=vitri10g00550;Name=vitri10g00550-mRNA-1;_AED=0.06;_eAED=0.06;_QI=0|0|0|1|0.7|0.72|11|0|326;Note=Similar to PRMT6: Probable protein arginine N-methyltransferase 6 (Arabidopsis thaliana OX%3D3702);Dbxref=CDD:cd02440,Gene3D:G3DSA:2.70.160.11,Gene3D:G3DSA:3.40.50.150,InterPro:IPR025799,InterPro:IPR029063,MobiDBLite:mobidb-lite,PANTHER:PTHR11006,PANTHER:PTHR11006:SF70,Pfam:PF06325,ProSiteProfiles:PS51678,SUPERFAMILY:SSF53335;Ontology_term=GO:0006479,GO:0008168
chr10_pilon_pilon	maker	exon	953935	954029	.	-	.	ID=vitri10g00550-mRNA-1:exon:206;Parent=vitri10g00550-mRNA-1
chr10_pilon_pilon	maker	CDS	953935	954029	.	-	2	ID=vitri10g00550-mRNA-1:cds;Parent=vitri10g00550-mRNA-1
chr10_pilon_pilon	maker	exon	955228	955306	.	-	.	ID=vitri10g00550-mRNA-1:exon:207;Parent=vitri10g00550-mRNA-1
chr10_pilon_pilon	maker	CDS	955228	955306	.	-	0	ID=vitri10g00550-mRNA-1:cds;Parent=vitri10g00550-mRNA-1
chr10_pilon_pilon	maker	exon	955621	955698	.	-	.	ID=vitri10g00550-mRNA-1:exon:208;Parent=vitri10g00550-mRNA-1
chr10_pilon_pilon	maker	CDS	955621	955698	.	-	0	ID=vitri10g00550-mRNA-1:cds;Parent=vitri10g00550-mRNA-1
chr10_pilon_pilon	maker	exon	955878	955946	.	-	.	ID=vitri10g00550-mRNA-1:exon:209;Parent=vitri10g00550-mRNA-1
chr10_pilon_pilon	maker	CDS	955878	955946	.	-	0	ID=vitri10g00550-mRNA-1:cds;Parent=vitri10g00550-mRNA-1
chr10_pilon_pilon	maker	exon	961903	961968	.	-	.	ID=vitri10g00550-mRNA-1:exon:210;Parent=vitri10g00550-mRNA-1
chr10_pilon_pilon	maker	CDS	961903	961968	.	-	0	ID=vitri10g00550-mRNA-1:cds;Parent=vitri10g00550-mRNA-1
chr10_pilon_pilon	maker	exon	963280	963315	.	-	.	ID=vitri10g00550-mRNA-1:exon:211;Parent=vitri10g00550-mRNA-1
chr10_pilon_pilon	maker	CDS	963280	963315	.	-	0	ID=vitri10g00550-mRNA-1:cds;Parent=vitri10g00550-mRNA-1
chr10_pilon_pilon	maker	exon	964909	964977	.	-	.	ID=vitri10g00550-mRNA-1:exon:212;Parent=vitri10g00550-mRNA-1
chr10_pilon_pilon	maker	CDS	964909	964977	.	-	0	ID=vitri10g00550-mRNA-1:cds;Parent=vitri10g00550-mRNA-1
chr10_pilon_pilon	maker	exon	965722	965787	.	-	.	ID=vitri10g00550-mRNA-1:exon:213;Parent=vitri10g00550-mRNA-1
chr10_pilon_pilon	maker	CDS	965722	965787	.	-	0	ID=vitri10g00550-mRNA-1:cds;Parent=vitri10g00550-mRNA-1
chr10_pilon_pilon	maker	exon	969328	969544	.	-	.	ID=vitri10g00550-mRNA-1:exon:214;Parent=vitri10g00550-mRNA-1
chr10_pilon_pilon	maker	CDS	969328	969544	.	-	1	ID=vitri10g00550-mRNA-1:cds;Parent=vitri10g00550-mRNA-1
chr10_pilon_pilon	maker	exon	971096	971239	.	-	.	ID=vitri10g00550-mRNA-1:exon:215;Parent=vitri10g00550-mRNA-1
chr10_pilon_pilon	maker	CDS	971096	971239	.	-	1	ID=vitri10g00550-mRNA-1:cds;Parent=vitri10g00550-mRNA-1
chr10_pilon_pilon	maker	exon	971264	971322	.	-	.	ID=vitri10g00550-mRNA-1:exon:216;Parent=vitri10g00550-mRNA-1
chr10_pilon_pilon	maker	CDS	971264	971322	.	-	0	ID=vitri10g00550-mRNA-1:cds;Parent=vitri10g00550-mRNA-1
###
chr10_pilon_pilon	maker	gene	971969	972616	.	+	.	ID=vitri10g00560;Name=vitri10g00560;Note=Protein of unknown function;Dbxref=Coils:Coil,MobiDBLite:mobidb-lite
chr10_pilon_pilon	maker	mRNA	971969	972616	.	+	.	ID=vitri10g00560-mRNA-1;Parent=vitri10g00560;Name=vitri10g00560-mRNA-1;_AED=0.41;_eAED=0.41;_QI=0|-1|0|1|-1|1|1|0|215;Note=Protein of unknown function;Dbxref=Coils:Coil,MobiDBLite:mobidb-lite
chr10_pilon_pilon	maker	exon	971969	972616	.	+	.	ID=vitri10g00560-mRNA-1:exon:273;Parent=vitri10g00560-mRNA-1
chr10_pilon_pilon	maker	CDS	971969	972616	.	+	0	ID=vitri10g00560-mRNA-1:cds;Parent=vitri10g00560-mRNA-1
###
chr10_pilon_pilon	maker	gene	992090	1002400	.	+	.	ID=vitri10g00570;Name=vitri10g00570;Note=Protein of unknown function;Dbxref=PANTHER:PTHR33176
chr10_pilon_pilon	maker	mRNA	992090	1002400	.	+	.	ID=vitri10g00570-mRNA-1;Parent=vitri10g00570;Name=vitri10g00570-mRNA-1;_AED=0.31;_eAED=0.37;_QI=0|0|0|0.83|0.18|0.33|12|0|1001;Note=Protein of unknown function;Dbxref=PANTHER:PTHR33176
chr10_pilon_pilon	maker	exon	992090	992205	.	+	.	ID=vitri10g00570-mRNA-1:exon:261;Parent=vitri10g00570-mRNA-1
chr10_pilon_pilon	maker	CDS	992090	992205	.	+	0	ID=vitri10g00570-mRNA-1:cds;Parent=vitri10g00570-mRNA-1
chr10_pilon_pilon	maker	exon	992219	992306	.	+	.	ID=vitri10g00570-mRNA-1:exon:262;Parent=vitri10g00570-mRNA-1
chr10_pilon_pilon	maker	CDS	992219	992306	.	+	1	ID=vitri10g00570-mRNA-1:cds;Parent=vitri10g00570-mRNA-1
chr10_pilon_pilon	maker	exon	992329	992706	.	+	.	ID=vitri10g00570-mRNA-1:exon:263;Parent=vitri10g00570-mRNA-1
chr10_pilon_pilon	maker	CDS	992329	992706	.	+	0	ID=vitri10g00570-mRNA-1:cds;Parent=vitri10g00570-mRNA-1
chr10_pilon_pilon	maker	exon	994391	994444	.	+	.	ID=vitri10g00570-mRNA-1:exon:264;Parent=vitri10g00570-mRNA-1
chr10_pilon_pilon	maker	CDS	994391	994444	.	+	0	ID=vitri10g00570-mRNA-1:cds;Parent=vitri10g00570-mRNA-1
chr10_pilon_pilon	maker	exon	996499	996609	.	+	.	ID=vitri10g00570-mRNA-1:exon:265;Parent=vitri10g00570-mRNA-1
chr10_pilon_pilon	maker	CDS	996499	996609	.	+	0	ID=vitri10g00570-mRNA-1:cds;Parent=vitri10g00570-mRNA-1
chr10_pilon_pilon	maker	exon	997507	997592	.	+	.	ID=vitri10g00570-mRNA-1:exon:266;Parent=vitri10g00570-mRNA-1
chr10_pilon_pilon	maker	CDS	997507	997592	.	+	0	ID=vitri10g00570-mRNA-1:cds;Parent=vitri10g00570-mRNA-1
chr10_pilon_pilon	maker	exon	997625	997900	.	+	.	ID=vitri10g00570-mRNA-1:exon:267;Parent=vitri10g00570-mRNA-1
chr10_pilon_pilon	maker	CDS	997625	997900	.	+	1	ID=vitri10g00570-mRNA-1:cds;Parent=vitri10g00570-mRNA-1
chr10_pilon_pilon	maker	exon	997906	998017	.	+	.	ID=vitri10g00570-mRNA-1:exon:268;Parent=vitri10g00570-mRNA-1
chr10_pilon_pilon	maker	CDS	997906	998017	.	+	1	ID=vitri10g00570-mRNA-1:cds;Parent=vitri10g00570-mRNA-1
chr10_pilon_pilon	maker	exon	998030	998112	.	+	.	ID=vitri10g00570-mRNA-1:exon:269;Parent=vitri10g00570-mRNA-1
chr10_pilon_pilon	maker	CDS	998030	998112	.	+	0	ID=vitri10g00570-mRNA-1:cds;Parent=vitri10g00570-mRNA-1
chr10_pilon_pilon	maker	exon	998129	999344	.	+	.	ID=vitri10g00570-mRNA-1:exon:270;Parent=vitri10g00570-mRNA-1
chr10_pilon_pilon	maker	CDS	998129	999344	.	+	1	ID=vitri10g00570-mRNA-1:cds;Parent=vitri10g00570-mRNA-1
chr10_pilon_pilon	maker	exon	1001480	1001758	.	+	.	ID=vitri10g00570-mRNA-1:exon:271;Parent=vitri10g00570-mRNA-1
chr10_pilon_pilon	maker	CDS	1001480	1001758	.	+	0	ID=vitri10g00570-mRNA-1:cds;Parent=vitri10g00570-mRNA-1
chr10_pilon_pilon	maker	exon	1002194	1002400	.	+	.	ID=vitri10g00570-mRNA-1:exon:272;Parent=vitri10g00570-mRNA-1
chr10_pilon_pilon	maker	CDS	1002194	1002400	.	+	0	ID=vitri10g00570-mRNA-1:cds;Parent=vitri10g00570-mRNA-1
###
chr10_pilon_pilon	maker	gene	1022597	1065821	.	-	.	ID=vitri10g00580;Name=vitri10g00580;Note=Similar to calu: Calumenin (Xenopus tropicalis OX%3D8364);Dbxref=Gene3D:G3DSA:1.10.238.10,InterPro:IPR002048,InterPro:IPR011992,InterPro:IPR018247,PANTHER:PTHR10827,PANTHER:PTHR10827:SF53,Pfam:PF13202,Pfam:PF13499,Pfam:PF13833,ProSitePatterns:PS00018,ProSiteProfiles:PS50222,SMART:SM00054,SUPERFAMILY:SSF47473,SignalP_EUK:SignalP-noTM;Ontology_term=GO:0005509
chr10_pilon_pilon	maker	mRNA	1022597	1065821	.	-	.	ID=vitri10g00580-mRNA-1;Parent=vitri10g00580;Name=vitri10g00580-mRNA-1;_AED=0.27;_eAED=0.27;_QI=1364|0.71|0.75|0.75|0.28|0.62|8|0|100;Note=Protein of unknown function
chr10_pilon_pilon	maker	exon	1022597	1022605	.	-	.	ID=vitri10g00580-mRNA-1:exon:281;Parent=vitri10g00580-mRNA-1
chr10_pilon_pilon	maker	CDS	1022597	1022605	.	-	0	ID=vitri10g00580-mRNA-1:cds;Parent=vitri10g00580-mRNA-1
chr10_pilon_pilon	maker	exon	1048965	1049179	.	-	.	ID=vitri10g00580-mRNA-1:exon:280;Parent=vitri10g00580-mRNA-1
chr10_pilon_pilon	maker	CDS	1048965	1049179	.	-	2	ID=vitri10g00580-mRNA-1:cds;Parent=vitri10g00580-mRNA-1
chr10_pilon_pilon	maker	CDS	1050687	1050765	.	-	0	ID=vitri10g00580-mRNA-1:cds;Parent=vitri10g00580-mRNA-1
chr10_pilon_pilon	maker	five_prime_UTR	1050766	1050820	.	-	.	ID=vitri10g00580-mRNA-1:five_prime_utr;Parent=vitri10g00580-mRNA-1
chr10_pilon_pilon	maker	five_prime_UTR	1060467	1060563	.	-	.	ID=vitri10g00580-mRNA-1:five_prime_utr;Parent=vitri10g00580-mRNA-1
chr10_pilon_pilon	maker	five_prime_UTR	1060680	1060853	.	-	.	ID=vitri10g00580-mRNA-1:five_prime_utr;Parent=vitri10g00580-mRNA-1
chr10_pilon_pilon	maker	five_prime_UTR	1062576	1062641	.	-	.	ID=vitri10g00580-mRNA-1:five_prime_utr;Parent=vitri10g00580-mRNA-1
chr10_pilon_pilon	maker	five_prime_UTR	1062753	1062855	.	-	.	ID=vitri10g00580-mRNA-1:five_prime_utr;Parent=vitri10g00580-mRNA-1
chr10_pilon_pilon	maker	five_prime_UTR	1064953	1065821	.	-	.	ID=vitri10g00580-mRNA-1:five_prime_utr;Parent=vitri10g00580-mRNA-1
chr10_pilon_pilon	maker	mRNA	1050232	1065821	.	-	.	ID=vitri10g00580-mRNA-2;Parent=vitri10g00580;Name=vitri10g00580-mRNA-2;_AED=0.13;_eAED=0.13;_QI=313|1|1|1|0.33|0.57|7|382|372;Note=Protein of unknown function;Dbxref=Gene3D:G3DSA:1.10.238.10,InterPro:IPR002048,InterPro:IPR011992,InterPro:IPR018247,PANTHER:PTHR10827,PANTHER:PTHR10827:SF53,Pfam:PF13202,Pfam:PF13499,Pfam:PF13833,ProSitePatterns:PS00018,ProSiteProfiles:PS50222,SMART:SM00054,SUPERFAMILY:SSF47473,SignalP_EUK:SignalP-noTM;Ontology_term=GO:0005509
chr10_pilon_pilon	maker	exon	1050232	1050602	.	-	.	ID=vitri10g00580-mRNA-2:exon:282;Parent=vitri10g00580-mRNA-2
chr10_pilon_pilon	maker	three_prime_UTR	1050232	1050602	.	-	.	ID=vitri10g00580-mRNA-2:three_prime_utr;Parent=vitri10g00580-mRNA-2
chr10_pilon_pilon	maker	three_prime_UTR	1050687	1050697	.	-	.	ID=vitri10g00580-mRNA-2:three_prime_utr;Parent=vitri10g00580-mRNA-2
chr10_pilon_pilon	maker	CDS	1050698	1050820	.	-	0	ID=vitri10g00580-mRNA-2:cds;Parent=vitri10g00580-mRNA-2
chr10_pilon_pilon	maker	CDS	1060467	1060563	.	-	1	ID=vitri10g00580-mRNA-2:cds;Parent=vitri10g00580-mRNA-2
chr10_pilon_pilon	maker	CDS	1060680	1060853	.	-	1	ID=vitri10g00580-mRNA-2:cds;Parent=vitri10g00580-mRNA-2
chr10_pilon_pilon	maker	CDS	1062576	1062641	.	-	1	ID=vitri10g00580-mRNA-2:cds;Parent=vitri10g00580-mRNA-2
chr10_pilon_pilon	maker	CDS	1062753	1062855	.	-	2	ID=vitri10g00580-mRNA-2:cds;Parent=vitri10g00580-mRNA-2
chr10_pilon_pilon	maker	CDS	1064953	1065508	.	-	0	ID=vitri10g00580-mRNA-2:cds;Parent=vitri10g00580-mRNA-2
chr10_pilon_pilon	maker	five_prime_UTR	1065509	1065821	.	-	.	ID=vitri10g00580-mRNA-2:five_prime_utr;Parent=vitri10g00580-mRNA-2
chr10_pilon_pilon	maker	mRNA	1050232	1065821	.	-	.	ID=vitri10g00580-mRNA-3;Parent=vitri10g00580;Name=vitri10g00580-mRNA-3;_AED=0.14;_eAED=0.14;_QI=313|1|1|1|0.33|0.57|7|360|372;Note=Similar to calu: Calumenin (Xenopus tropicalis OX%3D8364);Dbxref=Gene3D:G3DSA:1.10.238.10,InterPro:IPR002048,InterPro:IPR011992,InterPro:IPR018247,PANTHER:PTHR10827,PANTHER:PTHR10827:SF53,Pfam:PF13202,Pfam:PF13499,Pfam:PF13833,ProSitePatterns:PS00018,ProSiteProfiles:PS50222,SMART:SM00054,SUPERFAMILY:SSF47473,SignalP_EUK:SignalP-noTM;Ontology_term=GO:0005509
chr10_pilon_pilon	maker	exon	1050232	1050580	.	-	.	ID=vitri10g00580-mRNA-3:exon:283;Parent=vitri10g00580-mRNA-3
chr10_pilon_pilon	maker	three_prime_UTR	1050232	1050580	.	-	.	ID=vitri10g00580-mRNA-3:three_prime_utr;Parent=vitri10g00580-mRNA-3
chr10_pilon_pilon	maker	three_prime_UTR	1050687	1050697	.	-	.	ID=vitri10g00580-mRNA-3:three_prime_utr;Parent=vitri10g00580-mRNA-3
chr10_pilon_pilon	maker	exon	1050687	1050820	.	-	.	ID=vitri10g00580-mRNA-1:exon:279;Parent=vitri10g00580-mRNA-1,vitri10g00580-mRNA-2,vitri10g00580-mRNA-3
chr10_pilon_pilon	maker	CDS	1050698	1050820	.	-	0	ID=vitri10g00580-mRNA-3:cds;Parent=vitri10g00580-mRNA-3
chr10_pilon_pilon	maker	exon	1060467	1060563	.	-	.	ID=vitri10g00580-mRNA-1:exon:278;Parent=vitri10g00580-mRNA-1,vitri10g00580-mRNA-2,vitri10g00580-mRNA-3
chr10_pilon_pilon	maker	CDS	1060467	1060563	.	-	1	ID=vitri10g00580-mRNA-3:cds;Parent=vitri10g00580-mRNA-3
chr10_pilon_pilon	maker	exon	1060680	1060853	.	-	.	ID=vitri10g00580-mRNA-1:exon:277;Parent=vitri10g00580-mRNA-1,vitri10g00580-mRNA-2,vitri10g00580-mRNA-3
chr10_pilon_pilon	maker	CDS	1060680	1060853	.	-	1	ID=vitri10g00580-mRNA-3:cds;Parent=vitri10g00580-mRNA-3
chr10_pilon_pilon	maker	exon	1062576	1062641	.	-	.	ID=vitri10g00580-mRNA-1:exon:276;Parent=vitri10g00580-mRNA-1,vitri10g00580-mRNA-2,vitri10g00580-mRNA-3
chr10_pilon_pilon	maker	CDS	1062576	1062641	.	-	1	ID=vitri10g00580-mRNA-3:cds;Parent=vitri10g00580-mRNA-3
chr10_pilon_pilon	maker	exon	1062753	1062855	.	-	.	ID=vitri10g00580-mRNA-1:exon:275;Parent=vitri10g00580-mRNA-1,vitri10g00580-mRNA-2,vitri10g00580-mRNA-3
chr10_pilon_pilon	maker	CDS	1062753	1062855	.	-	2	ID=vitri10g00580-mRNA-3:cds;Parent=vitri10g00580-mRNA-3
chr10_pilon_pilon	maker	CDS	1064953	1065508	.	-	0	ID=vitri10g00580-mRNA-3:cds;Parent=vitri10g00580-mRNA-3
chr10_pilon_pilon	maker	exon	1064953	1065821	.	-	.	ID=vitri10g00580-mRNA-1:exon:274;Parent=vitri10g00580-mRNA-1,vitri10g00580-mRNA-2,vitri10g00580-mRNA-3
chr10_pilon_pilon	maker	five_prime_UTR	1065509	1065821	.	-	.	ID=vitri10g00580-mRNA-3:five_prime_utr;Parent=vitri10g00580-mRNA-3
###
chr10_pilon_pilon	maker	gene	1023911	1024737	.	+	.	ID=vitri10g00590;Name=vitri10g00590;Note=Similar to CDC48B: Cell division control protein 48 homolog B (Arabidopsis thaliana OX%3D3702);Dbxref=Gene3D:G3DSA:1.10.8.60,Gene3D:G3DSA:3.40.50.300,InterPro:IPR003959,InterPro:IPR027417,PANTHER:PTHR23077,PANTHER:PTHR23077:SF117,Pfam:PF00004,SUPERFAMILY:SSF52540;Ontology_term=GO:0005524
chr10_pilon_pilon	maker	mRNA	1023911	1024737	.	+	.	ID=vitri10g00590-mRNA-1;Parent=vitri10g00590;Name=vitri10g00590-mRNA-1;_AED=0.21;_eAED=0.21;_QI=0|0|0|1|1|0.66|3|0|213;Note=Similar to CDC48B: Cell division control protein 48 homolog B (Arabidopsis thaliana OX%3D3702);Dbxref=Gene3D:G3DSA:1.10.8.60,Gene3D:G3DSA:3.40.50.300,InterPro:IPR003959,InterPro:IPR027417,PANTHER:PTHR23077,PANTHER:PTHR23077:SF117,Pfam:PF00004,SUPERFAMILY:SSF52540;Ontology_term=GO:0005524
chr10_pilon_pilon	maker	exon	1023911	1024009	.	+	.	ID=vitri10g00590-mRNA-1:exon:258;Parent=vitri10g00590-mRNA-1
chr10_pilon_pilon	maker	CDS	1023911	1024009	.	+	0	ID=vitri10g00590-mRNA-1:cds;Parent=vitri10g00590-mRNA-1
chr10_pilon_pilon	maker	exon	1024122	1024451	.	+	.	ID=vitri10g00590-mRNA-1:exon:259;Parent=vitri10g00590-mRNA-1
chr10_pilon_pilon	maker	CDS	1024122	1024451	.	+	0	ID=vitri10g00590-mRNA-1:cds;Parent=vitri10g00590-mRNA-1
chr10_pilon_pilon	maker	exon	1024525	1024737	.	+	.	ID=vitri10g00590-mRNA-1:exon:260;Parent=vitri10g00590-mRNA-1
chr10_pilon_pilon	maker	CDS	1024525	1024737	.	+	0	ID=vitri10g00590-mRNA-1:cds;Parent=vitri10g00590-mRNA-1
###
chr10_pilon_pilon	maker	gene	1047300	1049548	.	+	.	ID=vitri10g00600;Name=vitri10g00600;Note=Similar to pan: Proteasome-activating nucleotidase (Methanospirillum hungatei JF-1 (strain ATCC 27890 / DSM 864 / NBRC 100397 / JF-1) OX%3D323259);Dbxref=Gene3D:G3DSA:1.10.8.60,Gene3D:G3DSA:3.40.50.300,InterPro:IPR003959,InterPro:IPR003960,InterPro:IPR027417,PANTHER:PTHR23077,PANTHER:PTHR23077:SF117,Pfam:PF00004,ProSitePatterns:PS00674,SUPERFAMILY:SSF52540;Ontology_term=GO:0005524
chr10_pilon_pilon	maker	mRNA	1047300	1049548	.	+	.	ID=vitri10g00600-mRNA-1;Parent=vitri10g00600;Name=vitri10g00600-mRNA-1;_AED=0.00;_eAED=0.00;_QI=64|1|0.66|1|1|1|3|172|190;Note=Similar to pan: Proteasome-activating nucleotidase (Methanospirillum hungatei JF-1 (strain ATCC 27890 / DSM 864 / NBRC 100397 / JF-1) OX%3D323259);Dbxref=Gene3D:G3DSA:1.10.8.60,Gene3D:G3DSA:3.40.50.300,InterPro:IPR003959,InterPro:IPR003960,InterPro:IPR027417,PANTHER:PTHR23077,PANTHER:PTHR23077:SF117,Pfam:PF00004,ProSitePatterns:PS00674,SUPERFAMILY:SSF52540;Ontology_term=GO:0005524
chr10_pilon_pilon	maker	five_prime_UTR	1047300	1047363	.	+	.	ID=vitri10g00600-mRNA-1:five_prime_utr;Parent=vitri10g00600-mRNA-1
chr10_pilon_pilon	maker	exon	1047300	1047387	.	+	.	ID=vitri10g00600-mRNA-1:exon:248;Parent=vitri10g00600-mRNA-1
chr10_pilon_pilon	maker	CDS	1047364	1047387	.	+	0	ID=vitri10g00600-mRNA-1:cds;Parent=vitri10g00600-mRNA-1
chr10_pilon_pilon	maker	exon	1047548	1047625	.	+	.	ID=vitri10g00600-mRNA-1:exon:249;Parent=vitri10g00600-mRNA-1
chr10_pilon_pilon	maker	CDS	1047548	1047625	.	+	0	ID=vitri10g00600-mRNA-1:cds;Parent=vitri10g00600-mRNA-1
chr10_pilon_pilon	maker	CDS	1048906	1049376	.	+	0	ID=vitri10g00600-mRNA-1:cds;Parent=vitri10g00600-mRNA-1
chr10_pilon_pilon	maker	exon	1048906	1049548	.	+	.	ID=vitri10g00600-mRNA-1:exon:250;Parent=vitri10g00600-mRNA-1
chr10_pilon_pilon	maker	three_prime_UTR	1049377	1049548	.	+	.	ID=vitri10g00600-mRNA-1:three_prime_utr;Parent=vitri10g00600-mRNA-1
###
chr10_pilon_pilon	maker	gene	1056938	1065454	.	+	.	ID=vitri10g00610;Name=vitri10g00610;Note=Protein of unknown function;Dbxref=MobiDBLite:mobidb-lite
chr10_pilon_pilon	maker	mRNA	1056938	1065454	.	+	.	ID=vitri10g00610-mRNA-1;Parent=vitri10g00610;Name=vitri10g00610-mRNA-1;_AED=0.14;_eAED=0.14;_QI=0|0|0|0.33|1|1|3|0|195;Note=Protein of unknown function;Dbxref=MobiDBLite:mobidb-lite
chr10_pilon_pilon	maker	exon	1056938	1057053	.	+	.	ID=vitri10g00610-mRNA-1:exon:255;Parent=vitri10g00610-mRNA-1
chr10_pilon_pilon	maker	CDS	1056938	1057053	.	+	0	ID=vitri10g00610-mRNA-1:cds;Parent=vitri10g00610-mRNA-1
chr10_pilon_pilon	maker	exon	1061108	1061150	.	+	.	ID=vitri10g00610-mRNA-1:exon:256;Parent=vitri10g00610-mRNA-1
chr10_pilon_pilon	maker	CDS	1061108	1061150	.	+	1	ID=vitri10g00610-mRNA-1:cds;Parent=vitri10g00610-mRNA-1
chr10_pilon_pilon	maker	exon	1065026	1065454	.	+	.	ID=vitri10g00610-mRNA-1:exon:257;Parent=vitri10g00610-mRNA-1
chr10_pilon_pilon	maker	CDS	1065026	1065454	.	+	0	ID=vitri10g00610-mRNA-1:cds;Parent=vitri10g00610-mRNA-1
###
chr10_pilon_pilon	maker	gene	1077302	1087910	.	+	.	ID=vitri10g00620;Name=vitri10g00620;Note=Similar to SRM1: Transcription factor SRM1 (Arabidopsis thaliana OX%3D3702);Dbxref=CDD:cd00167,Gene3D:G3DSA:1.10.10.60,InterPro:IPR001005,InterPro:IPR006447,InterPro:IPR009057,InterPro:IPR017884,MobiDBLite:mobidb-lite,PANTHER:PTHR44191,PANTHER:PTHR44191:SF2,Pfam:PF00249,ProSiteProfiles:PS51293,SMART:SM00717,SUPERFAMILY:SSF46689,TIGRFAM:TIGR01557;Ontology_term=GO:0003677
chr10_pilon_pilon	maker	mRNA	1077302	1087910	.	+	.	ID=vitri10g00620-mRNA-1;Parent=vitri10g00620;Name=vitri10g00620-mRNA-1;_AED=0.13;_eAED=0.13;_QI=456|0|0.5|1|0.66|0.75|4|491|390;Note=Similar to SRM1: Transcription factor SRM1 (Arabidopsis thaliana OX%3D3702);Dbxref=CDD:cd00167,Gene3D:G3DSA:1.10.10.60,InterPro:IPR001005,InterPro:IPR006447,InterPro:IPR009057,InterPro:IPR017884,MobiDBLite:mobidb-lite,PANTHER:PTHR44191,PANTHER:PTHR44191:SF2,Pfam:PF00249,ProSiteProfiles:PS51293,SMART:SM00717,SUPERFAMILY:SSF46689,TIGRFAM:TIGR01557;Ontology_term=GO:0003677
chr10_pilon_pilon	maker	five_prime_UTR	1077302	1077757	.	+	.	ID=vitri10g00620-mRNA-1:five_prime_utr;Parent=vitri10g00620-mRNA-1
chr10_pilon_pilon	maker	exon	1077302	1078137	.	+	.	ID=vitri10g00620-mRNA-1:exon:251;Parent=vitri10g00620-mRNA-1
chr10_pilon_pilon	maker	CDS	1077758	1078137	.	+	0	ID=vitri10g00620-mRNA-1:cds;Parent=vitri10g00620-mRNA-1
chr10_pilon_pilon	maker	exon	1083919	1084013	.	+	.	ID=vitri10g00620-mRNA-1:exon:252;Parent=vitri10g00620-mRNA-1
chr10_pilon_pilon	maker	CDS	1083919	1084013	.	+	1	ID=vitri10g00620-mRNA-1:cds;Parent=vitri10g00620-mRNA-1
chr10_pilon_pilon	maker	exon	1085412	1085601	.	+	.	ID=vitri10g00620-mRNA-1:exon:253;Parent=vitri10g00620-mRNA-1
chr10_pilon_pilon	maker	CDS	1085412	1085601	.	+	2	ID=vitri10g00620-mRNA-1:cds;Parent=vitri10g00620-mRNA-1
chr10_pilon_pilon	maker	CDS	1086912	1087419	.	+	1	ID=vitri10g00620-mRNA-1:cds;Parent=vitri10g00620-mRNA-1
chr10_pilon_pilon	maker	exon	1086912	1087910	.	+	.	ID=vitri10g00620-mRNA-1:exon:254;Parent=vitri10g00620-mRNA-1
chr10_pilon_pilon	maker	three_prime_UTR	1087420	1087910	.	+	.	ID=vitri10g00620-mRNA-1:three_prime_utr;Parent=vitri10g00620-mRNA-1
###
chr10_pilon_pilon	maker	gene	1101800	1102563	.	+	.	ID=vitri10g00630;Name=vitri10g00630;Note=Protein of unknown function
chr10_pilon_pilon	maker	mRNA	1101800	1102563	.	+	.	ID=vitri10g00630-mRNA-1;Parent=vitri10g00630;Name=vitri10g00630-mRNA-1;_AED=0.28;_eAED=0.28;_QI=0|0|0|1|0|0|3|0|106;Note=Protein of unknown function
chr10_pilon_pilon	maker	exon	1101800	1101847	.	+	.	ID=vitri10g00630-mRNA-1:exon:294;Parent=vitri10g00630-mRNA-1
chr10_pilon_pilon	maker	CDS	1101800	1101847	.	+	0	ID=vitri10g00630-mRNA-1:cds;Parent=vitri10g00630-mRNA-1
chr10_pilon_pilon	maker	exon	1102238	1102334	.	+	.	ID=vitri10g00630-mRNA-1:exon:295;Parent=vitri10g00630-mRNA-1
chr10_pilon_pilon	maker	CDS	1102238	1102334	.	+	0	ID=vitri10g00630-mRNA-1:cds;Parent=vitri10g00630-mRNA-1
chr10_pilon_pilon	maker	exon	1102391	1102563	.	+	.	ID=vitri10g00630-mRNA-1:exon:296;Parent=vitri10g00630-mRNA-1
chr10_pilon_pilon	maker	CDS	1102391	1102563	.	+	2	ID=vitri10g00630-mRNA-1:cds;Parent=vitri10g00630-mRNA-1
###
chr10_pilon_pilon	maker	gene	1174068	1174429	.	+	.	ID=vitri10g00640;Name=vitri10g00640;Note=Protein of unknown function
chr10_pilon_pilon	maker	mRNA	1174068	1174429	.	+	.	ID=vitri10g00640-mRNA-1;Parent=vitri10g00640;Name=vitri10g00640-mRNA-1;_AED=0.09;_eAED=0.09;_QI=0|0|0|1|0|0|2|0|101;Note=Protein of unknown function
chr10_pilon_pilon	maker	exon	1174068	1174179	.	+	.	ID=vitri10g00640-mRNA-1:exon:297;Parent=vitri10g00640-mRNA-1
chr10_pilon_pilon	maker	CDS	1174068	1174179	.	+	0	ID=vitri10g00640-mRNA-1:cds;Parent=vitri10g00640-mRNA-1
chr10_pilon_pilon	maker	exon	1174236	1174429	.	+	.	ID=vitri10g00640-mRNA-1:exon:298;Parent=vitri10g00640-mRNA-1
chr10_pilon_pilon	maker	CDS	1174236	1174429	.	+	2	ID=vitri10g00640-mRNA-1:cds;Parent=vitri10g00640-mRNA-1
###
chr10_pilon_pilon	maker	gene	1254617	1255175	.	-	.	ID=vitri10g00650;Name=vitri10g00650;Note=Protein of unknown function
chr10_pilon_pilon	maker	mRNA	1254617	1255175	.	-	.	ID=vitri10g00650-mRNA-1;Parent=vitri10g00650;Name=vitri10g00650-mRNA-1;_AED=0.07;_eAED=0.47;_QI=0|0|0|1|0|0|2|0|75;Note=Protein of unknown function
chr10_pilon_pilon	maker	exon	1254617	1254757	.	-	.	ID=vitri10g00650-mRNA-1:exon:301;Parent=vitri10g00650-mRNA-1
chr10_pilon_pilon	maker	CDS	1254617	1254757	.	-	0	ID=vitri10g00650-mRNA-1:cds;Parent=vitri10g00650-mRNA-1
chr10_pilon_pilon	maker	exon	1255089	1255175	.	-	.	ID=vitri10g00650-mRNA-1:exon:302;Parent=vitri10g00650-mRNA-1
chr10_pilon_pilon	maker	CDS	1255089	1255175	.	-	0	ID=vitri10g00650-mRNA-1:cds;Parent=vitri10g00650-mRNA-1
###
chr10_pilon_pilon	maker	gene	1276788	1277779	.	-	.	ID=vitri10g00660;Name=vitri10g00660;Note=Similar to At1g50180: Putative disease resistance protein At1g50180 (Arabidopsis thaliana OX%3D3702);Dbxref=CDD:cd14798,InterPro:IPR038005,PANTHER:PTHR43886,PANTHER:PTHR43886:SF8
chr10_pilon_pilon	maker	mRNA	1276788	1277779	.	-	.	ID=vitri10g00660-mRNA-1;Parent=vitri10g00660;Name=vitri10g00660-mRNA-1;_AED=0.40;_eAED=0.40;_QI=0|0|0|1|1|1|2|0|282;Note=Similar to At1g50180: Putative disease resistance protein At1g50180 (Arabidopsis thaliana OX%3D3702);Dbxref=CDD:cd14798,InterPro:IPR038005,PANTHER:PTHR43886,PANTHER:PTHR43886:SF8
chr10_pilon_pilon	maker	exon	1276788	1277378	.	-	.	ID=vitri10g00660-mRNA-1:exon:299;Parent=vitri10g00660-mRNA-1
chr10_pilon_pilon	maker	CDS	1276788	1277378	.	-	0	ID=vitri10g00660-mRNA-1:cds;Parent=vitri10g00660-mRNA-1
chr10_pilon_pilon	maker	exon	1277522	1277779	.	-	.	ID=vitri10g00660-mRNA-1:exon:300;Parent=vitri10g00660-mRNA-1
chr10_pilon_pilon	maker	CDS	1277522	1277779	.	-	0	ID=vitri10g00660-mRNA-1:cds;Parent=vitri10g00660-mRNA-1
###
chr10_pilon_pilon	maker	gene	1298171	1303019	.	+	.	ID=vitri10g00670;Name=vitri10g00670;Note=Similar to murD: UDP-N-acetylmuramoylalanine--D-glutamate ligase (Bacillus cereus (strain 03BB102) OX%3D572264);Dbxref=Gene3D:G3DSA:3.40.1190.10,Gene3D:G3DSA:3.40.1390.10,Gene3D:G3DSA:3.90.190.20,InterPro:IPR004101,InterPro:IPR005863,InterPro:IPR013221,InterPro:IPR035911,InterPro:IPR036565,InterPro:IPR036615,PANTHER:PTHR43024,Pfam:PF02875,Pfam:PF08245,SUPERFAMILY:SSF53244,SUPERFAMILY:SSF53623,SUPERFAMILY:SSF63418,TIGRFAM:TIGR01143;Ontology_term=GO:0005524,GO:0005737,GO:0009058,GO:0016874,GO:0047480,GO:0071555
chr10_pilon_pilon	maker	mRNA	1298171	1302422	.	+	.	ID=vitri10g00670-mRNA-2;Parent=vitri10g00670;Name=vitri10g00670-mRNA-2;_AED=0.08;_eAED=0.08;_QI=4|1|1|1|0.5|0.4|5|1217|510;Note=Similar to murF: UDP-N-acetylmuramoyl-tripeptide--D-alanyl-D-alanine ligase (Bacillus subtilis (strain 168) OX%3D224308);Dbxref=Gene3D:G3DSA:3.40.1190.10,Gene3D:G3DSA:3.40.1390.10,Gene3D:G3DSA:3.90.190.20,InterPro:IPR004101,InterPro:IPR005863,InterPro:IPR013221,InterPro:IPR035911,InterPro:IPR036565,InterPro:IPR036615,PANTHER:PTHR43024,Pfam:PF02875,Pfam:PF08245,SUPERFAMILY:SSF53244,SUPERFAMILY:SSF53623,SUPERFAMILY:SSF63418,TIGRFAM:TIGR01143;Ontology_term=GO:0005524,GO:0005737,GO:0009058,GO:0016874,GO:0047480,GO:0071555
chr10_pilon_pilon	maker	five_prime_UTR	1298171	1298174	.	+	.	ID=vitri10g00670-mRNA-2:five_prime_utr;Parent=vitri10g00670-mRNA-2
chr10_pilon_pilon	maker	CDS	1298175	1299029	.	+	0	ID=vitri10g00670-mRNA-2:cds;Parent=vitri10g00670-mRNA-2
chr10_pilon_pilon	maker	CDS	1299261	1299361	.	+	0	ID=vitri10g00670-mRNA-2:cds;Parent=vitri10g00670-mRNA-2
chr10_pilon_pilon	maker	CDS	1300438	1301014	.	+	1	ID=vitri10g00670-mRNA-2:cds;Parent=vitri10g00670-mRNA-2
chr10_pilon_pilon	maker	three_prime_UTR	1301015	1301042	.	+	.	ID=vitri10g00670-mRNA-2:three_prime_utr;Parent=vitri10g00670-mRNA-2
chr10_pilon_pilon	maker	three_prime_UTR	1301122	1301215	.	+	.	ID=vitri10g00670-mRNA-2:three_prime_utr;Parent=vitri10g00670-mRNA-2
chr10_pilon_pilon	maker	exon	1301328	1302422	.	+	.	ID=vitri10g00670-mRNA-2:exon:333;Parent=vitri10g00670-mRNA-2
chr10_pilon_pilon	maker	three_prime_UTR	1301328	1302422	.	+	.	ID=vitri10g00670-mRNA-2:three_prime_utr;Parent=vitri10g00670-mRNA-2
chr10_pilon_pilon	maker	mRNA	1298171	1303019	.	+	.	ID=vitri10g00670-mRNA-1;Parent=vitri10g00670;Name=vitri10g00670-mRNA-1;_AED=0.04;_eAED=0.04;_QI=4|1|1|1|0.6|0.5|6|1447|510;Note=Similar to murD: UDP-N-acetylmuramoylalanine--D-glutamate ligase (Bacillus cereus (strain 03BB102) OX%3D572264);Dbxref=Gene3D:G3DSA:3.40.1190.10,Gene3D:G3DSA:3.40.1390.10,Gene3D:G3DSA:3.90.190.20,InterPro:IPR004101,InterPro:IPR005863,InterPro:IPR013221,InterPro:IPR035911,InterPro:IPR036565,InterPro:IPR036615,PANTHER:PTHR43024,Pfam:PF02875,Pfam:PF08245,SUPERFAMILY:SSF53244,SUPERFAMILY:SSF53623,SUPERFAMILY:SSF63418,TIGRFAM:TIGR01143;Ontology_term=GO:0005524,GO:0005737,GO:0009058,GO:0016874,GO:0047480,GO:0071555
chr10_pilon_pilon	maker	five_prime_UTR	1298171	1298174	.	+	.	ID=vitri10g00670-mRNA-1:five_prime_utr;Parent=vitri10g00670-mRNA-1
chr10_pilon_pilon	maker	exon	1298171	1299029	.	+	.	ID=vitri10g00670-mRNA-1:exon:327;Parent=vitri10g00670-mRNA-2,vitri10g00670-mRNA-1
chr10_pilon_pilon	maker	CDS	1298175	1299029	.	+	0	ID=vitri10g00670-mRNA-1:cds;Parent=vitri10g00670-mRNA-1
chr10_pilon_pilon	maker	exon	1299261	1299361	.	+	.	ID=vitri10g00670-mRNA-1:exon:328;Parent=vitri10g00670-mRNA-2,vitri10g00670-mRNA-1
chr10_pilon_pilon	maker	CDS	1299261	1299361	.	+	0	ID=vitri10g00670-mRNA-1:cds;Parent=vitri10g00670-mRNA-1
chr10_pilon_pilon	maker	CDS	1300438	1301014	.	+	1	ID=vitri10g00670-mRNA-1:cds;Parent=vitri10g00670-mRNA-1
chr10_pilon_pilon	maker	exon	1300438	1301042	.	+	.	ID=vitri10g00670-mRNA-1:exon:329;Parent=vitri10g00670-mRNA-2,vitri10g00670-mRNA-1
chr10_pilon_pilon	maker	three_prime_UTR	1301015	1301042	.	+	.	ID=vitri10g00670-mRNA-1:three_prime_utr;Parent=vitri10g00670-mRNA-1
chr10_pilon_pilon	maker	exon	1301122	1301215	.	+	.	ID=vitri10g00670-mRNA-1:exon:330;Parent=vitri10g00670-mRNA-2,vitri10g00670-mRNA-1
chr10_pilon_pilon	maker	three_prime_UTR	1301122	1301215	.	+	.	ID=vitri10g00670-mRNA-1:three_prime_utr;Parent=vitri10g00670-mRNA-1
chr10_pilon_pilon	maker	exon	1301294	1302226	.	+	.	ID=vitri10g00670-mRNA-1:exon:331;Parent=vitri10g00670-mRNA-1
chr10_pilon_pilon	maker	three_prime_UTR	1301294	1302226	.	+	.	ID=vitri10g00670-mRNA-1:three_prime_utr;Parent=vitri10g00670-mRNA-1
chr10_pilon_pilon	maker	exon	1302628	1303019	.	+	.	ID=vitri10g00670-mRNA-1:exon:332;Parent=vitri10g00670-mRNA-1
chr10_pilon_pilon	maker	three_prime_UTR	1302628	1303019	.	+	.	ID=vitri10g00670-mRNA-1:three_prime_utr;Parent=vitri10g00670-mRNA-1
###
chr10_pilon_pilon	maker	gene	1304665	1306898	.	+	.	ID=vitri10g00680;Name=vitri10g00680;Note=Similar to At4g01600: GEM-like protein 2 (Arabidopsis thaliana OX%3D3702);Dbxref=Gene3D:G3DSA:2.30.29.30,InterPro:IPR004182,InterPro:IPR011993,InterPro:IPR037848,PANTHER:PTHR31969,PANTHER:PTHR31969:SF32,Pfam:PF02893,SMART:SM00568
chr10_pilon_pilon	maker	mRNA	1304665	1306898	.	+	.	ID=vitri10g00680-mRNA-1;Parent=vitri10g00680;Name=vitri10g00680-mRNA-1;_AED=0.21;_eAED=0.21;_QI=205|0.8|0.66|1|0.6|0.66|6|0|263;Note=Similar to At4g01600: GEM-like protein 2 (Arabidopsis thaliana OX%3D3702);Dbxref=Gene3D:G3DSA:2.30.29.30,InterPro:IPR004182,InterPro:IPR011993,InterPro:IPR037848,PANTHER:PTHR31969,PANTHER:PTHR31969:SF32,Pfam:PF02893,SMART:SM00568
chr10_pilon_pilon	maker	exon	1304665	1304844	.	+	.	ID=vitri10g00680-mRNA-1:exon:346;Parent=vitri10g00680-mRNA-1
chr10_pilon_pilon	maker	five_prime_UTR	1304665	1304844	.	+	.	ID=vitri10g00680-mRNA-1:five_prime_utr;Parent=vitri10g00680-mRNA-1
chr10_pilon_pilon	maker	five_prime_UTR	1304875	1304899	.	+	.	ID=vitri10g00680-mRNA-1:five_prime_utr;Parent=vitri10g00680-mRNA-1
chr10_pilon_pilon	maker	exon	1304875	1304996	.	+	.	ID=vitri10g00680-mRNA-1:exon:347;Parent=vitri10g00680-mRNA-1
chr10_pilon_pilon	maker	CDS	1304900	1304996	.	+	0	ID=vitri10g00680-mRNA-1:cds;Parent=vitri10g00680-mRNA-1
chr10_pilon_pilon	maker	exon	1305105	1305185	.	+	.	ID=vitri10g00680-mRNA-1:exon:348;Parent=vitri10g00680-mRNA-1
chr10_pilon_pilon	maker	CDS	1305105	1305185	.	+	2	ID=vitri10g00680-mRNA-1:cds;Parent=vitri10g00680-mRNA-1
chr10_pilon_pilon	maker	exon	1305276	1305550	.	+	.	ID=vitri10g00680-mRNA-1:exon:349;Parent=vitri10g00680-mRNA-1
chr10_pilon_pilon	maker	CDS	1305276	1305550	.	+	2	ID=vitri10g00680-mRNA-1:cds;Parent=vitri10g00680-mRNA-1
chr10_pilon_pilon	maker	exon	1305641	1305827	.	+	.	ID=vitri10g00680-mRNA-1:exon:350;Parent=vitri10g00680-mRNA-1
chr10_pilon_pilon	maker	CDS	1305641	1305827	.	+	0	ID=vitri10g00680-mRNA-1:cds;Parent=vitri10g00680-mRNA-1
chr10_pilon_pilon	maker	exon	1306747	1306898	.	+	.	ID=vitri10g00680-mRNA-1:exon:351;Parent=vitri10g00680-mRNA-1
chr10_pilon_pilon	maker	CDS	1306747	1306898	.	+	2	ID=vitri10g00680-mRNA-1:cds;Parent=vitri10g00680-mRNA-1
###
chr10_pilon_pilon	maker	gene	1307318	1309152	.	-	.	ID=vitri10g00690;Name=vitri10g00690;Note=Protein of unknown function;Dbxref=Gene3D:G3DSA:2.130.10.10,Gene3D:G3DSA:4.10.1000.10,InterPro:IPR000571,InterPro:IPR015943,InterPro:IPR036322,InterPro:IPR036855,MobiDBLite:mobidb-lite,PANTHER:PTHR44050,PANTHER:PTHR44050:SF4,ProSiteProfiles:PS50103,SMART:SM00356,SUPERFAMILY:SSF50978,SUPERFAMILY:SSF90229;Ontology_term=GO:0005515,GO:0046872
chr10_pilon_pilon	maker	mRNA	1307318	1309152	.	-	.	ID=vitri10g00690-mRNA-1;Parent=vitri10g00690;Name=vitri10g00690-mRNA-1;_AED=0.09;_eAED=0.15;_QI=59|0.33|0.28|1|0.5|0.28|7|170|300;Note=Protein of unknown function;Dbxref=Gene3D:G3DSA:2.130.10.10,Gene3D:G3DSA:4.10.1000.10,InterPro:IPR000571,InterPro:IPR015943,InterPro:IPR036322,InterPro:IPR036855,MobiDBLite:mobidb-lite,PANTHER:PTHR44050,PANTHER:PTHR44050:SF4,ProSiteProfiles:PS50103,SMART:SM00356,SUPERFAMILY:SSF50978,SUPERFAMILY:SSF90229;Ontology_term=GO:0005515,GO:0046872
chr10_pilon_pilon	maker	three_prime_UTR	1307318	1307487	.	-	.	ID=vitri10g00690-mRNA-1:three_prime_utr;Parent=vitri10g00690-mRNA-1
chr10_pilon_pilon	maker	exon	1307318	1307530	.	-	.	ID=vitri10g00690-mRNA-1:exon:375;Parent=vitri10g00690-mRNA-1
chr10_pilon_pilon	maker	CDS	1307488	1307530	.	-	1	ID=vitri10g00690-mRNA-1:cds;Parent=vitri10g00690-mRNA-1
chr10_pilon_pilon	maker	exon	1307628	1307725	.	-	.	ID=vitri10g00690-mRNA-1:exon:374;Parent=vitri10g00690-mRNA-1
chr10_pilon_pilon	maker	CDS	1307628	1307725	.	-	0	ID=vitri10g00690-mRNA-1:cds;Parent=vitri10g00690-mRNA-1
chr10_pilon_pilon	maker	exon	1307824	1307883	.	-	.	ID=vitri10g00690-mRNA-1:exon:373;Parent=vitri10g00690-mRNA-1
chr10_pilon_pilon	maker	CDS	1307824	1307883	.	-	0	ID=vitri10g00690-mRNA-1:cds;Parent=vitri10g00690-mRNA-1
chr10_pilon_pilon	maker	exon	1308098	1308268	.	-	.	ID=vitri10g00690-mRNA-1:exon:372;Parent=vitri10g00690-mRNA-1
chr10_pilon_pilon	maker	CDS	1308098	1308268	.	-	0	ID=vitri10g00690-mRNA-1:cds;Parent=vitri10g00690-mRNA-1
chr10_pilon_pilon	maker	exon	1308541	1308839	.	-	.	ID=vitri10g00690-mRNA-1:exon:371;Parent=vitri10g00690-mRNA-1
chr10_pilon_pilon	maker	CDS	1308541	1308839	.	-	2	ID=vitri10g00690-mRNA-1:cds;Parent=vitri10g00690-mRNA-1
chr10_pilon_pilon	maker	exon	1308848	1308958	.	-	.	ID=vitri10g00690-mRNA-1:exon:370;Parent=vitri10g00690-mRNA-1
chr10_pilon_pilon	maker	CDS	1308848	1308958	.	-	2	ID=vitri10g00690-mRNA-1:cds;Parent=vitri10g00690-mRNA-1
chr10_pilon_pilon	maker	CDS	1308973	1309093	.	-	0	ID=vitri10g00690-mRNA-1:cds;Parent=vitri10g00690-mRNA-1
chr10_pilon_pilon	maker	exon	1308973	1309152	.	-	.	ID=vitri10g00690-mRNA-1:exon:369;Parent=vitri10g00690-mRNA-1
chr10_pilon_pilon	maker	five_prime_UTR	1309094	1309152	.	-	.	ID=vitri10g00690-mRNA-1:five_prime_utr;Parent=vitri10g00690-mRNA-1
###
chr10_pilon_pilon	maker	gene	1327727	1328167	.	+	.	ID=vitri10g00700;Name=vitri10g00700;Note=Protein of unknown function;Dbxref=MobiDBLite:mobidb-lite,PANTHER:PTHR44050,PANTHER:PTHR44050:SF4
chr10_pilon_pilon	maker	mRNA	1327727	1328167	.	+	.	ID=vitri10g00700-mRNA-1;Parent=vitri10g00700;Name=vitri10g00700-mRNA-1;_AED=0.45;_eAED=0.49;_QI=25|0|0|1|0|0|2|0|108;Note=Protein of unknown function;Dbxref=MobiDBLite:mobidb-lite,PANTHER:PTHR44050,PANTHER:PTHR44050:SF4
chr10_pilon_pilon	maker	five_prime_UTR	1327727	1327751	.	+	.	ID=vitri10g00700-mRNA-1:five_prime_utr;Parent=vitri10g00700-mRNA-1
chr10_pilon_pilon	maker	exon	1327727	1327808	.	+	.	ID=vitri10g00700-mRNA-1:exon:391;Parent=vitri10g00700-mRNA-1
chr10_pilon_pilon	maker	CDS	1327752	1327808	.	+	0	ID=vitri10g00700-mRNA-1:cds;Parent=vitri10g00700-mRNA-1
chr10_pilon_pilon	maker	exon	1327901	1328167	.	+	.	ID=vitri10g00700-mRNA-1:exon:392;Parent=vitri10g00700-mRNA-1
chr10_pilon_pilon	maker	CDS	1327901	1328167	.	+	0	ID=vitri10g00700-mRNA-1:cds;Parent=vitri10g00700-mRNA-1
###
chr10_pilon_pilon	maker	gene	1332196	1335300	.	+	.	ID=vitri10g00710;Name=vitri10g00710;Note=Similar to ZFWD1: Zinc finger CCCH domain-containing protein 48 (Arabidopsis thaliana OX%3D3702);Dbxref=Gene3D:G3DSA:2.130.10.10,Gene3D:G3DSA:4.10.1000.10,InterPro:IPR000571,InterPro:IPR001680,InterPro:IPR015943,InterPro:IPR017986,InterPro:IPR019775,InterPro:IPR020472,InterPro:IPR036322,InterPro:IPR036855,MobiDBLite:mobidb-lite,PANTHER:PTHR44050,PANTHER:PTHR44050:SF4,PRINTS:PR00320,Pfam:PF00400,ProSitePatterns:PS00678,ProSiteProfiles:PS50082,ProSiteProfiles:PS50103,ProSiteProfiles:PS50294,SMART:SM00320,SMART:SM00356,SUPERFAMILY:SSF50978,SUPERFAMILY:SSF90229;Ontology_term=GO:0005515,GO:0046872
chr10_pilon_pilon	maker	mRNA	1332196	1335300	.	+	.	ID=vitri10g00710-mRNA-1;Parent=vitri10g00710;Name=vitri10g00710-mRNA-1;_AED=0.21;_eAED=0.21;_QI=25|0.62|0.33|1|0.87|0.77|9|0|468;Note=Similar to ZFWD1: Zinc finger CCCH domain-containing protein 48 (Arabidopsis thaliana OX%3D3702);Dbxref=Gene3D:G3DSA:2.130.10.10,Gene3D:G3DSA:4.10.1000.10,InterPro:IPR000571,InterPro:IPR001680,InterPro:IPR015943,InterPro:IPR017986,InterPro:IPR019775,InterPro:IPR020472,InterPro:IPR036322,InterPro:IPR036855,MobiDBLite:mobidb-lite,PANTHER:PTHR44050,PANTHER:PTHR44050:SF4,PRINTS:PR00320,Pfam:PF00400,ProSitePatterns:PS00678,ProSiteProfiles:PS50082,ProSiteProfiles:PS50103,ProSiteProfiles:PS50294,SMART:SM00320,SMART:SM00356,SUPERFAMILY:SSF50978,SUPERFAMILY:SSF90229;Ontology_term=GO:0005515,GO:0046872
chr10_pilon_pilon	maker	exon	1332196	1332218	.	+	.	ID=vitri10g00710-mRNA-1:exon:352;Parent=vitri10g00710-mRNA-1
chr10_pilon_pilon	maker	five_prime_UTR	1332196	1332218	.	+	.	ID=vitri10g00710-mRNA-1:five_prime_utr;Parent=vitri10g00710-mRNA-1
chr10_pilon_pilon	maker	five_prime_UTR	1332611	1332612	.	+	.	ID=vitri10g00710-mRNA-1:five_prime_utr;Parent=vitri10g00710-mRNA-1
chr10_pilon_pilon	maker	exon	1332611	1333161	.	+	.	ID=vitri10g00710-mRNA-1:exon:353;Parent=vitri10g00710-mRNA-1
chr10_pilon_pilon	maker	CDS	1332613	1333161	.	+	0	ID=vitri10g00710-mRNA-1:cds;Parent=vitri10g00710-mRNA-1
chr10_pilon_pilon	maker	exon	1333252	1333437	.	+	.	ID=vitri10g00710-mRNA-1:exon:354;Parent=vitri10g00710-mRNA-1
chr10_pilon_pilon	maker	CDS	1333252	1333437	.	+	0	ID=vitri10g00710-mRNA-1:cds;Parent=vitri10g00710-mRNA-1
chr10_pilon_pilon	maker	exon	1333544	1333645	.	+	.	ID=vitri10g00710-mRNA-1:exon:355;Parent=vitri10g00710-mRNA-1
chr10_pilon_pilon	maker	CDS	1333544	1333645	.	+	0	ID=vitri10g00710-mRNA-1:cds;Parent=vitri10g00710-mRNA-1
chr10_pilon_pilon	maker	exon	1333905	1334051	.	+	.	ID=vitri10g00710-mRNA-1:exon:356;Parent=vitri10g00710-mRNA-1
chr10_pilon_pilon	maker	CDS	1333905	1334051	.	+	0	ID=vitri10g00710-mRNA-1:cds;Parent=vitri10g00710-mRNA-1
chr10_pilon_pilon	maker	exon	1334548	1334667	.	+	.	ID=vitri10g00710-mRNA-1:exon:357;Parent=vitri10g00710-mRNA-1
chr10_pilon_pilon	maker	CDS	1334548	1334667	.	+	0	ID=vitri10g00710-mRNA-1:cds;Parent=vitri10g00710-mRNA-1
chr10_pilon_pilon	maker	exon	1334751	1334810	.	+	.	ID=vitri10g00710-mRNA-1:exon:358;Parent=vitri10g00710-mRNA-1
chr10_pilon_pilon	maker	CDS	1334751	1334810	.	+	0	ID=vitri10g00710-mRNA-1:cds;Parent=vitri10g00710-mRNA-1
chr10_pilon_pilon	maker	exon	1334961	1335058	.	+	.	ID=vitri10g00710-mRNA-1:exon:359;Parent=vitri10g00710-mRNA-1
chr10_pilon_pilon	maker	CDS	1334961	1335058	.	+	0	ID=vitri10g00710-mRNA-1:cds;Parent=vitri10g00710-mRNA-1
chr10_pilon_pilon	maker	exon	1335156	1335300	.	+	.	ID=vitri10g00710-mRNA-1:exon:360;Parent=vitri10g00710-mRNA-1
chr10_pilon_pilon	maker	CDS	1335156	1335300	.	+	1	ID=vitri10g00710-mRNA-1:cds;Parent=vitri10g00710-mRNA-1
###
chr10_pilon_pilon	maker	gene	1336873	1344731	.	-	.	ID=vitri10g00720;Name=vitri10g00720;Note=Similar to At5g08350: GEM-like protein 4 (Arabidopsis thaliana OX%3D3702);Dbxref=Gene3D:G3DSA:2.30.29.30,InterPro:IPR004182,InterPro:IPR011993,InterPro:IPR037848,PANTHER:PTHR31969,PANTHER:PTHR31969:SF32,Pfam:PF02893,SMART:SM00568
chr10_pilon_pilon	maker	mRNA	1336873	1344731	.	-	.	ID=vitri10g00720-mRNA-1;Parent=vitri10g00720;Name=vitri10g00720-mRNA-1;_AED=0.24;_eAED=0.35;_QI=38|0.5|0.42|1|0.66|0.57|7|0|445;Note=Similar to At5g08350: GEM-like protein 4 (Arabidopsis thaliana OX%3D3702);Dbxref=Gene3D:G3DSA:2.30.29.30,InterPro:IPR004182,InterPro:IPR011993,InterPro:IPR037848,PANTHER:PTHR31969,PANTHER:PTHR31969:SF32,Pfam:PF02893,SMART:SM00568
chr10_pilon_pilon	maker	exon	1336873	1337059	.	-	.	ID=vitri10g00720-mRNA-1:exon:388;Parent=vitri10g00720-mRNA-1
chr10_pilon_pilon	maker	CDS	1336873	1337059	.	-	1	ID=vitri10g00720-mRNA-1:cds;Parent=vitri10g00720-mRNA-1
chr10_pilon_pilon	maker	exon	1341768	1341969	.	-	.	ID=vitri10g00720-mRNA-1:exon:387;Parent=vitri10g00720-mRNA-1
chr10_pilon_pilon	maker	CDS	1341768	1341969	.	-	2	ID=vitri10g00720-mRNA-1:cds;Parent=vitri10g00720-mRNA-1
chr10_pilon_pilon	maker	exon	1343324	1343472	.	-	.	ID=vitri10g00720-mRNA-1:exon:386;Parent=vitri10g00720-mRNA-1
chr10_pilon_pilon	maker	CDS	1343324	1343472	.	-	1	ID=vitri10g00720-mRNA-1:cds;Parent=vitri10g00720-mRNA-1
chr10_pilon_pilon	maker	exon	1343613	1343800	.	-	.	ID=vitri10g00720-mRNA-1:exon:385;Parent=vitri10g00720-mRNA-1
chr10_pilon_pilon	maker	CDS	1343613	1343800	.	-	0	ID=vitri10g00720-mRNA-1:cds;Parent=vitri10g00720-mRNA-1
chr10_pilon_pilon	maker	CDS	1343890	1344161	.	-	2	ID=vitri10g00720-mRNA-1:cds;Parent=vitri10g00720-mRNA-1
chr10_pilon_pilon	maker	CDS	1344249	1344329	.	-	2	ID=vitri10g00720-mRNA-1:cds;Parent=vitri10g00720-mRNA-1
chr10_pilon_pilon	maker	CDS	1344435	1344693	.	-	0	ID=vitri10g00720-mRNA-1:cds;Parent=vitri10g00720-mRNA-1
chr10_pilon_pilon	maker	five_prime_UTR	1344694	1344731	.	-	.	ID=vitri10g00720-mRNA-1:five_prime_utr;Parent=vitri10g00720-mRNA-1
chr10_pilon_pilon	maker	mRNA	1340593	1344731	.	-	.	ID=vitri10g00720-mRNA-2;Parent=vitri10g00720;Name=vitri10g00720-mRNA-2;_AED=0.27;_eAED=0.27;_QI=38|1|1|1|0.75|0.6|5|139|267;Note=Similar to At5g23370: Putative GEM-like protein 8 (Arabidopsis thaliana OX%3D3702);Dbxref=Gene3D:G3DSA:2.30.29.30,InterPro:IPR004182,InterPro:IPR011993,InterPro:IPR037848,PANTHER:PTHR31969,PANTHER:PTHR31969:SF32,Pfam:PF02893,SMART:SM00568
chr10_pilon_pilon	maker	exon	1340593	1340725	.	-	.	ID=vitri10g00720-mRNA-2:exon:390;Parent=vitri10g00720-mRNA-2
chr10_pilon_pilon	maker	three_prime_UTR	1340593	1340725	.	-	.	ID=vitri10g00720-mRNA-2:three_prime_utr;Parent=vitri10g00720-mRNA-2
chr10_pilon_pilon	maker	three_prime_UTR	1343603	1343608	.	-	.	ID=vitri10g00720-mRNA-2:three_prime_utr;Parent=vitri10g00720-mRNA-2
chr10_pilon_pilon	maker	exon	1343603	1343800	.	-	.	ID=vitri10g00720-mRNA-2:exon:389;Parent=vitri10g00720-mRNA-2
chr10_pilon_pilon	maker	CDS	1343609	1343800	.	-	0	ID=vitri10g00720-mRNA-2:cds;Parent=vitri10g00720-mRNA-2
chr10_pilon_pilon	maker	exon	1343890	1344161	.	-	.	ID=vitri10g00720-mRNA-1:exon:384;Parent=vitri10g00720-mRNA-1,vitri10g00720-mRNA-2
chr10_pilon_pilon	maker	CDS	1343890	1344161	.	-	2	ID=vitri10g00720-mRNA-2:cds;Parent=vitri10g00720-mRNA-2
chr10_pilon_pilon	maker	exon	1344249	1344329	.	-	.	ID=vitri10g00720-mRNA-1:exon:383;Parent=vitri10g00720-mRNA-1,vitri10g00720-mRNA-2
chr10_pilon_pilon	maker	CDS	1344249	1344329	.	-	2	ID=vitri10g00720-mRNA-2:cds;Parent=vitri10g00720-mRNA-2
chr10_pilon_pilon	maker	CDS	1344435	1344693	.	-	0	ID=vitri10g00720-mRNA-2:cds;Parent=vitri10g00720-mRNA-2
chr10_pilon_pilon	maker	exon	1344435	1344731	.	-	.	ID=vitri10g00720-mRNA-1:exon:382;Parent=vitri10g00720-mRNA-1,vitri10g00720-mRNA-2
chr10_pilon_pilon	maker	five_prime_UTR	1344694	1344731	.	-	.	ID=vitri10g00720-mRNA-2:five_prime_utr;Parent=vitri10g00720-mRNA-2
###
chr10_pilon_pilon	maker	gene	1365585	1367943	.	+	.	ID=vitri10g00730;Name=vitri10g00730;Note=Similar to ZFWD4: Zinc finger CCCH domain-containing protein 62 (Arabidopsis thaliana OX%3D3702);Dbxref=Gene3D:G3DSA:2.130.10.10,Gene3D:G3DSA:4.10.1000.10,InterPro:IPR000571,InterPro:IPR001680,InterPro:IPR015943,InterPro:IPR017986,InterPro:IPR019775,InterPro:IPR020472,InterPro:IPR036322,InterPro:IPR036855,MobiDBLite:mobidb-lite,PANTHER:PTHR44050,PANTHER:PTHR44050:SF4,PRINTS:PR00320,Pfam:PF00400,ProSitePatterns:PS00678,ProSiteProfiles:PS50082,ProSiteProfiles:PS50103,ProSiteProfiles:PS50294,SMART:SM00320,SMART:SM00356,SUPERFAMILY:SSF50978,SUPERFAMILY:SSF90229;Ontology_term=GO:0005515,GO:0046872
chr10_pilon_pilon	maker	mRNA	1365585	1367943	.	+	.	ID=vitri10g00730-mRNA-1;Parent=vitri10g00730;Name=vitri10g00730-mRNA-1;_AED=0.15;_eAED=0.15;_QI=0|0.57|0.12|1|1|1|8|0|483;Note=Similar to ZFWD4: Zinc finger CCCH domain-containing protein 62 (Arabidopsis thaliana OX%3D3702);Dbxref=Gene3D:G3DSA:2.130.10.10,Gene3D:G3DSA:4.10.1000.10,InterPro:IPR000571,InterPro:IPR001680,InterPro:IPR015943,InterPro:IPR017986,InterPro:IPR019775,InterPro:IPR020472,InterPro:IPR036322,InterPro:IPR036855,MobiDBLite:mobidb-lite,PANTHER:PTHR44050,PANTHER:PTHR44050:SF4,PRINTS:PR00320,Pfam:PF00400,ProSitePatterns:PS00678,ProSiteProfiles:PS50082,ProSiteProfiles:PS50103,ProSiteProfiles:PS50294,SMART:SM00320,SMART:SM00356,SUPERFAMILY:SSF50978,SUPERFAMILY:SSF90229;Ontology_term=GO:0005515,GO:0046872
chr10_pilon_pilon	maker	exon	1365585	1366175	.	+	.	ID=vitri10g00730-mRNA-1:exon:338;Parent=vitri10g00730-mRNA-1
chr10_pilon_pilon	maker	CDS	1365585	1366175	.	+	0	ID=vitri10g00730-mRNA-1:cds;Parent=vitri10g00730-mRNA-1
chr10_pilon_pilon	maker	exon	1366262	1366447	.	+	.	ID=vitri10g00730-mRNA-1:exon:339;Parent=vitri10g00730-mRNA-1
chr10_pilon_pilon	maker	CDS	1366262	1366447	.	+	0	ID=vitri10g00730-mRNA-1:cds;Parent=vitri10g00730-mRNA-1
chr10_pilon_pilon	maker	exon	1366554	1366655	.	+	.	ID=vitri10g00730-mRNA-1:exon:340;Parent=vitri10g00730-mRNA-1
chr10_pilon_pilon	maker	CDS	1366554	1366655	.	+	0	ID=vitri10g00730-mRNA-1:cds;Parent=vitri10g00730-mRNA-1
chr10_pilon_pilon	maker	exon	1366931	1367077	.	+	.	ID=vitri10g00730-mRNA-1:exon:341;Parent=vitri10g00730-mRNA-1
chr10_pilon_pilon	maker	CDS	1366931	1367077	.	+	0	ID=vitri10g00730-mRNA-1:cds;Parent=vitri10g00730-mRNA-1
chr10_pilon_pilon	maker	exon	1367172	1367291	.	+	.	ID=vitri10g00730-mRNA-1:exon:342;Parent=vitri10g00730-mRNA-1
chr10_pilon_pilon	maker	CDS	1367172	1367291	.	+	0	ID=vitri10g00730-mRNA-1:cds;Parent=vitri10g00730-mRNA-1
chr10_pilon_pilon	maker	exon	1367372	1367431	.	+	.	ID=vitri10g00730-mRNA-1:exon:343;Parent=vitri10g00730-mRNA-1
chr10_pilon_pilon	maker	CDS	1367372	1367431	.	+	0	ID=vitri10g00730-mRNA-1:cds;Parent=vitri10g00730-mRNA-1
chr10_pilon_pilon	maker	exon	1367583	1367680	.	+	.	ID=vitri10g00730-mRNA-1:exon:344;Parent=vitri10g00730-mRNA-1
chr10_pilon_pilon	maker	CDS	1367583	1367680	.	+	0	ID=vitri10g00730-mRNA-1:cds;Parent=vitri10g00730-mRNA-1
chr10_pilon_pilon	maker	exon	1367796	1367943	.	+	.	ID=vitri10g00730-mRNA-1:exon:345;Parent=vitri10g00730-mRNA-1
chr10_pilon_pilon	maker	CDS	1367796	1367943	.	+	1	ID=vitri10g00730-mRNA-1:cds;Parent=vitri10g00730-mRNA-1
###
chr10_pilon_pilon	maker	gene	1370578	1371871	.	-	.	ID=vitri10g00740;Name=vitri10g00740;Note=Protein of unknown function;Dbxref=Gene3D:G3DSA:2.30.29.30,InterPro:IPR004182,InterPro:IPR011993,InterPro:IPR037848,PANTHER:PTHR31969,PANTHER:PTHR31969:SF32,Pfam:PF02893,SMART:SM00568
chr10_pilon_pilon	maker	mRNA	1370578	1371668	.	-	.	ID=vitri10g00740-mRNA-2;Parent=vitri10g00740;Name=vitri10g00740-mRNA-2;_AED=0.25;_eAED=0.25;_QI=26|1|1|1|0.66|0.75|4|145|212;Note=Protein of unknown function;Dbxref=Gene3D:G3DSA:2.30.29.30,InterPro:IPR004182,InterPro:IPR011993,InterPro:IPR037848,PANTHER:PTHR31969,PANTHER:PTHR31969:SF32,Pfam:PF02893,SMART:SM00568
chr10_pilon_pilon	maker	three_prime_UTR	1370578	1370722	.	-	.	ID=vitri10g00740-mRNA-2:three_prime_utr;Parent=vitri10g00740-mRNA-2
chr10_pilon_pilon	maker	CDS	1370723	1370908	.	-	0	ID=vitri10g00740-mRNA-2:cds;Parent=vitri10g00740-mRNA-2
chr10_pilon_pilon	maker	CDS	1371000	1371274	.	-	2	ID=vitri10g00740-mRNA-2:cds;Parent=vitri10g00740-mRNA-2
chr10_pilon_pilon	maker	CDS	1371358	1371438	.	-	2	ID=vitri10g00740-mRNA-2:cds;Parent=vitri10g00740-mRNA-2
chr10_pilon_pilon	maker	CDS	1371546	1371642	.	-	0	ID=vitri10g00740-mRNA-2:cds;Parent=vitri10g00740-mRNA-2
chr10_pilon_pilon	maker	exon	1371546	1371668	.	-	.	ID=vitri10g00740-mRNA-2:exon:381;Parent=vitri10g00740-mRNA-2
chr10_pilon_pilon	maker	five_prime_UTR	1371643	1371668	.	-	.	ID=vitri10g00740-mRNA-2:five_prime_utr;Parent=vitri10g00740-mRNA-2
chr10_pilon_pilon	maker	mRNA	1370578	1371871	.	-	.	ID=vitri10g00740-mRNA-1;Parent=vitri10g00740;Name=vitri10g00740-mRNA-1;_AED=0.20;_eAED=0.20;_QI=198|1|1|1|0.5|0.6|5|145|212;Note=Protein of unknown function;Dbxref=Gene3D:G3DSA:2.30.29.30,InterPro:IPR004182,InterPro:IPR011993,InterPro:IPR037848,PANTHER:PTHR31969,PANTHER:PTHR31969:SF32,Pfam:PF02893,SMART:SM00568
chr10_pilon_pilon	maker	three_prime_UTR	1370578	1370722	.	-	.	ID=vitri10g00740-mRNA-1:three_prime_utr;Parent=vitri10g00740-mRNA-1
chr10_pilon_pilon	maker	exon	1370578	1370908	.	-	.	ID=vitri10g00740-mRNA-1:exon:380;Parent=vitri10g00740-mRNA-2,vitri10g00740-mRNA-1
chr10_pilon_pilon	maker	CDS	1370723	1370908	.	-	0	ID=vitri10g00740-mRNA-1:cds;Parent=vitri10g00740-mRNA-1
chr10_pilon_pilon	maker	exon	1371000	1371274	.	-	.	ID=vitri10g00740-mRNA-1:exon:379;Parent=vitri10g00740-mRNA-2,vitri10g00740-mRNA-1
chr10_pilon_pilon	maker	CDS	1371000	1371274	.	-	2	ID=vitri10g00740-mRNA-1:cds;Parent=vitri10g00740-mRNA-1
chr10_pilon_pilon	maker	exon	1371358	1371438	.	-	.	ID=vitri10g00740-mRNA-1:exon:378;Parent=vitri10g00740-mRNA-2,vitri10g00740-mRNA-1
chr10_pilon_pilon	maker	CDS	1371358	1371438	.	-	2	ID=vitri10g00740-mRNA-1:cds;Parent=vitri10g00740-mRNA-1
chr10_pilon_pilon	maker	CDS	1371546	1371642	.	-	0	ID=vitri10g00740-mRNA-1:cds;Parent=vitri10g00740-mRNA-1
chr10_pilon_pilon	maker	exon	1371546	1371655	.	-	.	ID=vitri10g00740-mRNA-1:exon:377;Parent=vitri10g00740-mRNA-1
chr10_pilon_pilon	maker	five_prime_UTR	1371643	1371655	.	-	.	ID=vitri10g00740-mRNA-1:five_prime_utr;Parent=vitri10g00740-mRNA-1
chr10_pilon_pilon	maker	exon	1371687	1371871	.	-	.	ID=vitri10g00740-mRNA-1:exon:376;Parent=vitri10g00740-mRNA-1
chr10_pilon_pilon	maker	five_prime_UTR	1371687	1371871	.	-	.	ID=vitri10g00740-mRNA-1:five_prime_utr;Parent=vitri10g00740-mRNA-1
###
chr10_pilon_pilon	maker	gene	1379826	1381095	.	+	.	ID=vitri10g00750;Name=vitri10g00750;Note=Protein of unknown function;Dbxref=Gene3D:G3DSA:2.30.29.30,InterPro:IPR004182,InterPro:IPR011993,InterPro:IPR037848,PANTHER:PTHR31969,PANTHER:PTHR31969:SF32,Pfam:PF02893,SMART:SM00568
chr10_pilon_pilon	maker	mRNA	1379826	1381095	.	+	.	ID=vitri10g00750-mRNA-1;Parent=vitri10g00750;Name=vitri10g00750-mRNA-1;_AED=0.14;_eAED=0.14;_QI=207|1|1|1|1|1|4|140|214;Note=Protein of unknown function;Dbxref=Gene3D:G3DSA:2.30.29.30,InterPro:IPR004182,InterPro:IPR011993,InterPro:IPR037848,PANTHER:PTHR31969,PANTHER:PTHR31969:SF32,Pfam:PF02893,SMART:SM00568
chr10_pilon_pilon	maker	five_prime_UTR	1379826	1380032	.	+	.	ID=vitri10g00750-mRNA-1:five_prime_utr;Parent=vitri10g00750-mRNA-1
chr10_pilon_pilon	maker	exon	1379826	1380129	.	+	.	ID=vitri10g00750-mRNA-1:exon:334;Parent=vitri10g00750-mRNA-1
chr10_pilon_pilon	maker	CDS	1380033	1380129	.	+	0	ID=vitri10g00750-mRNA-1:cds;Parent=vitri10g00750-mRNA-1
chr10_pilon_pilon	maker	exon	1380228	1380308	.	+	.	ID=vitri10g00750-mRNA-1:exon:335;Parent=vitri10g00750-mRNA-1
chr10_pilon_pilon	maker	CDS	1380228	1380308	.	+	2	ID=vitri10g00750-mRNA-1:cds;Parent=vitri10g00750-mRNA-1
chr10_pilon_pilon	maker	exon	1380399	1380673	.	+	.	ID=vitri10g00750-mRNA-1:exon:336;Parent=vitri10g00750-mRNA-1
chr10_pilon_pilon	maker	CDS	1380399	1380673	.	+	2	ID=vitri10g00750-mRNA-1:cds;Parent=vitri10g00750-mRNA-1
chr10_pilon_pilon	maker	CDS	1380764	1380955	.	+	0	ID=vitri10g00750-mRNA-1:cds;Parent=vitri10g00750-mRNA-1
chr10_pilon_pilon	maker	exon	1380764	1381095	.	+	.	ID=vitri10g00750-mRNA-1:exon:337;Parent=vitri10g00750-mRNA-1
chr10_pilon_pilon	maker	three_prime_UTR	1380956	1381095	.	+	.	ID=vitri10g00750-mRNA-1:three_prime_utr;Parent=vitri10g00750-mRNA-1
###
chr10_pilon_pilon	maker	gene	1382491	1385284	.	-	.	ID=vitri10g00760;Name=vitri10g00760;Note=Similar to mhkD: Myosin heavy chain kinase D (Dictyostelium discoideum OX%3D44689);Dbxref=Gene3D:G3DSA:2.130.10.10,Gene3D:G3DSA:4.10.1000.10,InterPro:IPR000571,InterPro:IPR001680,InterPro:IPR015943,InterPro:IPR017986,InterPro:IPR019775,InterPro:IPR020472,InterPro:IPR036322,InterPro:IPR036855,MobiDBLite:mobidb-lite,PANTHER:PTHR44050,PANTHER:PTHR44050:SF4,PRINTS:PR00320,Pfam:PF00400,ProSitePatterns:PS00678,ProSiteProfiles:PS50082,ProSiteProfiles:PS50103,ProSiteProfiles:PS50294,SMART:SM00320,SMART:SM00356,SUPERFAMILY:SSF50978,SUPERFAMILY:SSF90229;Ontology_term=GO:0005515,GO:0046872
chr10_pilon_pilon	maker	mRNA	1382491	1385284	.	-	.	ID=vitri10g00760-mRNA-1;Parent=vitri10g00760;Name=vitri10g00760-mRNA-1;_AED=0.12;_eAED=0.12;_QI=24|1|0.62|1|1|1|8|68|468;Note=Similar to mhkD: Myosin heavy chain kinase D (Dictyostelium discoideum OX%3D44689);Dbxref=Gene3D:G3DSA:2.130.10.10,Gene3D:G3DSA:4.10.1000.10,InterPro:IPR000571,InterPro:IPR001680,InterPro:IPR015943,InterPro:IPR017986,InterPro:IPR019775,InterPro:IPR020472,InterPro:IPR036322,InterPro:IPR036855,MobiDBLite:mobidb-lite,PANTHER:PTHR44050,PANTHER:PTHR44050:SF4,PRINTS:PR00320,Pfam:PF00400,ProSitePatterns:PS00678,ProSiteProfiles:PS50082,ProSiteProfiles:PS50103,ProSiteProfiles:PS50294,SMART:SM00320,SMART:SM00356,SUPERFAMILY:SSF50978,SUPERFAMILY:SSF90229;Ontology_term=GO:0005515,GO:0046872
chr10_pilon_pilon	maker	three_prime_UTR	1382491	1382558	.	-	.	ID=vitri10g00760-mRNA-1:three_prime_utr;Parent=vitri10g00760-mRNA-1
chr10_pilon_pilon	maker	exon	1382491	1382703	.	-	.	ID=vitri10g00760-mRNA-1:exon:368;Parent=vitri10g00760-mRNA-1
chr10_pilon_pilon	maker	CDS	1382559	1382703	.	-	1	ID=vitri10g00760-mRNA-1:cds;Parent=vitri10g00760-mRNA-1
chr10_pilon_pilon	maker	exon	1382801	1382898	.	-	.	ID=vitri10g00760-mRNA-1:exon:367;Parent=vitri10g00760-mRNA-1
chr10_pilon_pilon	maker	CDS	1382801	1382898	.	-	0	ID=vitri10g00760-mRNA-1:cds;Parent=vitri10g00760-mRNA-1
chr10_pilon_pilon	maker	exon	1383049	1383108	.	-	.	ID=vitri10g00760-mRNA-1:exon:366;Parent=vitri10g00760-mRNA-1
chr10_pilon_pilon	maker	CDS	1383049	1383108	.	-	0	ID=vitri10g00760-mRNA-1:cds;Parent=vitri10g00760-mRNA-1
chr10_pilon_pilon	maker	exon	1383192	1383311	.	-	.	ID=vitri10g00760-mRNA-1:exon:365;Parent=vitri10g00760-mRNA-1
chr10_pilon_pilon	maker	CDS	1383192	1383311	.	-	0	ID=vitri10g00760-mRNA-1:cds;Parent=vitri10g00760-mRNA-1
chr10_pilon_pilon	maker	exon	1383826	1383972	.	-	.	ID=vitri10g00760-mRNA-1:exon:364;Parent=vitri10g00760-mRNA-1
chr10_pilon_pilon	maker	CDS	1383826	1383972	.	-	0	ID=vitri10g00760-mRNA-1:cds;Parent=vitri10g00760-mRNA-1
chr10_pilon_pilon	maker	exon	1384232	1384333	.	-	.	ID=vitri10g00760-mRNA-1:exon:363;Parent=vitri10g00760-mRNA-1
chr10_pilon_pilon	maker	CDS	1384232	1384333	.	-	0	ID=vitri10g00760-mRNA-1:cds;Parent=vitri10g00760-mRNA-1
chr10_pilon_pilon	maker	exon	1384440	1384625	.	-	.	ID=vitri10g00760-mRNA-1:exon:362;Parent=vitri10g00760-mRNA-1
chr10_pilon_pilon	maker	CDS	1384440	1384625	.	-	0	ID=vitri10g00760-mRNA-1:cds;Parent=vitri10g00760-mRNA-1
chr10_pilon_pilon	maker	CDS	1384712	1385260	.	-	0	ID=vitri10g00760-mRNA-1:cds;Parent=vitri10g00760-mRNA-1
chr10_pilon_pilon	maker	exon	1384712	1385284	.	-	.	ID=vitri10g00760-mRNA-1:exon:361;Parent=vitri10g00760-mRNA-1
chr10_pilon_pilon	maker	five_prime_UTR	1385261	1385284	.	-	.	ID=vitri10g00760-mRNA-1:five_prime_utr;Parent=vitri10g00760-mRNA-1
###
chr10_pilon_pilon	maker	gene	1404410	1408281	.	-	.	ID=vitri10g00770;Name=vitri10g00770;Note=Similar to MED33B: Mediator of RNA polymerase II transcription subunit 33B (Arabidopsis thaliana OX%3D3702);Dbxref=Gene3D:G3DSA:3.30.390.10,InterPro:IPR006598,InterPro:IPR020811,InterPro:IPR022212,InterPro:IPR029017,PANTHER:PTHR33739,PANTHER:PTHR33739:SF7,Pfam:PF03952,Pfam:PF05686,Pfam:PF12552,SUPERFAMILY:SSF54826
chr10_pilon_pilon	maker	mRNA	1404410	1408281	.	-	.	ID=vitri10g00770-mRNA-1;Parent=vitri10g00770;Name=vitri10g00770-mRNA-1;_AED=0.40;_eAED=0.40;_QI=0|0|0|0.12|1|1|8|0|576;Note=Similar to MED33B: Mediator of RNA polymerase II transcription subunit 33B (Arabidopsis thaliana OX%3D3702);Dbxref=Gene3D:G3DSA:3.30.390.10,InterPro:IPR006598,InterPro:IPR020811,InterPro:IPR022212,InterPro:IPR029017,PANTHER:PTHR33739,PANTHER:PTHR33739:SF7,Pfam:PF03952,Pfam:PF05686,Pfam:PF12552,SUPERFAMILY:SSF54826
chr10_pilon_pilon	maker	exon	1404410	1404793	.	-	.	ID=vitri10g00770-mRNA-1:exon:304;Parent=vitri10g00770-mRNA-1
chr10_pilon_pilon	maker	CDS	1404410	1404793	.	-	0	ID=vitri10g00770-mRNA-1:cds;Parent=vitri10g00770-mRNA-1
chr10_pilon_pilon	maker	exon	1404955	1405167	.	-	.	ID=vitri10g00770-mRNA-1:exon:305;Parent=vitri10g00770-mRNA-1
chr10_pilon_pilon	maker	CDS	1404955	1405167	.	-	0	ID=vitri10g00770-mRNA-1:cds;Parent=vitri10g00770-mRNA-1
chr10_pilon_pilon	maker	exon	1405411	1405714	.	-	.	ID=vitri10g00770-mRNA-1:exon:306;Parent=vitri10g00770-mRNA-1
chr10_pilon_pilon	maker	CDS	1405411	1405714	.	-	1	ID=vitri10g00770-mRNA-1:cds;Parent=vitri10g00770-mRNA-1
chr10_pilon_pilon	maker	exon	1405769	1405905	.	-	.	ID=vitri10g00770-mRNA-1:exon:307;Parent=vitri10g00770-mRNA-1
chr10_pilon_pilon	maker	CDS	1405769	1405905	.	-	0	ID=vitri10g00770-mRNA-1:cds;Parent=vitri10g00770-mRNA-1
chr10_pilon_pilon	maker	exon	1406201	1406394	.	-	.	ID=vitri10g00770-mRNA-1:exon:308;Parent=vitri10g00770-mRNA-1
chr10_pilon_pilon	maker	CDS	1406201	1406394	.	-	2	ID=vitri10g00770-mRNA-1:cds;Parent=vitri10g00770-mRNA-1
chr10_pilon_pilon	maker	exon	1406925	1407136	.	-	.	ID=vitri10g00770-mRNA-1:exon:309;Parent=vitri10g00770-mRNA-1
chr10_pilon_pilon	maker	CDS	1406925	1407136	.	-	1	ID=vitri10g00770-mRNA-1:cds;Parent=vitri10g00770-mRNA-1
chr10_pilon_pilon	maker	exon	1407240	1407434	.	-	.	ID=vitri10g00770-mRNA-1:exon:310;Parent=vitri10g00770-mRNA-1
chr10_pilon_pilon	maker	CDS	1407240	1407434	.	-	1	ID=vitri10g00770-mRNA-1:cds;Parent=vitri10g00770-mRNA-1
chr10_pilon_pilon	maker	exon	1408190	1408281	.	-	.	ID=vitri10g00770-mRNA-1:exon:311;Parent=vitri10g00770-mRNA-1
chr10_pilon_pilon	maker	CDS	1408190	1408281	.	-	0	ID=vitri10g00770-mRNA-1:cds;Parent=vitri10g00770-mRNA-1
###
chr10_pilon_pilon	maker	gene	1410660	1423958	.	+	.	ID=vitri10g00780;Name=vitri10g00780;Note=Protein of unknown function;Dbxref=Gene3D:G3DSA:2.30.29.30,InterPro:IPR004182,InterPro:IPR011993,InterPro:IPR037848,PANTHER:PTHR31969,PANTHER:PTHR31969:SF32,Pfam:PF02893,SMART:SM00568
chr10_pilon_pilon	maker	mRNA	1410660	1423958	.	+	.	ID=vitri10g00780-mRNA-1;Parent=vitri10g00780;Name=vitri10g00780-mRNA-1;_AED=0.36;_eAED=0.39;_QI=0|0.5|0.18|0.81|0.3|0.36|11|0|546;Note=Protein of unknown function;Dbxref=Gene3D:G3DSA:2.30.29.30,InterPro:IPR004182,InterPro:IPR011993,InterPro:IPR037848,PANTHER:PTHR31969,PANTHER:PTHR31969:SF32,Pfam:PF02893,SMART:SM00568
chr10_pilon_pilon	maker	CDS	1410660	1410707	.	+	0	ID=vitri10g00780-mRNA-1:cds;Parent=vitri10g00780-mRNA-1
chr10_pilon_pilon	maker	CDS	1411373	1411664	.	+	0	ID=vitri10g00780-mRNA-1:cds;Parent=vitri10g00780-mRNA-1
chr10_pilon_pilon	maker	CDS	1411770	1411850	.	+	2	ID=vitri10g00780-mRNA-1:cds;Parent=vitri10g00780-mRNA-1
chr10_pilon_pilon	maker	CDS	1411938	1412212	.	+	2	ID=vitri10g00780-mRNA-1:cds;Parent=vitri10g00780-mRNA-1
chr10_pilon_pilon	maker	CDS	1412302	1412489	.	+	0	ID=vitri10g00780-mRNA-1:cds;Parent=vitri10g00780-mRNA-1
chr10_pilon_pilon	maker	CDS	1415468	1415528	.	+	1	ID=vitri10g00780-mRNA-1:cds;Parent=vitri10g00780-mRNA-1
chr10_pilon_pilon	maker	CDS	1415537	1415810	.	+	0	ID=vitri10g00780-mRNA-1:cds;Parent=vitri10g00780-mRNA-1
chr10_pilon_pilon	maker	CDS	1416009	1416084	.	+	2	ID=vitri10g00780-mRNA-1:cds;Parent=vitri10g00780-mRNA-1
chr10_pilon_pilon	maker	CDS	1416102	1416294	.	+	1	ID=vitri10g00780-mRNA-1:cds;Parent=vitri10g00780-mRNA-1
chr10_pilon_pilon	maker	CDS	1416371	1416410	.	+	0	ID=vitri10g00780-mRNA-1:cds;Parent=vitri10g00780-mRNA-1
chr10_pilon_pilon	maker	CDS	1423846	1423958	.	+	2	ID=vitri10g00780-mRNA-1:cds;Parent=vitri10g00780-mRNA-1
chr10_pilon_pilon	maker	mRNA	1410660	1423958	.	+	.	ID=vitri10g00780-mRNA-2;Parent=vitri10g00780;Name=vitri10g00780-mRNA-2;_AED=0.37;_eAED=0.37;_QI=0|0.55|0.2|0.8|0.33|0.5|10|0|523;Note=Protein of unknown function;Dbxref=Gene3D:G3DSA:2.30.29.30,InterPro:IPR004182,InterPro:IPR011993,InterPro:IPR037848,PANTHER:PTHR31969,PANTHER:PTHR31969:SF32,Pfam:PF02893,SMART:SM00568
chr10_pilon_pilon	maker	CDS	1410660	1410707	.	+	0	ID=vitri10g00780-mRNA-2:cds;Parent=vitri10g00780-mRNA-2
chr10_pilon_pilon	maker	CDS	1411373	1411664	.	+	0	ID=vitri10g00780-mRNA-2:cds;Parent=vitri10g00780-mRNA-2
chr10_pilon_pilon	maker	CDS	1411770	1411850	.	+	2	ID=vitri10g00780-mRNA-2:cds;Parent=vitri10g00780-mRNA-2
chr10_pilon_pilon	maker	CDS	1411938	1412212	.	+	2	ID=vitri10g00780-mRNA-2:cds;Parent=vitri10g00780-mRNA-2
chr10_pilon_pilon	maker	exon	1412302	1412481	.	+	.	ID=vitri10g00780-mRNA-2:exon:262;Parent=vitri10g00780-mRNA-2
chr10_pilon_pilon	maker	CDS	1412302	1412481	.	+	0	ID=vitri10g00780-mRNA-2:cds;Parent=vitri10g00780-mRNA-2
chr10_pilon_pilon	maker	exon	1415537	1415810	.	+	.	ID=vitri10g00780-mRNA-1:exon:257;Parent=vitri10g00780-mRNA-1,vitri10g00780-mRNA-2
chr10_pilon_pilon	maker	CDS	1415537	1415810	.	+	0	ID=vitri10g00780-mRNA-2:cds;Parent=vitri10g00780-mRNA-2
chr10_pilon_pilon	maker	exon	1416009	1416084	.	+	.	ID=vitri10g00780-mRNA-1:exon:258;Parent=vitri10g00780-mRNA-1,vitri10g00780-mRNA-2
chr10_pilon_pilon	maker	CDS	1416009	1416084	.	+	2	ID=vitri10g00780-mRNA-2:cds;Parent=vitri10g00780-mRNA-2
chr10_pilon_pilon	maker	exon	1416102	1416294	.	+	.	ID=vitri10g00780-mRNA-1:exon:259;Parent=vitri10g00780-mRNA-1,vitri10g00780-mRNA-2
chr10_pilon_pilon	maker	CDS	1416102	1416294	.	+	1	ID=vitri10g00780-mRNA-2:cds;Parent=vitri10g00780-mRNA-2
chr10_pilon_pilon	maker	CDS	1416371	1416410	.	+	0	ID=vitri10g00780-mRNA-2:cds;Parent=vitri10g00780-mRNA-2
chr10_pilon_pilon	maker	CDS	1423846	1423958	.	+	2	ID=vitri10g00780-mRNA-2:cds;Parent=vitri10g00780-mRNA-2
chr10_pilon_pilon	maker	mRNA	1410660	1423958	.	+	.	ID=vitri10g00780-mRNA-3;Parent=vitri10g00780;Name=vitri10g00780-mRNA-3;_AED=0.39;_eAED=0.39;_QI=0|0.44|0.2|0.8|0.33|0.4|10|0|479;Note=Protein of unknown function;Dbxref=Gene3D:G3DSA:2.30.29.30,InterPro:IPR004182,InterPro:IPR011993,InterPro:IPR037848,PANTHER:PTHR31969,PANTHER:PTHR31969:SF32,Pfam:PF02893,SMART:SM00568
chr10_pilon_pilon	maker	exon	1410660	1410707	.	+	.	ID=vitri10g00780-mRNA-1:exon:251;Parent=vitri10g00780-mRNA-1,vitri10g00780-mRNA-2,vitri10g00780-mRNA-3
chr10_pilon_pilon	maker	CDS	1410660	1410707	.	+	0	ID=vitri10g00780-mRNA-3:cds;Parent=vitri10g00780-mRNA-3
chr10_pilon_pilon	maker	exon	1411373	1411664	.	+	.	ID=vitri10g00780-mRNA-1:exon:252;Parent=vitri10g00780-mRNA-1,vitri10g00780-mRNA-2,vitri10g00780-mRNA-3
chr10_pilon_pilon	maker	CDS	1411373	1411664	.	+	0	ID=vitri10g00780-mRNA-3:cds;Parent=vitri10g00780-mRNA-3
chr10_pilon_pilon	maker	exon	1411770	1411850	.	+	.	ID=vitri10g00780-mRNA-1:exon:253;Parent=vitri10g00780-mRNA-1,vitri10g00780-mRNA-2,vitri10g00780-mRNA-3
chr10_pilon_pilon	maker	CDS	1411770	1411850	.	+	2	ID=vitri10g00780-mRNA-3:cds;Parent=vitri10g00780-mRNA-3
chr10_pilon_pilon	maker	exon	1411938	1412212	.	+	.	ID=vitri10g00780-mRNA-1:exon:254;Parent=vitri10g00780-mRNA-1,vitri10g00780-mRNA-2,vitri10g00780-mRNA-3
chr10_pilon_pilon	maker	CDS	1411938	1412212	.	+	2	ID=vitri10g00780-mRNA-3:cds;Parent=vitri10g00780-mRNA-3
chr10_pilon_pilon	maker	exon	1412302	1412489	.	+	.	ID=vitri10g00780-mRNA-1:exon:255;Parent=vitri10g00780-mRNA-1,vitri10g00780-mRNA-3
chr10_pilon_pilon	maker	CDS	1412302	1412489	.	+	0	ID=vitri10g00780-mRNA-3:cds;Parent=vitri10g00780-mRNA-3
chr10_pilon_pilon	maker	exon	1415468	1415528	.	+	.	ID=vitri10g00780-mRNA-1:exon:256;Parent=vitri10g00780-mRNA-1,vitri10g00780-mRNA-3
chr10_pilon_pilon	maker	CDS	1415468	1415528	.	+	1	ID=vitri10g00780-mRNA-3:cds;Parent=vitri10g00780-mRNA-3
chr10_pilon_pilon	maker	exon	1415537	1415627	.	+	.	ID=vitri10g00780-mRNA-3:exon:263;Parent=vitri10g00780-mRNA-3
chr10_pilon_pilon	maker	CDS	1415537	1415627	.	+	0	ID=vitri10g00780-mRNA-3:cds;Parent=vitri10g00780-mRNA-3
chr10_pilon_pilon	maker	exon	1416044	1416294	.	+	.	ID=vitri10g00780-mRNA-3:exon:264;Parent=vitri10g00780-mRNA-3
chr10_pilon_pilon	maker	CDS	1416044	1416294	.	+	2	ID=vitri10g00780-mRNA-3:cds;Parent=vitri10g00780-mRNA-3
chr10_pilon_pilon	maker	exon	1416371	1416410	.	+	.	ID=vitri10g00780-mRNA-1:exon:260;Parent=vitri10g00780-mRNA-1,vitri10g00780-mRNA-2,vitri10g00780-mRNA-3
chr10_pilon_pilon	maker	CDS	1416371	1416410	.	+	0	ID=vitri10g00780-mRNA-3:cds;Parent=vitri10g00780-mRNA-3
chr10_pilon_pilon	maker	exon	1423846	1423958	.	+	.	ID=vitri10g00780-mRNA-1:exon:261;Parent=vitri10g00780-mRNA-1,vitri10g00780-mRNA-2,vitri10g00780-mRNA-3
chr10_pilon_pilon	maker	CDS	1423846	1423958	.	+	2	ID=vitri10g00780-mRNA-3:cds;Parent=vitri10g00780-mRNA-3
###
chr10_pilon_pilon	maker	gene	1410757	1424140	.	-	.	ID=vitri10g00790;Name=vitri10g00790;Note=Similar to ZFWD1: Zinc finger CCCH domain-containing protein 48 (Arabidopsis thaliana OX%3D3702);Dbxref=Gene3D:G3DSA:2.130.10.10,Gene3D:G3DSA:4.10.1000.10,InterPro:IPR000571,InterPro:IPR001680,InterPro:IPR015943,InterPro:IPR017986,InterPro:IPR019775,InterPro:IPR036322,InterPro:IPR036855,MobiDBLite:mobidb-lite,PANTHER:PTHR44050,PANTHER:PTHR44050:SF4,Pfam:PF00400,ProSitePatterns:PS00678,ProSiteProfiles:PS50082,ProSiteProfiles:PS50103,ProSiteProfiles:PS50294,SMART:SM00320,SMART:SM00356,SUPERFAMILY:SSF50978,SUPERFAMILY:SSF90229;Ontology_term=GO:0005515,GO:0046872
chr10_pilon_pilon	maker	mRNA	1421755	1424140	.	-	.	ID=vitri10g00790-mRNA-1;Parent=vitri10g00790;Name=vitri10g00790-mRNA-1;_AED=0.15;_eAED=0.15;_QI=18|0.83|0.71|1|1|0.85|7|63|429;Note=Similar to ZFWD1: Zinc finger CCCH domain-containing protein 48 (Arabidopsis thaliana OX%3D3702);Dbxref=Gene3D:G3DSA:2.130.10.10,Gene3D:G3DSA:4.10.1000.10,InterPro:IPR000571,InterPro:IPR001680,InterPro:IPR015943,InterPro:IPR017986,InterPro:IPR019775,InterPro:IPR036322,InterPro:IPR036855,MobiDBLite:mobidb-lite,PANTHER:PTHR44050,PANTHER:PTHR44050:SF4,Pfam:PF00400,ProSitePatterns:PS00678,ProSiteProfiles:PS50082,ProSiteProfiles:PS50103,ProSiteProfiles:PS50294,SMART:SM00320,SMART:SM00356,SUPERFAMILY:SSF50978,SUPERFAMILY:SSF90229;Ontology_term=GO:0005515,GO:0046872
chr10_pilon_pilon	maker	three_prime_UTR	1421755	1421817	.	-	.	ID=vitri10g00790-mRNA-1:three_prime_utr;Parent=vitri10g00790-mRNA-1
chr10_pilon_pilon	maker	exon	1421755	1421965	.	-	.	ID=vitri10g00790-mRNA-1:exon:300;Parent=vitri10g00790-mRNA-1
chr10_pilon_pilon	maker	CDS	1421818	1421965	.	-	1	ID=vitri10g00790-mRNA-1:cds;Parent=vitri10g00790-mRNA-1
chr10_pilon_pilon	maker	exon	1422081	1422178	.	-	.	ID=vitri10g00790-mRNA-1:exon:299;Parent=vitri10g00790-mRNA-1
chr10_pilon_pilon	maker	CDS	1422081	1422178	.	-	0	ID=vitri10g00790-mRNA-1:cds;Parent=vitri10g00790-mRNA-1
chr10_pilon_pilon	maker	exon	1422330	1422389	.	-	.	ID=vitri10g00790-mRNA-1:exon:298;Parent=vitri10g00790-mRNA-1
chr10_pilon_pilon	maker	CDS	1422330	1422389	.	-	0	ID=vitri10g00790-mRNA-1:cds;Parent=vitri10g00790-mRNA-1
chr10_pilon_pilon	maker	exon	1422684	1422830	.	-	.	ID=vitri10g00790-mRNA-1:exon:297;Parent=vitri10g00790-mRNA-1
chr10_pilon_pilon	maker	CDS	1422684	1422830	.	-	0	ID=vitri10g00790-mRNA-1:cds;Parent=vitri10g00790-mRNA-1
chr10_pilon_pilon	maker	exon	1423094	1423195	.	-	.	ID=vitri10g00790-mRNA-1:exon:296;Parent=vitri10g00790-mRNA-1
chr10_pilon_pilon	maker	CDS	1423094	1423195	.	-	0	ID=vitri10g00790-mRNA-1:cds;Parent=vitri10g00790-mRNA-1
chr10_pilon_pilon	maker	exon	1423302	1423487	.	-	.	ID=vitri10g00790-mRNA-1:exon:295;Parent=vitri10g00790-mRNA-1
chr10_pilon_pilon	maker	CDS	1423302	1423487	.	-	0	ID=vitri10g00790-mRNA-1:cds;Parent=vitri10g00790-mRNA-1
chr10_pilon_pilon	maker	CDS	1423574	1424122	.	-	0	ID=vitri10g00790-mRNA-1:cds;Parent=vitri10g00790-mRNA-1
chr10_pilon_pilon	maker	exon	1423574	1424140	.	-	.	ID=vitri10g00790-mRNA-1:exon:294;Parent=vitri10g00790-mRNA-1
chr10_pilon_pilon	maker	five_prime_UTR	1424123	1424140	.	-	.	ID=vitri10g00790-mRNA-1:five_prime_utr;Parent=vitri10g00790-mRNA-1
###
chr10_pilon_pilon	maker	gene	1426174	1426415	.	+	.	ID=vitri10g00800;Name=vitri10g00800;Note=Protein of unknown function
chr10_pilon_pilon	maker	mRNA	1426174	1426415	.	+	.	ID=vitri10g00800-mRNA-1;Parent=vitri10g00800;Name=vitri10g00800-mRNA-1;_AED=0.48;_eAED=1.00;_QI=0|0|0|1|0|0|2|0|62;Note=Protein of unknown function
chr10_pilon_pilon	maker	exon	1426174	1426195	.	+	.	ID=vitri10g00800-mRNA-1:exon:312;Parent=vitri10g00800-mRNA-1
chr10_pilon_pilon	maker	CDS	1426174	1426195	.	+	0	ID=vitri10g00800-mRNA-1:cds;Parent=vitri10g00800-mRNA-1
chr10_pilon_pilon	maker	exon	1426249	1426415	.	+	.	ID=vitri10g00800-mRNA-1:exon:313;Parent=vitri10g00800-mRNA-1
chr10_pilon_pilon	maker	CDS	1426249	1426415	.	+	2	ID=vitri10g00800-mRNA-1:cds;Parent=vitri10g00800-mRNA-1
###
chr10_pilon_pilon	maker	gene	1426579	1429827	.	+	.	ID=vitri10g00810;Name=vitri10g00810;Note=Protein of unknown function;Dbxref=InterPro:IPR004182,InterPro:IPR037848,PANTHER:PTHR31969,PANTHER:PTHR31969:SF32,Pfam:PF02893
chr10_pilon_pilon	maker	mRNA	1426579	1429827	.	+	.	ID=vitri10g00810-mRNA-1;Parent=vitri10g00810;Name=vitri10g00810-mRNA-1;_AED=0.45;_eAED=0.45;_QI=0|0|0|1|0.5|0.66|3|0|131;Note=Protein of unknown function;Dbxref=InterPro:IPR004182,InterPro:IPR037848,PANTHER:PTHR31969,PANTHER:PTHR31969:SF32,Pfam:PF02893
chr10_pilon_pilon	maker	exon	1426579	1426654	.	+	.	ID=vitri10g00810-mRNA-1:exon:269;Parent=vitri10g00810-mRNA-1
chr10_pilon_pilon	maker	CDS	1426579	1426654	.	+	0	ID=vitri10g00810-mRNA-1:cds;Parent=vitri10g00810-mRNA-1
chr10_pilon_pilon	maker	exon	1426749	1426960	.	+	.	ID=vitri10g00810-mRNA-1:exon:270;Parent=vitri10g00810-mRNA-1
chr10_pilon_pilon	maker	CDS	1426749	1426960	.	+	2	ID=vitri10g00810-mRNA-1:cds;Parent=vitri10g00810-mRNA-1
chr10_pilon_pilon	maker	exon	1429720	1429827	.	+	.	ID=vitri10g00810-mRNA-1:exon:271;Parent=vitri10g00810-mRNA-1
chr10_pilon_pilon	maker	CDS	1429720	1429827	.	+	0	ID=vitri10g00810-mRNA-1:cds;Parent=vitri10g00810-mRNA-1
###
chr10_pilon_pilon	maker	gene	1441572	1452315	.	+	.	ID=vitri10g00820;Name=vitri10g00820;Note=Protein of unknown function;Dbxref=InterPro:IPR004182,InterPro:IPR037848,PANTHER:PTHR31969,PANTHER:PTHR31969:SF33,Pfam:PF02893
chr10_pilon_pilon	maker	mRNA	1441572	1452315	.	+	.	ID=vitri10g00820-mRNA-1;Parent=vitri10g00820;Name=vitri10g00820-mRNA-1;_AED=0.36;_eAED=0.46;_QI=248|0.12|0.11|1|0|0.11|9|0|322;Note=Protein of unknown function;Dbxref=InterPro:IPR004182,InterPro:IPR037848,PANTHER:PTHR31969,PANTHER:PTHR31969:SF33,Pfam:PF02893
chr10_pilon_pilon	maker	five_prime_UTR	1441572	1441819	.	+	.	ID=vitri10g00820-mRNA-1:five_prime_utr;Parent=vitri10g00820-mRNA-1
chr10_pilon_pilon	maker	exon	1441572	1441886	.	+	.	ID=vitri10g00820-mRNA-1:exon:272;Parent=vitri10g00820-mRNA-1
chr10_pilon_pilon	maker	CDS	1441820	1441886	.	+	0	ID=vitri10g00820-mRNA-1:cds;Parent=vitri10g00820-mRNA-1
chr10_pilon_pilon	maker	exon	1442115	1442341	.	+	.	ID=vitri10g00820-mRNA-1:exon:273;Parent=vitri10g00820-mRNA-1
chr10_pilon_pilon	maker	CDS	1442115	1442341	.	+	2	ID=vitri10g00820-mRNA-1:cds;Parent=vitri10g00820-mRNA-1
chr10_pilon_pilon	maker	exon	1442457	1442626	.	+	.	ID=vitri10g00820-mRNA-1:exon:274;Parent=vitri10g00820-mRNA-1
chr10_pilon_pilon	maker	CDS	1442457	1442626	.	+	0	ID=vitri10g00820-mRNA-1:cds;Parent=vitri10g00820-mRNA-1
chr10_pilon_pilon	maker	exon	1450200	1450251	.	+	.	ID=vitri10g00820-mRNA-1:exon:275;Parent=vitri10g00820-mRNA-1
chr10_pilon_pilon	maker	CDS	1450200	1450251	.	+	1	ID=vitri10g00820-mRNA-1:cds;Parent=vitri10g00820-mRNA-1
chr10_pilon_pilon	maker	exon	1450394	1450451	.	+	.	ID=vitri10g00820-mRNA-1:exon:276;Parent=vitri10g00820-mRNA-1
chr10_pilon_pilon	maker	CDS	1450394	1450451	.	+	0	ID=vitri10g00820-mRNA-1:cds;Parent=vitri10g00820-mRNA-1
chr10_pilon_pilon	maker	exon	1450474	1450607	.	+	.	ID=vitri10g00820-mRNA-1:exon:277;Parent=vitri10g00820-mRNA-1
chr10_pilon_pilon	maker	CDS	1450474	1450607	.	+	2	ID=vitri10g00820-mRNA-1:cds;Parent=vitri10g00820-mRNA-1
chr10_pilon_pilon	maker	exon	1450641	1450680	.	+	.	ID=vitri10g00820-mRNA-1:exon:278;Parent=vitri10g00820-mRNA-1
chr10_pilon_pilon	maker	CDS	1450641	1450680	.	+	0	ID=vitri10g00820-mRNA-1:cds;Parent=vitri10g00820-mRNA-1
chr10_pilon_pilon	maker	exon	1450758	1450911	.	+	.	ID=vitri10g00820-mRNA-1:exon:279;Parent=vitri10g00820-mRNA-1
chr10_pilon_pilon	maker	CDS	1450758	1450911	.	+	2	ID=vitri10g00820-mRNA-1:cds;Parent=vitri10g00820-mRNA-1
chr10_pilon_pilon	maker	exon	1452249	1452315	.	+	.	ID=vitri10g00820-mRNA-1:exon:280;Parent=vitri10g00820-mRNA-1
chr10_pilon_pilon	maker	CDS	1452249	1452315	.	+	1	ID=vitri10g00820-mRNA-1:cds;Parent=vitri10g00820-mRNA-1
###
chr10_pilon_pilon	maker	gene	1452330	1453371	.	+	.	ID=vitri10g00830;Name=vitri10g00830;Note=Protein of unknown function;Dbxref=Gene3D:G3DSA:2.30.29.30,InterPro:IPR004182,InterPro:IPR011993,InterPro:IPR037848,MobiDBLite:mobidb-lite,PANTHER:PTHR31969,PANTHER:PTHR31969:SF32,Pfam:PF02893,SMART:SM00568
chr10_pilon_pilon	maker	mRNA	1452330	1453371	.	+	.	ID=vitri10g00830-mRNA-1;Parent=vitri10g00830;Name=vitri10g00830-mRNA-1;_AED=0.42;_eAED=0.42;_QI=0|0.66|0.5|1|1|1|4|115|205;Note=Protein of unknown function;Dbxref=Gene3D:G3DSA:2.30.29.30,InterPro:IPR004182,InterPro:IPR011993,InterPro:IPR037848,MobiDBLite:mobidb-lite,PANTHER:PTHR31969,PANTHER:PTHR31969:SF32,Pfam:PF02893,SMART:SM00568
chr10_pilon_pilon	maker	exon	1452330	1452426	.	+	.	ID=vitri10g00830-mRNA-1:exon:265;Parent=vitri10g00830-mRNA-1
chr10_pilon_pilon	maker	CDS	1452330	1452426	.	+	0	ID=vitri10g00830-mRNA-1:cds;Parent=vitri10g00830-mRNA-1
chr10_pilon_pilon	maker	exon	1452529	1452609	.	+	.	ID=vitri10g00830-mRNA-1:exon:266;Parent=vitri10g00830-mRNA-1
chr10_pilon_pilon	maker	CDS	1452529	1452609	.	+	2	ID=vitri10g00830-mRNA-1:cds;Parent=vitri10g00830-mRNA-1
chr10_pilon_pilon	maker	exon	1452720	1452991	.	+	.	ID=vitri10g00830-mRNA-1:exon:267;Parent=vitri10g00830-mRNA-1
chr10_pilon_pilon	maker	CDS	1452720	1452991	.	+	2	ID=vitri10g00830-mRNA-1:cds;Parent=vitri10g00830-mRNA-1
chr10_pilon_pilon	maker	CDS	1453089	1453256	.	+	0	ID=vitri10g00830-mRNA-1:cds;Parent=vitri10g00830-mRNA-1
chr10_pilon_pilon	maker	exon	1453089	1453371	.	+	.	ID=vitri10g00830-mRNA-1:exon:268;Parent=vitri10g00830-mRNA-1
chr10_pilon_pilon	maker	three_prime_UTR	1453257	1453371	.	+	.	ID=vitri10g00830-mRNA-1:three_prime_utr;Parent=vitri10g00830-mRNA-1
###
chr10_pilon_pilon	maker	gene	1455843	1457295	.	+	.	ID=vitri10g00840;Name=vitri10g00840;Note=Similar to At5g08350: GEM-like protein 4 (Arabidopsis thaliana OX%3D3702);Dbxref=CDD:cd13222,Gene3D:G3DSA:2.30.29.30,InterPro:IPR004182,InterPro:IPR011993,InterPro:IPR037848,MobiDBLite:mobidb-lite,PANTHER:PTHR31969,PANTHER:PTHR31969:SF32,Pfam:PF02893,SMART:SM00568
chr10_pilon_pilon	maker	mRNA	1455843	1457295	.	+	.	ID=vitri10g00840-mRNA-1;Parent=vitri10g00840;Name=vitri10g00840-mRNA-1;_AED=0.37;_eAED=0.37;_QI=329|1|1|1|1|1|4|158|218;Note=Similar to At5g08350: GEM-like protein 4 (Arabidopsis thaliana OX%3D3702);Dbxref=CDD:cd13222,Gene3D:G3DSA:2.30.29.30,InterPro:IPR004182,InterPro:IPR011993,InterPro:IPR037848,MobiDBLite:mobidb-lite,PANTHER:PTHR31969,PANTHER:PTHR31969:SF32,Pfam:PF02893,SMART:SM00568
chr10_pilon_pilon	maker	five_prime_UTR	1455843	1456171	.	+	.	ID=vitri10g00840-mRNA-1:five_prime_utr;Parent=vitri10g00840-mRNA-1
chr10_pilon_pilon	maker	exon	1455843	1456298	.	+	.	ID=vitri10g00840-mRNA-1:exon:247;Parent=vitri10g00840-mRNA-1
chr10_pilon_pilon	maker	CDS	1456172	1456298	.	+	0	ID=vitri10g00840-mRNA-1:cds;Parent=vitri10g00840-mRNA-1
chr10_pilon_pilon	maker	exon	1456392	1456472	.	+	.	ID=vitri10g00840-mRNA-1:exon:248;Parent=vitri10g00840-mRNA-1
chr10_pilon_pilon	maker	CDS	1456392	1456472	.	+	2	ID=vitri10g00840-mRNA-1:cds;Parent=vitri10g00840-mRNA-1
chr10_pilon_pilon	maker	exon	1456587	1456861	.	+	.	ID=vitri10g00840-mRNA-1:exon:249;Parent=vitri10g00840-mRNA-1
chr10_pilon_pilon	maker	CDS	1456587	1456861	.	+	2	ID=vitri10g00840-mRNA-1:cds;Parent=vitri10g00840-mRNA-1
chr10_pilon_pilon	maker	CDS	1456964	1457137	.	+	0	ID=vitri10g00840-mRNA-1:cds;Parent=vitri10g00840-mRNA-1
chr10_pilon_pilon	maker	exon	1456964	1457295	.	+	.	ID=vitri10g00840-mRNA-1:exon:250;Parent=vitri10g00840-mRNA-1
chr10_pilon_pilon	maker	three_prime_UTR	1457138	1457295	.	+	.	ID=vitri10g00840-mRNA-1:three_prime_utr;Parent=vitri10g00840-mRNA-1
###
chr10_pilon_pilon	maker	gene	1460446	1464317	.	-	.	ID=vitri10g00850;Name=vitri10g00850;Note=Similar to FBXL20: F-box/LRR-repeat protein 20 (Homo sapiens OX%3D9606);Dbxref=Gene3D:G3DSA:3.80.10.10,InterPro:IPR001611,InterPro:IPR006553,InterPro:IPR032675,PANTHER:PTHR45191,Pfam:PF13516,SMART:SM00367,SUPERFAMILY:SSF52047;Ontology_term=GO:0005515
chr10_pilon_pilon	maker	mRNA	1460446	1464317	.	-	.	ID=vitri10g00850-mRNA-1;Parent=vitri10g00850;Name=vitri10g00850-mRNA-1;_AED=0.00;_eAED=0.00;_QI=234|1|1|1|1|1|2|603|413;Note=Similar to FBXL20: F-box/LRR-repeat protein 20 (Homo sapiens OX%3D9606);Dbxref=Gene3D:G3DSA:3.80.10.10,InterPro:IPR001611,InterPro:IPR006553,InterPro:IPR032675,PANTHER:PTHR45191,Pfam:PF13516,SMART:SM00367,SUPERFAMILY:SSF52047;Ontology_term=GO:0005515
chr10_pilon_pilon	maker	three_prime_UTR	1460446	1461048	.	-	.	ID=vitri10g00850-mRNA-1:three_prime_utr;Parent=vitri10g00850-mRNA-1
chr10_pilon_pilon	maker	exon	1460446	1461944	.	-	.	ID=vitri10g00850-mRNA-1:exon:283;Parent=vitri10g00850-mRNA-1
chr10_pilon_pilon	maker	CDS	1461049	1461944	.	-	2	ID=vitri10g00850-mRNA-1:cds;Parent=vitri10g00850-mRNA-1
chr10_pilon_pilon	maker	CDS	1463738	1464083	.	-	0	ID=vitri10g00850-mRNA-1:cds;Parent=vitri10g00850-mRNA-1
chr10_pilon_pilon	maker	exon	1463738	1464317	.	-	.	ID=vitri10g00850-mRNA-1:exon:282;Parent=vitri10g00850-mRNA-1
chr10_pilon_pilon	maker	five_prime_UTR	1464084	1464317	.	-	.	ID=vitri10g00850-mRNA-1:five_prime_utr;Parent=vitri10g00850-mRNA-1
###
chr10_pilon_pilon	maker	gene	1465181	1468952	.	-	.	ID=vitri10g00860;Name=vitri10g00860;Note=Similar to TMEM53: Transmembrane protein 53 (Bos taurus OX%3D9913);Dbxref=Gene3D:G3DSA:3.40.50.1820,InterPro:IPR008547,InterPro:IPR029058,PANTHER:PTHR12265,PANTHER:PTHR12265:SF27,Pfam:PF05705,SUPERFAMILY:SSF53474
chr10_pilon_pilon	maker	mRNA	1465181	1468170	.	-	.	ID=vitri10g00860-mRNA-3;Parent=vitri10g00860;Name=vitri10g00860-mRNA-3;_AED=0.16;_eAED=0.16;_QI=446|1|1|1|0.75|0.6|5|235|442;Note=Protein of unknown function;Dbxref=Gene3D:G3DSA:3.40.50.1820,InterPro:IPR008547,InterPro:IPR029058,PANTHER:PTHR12265,PANTHER:PTHR12265:SF27,Pfam:PF05705,SUPERFAMILY:SSF53474
chr10_pilon_pilon	maker	three_prime_UTR	1465181	1465415	.	-	.	ID=vitri10g00860-mRNA-3:three_prime_utr;Parent=vitri10g00860-mRNA-3
chr10_pilon_pilon	maker	CDS	1465416	1465686	.	-	1	ID=vitri10g00860-mRNA-3:cds;Parent=vitri10g00860-mRNA-3
chr10_pilon_pilon	maker	CDS	1465840	1466045	.	-	0	ID=vitri10g00860-mRNA-3:cds;Parent=vitri10g00860-mRNA-3
chr10_pilon_pilon	maker	CDS	1466639	1466744	.	-	1	ID=vitri10g00860-mRNA-3:cds;Parent=vitri10g00860-mRNA-3
chr10_pilon_pilon	maker	CDS	1466839	1467584	.	-	0	ID=vitri10g00860-mRNA-3:cds;Parent=vitri10g00860-mRNA-3
chr10_pilon_pilon	maker	five_prime_UTR	1467585	1467713	.	-	.	ID=vitri10g00860-mRNA-3:five_prime_utr;Parent=vitri10g00860-mRNA-3
chr10_pilon_pilon	maker	exon	1467854	1468170	.	-	.	ID=vitri10g00860-mRNA-3:exon:291;Parent=vitri10g00860-mRNA-3
chr10_pilon_pilon	maker	five_prime_UTR	1467854	1468170	.	-	.	ID=vitri10g00860-mRNA-3:five_prime_utr;Parent=vitri10g00860-mRNA-3
chr10_pilon_pilon	maker	mRNA	1465181	1468170	.	-	.	ID=vitri10g00860-mRNA-5;Parent=vitri10g00860;Name=vitri10g00860-mRNA-5;_AED=0.14;_eAED=0.14;_QI=586|1|1|1|1|1|4|235|442;Note=Similar to TMEM53: Transmembrane protein 53 (Bos taurus OX%3D9913);Dbxref=Gene3D:G3DSA:3.40.50.1820,InterPro:IPR008547,InterPro:IPR029058,PANTHER:PTHR12265,PANTHER:PTHR12265:SF27,Pfam:PF05705,SUPERFAMILY:SSF53474
chr10_pilon_pilon	maker	three_prime_UTR	1465181	1465415	.	-	.	ID=vitri10g00860-mRNA-5:three_prime_utr;Parent=vitri10g00860-mRNA-5
chr10_pilon_pilon	maker	CDS	1465416	1465686	.	-	1	ID=vitri10g00860-mRNA-5:cds;Parent=vitri10g00860-mRNA-5
chr10_pilon_pilon	maker	CDS	1465840	1466045	.	-	0	ID=vitri10g00860-mRNA-5:cds;Parent=vitri10g00860-mRNA-5
chr10_pilon_pilon	maker	CDS	1466639	1466744	.	-	1	ID=vitri10g00860-mRNA-5:cds;Parent=vitri10g00860-mRNA-5
chr10_pilon_pilon	maker	CDS	1466839	1467584	.	-	0	ID=vitri10g00860-mRNA-5:cds;Parent=vitri10g00860-mRNA-5
chr10_pilon_pilon	maker	exon	1466839	1468170	.	-	.	ID=vitri10g00860-mRNA-5:exon:293;Parent=vitri10g00860-mRNA-5
chr10_pilon_pilon	maker	five_prime_UTR	1467585	1468170	.	-	.	ID=vitri10g00860-mRNA-5:five_prime_utr;Parent=vitri10g00860-mRNA-5
chr10_pilon_pilon	maker	mRNA	1465181	1468565	.	-	.	ID=vitri10g00860-mRNA-2;Parent=vitri10g00860;Name=vitri10g00860-mRNA-2;_AED=0.19;_eAED=0.19;_QI=0|0.8|0.83|1|1|0.83|6|1592|84;Note=Protein of unknown function
chr10_pilon_pilon	maker	three_prime_UTR	1465181	1465686	.	-	.	ID=vitri10g00860-mRNA-2:three_prime_utr;Parent=vitri10g00860-mRNA-2
chr10_pilon_pilon	maker	three_prime_UTR	1465840	1466045	.	-	.	ID=vitri10g00860-mRNA-2:three_prime_utr;Parent=vitri10g00860-mRNA-2
chr10_pilon_pilon	maker	three_prime_UTR	1466639	1466744	.	-	.	ID=vitri10g00860-mRNA-2:three_prime_utr;Parent=vitri10g00860-mRNA-2
chr10_pilon_pilon	maker	three_prime_UTR	1466839	1467612	.	-	.	ID=vitri10g00860-mRNA-2:three_prime_utr;Parent=vitri10g00860-mRNA-2
chr10_pilon_pilon	maker	CDS	1467613	1467713	.	-	2	ID=vitri10g00860-mRNA-2:cds;Parent=vitri10g00860-mRNA-2
chr10_pilon_pilon	maker	CDS	1468192	1468302	.	-	2	ID=vitri10g00860-mRNA-2:cds;Parent=vitri10g00860-mRNA-2
chr10_pilon_pilon	maker	CDS	1468523	1468565	.	-	0	ID=vitri10g00860-mRNA-2:cds;Parent=vitri10g00860-mRNA-2
chr10_pilon_pilon	maker	mRNA	1465181	1468565	.	-	.	ID=vitri10g00860-mRNA-4;Parent=vitri10g00860;Name=vitri10g00860-mRNA-4;_AED=0.17;_eAED=0.17;_QI=0|0.75|0.8|1|1|0.8|5|1686|84;Note=Protein of unknown function
chr10_pilon_pilon	maker	three_prime_UTR	1465181	1465686	.	-	.	ID=vitri10g00860-mRNA-4:three_prime_utr;Parent=vitri10g00860-mRNA-4
chr10_pilon_pilon	maker	three_prime_UTR	1465840	1466045	.	-	.	ID=vitri10g00860-mRNA-4:three_prime_utr;Parent=vitri10g00860-mRNA-4
chr10_pilon_pilon	maker	three_prime_UTR	1466639	1467612	.	-	.	ID=vitri10g00860-mRNA-4:three_prime_utr;Parent=vitri10g00860-mRNA-4
chr10_pilon_pilon	maker	exon	1466639	1467713	.	-	.	ID=vitri10g00860-mRNA-4:exon:292;Parent=vitri10g00860-mRNA-4
chr10_pilon_pilon	maker	CDS	1467613	1467713	.	-	2	ID=vitri10g00860-mRNA-4:cds;Parent=vitri10g00860-mRNA-4
chr10_pilon_pilon	maker	CDS	1468192	1468302	.	-	2	ID=vitri10g00860-mRNA-4:cds;Parent=vitri10g00860-mRNA-4
chr10_pilon_pilon	maker	exon	1468523	1468565	.	-	.	ID=vitri10g00860-mRNA-2:exon:290;Parent=vitri10g00860-mRNA-2,vitri10g00860-mRNA-4
chr10_pilon_pilon	maker	CDS	1468523	1468565	.	-	0	ID=vitri10g00860-mRNA-4:cds;Parent=vitri10g00860-mRNA-4
chr10_pilon_pilon	maker	mRNA	1465181	1468952	.	-	.	ID=vitri10g00860-mRNA-1;Parent=vitri10g00860;Name=vitri10g00860-mRNA-1;_AED=0.16;_eAED=0.16;_QI=422|1|1|1|0.8|0.66|6|235|442;Note=Protein of unknown function;Dbxref=Gene3D:G3DSA:3.40.50.1820,InterPro:IPR008547,InterPro:IPR029058,PANTHER:PTHR12265,PANTHER:PTHR12265:SF27,Pfam:PF05705,SUPERFAMILY:SSF53474
chr10_pilon_pilon	maker	three_prime_UTR	1465181	1465415	.	-	.	ID=vitri10g00860-mRNA-1:three_prime_utr;Parent=vitri10g00860-mRNA-1
chr10_pilon_pilon	maker	exon	1465181	1465686	.	-	.	ID=vitri10g00860-mRNA-1:exon:289;Parent=vitri10g00860-mRNA-3,vitri10g00860-mRNA-5,vitri10g00860-mRNA-2,vitri10g00860-mRNA-4,vitri10g00860-mRNA-1
chr10_pilon_pilon	maker	CDS	1465416	1465686	.	-	1	ID=vitri10g00860-mRNA-1:cds;Parent=vitri10g00860-mRNA-1
chr10_pilon_pilon	maker	exon	1465840	1466045	.	-	.	ID=vitri10g00860-mRNA-1:exon:288;Parent=vitri10g00860-mRNA-3,vitri10g00860-mRNA-5,vitri10g00860-mRNA-2,vitri10g00860-mRNA-4,vitri10g00860-mRNA-1
chr10_pilon_pilon	maker	CDS	1465840	1466045	.	-	0	ID=vitri10g00860-mRNA-1:cds;Parent=vitri10g00860-mRNA-1
chr10_pilon_pilon	maker	exon	1466639	1466744	.	-	.	ID=vitri10g00860-mRNA-1:exon:287;Parent=vitri10g00860-mRNA-3,vitri10g00860-mRNA-5,vitri10g00860-mRNA-2,vitri10g00860-mRNA-1
chr10_pilon_pilon	maker	CDS	1466639	1466744	.	-	1	ID=vitri10g00860-mRNA-1:cds;Parent=vitri10g00860-mRNA-1
chr10_pilon_pilon	maker	CDS	1466839	1467584	.	-	0	ID=vitri10g00860-mRNA-1:cds;Parent=vitri10g00860-mRNA-1
chr10_pilon_pilon	maker	exon	1466839	1467713	.	-	.	ID=vitri10g00860-mRNA-1:exon:286;Parent=vitri10g00860-mRNA-3,vitri10g00860-mRNA-2,vitri10g00860-mRNA-1
chr10_pilon_pilon	maker	five_prime_UTR	1467585	1467713	.	-	.	ID=vitri10g00860-mRNA-1:five_prime_utr;Parent=vitri10g00860-mRNA-1
chr10_pilon_pilon	maker	exon	1468192	1468302	.	-	.	ID=vitri10g00860-mRNA-1:exon:285;Parent=vitri10g00860-mRNA-2,vitri10g00860-mRNA-4,vitri10g00860-mRNA-1
chr10_pilon_pilon	maker	five_prime_UTR	1468192	1468302	.	-	.	ID=vitri10g00860-mRNA-1:five_prime_utr;Parent=vitri10g00860-mRNA-1
chr10_pilon_pilon	maker	exon	1468771	1468952	.	-	.	ID=vitri10g00860-mRNA-1:exon:284;Parent=vitri10g00860-mRNA-1
chr10_pilon_pilon	maker	five_prime_UTR	1468771	1468952	.	-	.	ID=vitri10g00860-mRNA-1:five_prime_utr;Parent=vitri10g00860-mRNA-1
###
chr10_pilon_pilon	maker	gene	1489796	1494436	.	-	.	ID=vitri10g00870;Name=vitri10g00870;Note=Similar to RIBF1: FAD synthetase 1%2C chloroplastic (Arabidopsis thaliana OX%3D3702);Dbxref=Gene3D:G3DSA:3.40.50.620,InterPro:IPR014729,InterPro:IPR015864,PANTHER:PTHR12714,PANTHER:PTHR12714:SF4,Pfam:PF06574,SUPERFAMILY:SSF52374;Ontology_term=GO:0003919,GO:0009231
chr10_pilon_pilon	maker	mRNA	1489796	1494436	.	-	.	ID=vitri10g00870-mRNA-1;Parent=vitri10g00870;Name=vitri10g00870-mRNA-1;_AED=0.05;_eAED=0.05;_QI=151|1|1|1|1|1|4|178|276;Note=Similar to RIBF1: FAD synthetase 1%2C chloroplastic (Arabidopsis thaliana OX%3D3702);Dbxref=Gene3D:G3DSA:3.40.50.620,InterPro:IPR014729,InterPro:IPR015864,PANTHER:PTHR12714,PANTHER:PTHR12714:SF4,Pfam:PF06574,SUPERFAMILY:SSF52374;Ontology_term=GO:0003919,GO:0009231
chr10_pilon_pilon	maker	three_prime_UTR	1489796	1489973	.	-	.	ID=vitri10g00870-mRNA-1:three_prime_utr;Parent=vitri10g00870-mRNA-1
chr10_pilon_pilon	maker	exon	1489796	1490476	.	-	.	ID=vitri10g00870-mRNA-1:exon:409;Parent=vitri10g00870-mRNA-1
chr10_pilon_pilon	maker	CDS	1489974	1490476	.	-	2	ID=vitri10g00870-mRNA-1:cds;Parent=vitri10g00870-mRNA-1
chr10_pilon_pilon	maker	exon	1490588	1490763	.	-	.	ID=vitri10g00870-mRNA-1:exon:408;Parent=vitri10g00870-mRNA-1
chr10_pilon_pilon	maker	CDS	1490588	1490763	.	-	1	ID=vitri10g00870-mRNA-1:cds;Parent=vitri10g00870-mRNA-1
chr10_pilon_pilon	maker	exon	1492279	1492417	.	-	.	ID=vitri10g00870-mRNA-1:exon:407;Parent=vitri10g00870-mRNA-1
chr10_pilon_pilon	maker	CDS	1492279	1492417	.	-	2	ID=vitri10g00870-mRNA-1:cds;Parent=vitri10g00870-mRNA-1
chr10_pilon_pilon	maker	CDS	1494273	1494285	.	-	0	ID=vitri10g00870-mRNA-1:cds;Parent=vitri10g00870-mRNA-1
chr10_pilon_pilon	maker	exon	1494273	1494436	.	-	.	ID=vitri10g00870-mRNA-1:exon:406;Parent=vitri10g00870-mRNA-1
chr10_pilon_pilon	maker	five_prime_UTR	1494286	1494436	.	-	.	ID=vitri10g00870-mRNA-1:five_prime_utr;Parent=vitri10g00870-mRNA-1
###
chr10_pilon_pilon	maker	gene	1552559	1554386	.	+	.	ID=vitri10g00880;Name=vitri10g00880;Note=Similar to SSL10: Protein STRICTOSIDINE SYNTHASE-LIKE 10 (Arabidopsis thaliana OX%3D3702);Dbxref=Gene3D:G3DSA:2.120.10.30,InterPro:IPR004141,InterPro:IPR011042,InterPro:IPR018119,PANTHER:PTHR10426,PANTHER:PTHR10426:SF33,Pfam:PF03088,SUPERFAMILY:SSF63829;Ontology_term=GO:0009058,GO:0016844
chr10_pilon_pilon	maker	mRNA	1552559	1554386	.	+	.	ID=vitri10g00880-mRNA-1;Parent=vitri10g00880;Name=vitri10g00880-mRNA-1;_AED=0.05;_eAED=0.05;_QI=34|1|1|1|1|1|3|367|335;Note=Similar to SSL10: Protein STRICTOSIDINE SYNTHASE-LIKE 10 (Arabidopsis thaliana OX%3D3702);Dbxref=Gene3D:G3DSA:2.120.10.30,InterPro:IPR004141,InterPro:IPR011042,InterPro:IPR018119,PANTHER:PTHR10426,PANTHER:PTHR10426:SF33,Pfam:PF03088,SUPERFAMILY:SSF63829;Ontology_term=GO:0009058,GO:0016844
chr10_pilon_pilon	maker	five_prime_UTR	1552559	1552592	.	+	.	ID=vitri10g00880-mRNA-1:five_prime_utr;Parent=vitri10g00880-mRNA-1
chr10_pilon_pilon	maker	exon	1552559	1552858	.	+	.	ID=vitri10g00880-mRNA-1:exon:399;Parent=vitri10g00880-mRNA-1
chr10_pilon_pilon	maker	CDS	1552593	1552858	.	+	0	ID=vitri10g00880-mRNA-1:cds;Parent=vitri10g00880-mRNA-1
chr10_pilon_pilon	maker	exon	1553151	1553420	.	+	.	ID=vitri10g00880-mRNA-1:exon:400;Parent=vitri10g00880-mRNA-1
chr10_pilon_pilon	maker	CDS	1553151	1553420	.	+	1	ID=vitri10g00880-mRNA-1:cds;Parent=vitri10g00880-mRNA-1
chr10_pilon_pilon	maker	CDS	1553548	1554019	.	+	1	ID=vitri10g00880-mRNA-1:cds;Parent=vitri10g00880-mRNA-1
chr10_pilon_pilon	maker	exon	1553548	1554386	.	+	.	ID=vitri10g00880-mRNA-1:exon:401;Parent=vitri10g00880-mRNA-1
chr10_pilon_pilon	maker	three_prime_UTR	1554020	1554386	.	+	.	ID=vitri10g00880-mRNA-1:three_prime_utr;Parent=vitri10g00880-mRNA-1
###
chr10_pilon_pilon	maker	gene	1572972	1574609	.	+	.	ID=vitri10g00890;Name=vitri10g00890;Note=Protein of unknown function;Dbxref=Gene3D:G3DSA:2.120.10.30,InterPro:IPR004141,InterPro:IPR011042,InterPro:IPR018119,PANTHER:PTHR10426,PANTHER:PTHR10426:SF33,Pfam:PF03088,SUPERFAMILY:SSF63829;Ontology_term=GO:0009058,GO:0016844
chr10_pilon_pilon	maker	mRNA	1572972	1574609	.	+	.	ID=vitri10g00890-mRNA-1;Parent=vitri10g00890;Name=vitri10g00890-mRNA-1;_AED=0.18;_eAED=0.22;_QI=0|0.33|0.25|1|1|1|4|367|250;Note=Protein of unknown function;Dbxref=Gene3D:G3DSA:2.120.10.30,InterPro:IPR004141,InterPro:IPR011042,InterPro:IPR018119,PANTHER:PTHR10426,PANTHER:PTHR10426:SF33,Pfam:PF03088,SUPERFAMILY:SSF63829;Ontology_term=GO:0009058,GO:0016844
chr10_pilon_pilon	maker	exon	1572972	1573033	.	+	.	ID=vitri10g00890-mRNA-1:exon:402;Parent=vitri10g00890-mRNA-1
chr10_pilon_pilon	maker	CDS	1572972	1573033	.	+	0	ID=vitri10g00890-mRNA-1:cds;Parent=vitri10g00890-mRNA-1
chr10_pilon_pilon	maker	exon	1573364	1573409	.	+	.	ID=vitri10g00890-mRNA-1:exon:403;Parent=vitri10g00890-mRNA-1
chr10_pilon_pilon	maker	CDS	1573364	1573409	.	+	1	ID=vitri10g00890-mRNA-1:cds;Parent=vitri10g00890-mRNA-1
chr10_pilon_pilon	maker	exon	1573471	1573643	.	+	.	ID=vitri10g00890-mRNA-1:exon:404;Parent=vitri10g00890-mRNA-1
chr10_pilon_pilon	maker	CDS	1573471	1573643	.	+	0	ID=vitri10g00890-mRNA-1:cds;Parent=vitri10g00890-mRNA-1
chr10_pilon_pilon	maker	CDS	1573771	1574242	.	+	1	ID=vitri10g00890-mRNA-1:cds;Parent=vitri10g00890-mRNA-1
chr10_pilon_pilon	maker	exon	1573771	1574609	.	+	.	ID=vitri10g00890-mRNA-1:exon:405;Parent=vitri10g00890-mRNA-1
chr10_pilon_pilon	maker	three_prime_UTR	1574243	1574609	.	+	.	ID=vitri10g00890-mRNA-1:three_prime_utr;Parent=vitri10g00890-mRNA-1
###
chr10_pilon_pilon	maker	gene	1586640	1594623	.	+	.	ID=vitri10g00900;Name=vitri10g00900;Note=Protein of unknown function;Dbxref=InterPro:IPR013601,Pfam:PF08392;Ontology_term=GO:0006633,GO:0016020,GO:0016747
chr10_pilon_pilon	maker	mRNA	1586640	1594623	.	+	.	ID=vitri10g00900-mRNA-1;Parent=vitri10g00900;Name=vitri10g00900-mRNA-1;_AED=0.43;_eAED=0.48;_QI=71|0|0|1|0|0.25|4|0|199;Note=Protein of unknown function;Dbxref=InterPro:IPR013601,Pfam:PF08392;Ontology_term=GO:0006633,GO:0016020,GO:0016747
chr10_pilon_pilon	maker	five_prime_UTR	1586640	1586710	.	+	.	ID=vitri10g00900-mRNA-1:five_prime_utr;Parent=vitri10g00900-mRNA-1
chr10_pilon_pilon	maker	exon	1586640	1586801	.	+	.	ID=vitri10g00900-mRNA-1:exon:438;Parent=vitri10g00900-mRNA-1
chr10_pilon_pilon	maker	CDS	1586711	1586801	.	+	0	ID=vitri10g00900-mRNA-1:cds;Parent=vitri10g00900-mRNA-1
chr10_pilon_pilon	maker	exon	1587661	1587734	.	+	.	ID=vitri10g00900-mRNA-1:exon:439;Parent=vitri10g00900-mRNA-1
chr10_pilon_pilon	maker	CDS	1587661	1587734	.	+	2	ID=vitri10g00900-mRNA-1:cds;Parent=vitri10g00900-mRNA-1
chr10_pilon_pilon	maker	exon	1588856	1588954	.	+	.	ID=vitri10g00900-mRNA-1:exon:440;Parent=vitri10g00900-mRNA-1
chr10_pilon_pilon	maker	CDS	1588856	1588954	.	+	0	ID=vitri10g00900-mRNA-1:cds;Parent=vitri10g00900-mRNA-1
chr10_pilon_pilon	maker	exon	1594291	1594623	.	+	.	ID=vitri10g00900-mRNA-1:exon:441;Parent=vitri10g00900-mRNA-1
chr10_pilon_pilon	maker	CDS	1594291	1594623	.	+	0	ID=vitri10g00900-mRNA-1:cds;Parent=vitri10g00900-mRNA-1
###
chr10_pilon_pilon	maker	gene	1600136	1609998	.	-	.	ID=vitri10g00910;Name=vitri10g00910;Note=Protein of unknown function
chr10_pilon_pilon	maker	mRNA	1600136	1609998	.	-	.	ID=vitri10g00910-mRNA-1;Parent=vitri10g00910;Name=vitri10g00910-mRNA-1;_AED=0.29;_eAED=1.00;_QI=91|0|0|1|0|0|2|0|55;Note=Protein of unknown function
chr10_pilon_pilon	maker	exon	1600136	1600297	.	-	.	ID=vitri10g00910-mRNA-1:exon:449;Parent=vitri10g00910-mRNA-1
chr10_pilon_pilon	maker	CDS	1600136	1600297	.	-	0	ID=vitri10g00910-mRNA-1:cds;Parent=vitri10g00910-mRNA-1
chr10_pilon_pilon	maker	CDS	1609905	1609907	.	-	0	ID=vitri10g00910-mRNA-1:cds;Parent=vitri10g00910-mRNA-1
chr10_pilon_pilon	maker	exon	1609905	1609998	.	-	.	ID=vitri10g00910-mRNA-1:exon:450;Parent=vitri10g00910-mRNA-1
chr10_pilon_pilon	maker	five_prime_UTR	1609908	1609998	.	-	.	ID=vitri10g00910-mRNA-1:five_prime_utr;Parent=vitri10g00910-mRNA-1
###
chr10_pilon_pilon	maker	gene	1613701	1614271	.	+	.	ID=vitri10g00920;Name=vitri10g00920;Note=Protein of unknown function;Dbxref=MobiDBLite:mobidb-lite
chr10_pilon_pilon	maker	mRNA	1613701	1614271	.	+	.	ID=vitri10g00920-mRNA-1;Parent=vitri10g00920;Name=vitri10g00920-mRNA-1;_AED=0.35;_eAED=0.35;_QI=0|0|0|1|0|0|2|0|159;Note=Protein of unknown function;Dbxref=MobiDBLite:mobidb-lite
chr10_pilon_pilon	maker	exon	1613701	1613838	.	+	.	ID=vitri10g00920-mRNA-1:exon:445;Parent=vitri10g00920-mRNA-1
chr10_pilon_pilon	maker	CDS	1613701	1613838	.	+	0	ID=vitri10g00920-mRNA-1:cds;Parent=vitri10g00920-mRNA-1
chr10_pilon_pilon	maker	exon	1613930	1614271	.	+	.	ID=vitri10g00920-mRNA-1:exon:446;Parent=vitri10g00920-mRNA-1
chr10_pilon_pilon	maker	CDS	1613930	1614271	.	+	0	ID=vitri10g00920-mRNA-1:cds;Parent=vitri10g00920-mRNA-1
###
chr10_pilon_pilon	maker	gene	1623475	1627212	.	-	.	ID=vitri10g00930;Name=vitri10g00930;Note=Similar to EIX2: Receptor-like protein EIX2 (Solanum lycopersicum OX%3D4081);Dbxref=Gene3D:G3DSA:3.80.10.10,InterPro:IPR001611,InterPro:IPR003591,InterPro:IPR013210,InterPro:IPR032675,PANTHER:PTHR27004,PANTHER:PTHR27004:SF41,Pfam:PF00560,Pfam:PF08263,Pfam:PF13855,SMART:SM00369,SUPERFAMILY:SSF52058;Ontology_term=GO:0005515
chr10_pilon_pilon	maker	mRNA	1623475	1627212	.	-	.	ID=vitri10g00930-mRNA-1;Parent=vitri10g00930;Name=vitri10g00930-mRNA-1;_AED=0.07;_eAED=0.07;_QI=0|0|0|0.33|1|1|3|0|1106;Note=Similar to EIX2: Receptor-like protein EIX2 (Solanum lycopersicum OX%3D4081);Dbxref=Gene3D:G3DSA:3.80.10.10,InterPro:IPR001611,InterPro:IPR003591,InterPro:IPR013210,InterPro:IPR032675,PANTHER:PTHR27004,PANTHER:PTHR27004:SF41,Pfam:PF00560,Pfam:PF08263,Pfam:PF13855,SMART:SM00369,SUPERFAMILY:SSF52058;Ontology_term=GO:0005515
chr10_pilon_pilon	maker	exon	1623475	1626386	.	-	.	ID=vitri10g00930-mRNA-1:exon:442;Parent=vitri10g00930-mRNA-1
chr10_pilon_pilon	maker	CDS	1623475	1626386	.	-	2	ID=vitri10g00930-mRNA-1:cds;Parent=vitri10g00930-mRNA-1
chr10_pilon_pilon	maker	exon	1626716	1626802	.	-	.	ID=vitri10g00930-mRNA-1:exon:443;Parent=vitri10g00930-mRNA-1
chr10_pilon_pilon	maker	CDS	1626716	1626802	.	-	2	ID=vitri10g00930-mRNA-1:cds;Parent=vitri10g00930-mRNA-1
chr10_pilon_pilon	maker	exon	1626891	1627212	.	-	.	ID=vitri10g00930-mRNA-1:exon:444;Parent=vitri10g00930-mRNA-1
chr10_pilon_pilon	maker	CDS	1626891	1627212	.	-	0	ID=vitri10g00930-mRNA-1:cds;Parent=vitri10g00930-mRNA-1
###
chr10_pilon_pilon	maker	gene	1623617	1624564	.	+	.	ID=vitri10g00940;Name=vitri10g00940;Note=Protein of unknown function;Dbxref=MobiDBLite:mobidb-lite
chr10_pilon_pilon	maker	mRNA	1623617	1624564	.	+	.	ID=vitri10g00940-mRNA-1;Parent=vitri10g00940;Name=vitri10g00940-mRNA-1;_AED=0.41;_eAED=0.42;_QI=0|0|0|0.5|1|1|2|0|118;Note=Protein of unknown function;Dbxref=MobiDBLite:mobidb-lite
chr10_pilon_pilon	maker	exon	1623617	1623700	.	+	.	ID=vitri10g00940-mRNA-1:exon:451;Parent=vitri10g00940-mRNA-1
chr10_pilon_pilon	maker	CDS	1623617	1623700	.	+	0	ID=vitri10g00940-mRNA-1:cds;Parent=vitri10g00940-mRNA-1
chr10_pilon_pilon	maker	exon	1624292	1624564	.	+	.	ID=vitri10g00940-mRNA-1:exon:452;Parent=vitri10g00940-mRNA-1
chr10_pilon_pilon	maker	CDS	1624292	1624564	.	+	0	ID=vitri10g00940-mRNA-1:cds;Parent=vitri10g00940-mRNA-1
###
chr10_pilon_pilon	maker	gene	1649477	1679700	.	+	.	ID=vitri10g00950;Name=vitri10g00950;Note=Similar to VIII-1: Myosin-1 (Arabidopsis thaliana OX%3D3702);Dbxref=CDD:cd01383,Coils:Coil,Gene3D:G3DSA:1.20.120.720,Gene3D:G3DSA:1.20.5.190,Gene3D:G3DSA:1.20.58.530,Gene3D:G3DSA:2.30.30.360,Gene3D:G3DSA:3.30.70.3240,Gene3D:G3DSA:3.40.850.10,InterPro:IPR000048,InterPro:IPR001609,InterPro:IPR004009,InterPro:IPR008989,InterPro:IPR027417,InterPro:IPR036022,InterPro:IPR036961,MobiDBLite:mobidb-lite,PANTHER:PTHR13140,PANTHER:PTHR13140:SF685,PRINTS:PR00193,Pfam:PF00063,Pfam:PF00612,ProSiteProfiles:PS50096,ProSiteProfiles:PS51456,ProSiteProfiles:PS51844,SMART:SM00015,SMART:SM00242,SUPERFAMILY:SSF52540;Ontology_term=GO:0003774,GO:0003777,GO:0005515,GO:0005524,GO:0007018,GO:0008017,GO:0016459,GO:0051015
chr10_pilon_pilon	maker	mRNA	1649477	1679700	.	+	.	ID=vitri10g00950-mRNA-2;Parent=vitri10g00950;Name=vitri10g00950-mRNA-2;_AED=0.12;_eAED=0.12;_QI=0|0.95|0.95|1|0.73|0.75|24|4276|119;Note=Protein of unknown function
chr10_pilon_pilon	maker	exon	1649477	1649765	.	+	.	ID=vitri10g00950-mRNA-2:exon:434;Parent=vitri10g00950-mRNA-2
chr10_pilon_pilon	maker	CDS	1649477	1649765	.	+	0	ID=vitri10g00950-mRNA-2:cds;Parent=vitri10g00950-mRNA-2
chr10_pilon_pilon	maker	CDS	1650996	1651061	.	+	2	ID=vitri10g00950-mRNA-2:cds;Parent=vitri10g00950-mRNA-2
chr10_pilon_pilon	maker	CDS	1651172	1651176	.	+	2	ID=vitri10g00950-mRNA-2:cds;Parent=vitri10g00950-mRNA-2
chr10_pilon_pilon	maker	three_prime_UTR	1651177	1651980	.	+	.	ID=vitri10g00950-mRNA-2:three_prime_utr;Parent=vitri10g00950-mRNA-2
chr10_pilon_pilon	maker	three_prime_UTR	1654791	1654892	.	+	.	ID=vitri10g00950-mRNA-2:three_prime_utr;Parent=vitri10g00950-mRNA-2
chr10_pilon_pilon	maker	three_prime_UTR	1654983	1655126	.	+	.	ID=vitri10g00950-mRNA-2:three_prime_utr;Parent=vitri10g00950-mRNA-2
chr10_pilon_pilon	maker	three_prime_UTR	1655233	1655383	.	+	.	ID=vitri10g00950-mRNA-2:three_prime_utr;Parent=vitri10g00950-mRNA-2
chr10_pilon_pilon	maker	three_prime_UTR	1655461	1655488	.	+	.	ID=vitri10g00950-mRNA-2:three_prime_utr;Parent=vitri10g00950-mRNA-2
chr10_pilon_pilon	maker	three_prime_UTR	1656909	1657074	.	+	.	ID=vitri10g00950-mRNA-2:three_prime_utr;Parent=vitri10g00950-mRNA-2
chr10_pilon_pilon	maker	exon	1657257	1657320	.	+	.	ID=vitri10g00950-mRNA-2:exon:435;Parent=vitri10g00950-mRNA-2
chr10_pilon_pilon	maker	three_prime_UTR	1657257	1657320	.	+	.	ID=vitri10g00950-mRNA-2:three_prime_utr;Parent=vitri10g00950-mRNA-2
chr10_pilon_pilon	maker	exon	1657542	1657638	.	+	.	ID=vitri10g00950-mRNA-2:exon:436;Parent=vitri10g00950-mRNA-2
chr10_pilon_pilon	maker	three_prime_UTR	1657542	1657638	.	+	.	ID=vitri10g00950-mRNA-2:three_prime_utr;Parent=vitri10g00950-mRNA-2
chr10_pilon_pilon	maker	three_prime_UTR	1659430	1659533	.	+	.	ID=vitri10g00950-mRNA-2:three_prime_utr;Parent=vitri10g00950-mRNA-2
chr10_pilon_pilon	maker	three_prime_UTR	1659654	1659792	.	+	.	ID=vitri10g00950-mRNA-2:three_prime_utr;Parent=vitri10g00950-mRNA-2
chr10_pilon_pilon	maker	three_prime_UTR	1662036	1662154	.	+	.	ID=vitri10g00950-mRNA-2:three_prime_utr;Parent=vitri10g00950-mRNA-2
chr10_pilon_pilon	maker	three_prime_UTR	1664647	1664799	.	+	.	ID=vitri10g00950-mRNA-2:three_prime_utr;Parent=vitri10g00950-mRNA-2
chr10_pilon_pilon	maker	three_prime_UTR	1664905	1664994	.	+	.	ID=vitri10g00950-mRNA-2:three_prime_utr;Parent=vitri10g00950-mRNA-2
chr10_pilon_pilon	maker	three_prime_UTR	1672196	1672273	.	+	.	ID=vitri10g00950-mRNA-2:three_prime_utr;Parent=vitri10g00950-mRNA-2
chr10_pilon_pilon	maker	three_prime_UTR	1673366	1673524	.	+	.	ID=vitri10g00950-mRNA-2:three_prime_utr;Parent=vitri10g00950-mRNA-2
chr10_pilon_pilon	maker	three_prime_UTR	1673955	1674161	.	+	.	ID=vitri10g00950-mRNA-2:three_prime_utr;Parent=vitri10g00950-mRNA-2
chr10_pilon_pilon	maker	three_prime_UTR	1675863	1676068	.	+	.	ID=vitri10g00950-mRNA-2:three_prime_utr;Parent=vitri10g00950-mRNA-2
chr10_pilon_pilon	maker	three_prime_UTR	1676191	1676326	.	+	.	ID=vitri10g00950-mRNA-2:three_prime_utr;Parent=vitri10g00950-mRNA-2
chr10_pilon_pilon	maker	three_prime_UTR	1676956	1677085	.	+	.	ID=vitri10g00950-mRNA-2:three_prime_utr;Parent=vitri10g00950-mRNA-2
chr10_pilon_pilon	maker	three_prime_UTR	1677190	1677336	.	+	.	ID=vitri10g00950-mRNA-2:three_prime_utr;Parent=vitri10g00950-mRNA-2
chr10_pilon_pilon	maker	three_prime_UTR	1677679	1677746	.	+	.	ID=vitri10g00950-mRNA-2:three_prime_utr;Parent=vitri10g00950-mRNA-2
chr10_pilon_pilon	maker	three_prime_UTR	1678717	1679700	.	+	.	ID=vitri10g00950-mRNA-2:three_prime_utr;Parent=vitri10g00950-mRNA-2
chr10_pilon_pilon	maker	mRNA	1650433	1679700	.	+	.	ID=vitri10g00950-mRNA-1;Parent=vitri10g00950;Name=vitri10g00950-mRNA-1;_AED=0.13;_eAED=0.13;_QI=786|0.91|0.91|0.95|0.73|0.75|24|324|1187;Note=Similar to VIII-1: Myosin-1 (Arabidopsis thaliana OX%3D3702);Dbxref=CDD:cd01383,Coils:Coil,Gene3D:G3DSA:1.20.120.720,Gene3D:G3DSA:1.20.5.190,Gene3D:G3DSA:1.20.58.530,Gene3D:G3DSA:2.30.30.360,Gene3D:G3DSA:3.30.70.3240,Gene3D:G3DSA:3.40.850.10,InterPro:IPR000048,InterPro:IPR001609,InterPro:IPR004009,InterPro:IPR008989,InterPro:IPR027417,InterPro:IPR036022,InterPro:IPR036961,MobiDBLite:mobidb-lite,PANTHER:PTHR13140,PANTHER:PTHR13140:SF685,PRINTS:PR00193,Pfam:PF00063,Pfam:PF00612,ProSiteProfiles:PS50096,ProSiteProfiles:PS51456,ProSiteProfiles:PS51844,SMART:SM00015,SMART:SM00242,SUPERFAMILY:SSF52540;Ontology_term=GO:0003774,GO:0003777,GO:0005515,GO:0005524,GO:0007018,GO:0008017,GO:0016459,GO:0051015
chr10_pilon_pilon	maker	exon	1650433	1650787	.	+	.	ID=vitri10g00950-mRNA-1:exon:410;Parent=vitri10g00950-mRNA-1
chr10_pilon_pilon	maker	five_prime_UTR	1650433	1650787	.	+	.	ID=vitri10g00950-mRNA-1:five_prime_utr;Parent=vitri10g00950-mRNA-1
chr10_pilon_pilon	maker	exon	1650996	1651061	.	+	.	ID=vitri10g00950-mRNA-1:exon:411;Parent=vitri10g00950-mRNA-2,vitri10g00950-mRNA-1
chr10_pilon_pilon	maker	five_prime_UTR	1650996	1651061	.	+	.	ID=vitri10g00950-mRNA-1:five_prime_utr;Parent=vitri10g00950-mRNA-1
chr10_pilon_pilon	maker	five_prime_UTR	1651172	1651536	.	+	.	ID=vitri10g00950-mRNA-1:five_prime_utr;Parent=vitri10g00950-mRNA-1
chr10_pilon_pilon	maker	CDS	1651537	1651980	.	+	0	ID=vitri10g00950-mRNA-1:cds;Parent=vitri10g00950-mRNA-1
chr10_pilon_pilon	maker	CDS	1654791	1654892	.	+	0	ID=vitri10g00950-mRNA-1:cds;Parent=vitri10g00950-mRNA-1
chr10_pilon_pilon	maker	CDS	1654983	1655126	.	+	0	ID=vitri10g00950-mRNA-1:cds;Parent=vitri10g00950-mRNA-1
chr10_pilon_pilon	maker	CDS	1655233	1655383	.	+	0	ID=vitri10g00950-mRNA-1:cds;Parent=vitri10g00950-mRNA-1
chr10_pilon_pilon	maker	CDS	1655461	1655488	.	+	2	ID=vitri10g00950-mRNA-1:cds;Parent=vitri10g00950-mRNA-1
chr10_pilon_pilon	maker	CDS	1656909	1657074	.	+	1	ID=vitri10g00950-mRNA-1:cds;Parent=vitri10g00950-mRNA-1
chr10_pilon_pilon	maker	CDS	1657257	1657325	.	+	0	ID=vitri10g00950-mRNA-1:cds;Parent=vitri10g00950-mRNA-1
chr10_pilon_pilon	maker	CDS	1658203	1658266	.	+	0	ID=vitri10g00950-mRNA-1:cds;Parent=vitri10g00950-mRNA-1
chr10_pilon_pilon	maker	CDS	1659430	1659533	.	+	2	ID=vitri10g00950-mRNA-1:cds;Parent=vitri10g00950-mRNA-1
chr10_pilon_pilon	maker	CDS	1659654	1659792	.	+	0	ID=vitri10g00950-mRNA-1:cds;Parent=vitri10g00950-mRNA-1
chr10_pilon_pilon	maker	CDS	1662036	1662154	.	+	2	ID=vitri10g00950-mRNA-1:cds;Parent=vitri10g00950-mRNA-1
chr10_pilon_pilon	maker	CDS	1664647	1664799	.	+	0	ID=vitri10g00950-mRNA-1:cds;Parent=vitri10g00950-mRNA-1
chr10_pilon_pilon	maker	CDS	1664905	1664994	.	+	0	ID=vitri10g00950-mRNA-1:cds;Parent=vitri10g00950-mRNA-1
chr10_pilon_pilon	maker	CDS	1672196	1672273	.	+	0	ID=vitri10g00950-mRNA-1:cds;Parent=vitri10g00950-mRNA-1
chr10_pilon_pilon	maker	CDS	1673366	1673524	.	+	0	ID=vitri10g00950-mRNA-1:cds;Parent=vitri10g00950-mRNA-1
chr10_pilon_pilon	maker	CDS	1673955	1674161	.	+	0	ID=vitri10g00950-mRNA-1:cds;Parent=vitri10g00950-mRNA-1
chr10_pilon_pilon	maker	CDS	1675863	1676068	.	+	0	ID=vitri10g00950-mRNA-1:cds;Parent=vitri10g00950-mRNA-1
chr10_pilon_pilon	maker	CDS	1676191	1676326	.	+	1	ID=vitri10g00950-mRNA-1:cds;Parent=vitri10g00950-mRNA-1
chr10_pilon_pilon	maker	CDS	1676956	1677085	.	+	0	ID=vitri10g00950-mRNA-1:cds;Parent=vitri10g00950-mRNA-1
chr10_pilon_pilon	maker	CDS	1677190	1677336	.	+	2	ID=vitri10g00950-mRNA-1:cds;Parent=vitri10g00950-mRNA-1
chr10_pilon_pilon	maker	CDS	1677679	1677746	.	+	2	ID=vitri10g00950-mRNA-1:cds;Parent=vitri10g00950-mRNA-1
chr10_pilon_pilon	maker	CDS	1678717	1679376	.	+	0	ID=vitri10g00950-mRNA-1:cds;Parent=vitri10g00950-mRNA-1
chr10_pilon_pilon	maker	three_prime_UTR	1679377	1679700	.	+	.	ID=vitri10g00950-mRNA-1:three_prime_utr;Parent=vitri10g00950-mRNA-1
chr10_pilon_pilon	maker	mRNA	1650433	1679700	.	+	.	ID=vitri10g00950-mRNA-3;Parent=vitri10g00950;Name=vitri10g00950-mRNA-3;_AED=0.11;_eAED=0.11;_QI=994|0.90|0.91|0.95|0.77|0.78|23|324|1187;Note=Similar to XI-C: Myosin-9 (Arabidopsis thaliana OX%3D3702);Dbxref=CDD:cd01383,Coils:Coil,Gene3D:G3DSA:1.20.120.720,Gene3D:G3DSA:1.20.5.190,Gene3D:G3DSA:1.20.58.530,Gene3D:G3DSA:2.30.30.360,Gene3D:G3DSA:3.30.70.3240,Gene3D:G3DSA:3.40.850.10,InterPro:IPR000048,InterPro:IPR001609,InterPro:IPR004009,InterPro:IPR008989,InterPro:IPR027417,InterPro:IPR036022,InterPro:IPR036961,MobiDBLite:mobidb-lite,PANTHER:PTHR13140,PANTHER:PTHR13140:SF685,PRINTS:PR00193,Pfam:PF00063,Pfam:PF00612,ProSiteProfiles:PS50096,ProSiteProfiles:PS51456,ProSiteProfiles:PS51844,SMART:SM00015,SMART:SM00242,SUPERFAMILY:SSF52540;Ontology_term=GO:0003774,GO:0003777,GO:0005515,GO:0005524,GO:0007018,GO:0008017,GO:0016459,GO:0051015
chr10_pilon_pilon	maker	exon	1650433	1651061	.	+	.	ID=vitri10g00950-mRNA-3:exon:437;Parent=vitri10g00950-mRNA-3
chr10_pilon_pilon	maker	five_prime_UTR	1650433	1651061	.	+	.	ID=vitri10g00950-mRNA-3:five_prime_utr;Parent=vitri10g00950-mRNA-3
chr10_pilon_pilon	maker	five_prime_UTR	1651172	1651536	.	+	.	ID=vitri10g00950-mRNA-3:five_prime_utr;Parent=vitri10g00950-mRNA-3
chr10_pilon_pilon	maker	exon	1651172	1651980	.	+	.	ID=vitri10g00950-mRNA-1:exon:412;Parent=vitri10g00950-mRNA-2,vitri10g00950-mRNA-1,vitri10g00950-mRNA-3
chr10_pilon_pilon	maker	CDS	1651537	1651980	.	+	0	ID=vitri10g00950-mRNA-3:cds;Parent=vitri10g00950-mRNA-3
chr10_pilon_pilon	maker	exon	1654791	1654892	.	+	.	ID=vitri10g00950-mRNA-1:exon:413;Parent=vitri10g00950-mRNA-2,vitri10g00950-mRNA-1,vitri10g00950-mRNA-3
chr10_pilon_pilon	maker	CDS	1654791	1654892	.	+	0	ID=vitri10g00950-mRNA-3:cds;Parent=vitri10g00950-mRNA-3
chr10_pilon_pilon	maker	exon	1654983	1655126	.	+	.	ID=vitri10g00950-mRNA-1:exon:414;Parent=vitri10g00950-mRNA-2,vitri10g00950-mRNA-1,vitri10g00950-mRNA-3
chr10_pilon_pilon	maker	CDS	1654983	1655126	.	+	0	ID=vitri10g00950-mRNA-3:cds;Parent=vitri10g00950-mRNA-3
chr10_pilon_pilon	maker	exon	1655233	1655383	.	+	.	ID=vitri10g00950-mRNA-1:exon:415;Parent=vitri10g00950-mRNA-2,vitri10g00950-mRNA-1,vitri10g00950-mRNA-3
chr10_pilon_pilon	maker	CDS	1655233	1655383	.	+	0	ID=vitri10g00950-mRNA-3:cds;Parent=vitri10g00950-mRNA-3
chr10_pilon_pilon	maker	exon	1655461	1655488	.	+	.	ID=vitri10g00950-mRNA-1:exon:416;Parent=vitri10g00950-mRNA-2,vitri10g00950-mRNA-1,vitri10g00950-mRNA-3
chr10_pilon_pilon	maker	CDS	1655461	1655488	.	+	2	ID=vitri10g00950-mRNA-3:cds;Parent=vitri10g00950-mRNA-3
chr10_pilon_pilon	maker	exon	1656909	1657074	.	+	.	ID=vitri10g00950-mRNA-1:exon:417;Parent=vitri10g00950-mRNA-2,vitri10g00950-mRNA-1,vitri10g00950-mRNA-3
chr10_pilon_pilon	maker	CDS	1656909	1657074	.	+	1	ID=vitri10g00950-mRNA-3:cds;Parent=vitri10g00950-mRNA-3
chr10_pilon_pilon	maker	exon	1657257	1657325	.	+	.	ID=vitri10g00950-mRNA-1:exon:418;Parent=vitri10g00950-mRNA-1,vitri10g00950-mRNA-3
chr10_pilon_pilon	maker	CDS	1657257	1657325	.	+	0	ID=vitri10g00950-mRNA-3:cds;Parent=vitri10g00950-mRNA-3
chr10_pilon_pilon	maker	exon	1658203	1658266	.	+	.	ID=vitri10g00950-mRNA-1:exon:419;Parent=vitri10g00950-mRNA-1,vitri10g00950-mRNA-3
chr10_pilon_pilon	maker	CDS	1658203	1658266	.	+	0	ID=vitri10g00950-mRNA-3:cds;Parent=vitri10g00950-mRNA-3
chr10_pilon_pilon	maker	exon	1659430	1659533	.	+	.	ID=vitri10g00950-mRNA-1:exon:420;Parent=vitri10g00950-mRNA-2,vitri10g00950-mRNA-1,vitri10g00950-mRNA-3
chr10_pilon_pilon	maker	CDS	1659430	1659533	.	+	2	ID=vitri10g00950-mRNA-3:cds;Parent=vitri10g00950-mRNA-3
chr10_pilon_pilon	maker	exon	1659654	1659792	.	+	.	ID=vitri10g00950-mRNA-1:exon:421;Parent=vitri10g00950-mRNA-2,vitri10g00950-mRNA-1,vitri10g00950-mRNA-3
chr10_pilon_pilon	maker	CDS	1659654	1659792	.	+	0	ID=vitri10g00950-mRNA-3:cds;Parent=vitri10g00950-mRNA-3
chr10_pilon_pilon	maker	exon	1662036	1662154	.	+	.	ID=vitri10g00950-mRNA-1:exon:422;Parent=vitri10g00950-mRNA-2,vitri10g00950-mRNA-1,vitri10g00950-mRNA-3
chr10_pilon_pilon	maker	CDS	1662036	1662154	.	+	2	ID=vitri10g00950-mRNA-3:cds;Parent=vitri10g00950-mRNA-3
chr10_pilon_pilon	maker	exon	1664647	1664799	.	+	.	ID=vitri10g00950-mRNA-1:exon:423;Parent=vitri10g00950-mRNA-2,vitri10g00950-mRNA-1,vitri10g00950-mRNA-3
chr10_pilon_pilon	maker	CDS	1664647	1664799	.	+	0	ID=vitri10g00950-mRNA-3:cds;Parent=vitri10g00950-mRNA-3
chr10_pilon_pilon	maker	exon	1664905	1664994	.	+	.	ID=vitri10g00950-mRNA-1:exon:424;Parent=vitri10g00950-mRNA-2,vitri10g00950-mRNA-1,vitri10g00950-mRNA-3
chr10_pilon_pilon	maker	CDS	1664905	1664994	.	+	0	ID=vitri10g00950-mRNA-3:cds;Parent=vitri10g00950-mRNA-3
chr10_pilon_pilon	maker	exon	1672196	1672273	.	+	.	ID=vitri10g00950-mRNA-1:exon:425;Parent=vitri10g00950-mRNA-2,vitri10g00950-mRNA-1,vitri10g00950-mRNA-3
chr10_pilon_pilon	maker	CDS	1672196	1672273	.	+	0	ID=vitri10g00950-mRNA-3:cds;Parent=vitri10g00950-mRNA-3
chr10_pilon_pilon	maker	exon	1673366	1673524	.	+	.	ID=vitri10g00950-mRNA-1:exon:426;Parent=vitri10g00950-mRNA-2,vitri10g00950-mRNA-1,vitri10g00950-mRNA-3
chr10_pilon_pilon	maker	CDS	1673366	1673524	.	+	0	ID=vitri10g00950-mRNA-3:cds;Parent=vitri10g00950-mRNA-3
chr10_pilon_pilon	maker	exon	1673955	1674161	.	+	.	ID=vitri10g00950-mRNA-1:exon:427;Parent=vitri10g00950-mRNA-2,vitri10g00950-mRNA-1,vitri10g00950-mRNA-3
chr10_pilon_pilon	maker	CDS	1673955	1674161	.	+	0	ID=vitri10g00950-mRNA-3:cds;Parent=vitri10g00950-mRNA-3
chr10_pilon_pilon	maker	exon	1675863	1676068	.	+	.	ID=vitri10g00950-mRNA-1:exon:428;Parent=vitri10g00950-mRNA-2,vitri10g00950-mRNA-1,vitri10g00950-mRNA-3
chr10_pilon_pilon	maker	CDS	1675863	1676068	.	+	0	ID=vitri10g00950-mRNA-3:cds;Parent=vitri10g00950-mRNA-3
chr10_pilon_pilon	maker	exon	1676191	1676326	.	+	.	ID=vitri10g00950-mRNA-1:exon:429;Parent=vitri10g00950-mRNA-2,vitri10g00950-mRNA-1,vitri10g00950-mRNA-3
chr10_pilon_pilon	maker	CDS	1676191	1676326	.	+	1	ID=vitri10g00950-mRNA-3:cds;Parent=vitri10g00950-mRNA-3
chr10_pilon_pilon	maker	exon	1676956	1677085	.	+	.	ID=vitri10g00950-mRNA-1:exon:430;Parent=vitri10g00950-mRNA-2,vitri10g00950-mRNA-1,vitri10g00950-mRNA-3
chr10_pilon_pilon	maker	CDS	1676956	1677085	.	+	0	ID=vitri10g00950-mRNA-3:cds;Parent=vitri10g00950-mRNA-3
chr10_pilon_pilon	maker	exon	1677190	1677336	.	+	.	ID=vitri10g00950-mRNA-1:exon:431;Parent=vitri10g00950-mRNA-2,vitri10g00950-mRNA-1,vitri10g00950-mRNA-3
chr10_pilon_pilon	maker	CDS	1677190	1677336	.	+	2	ID=vitri10g00950-mRNA-3:cds;Parent=vitri10g00950-mRNA-3
chr10_pilon_pilon	maker	exon	1677679	1677746	.	+	.	ID=vitri10g00950-mRNA-1:exon:432;Parent=vitri10g00950-mRNA-2,vitri10g00950-mRNA-1,vitri10g00950-mRNA-3
chr10_pilon_pilon	maker	CDS	1677679	1677746	.	+	2	ID=vitri10g00950-mRNA-3:cds;Parent=vitri10g00950-mRNA-3
chr10_pilon_pilon	maker	CDS	1678717	1679376	.	+	0	ID=vitri10g00950-mRNA-3:cds;Parent=vitri10g00950-mRNA-3
chr10_pilon_pilon	maker	exon	1678717	1679700	.	+	.	ID=vitri10g00950-mRNA-1:exon:433;Parent=vitri10g00950-mRNA-2,vitri10g00950-mRNA-1,vitri10g00950-mRNA-3
chr10_pilon_pilon	maker	three_prime_UTR	1679377	1679700	.	+	.	ID=vitri10g00950-mRNA-3:three_prime_utr;Parent=vitri10g00950-mRNA-3
###
chr10_pilon_pilon	maker	gene	1694359	1699203	.	+	.	ID=vitri10g00960;Name=vitri10g00960;Note=Similar to At5g66900: Probable disease resistance protein At5g66900 (Arabidopsis thaliana OX%3D3702);Dbxref=Gene3D:G3DSA:3.40.50.300,Gene3D:G3DSA:3.80.10.10,InterPro:IPR002182,InterPro:IPR008808,InterPro:IPR027417,InterPro:IPR032675,PANTHER:PTHR44056,PANTHER:PTHR44056:SF2,PRINTS:PR00364,Pfam:PF00931,Pfam:PF05659,ProSiteProfiles:PS51153,SUPERFAMILY:SSF52058,SUPERFAMILY:SSF52540;Ontology_term=GO:0043531
chr10_pilon_pilon	maker	mRNA	1694359	1699203	.	+	.	ID=vitri10g00960-mRNA-1;Parent=vitri10g00960;Name=vitri10g00960-mRNA-1;_AED=0.02;_eAED=0.02;_QI=352|1|0.6|1|1|1|5|0|821;Note=Similar to At5g66900: Probable disease resistance protein At5g66900 (Arabidopsis thaliana OX%3D3702);Dbxref=Gene3D:G3DSA:3.40.50.300,Gene3D:G3DSA:3.80.10.10,InterPro:IPR002182,InterPro:IPR008808,InterPro:IPR027417,InterPro:IPR032675,PANTHER:PTHR44056,PANTHER:PTHR44056:SF2,PRINTS:PR00364,Pfam:PF00931,Pfam:PF05659,ProSiteProfiles:PS51153,SUPERFAMILY:SSF52058,SUPERFAMILY:SSF52540;Ontology_term=GO:0043531
chr10_pilon_pilon	maker	five_prime_UTR	1694359	1694710	.	+	.	ID=vitri10g00960-mRNA-1:five_prime_utr;Parent=vitri10g00960-mRNA-1
chr10_pilon_pilon	maker	exon	1694359	1695374	.	+	.	ID=vitri10g00960-mRNA-1:exon:457;Parent=vitri10g00960-mRNA-1
chr10_pilon_pilon	maker	CDS	1694711	1695374	.	+	0	ID=vitri10g00960-mRNA-1:cds;Parent=vitri10g00960-mRNA-1
chr10_pilon_pilon	maker	exon	1696938	1697353	.	+	.	ID=vitri10g00960-mRNA-1:exon:458;Parent=vitri10g00960-mRNA-1
chr10_pilon_pilon	maker	CDS	1696938	1697353	.	+	2	ID=vitri10g00960-mRNA-1:cds;Parent=vitri10g00960-mRNA-1
chr10_pilon_pilon	maker	exon	1697443	1697801	.	+	.	ID=vitri10g00960-mRNA-1:exon:459;Parent=vitri10g00960-mRNA-1
chr10_pilon_pilon	maker	CDS	1697443	1697801	.	+	0	ID=vitri10g00960-mRNA-1:cds;Parent=vitri10g00960-mRNA-1
chr10_pilon_pilon	maker	exon	1698089	1698291	.	+	.	ID=vitri10g00960-mRNA-1:exon:460;Parent=vitri10g00960-mRNA-1
chr10_pilon_pilon	maker	CDS	1698089	1698291	.	+	1	ID=vitri10g00960-mRNA-1:cds;Parent=vitri10g00960-mRNA-1
chr10_pilon_pilon	maker	exon	1698380	1699203	.	+	.	ID=vitri10g00960-mRNA-1:exon:461;Parent=vitri10g00960-mRNA-1
chr10_pilon_pilon	maker	CDS	1698380	1699203	.	+	2	ID=vitri10g00960-mRNA-1:cds;Parent=vitri10g00960-mRNA-1
###
chr10_pilon_pilon	maker	gene	1701768	1704585	.	-	.	ID=vitri10g00970;Name=vitri10g00970;Note=Protein of unknown function
chr10_pilon_pilon	maker	mRNA	1701768	1704585	.	-	.	ID=vitri10g00970-mRNA-1;Parent=vitri10g00970;Name=vitri10g00970-mRNA-1;_AED=0.34;_eAED=0.49;_QI=0|0|0|1|0|0|3|0|125;Note=Protein of unknown function
chr10_pilon_pilon	maker	exon	1701768	1701854	.	-	.	ID=vitri10g00970-mRNA-1:exon:468;Parent=vitri10g00970-mRNA-1
chr10_pilon_pilon	maker	CDS	1701768	1701854	.	-	0	ID=vitri10g00970-mRNA-1:cds;Parent=vitri10g00970-mRNA-1
chr10_pilon_pilon	maker	exon	1702165	1702317	.	-	.	ID=vitri10g00970-mRNA-1:exon:469;Parent=vitri10g00970-mRNA-1
chr10_pilon_pilon	maker	CDS	1702165	1702317	.	-	0	ID=vitri10g00970-mRNA-1:cds;Parent=vitri10g00970-mRNA-1
chr10_pilon_pilon	maker	exon	1704451	1704585	.	-	.	ID=vitri10g00970-mRNA-1:exon:470;Parent=vitri10g00970-mRNA-1
chr10_pilon_pilon	maker	CDS	1704451	1704585	.	-	0	ID=vitri10g00970-mRNA-1:cds;Parent=vitri10g00970-mRNA-1
###
chr10_pilon_pilon	maker	gene	1705035	1705931	.	-	.	ID=vitri10g00980;Name=vitri10g00980;Note=Protein of unknown function
chr10_pilon_pilon	maker	mRNA	1705035	1705931	.	-	.	ID=vitri10g00980-mRNA-1;Parent=vitri10g00980;Name=vitri10g00980-mRNA-1;_AED=0.39;_eAED=0.56;_QI=7|0|0|1|0|0|3|0|123;Note=Protein of unknown function
chr10_pilon_pilon	maker	exon	1705035	1705203	.	-	.	ID=vitri10g00980-mRNA-1:exon:471;Parent=vitri10g00980-mRNA-1
chr10_pilon_pilon	maker	CDS	1705035	1705203	.	-	1	ID=vitri10g00980-mRNA-1:cds;Parent=vitri10g00980-mRNA-1
chr10_pilon_pilon	maker	exon	1705290	1705399	.	-	.	ID=vitri10g00980-mRNA-1:exon:472;Parent=vitri10g00980-mRNA-1
chr10_pilon_pilon	maker	CDS	1705290	1705399	.	-	0	ID=vitri10g00980-mRNA-1:cds;Parent=vitri10g00980-mRNA-1
chr10_pilon_pilon	maker	CDS	1705835	1705924	.	-	0	ID=vitri10g00980-mRNA-1:cds;Parent=vitri10g00980-mRNA-1
chr10_pilon_pilon	maker	exon	1705835	1705931	.	-	.	ID=vitri10g00980-mRNA-1:exon:473;Parent=vitri10g00980-mRNA-1
chr10_pilon_pilon	maker	five_prime_UTR	1705925	1705931	.	-	.	ID=vitri10g00980-mRNA-1:five_prime_utr;Parent=vitri10g00980-mRNA-1
###
chr10_pilon_pilon	maker	gene	1744401	1745112	.	+	.	ID=vitri10g00990;Name=vitri10g00990;Note=Protein of unknown function;Dbxref=MobiDBLite:mobidb-lite
chr10_pilon_pilon	maker	mRNA	1744401	1745112	.	+	.	ID=vitri10g00990-mRNA-1;Parent=vitri10g00990;Name=vitri10g00990-mRNA-1;_AED=0.35;_eAED=0.36;_QI=4|0|0|1|0|0|3|0|119;Note=Protein of unknown function;Dbxref=MobiDBLite:mobidb-lite
chr10_pilon_pilon	maker	five_prime_UTR	1744401	1744404	.	+	.	ID=vitri10g00990-mRNA-1:five_prime_utr;Parent=vitri10g00990-mRNA-1
chr10_pilon_pilon	maker	exon	1744401	1744605	.	+	.	ID=vitri10g00990-mRNA-1:exon:474;Parent=vitri10g00990-mRNA-1
chr10_pilon_pilon	maker	CDS	1744405	1744605	.	+	0	ID=vitri10g00990-mRNA-1:cds;Parent=vitri10g00990-mRNA-1
chr10_pilon_pilon	maker	exon	1744826	1744897	.	+	.	ID=vitri10g00990-mRNA-1:exon:475;Parent=vitri10g00990-mRNA-1
chr10_pilon_pilon	maker	CDS	1744826	1744897	.	+	0	ID=vitri10g00990-mRNA-1:cds;Parent=vitri10g00990-mRNA-1
chr10_pilon_pilon	maker	exon	1745029	1745112	.	+	.	ID=vitri10g00990-mRNA-1:exon:476;Parent=vitri10g00990-mRNA-1
chr10_pilon_pilon	maker	CDS	1745029	1745112	.	+	0	ID=vitri10g00990-mRNA-1:cds;Parent=vitri10g00990-mRNA-1
###
chr10_pilon_pilon	maker	gene	1745341	1745785	.	+	.	ID=vitri10g01000;Name=vitri10g01000;Note=Protein of unknown function
chr10_pilon_pilon	maker	mRNA	1745341	1745785	.	+	.	ID=vitri10g01000-mRNA-1;Parent=vitri10g01000;Name=vitri10g01000-mRNA-1;_AED=0.45;_eAED=0.74;_QI=0|0|0|0.66|0|0|3|0|69;Note=Protein of unknown function
chr10_pilon_pilon	maker	exon	1745341	1745432	.	+	.	ID=vitri10g01000-mRNA-1:exon:477;Parent=vitri10g01000-mRNA-1
chr10_pilon_pilon	maker	CDS	1745341	1745432	.	+	0	ID=vitri10g01000-mRNA-1:cds;Parent=vitri10g01000-mRNA-1
chr10_pilon_pilon	maker	exon	1745488	1745591	.	+	.	ID=vitri10g01000-mRNA-1:exon:478;Parent=vitri10g01000-mRNA-1
chr10_pilon_pilon	maker	CDS	1745488	1745591	.	+	1	ID=vitri10g01000-mRNA-1:cds;Parent=vitri10g01000-mRNA-1
chr10_pilon_pilon	maker	exon	1745772	1745785	.	+	.	ID=vitri10g01000-mRNA-1:exon:479;Parent=vitri10g01000-mRNA-1
chr10_pilon_pilon	maker	CDS	1745772	1745785	.	+	2	ID=vitri10g01000-mRNA-1:cds;Parent=vitri10g01000-mRNA-1
###
chr10_pilon_pilon	maker	gene	1751553	1759529	.	+	.	ID=vitri10g01010;Name=vitri10g01010;Note=Similar to At5g66890: Probable disease resistance protein At5g66890 (Arabidopsis thaliana OX%3D3702);Dbxref=Coils:Coil,Gene3D:G3DSA:3.40.50.300,Gene3D:G3DSA:3.80.10.10,InterPro:IPR002182,InterPro:IPR008808,InterPro:IPR027417,InterPro:IPR032675,PANTHER:PTHR44056,PANTHER:PTHR44056:SF2,PRINTS:PR00364,Pfam:PF00931,Pfam:PF05659,ProSiteProfiles:PS51153,SUPERFAMILY:SSF52047,SUPERFAMILY:SSF52540;Ontology_term=GO:0043531
chr10_pilon_pilon	maker	mRNA	1751553	1759529	.	+	.	ID=vitri10g01010-mRNA-1;Parent=vitri10g01010;Name=vitri10g01010-mRNA-1;_AED=0.04;_eAED=0.04;_QI=115|0.6|0.33|1|0.8|0.66|6|0|864;Note=Similar to At5g66890: Probable disease resistance protein At5g66890 (Arabidopsis thaliana OX%3D3702);Dbxref=Coils:Coil,Gene3D:G3DSA:3.40.50.300,Gene3D:G3DSA:3.80.10.10,InterPro:IPR002182,InterPro:IPR008808,InterPro:IPR027417,InterPro:IPR032675,PANTHER:PTHR44056,PANTHER:PTHR44056:SF2,PRINTS:PR00364,Pfam:PF00931,Pfam:PF05659,ProSiteProfiles:PS51153,SUPERFAMILY:SSF52047,SUPERFAMILY:SSF52540;Ontology_term=GO:0043531
chr10_pilon_pilon	maker	five_prime_UTR	1751553	1751667	.	+	.	ID=vitri10g01010-mRNA-1:five_prime_utr;Parent=vitri10g01010-mRNA-1
chr10_pilon_pilon	maker	exon	1751553	1752283	.	+	.	ID=vitri10g01010-mRNA-1:exon:462;Parent=vitri10g01010-mRNA-1
chr10_pilon_pilon	maker	CDS	1751668	1752283	.	+	0	ID=vitri10g01010-mRNA-1:cds;Parent=vitri10g01010-mRNA-1
chr10_pilon_pilon	maker	exon	1752563	1752996	.	+	.	ID=vitri10g01010-mRNA-1:exon:463;Parent=vitri10g01010-mRNA-1
chr10_pilon_pilon	maker	CDS	1752563	1752996	.	+	2	ID=vitri10g01010-mRNA-1:cds;Parent=vitri10g01010-mRNA-1
chr10_pilon_pilon	maker	exon	1753088	1753443	.	+	.	ID=vitri10g01010-mRNA-1:exon:464;Parent=vitri10g01010-mRNA-1
chr10_pilon_pilon	maker	CDS	1753088	1753443	.	+	0	ID=vitri10g01010-mRNA-1:cds;Parent=vitri10g01010-mRNA-1
chr10_pilon_pilon	maker	exon	1753681	1753892	.	+	.	ID=vitri10g01010-mRNA-1:exon:465;Parent=vitri10g01010-mRNA-1
chr10_pilon_pilon	maker	CDS	1753681	1753892	.	+	1	ID=vitri10g01010-mRNA-1:cds;Parent=vitri10g01010-mRNA-1
chr10_pilon_pilon	maker	exon	1753981	1754792	.	+	.	ID=vitri10g01010-mRNA-1:exon:466;Parent=vitri10g01010-mRNA-1
chr10_pilon_pilon	maker	CDS	1753981	1754792	.	+	2	ID=vitri10g01010-mRNA-1:cds;Parent=vitri10g01010-mRNA-1
chr10_pilon_pilon	maker	exon	1759368	1759529	.	+	.	ID=vitri10g01010-mRNA-1:exon:467;Parent=vitri10g01010-mRNA-1
chr10_pilon_pilon	maker	CDS	1759368	1759529	.	+	0	ID=vitri10g01010-mRNA-1:cds;Parent=vitri10g01010-mRNA-1
###
chr10_pilon_pilon	maker	gene	1790166	1790982	.	+	.	ID=vitri10g01020;Name=vitri10g01020;Note=Protein of unknown function
chr10_pilon_pilon	maker	mRNA	1790166	1790982	.	+	.	ID=vitri10g01020-mRNA-1;Parent=vitri10g01020;Name=vitri10g01020-mRNA-1;_AED=0.21;_eAED=0.60;_QI=0|0|0|1|0|0|2|0|71;Note=Protein of unknown function
chr10_pilon_pilon	maker	exon	1790166	1790269	.	+	.	ID=vitri10g01020-mRNA-1:exon:508;Parent=vitri10g01020-mRNA-1
chr10_pilon_pilon	maker	CDS	1790166	1790269	.	+	0	ID=vitri10g01020-mRNA-1:cds;Parent=vitri10g01020-mRNA-1
chr10_pilon_pilon	maker	exon	1790874	1790982	.	+	.	ID=vitri10g01020-mRNA-1:exon:509;Parent=vitri10g01020-mRNA-1
chr10_pilon_pilon	maker	CDS	1790874	1790982	.	+	1	ID=vitri10g01020-mRNA-1:cds;Parent=vitri10g01020-mRNA-1
###
chr10_pilon_pilon	maker	gene	1795253	1798351	.	+	.	ID=vitri10g01030;Name=vitri10g01030;Note=Protein of unknown function;Dbxref=Gene3D:G3DSA:3.40.50.300,Gene3D:G3DSA:3.80.10.10,InterPro:IPR002182,InterPro:IPR027417,InterPro:IPR032675,PANTHER:PTHR44056,PANTHER:PTHR44056:SF2,Pfam:PF00931,SUPERFAMILY:SSF52058,SUPERFAMILY:SSF52540;Ontology_term=GO:0043531
chr10_pilon_pilon	maker	mRNA	1795253	1798351	.	+	.	ID=vitri10g01030-mRNA-1;Parent=vitri10g01030;Name=vitri10g01030-mRNA-1;_AED=0.30;_eAED=0.31;_QI=0|0.33|0.14|0.85|1|1|7|0|472;Note=Protein of unknown function;Dbxref=Gene3D:G3DSA:3.40.50.300,Gene3D:G3DSA:3.80.10.10,InterPro:IPR002182,InterPro:IPR027417,InterPro:IPR032675,PANTHER:PTHR44056,PANTHER:PTHR44056:SF2,Pfam:PF00931,SUPERFAMILY:SSF52058,SUPERFAMILY:SSF52540;Ontology_term=GO:0043531
chr10_pilon_pilon	maker	exon	1795253	1795311	.	+	.	ID=vitri10g01030-mRNA-1:exon:493;Parent=vitri10g01030-mRNA-1
chr10_pilon_pilon	maker	CDS	1795253	1795311	.	+	0	ID=vitri10g01030-mRNA-1:cds;Parent=vitri10g01030-mRNA-1
chr10_pilon_pilon	maker	exon	1795951	1796114	.	+	.	ID=vitri10g01030-mRNA-1:exon:494;Parent=vitri10g01030-mRNA-1
chr10_pilon_pilon	maker	CDS	1795951	1796114	.	+	1	ID=vitri10g01030-mRNA-1:cds;Parent=vitri10g01030-mRNA-1
chr10_pilon_pilon	maker	exon	1796604	1796872	.	+	.	ID=vitri10g01030-mRNA-1:exon:495;Parent=vitri10g01030-mRNA-1
chr10_pilon_pilon	maker	CDS	1796604	1796872	.	+	2	ID=vitri10g01030-mRNA-1:cds;Parent=vitri10g01030-mRNA-1
chr10_pilon_pilon	maker	exon	1797034	1797311	.	+	.	ID=vitri10g01030-mRNA-1:exon:496;Parent=vitri10g01030-mRNA-1
chr10_pilon_pilon	maker	CDS	1797034	1797311	.	+	0	ID=vitri10g01030-mRNA-1:cds;Parent=vitri10g01030-mRNA-1
chr10_pilon_pilon	maker	exon	1797543	1797754	.	+	.	ID=vitri10g01030-mRNA-1:exon:497;Parent=vitri10g01030-mRNA-1
chr10_pilon_pilon	maker	CDS	1797543	1797754	.	+	1	ID=vitri10g01030-mRNA-1:cds;Parent=vitri10g01030-mRNA-1
chr10_pilon_pilon	maker	exon	1797841	1797968	.	+	.	ID=vitri10g01030-mRNA-1:exon:498;Parent=vitri10g01030-mRNA-1
chr10_pilon_pilon	maker	CDS	1797841	1797968	.	+	2	ID=vitri10g01030-mRNA-1:cds;Parent=vitri10g01030-mRNA-1
chr10_pilon_pilon	maker	exon	1798043	1798351	.	+	.	ID=vitri10g01030-mRNA-1:exon:499;Parent=vitri10g01030-mRNA-1
chr10_pilon_pilon	maker	CDS	1798043	1798351	.	+	0	ID=vitri10g01030-mRNA-1:cds;Parent=vitri10g01030-mRNA-1
###
chr10_pilon_pilon	maker	gene	1798459	1803287	.	+	.	ID=vitri10g01040;Name=vitri10g01040;Note=Protein of unknown function;Dbxref=PANTHER:PTHR44056,PANTHER:PTHR44056:SF2
chr10_pilon_pilon	maker	mRNA	1798459	1803287	.	+	.	ID=vitri10g01040-mRNA-1;Parent=vitri10g01040;Name=vitri10g01040-mRNA-1;_AED=0.47;_eAED=0.60;_QI=0|0|0|1|0|0|2|0|82;Note=Protein of unknown function;Dbxref=PANTHER:PTHR44056,PANTHER:PTHR44056:SF2
chr10_pilon_pilon	maker	exon	1798459	1798644	.	+	.	ID=vitri10g01040-mRNA-1:exon:506;Parent=vitri10g01040-mRNA-1
chr10_pilon_pilon	maker	CDS	1798459	1798644	.	+	0	ID=vitri10g01040-mRNA-1:cds;Parent=vitri10g01040-mRNA-1
chr10_pilon_pilon	maker	exon	1803225	1803287	.	+	.	ID=vitri10g01040-mRNA-1:exon:507;Parent=vitri10g01040-mRNA-1
chr10_pilon_pilon	maker	CDS	1803225	1803287	.	+	0	ID=vitri10g01040-mRNA-1:cds;Parent=vitri10g01040-mRNA-1
###
chr10_pilon_pilon	maker	gene	1840082	1840634	.	+	.	ID=vitri10g01050;Name=vitri10g01050;Note=Protein of unknown function
chr10_pilon_pilon	maker	mRNA	1840082	1840634	.	+	.	ID=vitri10g01050-mRNA-1;Parent=vitri10g01050;Name=vitri10g01050-mRNA-1;_AED=0.44;_eAED=0.67;_QI=0|0|0|0.66|0|0|3|0|94;Note=Protein of unknown function
chr10_pilon_pilon	maker	exon	1840082	1840238	.	+	.	ID=vitri10g01050-mRNA-1:exon:503;Parent=vitri10g01050-mRNA-1
chr10_pilon_pilon	maker	CDS	1840082	1840238	.	+	0	ID=vitri10g01050-mRNA-1:cds;Parent=vitri10g01050-mRNA-1
chr10_pilon_pilon	maker	exon	1840345	1840458	.	+	.	ID=vitri10g01050-mRNA-1:exon:504;Parent=vitri10g01050-mRNA-1
chr10_pilon_pilon	maker	CDS	1840345	1840458	.	+	2	ID=vitri10g01050-mRNA-1:cds;Parent=vitri10g01050-mRNA-1
chr10_pilon_pilon	maker	exon	1840621	1840634	.	+	.	ID=vitri10g01050-mRNA-1:exon:505;Parent=vitri10g01050-mRNA-1
chr10_pilon_pilon	maker	CDS	1840621	1840634	.	+	2	ID=vitri10g01050-mRNA-1:cds;Parent=vitri10g01050-mRNA-1
###
chr10_pilon_pilon	maker	gene	1841010	1841894	.	+	.	ID=vitri10g01060;Name=vitri10g01060;Note=Protein of unknown function
chr10_pilon_pilon	maker	mRNA	1841010	1841894	.	+	.	ID=vitri10g01060-mRNA-1;Parent=vitri10g01060;Name=vitri10g01060-mRNA-1;_AED=0.19;_eAED=0.19;_QI=0|0|0|1|0|0|3|0|122;Note=Protein of unknown function
chr10_pilon_pilon	maker	exon	1841010	1841151	.	+	.	ID=vitri10g01060-mRNA-1:exon:500;Parent=vitri10g01060-mRNA-1
chr10_pilon_pilon	maker	CDS	1841010	1841151	.	+	0	ID=vitri10g01060-mRNA-1:cds;Parent=vitri10g01060-mRNA-1
chr10_pilon_pilon	maker	exon	1841579	1841641	.	+	.	ID=vitri10g01060-mRNA-1:exon:501;Parent=vitri10g01060-mRNA-1
chr10_pilon_pilon	maker	CDS	1841579	1841641	.	+	2	ID=vitri10g01060-mRNA-1:cds;Parent=vitri10g01060-mRNA-1
chr10_pilon_pilon	maker	exon	1841731	1841894	.	+	.	ID=vitri10g01060-mRNA-1:exon:502;Parent=vitri10g01060-mRNA-1
chr10_pilon_pilon	maker	CDS	1841731	1841894	.	+	2	ID=vitri10g01060-mRNA-1:cds;Parent=vitri10g01060-mRNA-1
###
chr10_pilon_pilon	maker	gene	1846164	1852480	.	+	.	ID=vitri10g01070;Name=vitri10g01070;Note=Similar to At5g66900: Probable disease resistance protein At5g66900 (Arabidopsis thaliana OX%3D3702);Dbxref=Gene3D:G3DSA:3.40.50.300,Gene3D:G3DSA:3.80.10.10,InterPro:IPR002182,InterPro:IPR008808,InterPro:IPR027417,InterPro:IPR032675,PANTHER:PTHR44056,PANTHER:PTHR44056:SF2,PRINTS:PR00364,Pfam:PF00931,Pfam:PF05659,SUPERFAMILY:SSF52047,SUPERFAMILY:SSF52540;Ontology_term=GO:0043531
chr10_pilon_pilon	maker	mRNA	1846164	1852480	.	+	.	ID=vitri10g01070-mRNA-1;Parent=vitri10g01070;Name=vitri10g01070-mRNA-1;_AED=0.06;_eAED=0.06;_QI=115|0.6|0.33|1|0.8|0.66|6|0|870;Note=Similar to At5g66900: Probable disease resistance protein At5g66900 (Arabidopsis thaliana OX%3D3702);Dbxref=Gene3D:G3DSA:3.40.50.300,Gene3D:G3DSA:3.80.10.10,InterPro:IPR002182,InterPro:IPR008808,InterPro:IPR027417,InterPro:IPR032675,PANTHER:PTHR44056,PANTHER:PTHR44056:SF2,PRINTS:PR00364,Pfam:PF00931,Pfam:PF05659,SUPERFAMILY:SSF52047,SUPERFAMILY:SSF52540;Ontology_term=GO:0043531
chr10_pilon_pilon	maker	five_prime_UTR	1846164	1846278	.	+	.	ID=vitri10g01070-mRNA-1:five_prime_utr;Parent=vitri10g01070-mRNA-1
chr10_pilon_pilon	maker	exon	1846164	1846894	.	+	.	ID=vitri10g01070-mRNA-1:exon:487;Parent=vitri10g01070-mRNA-1
chr10_pilon_pilon	maker	CDS	1846279	1846894	.	+	0	ID=vitri10g01070-mRNA-1:cds;Parent=vitri10g01070-mRNA-1
chr10_pilon_pilon	maker	exon	1847534	1847970	.	+	.	ID=vitri10g01070-mRNA-1:exon:488;Parent=vitri10g01070-mRNA-1
chr10_pilon_pilon	maker	CDS	1847534	1847970	.	+	2	ID=vitri10g01070-mRNA-1:cds;Parent=vitri10g01070-mRNA-1
chr10_pilon_pilon	maker	exon	1848064	1848434	.	+	.	ID=vitri10g01070-mRNA-1:exon:489;Parent=vitri10g01070-mRNA-1
chr10_pilon_pilon	maker	CDS	1848064	1848434	.	+	0	ID=vitri10g01070-mRNA-1:cds;Parent=vitri10g01070-mRNA-1
chr10_pilon_pilon	maker	exon	1848655	1848866	.	+	.	ID=vitri10g01070-mRNA-1:exon:490;Parent=vitri10g01070-mRNA-1
chr10_pilon_pilon	maker	CDS	1848655	1848866	.	+	1	ID=vitri10g01070-mRNA-1:cds;Parent=vitri10g01070-mRNA-1
chr10_pilon_pilon	maker	exon	1848955	1849766	.	+	.	ID=vitri10g01070-mRNA-1:exon:491;Parent=vitri10g01070-mRNA-1
chr10_pilon_pilon	maker	CDS	1848955	1849766	.	+	2	ID=vitri10g01070-mRNA-1:cds;Parent=vitri10g01070-mRNA-1
chr10_pilon_pilon	maker	exon	1852319	1852480	.	+	.	ID=vitri10g01070-mRNA-1:exon:492;Parent=vitri10g01070-mRNA-1
chr10_pilon_pilon	maker	CDS	1852319	1852480	.	+	0	ID=vitri10g01070-mRNA-1:cds;Parent=vitri10g01070-mRNA-1
###
chr10_pilon_pilon	maker	gene	1910998	1911805	.	+	.	ID=vitri10g01080;Name=vitri10g01080;Note=Protein of unknown function
chr10_pilon_pilon	maker	mRNA	1910998	1911805	.	+	.	ID=vitri10g01080-mRNA-1;Parent=vitri10g01080;Name=vitri10g01080-mRNA-1;_AED=0.00;_eAED=0.00;_QI=0|1|0.5|1|1|0.5|2|60|210;Note=Protein of unknown function
chr10_pilon_pilon	maker	exon	1910998	1911071	.	+	.	ID=vitri10g01080-mRNA-1:exon:321;Parent=vitri10g01080-mRNA-1
chr10_pilon_pilon	maker	CDS	1910998	1911071	.	+	0	ID=vitri10g01080-mRNA-1:cds;Parent=vitri10g01080-mRNA-1
chr10_pilon_pilon	maker	CDS	1911187	1911745	.	+	1	ID=vitri10g01080-mRNA-1:cds;Parent=vitri10g01080-mRNA-1
chr10_pilon_pilon	maker	exon	1911187	1911805	.	+	.	ID=vitri10g01080-mRNA-1:exon:322;Parent=vitri10g01080-mRNA-1
chr10_pilon_pilon	maker	three_prime_UTR	1911746	1911805	.	+	.	ID=vitri10g01080-mRNA-1:three_prime_utr;Parent=vitri10g01080-mRNA-1
###
chr10_pilon_pilon	maker	gene	1979207	1979566	.	-	.	ID=vitri10g01090;Name=vitri10g01090;Note=Similar to SUS2: Sucrose synthase 2 (Arabidopsis thaliana OX%3D3702);Dbxref=Gene3D:G3DSA:3.40.50.2000,InterPro:IPR000368,PANTHER:PTHR12526,PANTHER:PTHR12526:SF509,Pfam:PF00862,SUPERFAMILY:SSF53756;Ontology_term=GO:0005985,GO:0016157
chr10_pilon_pilon	maker	mRNA	1979207	1979566	.	-	.	ID=vitri10g01090-mRNA-1;Parent=vitri10g01090;Name=vitri10g01090-mRNA-1;_AED=0.32;_eAED=0.32;_QI=0|-1|0|1|-1|1|1|0|119;Note=Similar to SUS2: Sucrose synthase 2 (Arabidopsis thaliana OX%3D3702);Dbxref=Gene3D:G3DSA:3.40.50.2000,InterPro:IPR000368,PANTHER:PTHR12526,PANTHER:PTHR12526:SF509,Pfam:PF00862,SUPERFAMILY:SSF53756;Ontology_term=GO:0005985,GO:0016157
chr10_pilon_pilon	maker	exon	1979207	1979566	.	-	.	ID=vitri10g01090-mRNA-1:exon:325;Parent=vitri10g01090-mRNA-1
chr10_pilon_pilon	maker	CDS	1979207	1979566	.	-	0	ID=vitri10g01090-mRNA-1:cds;Parent=vitri10g01090-mRNA-1
###
chr10_pilon_pilon	maker	gene	1979594	1980511	.	-	.	ID=vitri10g01100;Name=vitri10g01100;Note=Similar to SLY1: SEC1 family transport protein SLY1 (Arabidopsis thaliana OX%3D3702);Dbxref=Gene3D:G3DSA:3.40.50.2000,InterPro:IPR000368,PANTHER:PTHR12526,PANTHER:PTHR12526:SF509,Pfam:PF00862;Ontology_term=GO:0005985,GO:0016157
chr10_pilon_pilon	maker	mRNA	1979594	1980511	.	-	.	ID=vitri10g01100-mRNA-1;Parent=vitri10g01100;Name=vitri10g01100-mRNA-1;_AED=0.24;_eAED=0.24;_QI=0|0|0|1|0|0|4|0|187;Note=Similar to SLY1: SEC1 family transport protein SLY1 (Arabidopsis thaliana OX%3D3702);Dbxref=Gene3D:G3DSA:3.40.50.2000,InterPro:IPR000368,PANTHER:PTHR12526,PANTHER:PTHR12526:SF509,Pfam:PF00862;Ontology_term=GO:0005985,GO:0016157
chr10_pilon_pilon	maker	exon	1979594	1979819	.	-	.	ID=vitri10g01100-mRNA-1:exon:326;Parent=vitri10g01100-mRNA-1
chr10_pilon_pilon	maker	CDS	1979594	1979819	.	-	1	ID=vitri10g01100-mRNA-1:cds;Parent=vitri10g01100-mRNA-1
chr10_pilon_pilon	maker	exon	1979837	1979918	.	-	.	ID=vitri10g01100-mRNA-1:exon:327;Parent=vitri10g01100-mRNA-1
chr10_pilon_pilon	maker	CDS	1979837	1979918	.	-	2	ID=vitri10g01100-mRNA-1:cds;Parent=vitri10g01100-mRNA-1
chr10_pilon_pilon	maker	exon	1980103	1980226	.	-	.	ID=vitri10g01100-mRNA-1:exon:328;Parent=vitri10g01100-mRNA-1
chr10_pilon_pilon	maker	CDS	1980103	1980226	.	-	0	ID=vitri10g01100-mRNA-1:cds;Parent=vitri10g01100-mRNA-1
chr10_pilon_pilon	maker	exon	1980380	1980511	.	-	.	ID=vitri10g01100-mRNA-1:exon:329;Parent=vitri10g01100-mRNA-1
chr10_pilon_pilon	maker	CDS	1980380	1980511	.	-	0	ID=vitri10g01100-mRNA-1:cds;Parent=vitri10g01100-mRNA-1
###
chr10_pilon_pilon	maker	gene	1992429	1993769	.	-	.	ID=vitri10g01110;Name=vitri10g01110;Note=Similar to SUS2: Sucrose synthase 2 (Arabidopsis thaliana OX%3D3702);Dbxref=Gene3D:G3DSA:3.40.50.2000,InterPro:IPR000368,PANTHER:PTHR12526,PANTHER:PTHR12526:SF509,Pfam:PF00862,SUPERFAMILY:SSF53756,SignalP_EUK:SignalP-noTM;Ontology_term=GO:0005985,GO:0016157
chr10_pilon_pilon	maker	mRNA	1992429	1993769	.	-	.	ID=vitri10g01110-mRNA-1;Parent=vitri10g01110;Name=vitri10g01110-mRNA-1;_AED=0.21;_eAED=0.21;_QI=0|0|0|1|0.66|0.5|4|0|237;Note=Similar to SUS2: Sucrose synthase 2 (Arabidopsis thaliana OX%3D3702);Dbxref=Gene3D:G3DSA:3.40.50.2000,InterPro:IPR000368,PANTHER:PTHR12526,PANTHER:PTHR12526:SF509,Pfam:PF00862,SUPERFAMILY:SSF53756,SignalP_EUK:SignalP-noTM;Ontology_term=GO:0005985,GO:0016157
chr10_pilon_pilon	maker	exon	1992429	1992811	.	-	.	ID=vitri10g01110-mRNA-1:exon:340;Parent=vitri10g01110-mRNA-1
chr10_pilon_pilon	maker	CDS	1992429	1992811	.	-	2	ID=vitri10g01110-mRNA-1:cds;Parent=vitri10g01110-mRNA-1
chr10_pilon_pilon	maker	exon	1993103	1993219	.	-	.	ID=vitri10g01110-mRNA-1:exon:341;Parent=vitri10g01110-mRNA-1
chr10_pilon_pilon	maker	CDS	1993103	1993219	.	-	2	ID=vitri10g01110-mRNA-1:cds;Parent=vitri10g01110-mRNA-1
chr10_pilon_pilon	maker	exon	1993403	1993526	.	-	.	ID=vitri10g01110-mRNA-1:exon:342;Parent=vitri10g01110-mRNA-1
chr10_pilon_pilon	maker	CDS	1993403	1993526	.	-	0	ID=vitri10g01110-mRNA-1:cds;Parent=vitri10g01110-mRNA-1
chr10_pilon_pilon	maker	exon	1993680	1993769	.	-	.	ID=vitri10g01110-mRNA-1:exon:343;Parent=vitri10g01110-mRNA-1
chr10_pilon_pilon	maker	CDS	1993680	1993769	.	-	0	ID=vitri10g01110-mRNA-1:cds;Parent=vitri10g01110-mRNA-1
###
chr10_pilon_pilon	maker	gene	2063481	2081755	.	+	.	ID=vitri10g01120;Name=vitri10g01120;Note=Protein of unknown function;Dbxref=Gene3D:G3DSA:2.120.10.30,InterPro:IPR004141,InterPro:IPR011042,InterPro:IPR018119,PANTHER:PTHR10426,PANTHER:PTHR10426:SF33,Pfam:PF03088,SUPERFAMILY:SSF63829;Ontology_term=GO:0009058,GO:0016844
chr10_pilon_pilon	maker	mRNA	2063481	2071177	.	+	.	ID=vitri10g01120-mRNA-1;Parent=vitri10g01120;Name=vitri10g01120-mRNA-1;_AED=0.40;_eAED=0.44;_QI=0|0|0|1|0|0|3|0|168;Note=Protein of unknown function;Dbxref=Gene3D:G3DSA:2.120.10.30,InterPro:IPR004141,InterPro:IPR011042,PANTHER:PTHR10426,PANTHER:PTHR10426:SF33,SUPERFAMILY:SSF63829;Ontology_term=GO:0009058,GO:0016844
chr10_pilon_pilon	maker	exon	2063481	2063651	.	+	.	ID=vitri10g01120-mRNA-1:exon:344;Parent=vitri10g01120-mRNA-1
chr10_pilon_pilon	maker	CDS	2063481	2063651	.	+	0	ID=vitri10g01120-mRNA-1:cds;Parent=vitri10g01120-mRNA-1
chr10_pilon_pilon	maker	exon	2070796	2071092	.	+	.	ID=vitri10g01120-mRNA-1:exon:345;Parent=vitri10g01120-mRNA-1
chr10_pilon_pilon	maker	CDS	2070796	2071092	.	+	0	ID=vitri10g01120-mRNA-1:cds;Parent=vitri10g01120-mRNA-1
chr10_pilon_pilon	maker	exon	2071139	2071177	.	+	.	ID=vitri10g01120-mRNA-1:exon:346;Parent=vitri10g01120-mRNA-1
chr10_pilon_pilon	maker	CDS	2071139	2071177	.	+	0	ID=vitri10g01120-mRNA-1:cds;Parent=vitri10g01120-mRNA-1
chr10_pilon_pilon	maker	mRNA	2071180	2081755	.	+	.	ID=vitri10g01120-mRNA-2;Parent=vitri10g01120;Name=vitri10g01120-mRNA-2;_AED=0.36;_eAED=0.44;_QI=0|0|0|1|0|0|2|0|219;Note=Protein of unknown function;Dbxref=Gene3D:G3DSA:2.120.10.30,InterPro:IPR004141,InterPro:IPR011042,InterPro:IPR018119,PANTHER:PTHR10426,PANTHER:PTHR10426:SF33,Pfam:PF03088,SUPERFAMILY:SSF63829;Ontology_term=GO:0009058,GO:0016844
chr10_pilon_pilon	maker	exon	2071180	2071274	.	+	.	ID=vitri10g01120-mRNA-2:exon:347;Parent=vitri10g01120-mRNA-2
chr10_pilon_pilon	maker	CDS	2071180	2071274	.	+	0	ID=vitri10g01120-mRNA-2:cds;Parent=vitri10g01120-mRNA-2
chr10_pilon_pilon	maker	exon	2081191	2081755	.	+	.	ID=vitri10g01120-mRNA-2:exon:348;Parent=vitri10g01120-mRNA-2
chr10_pilon_pilon	maker	CDS	2081191	2081755	.	+	1	ID=vitri10g01120-mRNA-2:cds;Parent=vitri10g01120-mRNA-2
###
chr10_pilon_pilon	maker	gene	2100356	2101096	.	+	.	ID=vitri10g01130;Name=vitri10g01130;Note=Protein of unknown function;Dbxref=Gene3D:G3DSA:2.120.10.30,InterPro:IPR004141,InterPro:IPR011042,PANTHER:PTHR10426,PANTHER:PTHR10426:SF33,SignalP_EUK:SignalP-noTM;Ontology_term=GO:0009058,GO:0016844
chr10_pilon_pilon	maker	mRNA	2100356	2101096	.	+	.	ID=vitri10g01130-mRNA-1;Parent=vitri10g01130;Name=vitri10g01130-mRNA-1;_AED=0.32;_eAED=0.38;_QI=0|0|0|1|0|0|2|0|138;Note=Protein of unknown function;Dbxref=Gene3D:G3DSA:2.120.10.30,InterPro:IPR004141,InterPro:IPR011042,PANTHER:PTHR10426,PANTHER:PTHR10426:SF33,SignalP_EUK:SignalP-noTM;Ontology_term=GO:0009058,GO:0016844
chr10_pilon_pilon	maker	exon	2100356	2100597	.	+	.	ID=vitri10g01130-mRNA-1:exon:537;Parent=vitri10g01130-mRNA-1
chr10_pilon_pilon	maker	CDS	2100356	2100597	.	+	0	ID=vitri10g01130-mRNA-1:cds;Parent=vitri10g01130-mRNA-1
chr10_pilon_pilon	maker	exon	2100922	2101096	.	+	.	ID=vitri10g01130-mRNA-1:exon:538;Parent=vitri10g01130-mRNA-1
chr10_pilon_pilon	maker	CDS	2100922	2101096	.	+	1	ID=vitri10g01130-mRNA-1:cds;Parent=vitri10g01130-mRNA-1
###
chr10_pilon_pilon	maker	gene	2101293	2101720	.	+	.	ID=vitri10g01140;Name=vitri10g01140;Note=Protein of unknown function;Dbxref=Gene3D:G3DSA:2.120.10.30,InterPro:IPR004141,InterPro:IPR011042,InterPro:IPR018119,PANTHER:PTHR10426,PANTHER:PTHR10426:SF33,Pfam:PF03088,SUPERFAMILY:SSF63829;Ontology_term=GO:0009058,GO:0016844
chr10_pilon_pilon	maker	mRNA	2101293	2101720	.	+	.	ID=vitri10g01140-mRNA-1;Parent=vitri10g01140;Name=vitri10g01140-mRNA-1;_AED=0.33;_eAED=0.34;_QI=0|0|0|1|0|0|2|0|140;Note=Protein of unknown function;Dbxref=Gene3D:G3DSA:2.120.10.30,InterPro:IPR004141,InterPro:IPR011042,InterPro:IPR018119,PANTHER:PTHR10426,PANTHER:PTHR10426:SF33,Pfam:PF03088,SUPERFAMILY:SSF63829;Ontology_term=GO:0009058,GO:0016844
chr10_pilon_pilon	maker	exon	2101293	2101627	.	+	.	ID=vitri10g01140-mRNA-1:exon:535;Parent=vitri10g01140-mRNA-1
chr10_pilon_pilon	maker	CDS	2101293	2101627	.	+	0	ID=vitri10g01140-mRNA-1:cds;Parent=vitri10g01140-mRNA-1
chr10_pilon_pilon	maker	exon	2101633	2101720	.	+	.	ID=vitri10g01140-mRNA-1:exon:536;Parent=vitri10g01140-mRNA-1
chr10_pilon_pilon	maker	CDS	2101633	2101720	.	+	1	ID=vitri10g01140-mRNA-1:cds;Parent=vitri10g01140-mRNA-1
###
chr10_pilon_pilon	maker	gene	2117511	2118117	.	-	.	ID=vitri10g01150;Name=vitri10g01150;Note=Protein of unknown function
chr10_pilon_pilon	maker	mRNA	2117511	2118117	.	-	.	ID=vitri10g01150-mRNA-1;Parent=vitri10g01150;Name=vitri10g01150-mRNA-1;_AED=0.35;_eAED=0.44;_QI=0|0|0|1|0|0.5|2|0|175;Note=Protein of unknown function
chr10_pilon_pilon	maker	exon	2117511	2117660	.	-	.	ID=vitri10g01150-mRNA-1:exon:527;Parent=vitri10g01150-mRNA-1
chr10_pilon_pilon	maker	CDS	2117511	2117660	.	-	0	ID=vitri10g01150-mRNA-1:cds;Parent=vitri10g01150-mRNA-1
chr10_pilon_pilon	maker	exon	2117740	2118117	.	-	.	ID=vitri10g01150-mRNA-1:exon:528;Parent=vitri10g01150-mRNA-1
chr10_pilon_pilon	maker	CDS	2117740	2118117	.	-	0	ID=vitri10g01150-mRNA-1:cds;Parent=vitri10g01150-mRNA-1
###
chr10_pilon_pilon	maker	gene	2118241	2120235	.	-	.	ID=vitri10g01160;Name=vitri10g01160;Note=Protein of unknown function
chr10_pilon_pilon	maker	mRNA	2118241	2120235	.	-	.	ID=vitri10g01160-mRNA-1;Parent=vitri10g01160;Name=vitri10g01160-mRNA-1;_AED=0.44;_eAED=0.44;_QI=0|0|0|1|0|0|3|0|72;Note=Protein of unknown function
chr10_pilon_pilon	maker	exon	2118241	2118297	.	-	.	ID=vitri10g01160-mRNA-1:exon:539;Parent=vitri10g01160-mRNA-1
chr10_pilon_pilon	maker	CDS	2118241	2118297	.	-	0	ID=vitri10g01160-mRNA-1:cds;Parent=vitri10g01160-mRNA-1
chr10_pilon_pilon	maker	exon	2120056	2120147	.	-	.	ID=vitri10g01160-mRNA-1:exon:540;Parent=vitri10g01160-mRNA-1
chr10_pilon_pilon	maker	CDS	2120056	2120147	.	-	2	ID=vitri10g01160-mRNA-1:cds;Parent=vitri10g01160-mRNA-1
chr10_pilon_pilon	maker	exon	2120166	2120235	.	-	.	ID=vitri10g01160-mRNA-1:exon:541;Parent=vitri10g01160-mRNA-1
chr10_pilon_pilon	maker	CDS	2120166	2120235	.	-	0	ID=vitri10g01160-mRNA-1:cds;Parent=vitri10g01160-mRNA-1
###
chr10_pilon_pilon	maker	gene	2146919	2171854	.	+	.	ID=vitri10g01170;Name=vitri10g01170;Note=Protein of unknown function;Dbxref=Gene3D:G3DSA:2.120.10.30,InterPro:IPR004141,InterPro:IPR011042,InterPro:IPR018119,PANTHER:PTHR10426,PANTHER:PTHR10426:SF33,Pfam:PF03088,ProSiteProfiles:PS51257,SUPERFAMILY:SSF63829,SignalP_EUK:SignalP-noTM;Ontology_term=GO:0009058,GO:0016844
chr10_pilon_pilon	maker	mRNA	2146919	2171854	.	+	.	ID=vitri10g01170-mRNA-1;Parent=vitri10g01170;Name=vitri10g01170-mRNA-1;_AED=0.32;_eAED=0.37;_QI=0|0|0|1|1|1|7|0|479;Note=Protein of unknown function;Dbxref=Gene3D:G3DSA:2.120.10.30,InterPro:IPR004141,InterPro:IPR011042,InterPro:IPR018119,PANTHER:PTHR10426,PANTHER:PTHR10426:SF33,Pfam:PF03088,ProSiteProfiles:PS51257,SUPERFAMILY:SSF63829,SignalP_EUK:SignalP-noTM;Ontology_term=GO:0009058,GO:0016844
chr10_pilon_pilon	maker	exon	2146919	2147160	.	+	.	ID=vitri10g01170-mRNA-1:exon:515;Parent=vitri10g01170-mRNA-1
chr10_pilon_pilon	maker	CDS	2146919	2147160	.	+	0	ID=vitri10g01170-mRNA-1:cds;Parent=vitri10g01170-mRNA-1
chr10_pilon_pilon	maker	exon	2147429	2147698	.	+	.	ID=vitri10g01170-mRNA-1:exon:516;Parent=vitri10g01170-mRNA-1
chr10_pilon_pilon	maker	CDS	2147429	2147698	.	+	1	ID=vitri10g01170-mRNA-1:cds;Parent=vitri10g01170-mRNA-1
chr10_pilon_pilon	maker	exon	2147813	2148003	.	+	.	ID=vitri10g01170-mRNA-1:exon:517;Parent=vitri10g01170-mRNA-1
chr10_pilon_pilon	maker	CDS	2147813	2148003	.	+	1	ID=vitri10g01170-mRNA-1:cds;Parent=vitri10g01170-mRNA-1
chr10_pilon_pilon	maker	exon	2165125	2165293	.	+	.	ID=vitri10g01170-mRNA-1:exon:518;Parent=vitri10g01170-mRNA-1
chr10_pilon_pilon	maker	CDS	2165125	2165293	.	+	2	ID=vitri10g01170-mRNA-1:cds;Parent=vitri10g01170-mRNA-1
chr10_pilon_pilon	maker	exon	2165560	2165829	.	+	.	ID=vitri10g01170-mRNA-1:exon:519;Parent=vitri10g01170-mRNA-1
chr10_pilon_pilon	maker	CDS	2165560	2165829	.	+	1	ID=vitri10g01170-mRNA-1:cds;Parent=vitri10g01170-mRNA-1
chr10_pilon_pilon	maker	exon	2165930	2166120	.	+	.	ID=vitri10g01170-mRNA-1:exon:520;Parent=vitri10g01170-mRNA-1
chr10_pilon_pilon	maker	CDS	2165930	2166120	.	+	1	ID=vitri10g01170-mRNA-1:cds;Parent=vitri10g01170-mRNA-1
chr10_pilon_pilon	maker	exon	2171748	2171854	.	+	.	ID=vitri10g01170-mRNA-1:exon:521;Parent=vitri10g01170-mRNA-1
chr10_pilon_pilon	maker	CDS	2171748	2171854	.	+	2	ID=vitri10g01170-mRNA-1:cds;Parent=vitri10g01170-mRNA-1
###
chr10_pilon_pilon	maker	gene	2172427	2179243	.	-	.	ID=vitri10g01180;Name=vitri10g01180;Note=Similar to RNR2A: Ribonucleoside-diphosphate reductase small chain A (Arabidopsis thaliana OX%3D3702)
chr10_pilon_pilon	maker	mRNA	2172427	2177338	.	-	.	ID=vitri10g01180-mRNA-3;Parent=vitri10g01180;Name=vitri10g01180-mRNA-3;_AED=0.47;_eAED=0.55;_QI=99|0.16|0.14|1|0|0.14|7|0|246;Note=Similar to RNR2A: Ribonucleoside-diphosphate reductase small chain A (Arabidopsis thaliana OX%3D3702)
chr10_pilon_pilon	maker	CDS	2172427	2172541	.	-	1	ID=vitri10g01180-mRNA-3:cds;Parent=vitri10g01180-mRNA-3
chr10_pilon_pilon	maker	CDS	2173251	2173364	.	-	1	ID=vitri10g01180-mRNA-3:cds;Parent=vitri10g01180-mRNA-3
chr10_pilon_pilon	maker	CDS	2173922	2174054	.	-	2	ID=vitri10g01180-mRNA-3:cds;Parent=vitri10g01180-mRNA-3
chr10_pilon_pilon	maker	CDS	2174201	2174280	.	-	1	ID=vitri10g01180-mRNA-3:cds;Parent=vitri10g01180-mRNA-3
chr10_pilon_pilon	maker	CDS	2175394	2175551	.	-	0	ID=vitri10g01180-mRNA-3:cds;Parent=vitri10g01180-mRNA-3
chr10_pilon_pilon	maker	CDS	2176916	2177014	.	-	0	ID=vitri10g01180-mRNA-3:cds;Parent=vitri10g01180-mRNA-3
chr10_pilon_pilon	maker	CDS	2177198	2177239	.	-	0	ID=vitri10g01180-mRNA-3:cds;Parent=vitri10g01180-mRNA-3
chr10_pilon_pilon	maker	exon	2177198	2177338	.	-	.	ID=vitri10g01180-mRNA-3:exon:382;Parent=vitri10g01180-mRNA-3
chr10_pilon_pilon	maker	five_prime_UTR	2177240	2177338	.	-	.	ID=vitri10g01180-mRNA-3:five_prime_utr;Parent=vitri10g01180-mRNA-3
chr10_pilon_pilon	maker	mRNA	2172427	2179243	.	-	.	ID=vitri10g01180-mRNA-1;Parent=vitri10g01180;Name=vitri10g01180-mRNA-1;_AED=0.42;_eAED=0.48;_QI=319|0.27|0.25|1|0|0.08|12|0|279;Note=Protein of unknown function
chr10_pilon_pilon	maker	CDS	2172427	2172541	.	-	1	ID=vitri10g01180-mRNA-1:cds;Parent=vitri10g01180-mRNA-1
chr10_pilon_pilon	maker	CDS	2173251	2173364	.	-	1	ID=vitri10g01180-mRNA-1:cds;Parent=vitri10g01180-mRNA-1
chr10_pilon_pilon	maker	CDS	2173922	2174054	.	-	2	ID=vitri10g01180-mRNA-1:cds;Parent=vitri10g01180-mRNA-1
chr10_pilon_pilon	maker	CDS	2174201	2174280	.	-	1	ID=vitri10g01180-mRNA-1:cds;Parent=vitri10g01180-mRNA-1
chr10_pilon_pilon	maker	exon	2175394	2175511	.	-	.	ID=vitri10g01180-mRNA-1:exon:376;Parent=vitri10g01180-mRNA-1
chr10_pilon_pilon	maker	CDS	2175394	2175511	.	-	2	ID=vitri10g01180-mRNA-1:cds;Parent=vitri10g01180-mRNA-1
chr10_pilon_pilon	maker	exon	2176021	2176063	.	-	.	ID=vitri10g01180-mRNA-1:exon:375;Parent=vitri10g01180-mRNA-1
chr10_pilon_pilon	maker	CDS	2176021	2176063	.	-	0	ID=vitri10g01180-mRNA-1:cds;Parent=vitri10g01180-mRNA-1
chr10_pilon_pilon	maker	CDS	2176916	2177014	.	-	0	ID=vitri10g01180-mRNA-1:cds;Parent=vitri10g01180-mRNA-1
chr10_pilon_pilon	maker	CDS	2177927	2177992	.	-	0	ID=vitri10g01180-mRNA-1:cds;Parent=vitri10g01180-mRNA-1
chr10_pilon_pilon	maker	CDS	2178278	2178322	.	-	0	ID=vitri10g01180-mRNA-1:cds;Parent=vitri10g01180-mRNA-1
chr10_pilon_pilon	maker	CDS	2178432	2178458	.	-	0	ID=vitri10g01180-mRNA-1:cds;Parent=vitri10g01180-mRNA-1
chr10_pilon_pilon	maker	five_prime_UTR	2178459	2178535	.	-	.	ID=vitri10g01180-mRNA-1:five_prime_utr;Parent=vitri10g01180-mRNA-1
chr10_pilon_pilon	maker	five_prime_UTR	2178915	2179100	.	-	.	ID=vitri10g01180-mRNA-1:five_prime_utr;Parent=vitri10g01180-mRNA-1
chr10_pilon_pilon	maker	five_prime_UTR	2179188	2179243	.	-	.	ID=vitri10g01180-mRNA-1:five_prime_utr;Parent=vitri10g01180-mRNA-1
chr10_pilon_pilon	maker	mRNA	2172427	2179243	.	-	.	ID=vitri10g01180-mRNA-2;Parent=vitri10g01180;Name=vitri10g01180-mRNA-2;_AED=0.42;_eAED=0.48;_QI=319|0.3|0.27|1|0|0.09|11|0|278;Note=Protein of unknown function
chr10_pilon_pilon	maker	exon	2172427	2172541	.	-	.	ID=vitri10g01180-mRNA-1:exon:380;Parent=vitri10g01180-mRNA-3,vitri10g01180-mRNA-1,vitri10g01180-mRNA-2
chr10_pilon_pilon	maker	CDS	2172427	2172541	.	-	1	ID=vitri10g01180-mRNA-2:cds;Parent=vitri10g01180-mRNA-2
chr10_pilon_pilon	maker	exon	2173251	2173364	.	-	.	ID=vitri10g01180-mRNA-1:exon:379;Parent=vitri10g01180-mRNA-3,vitri10g01180-mRNA-1,vitri10g01180-mRNA-2
chr10_pilon_pilon	maker	CDS	2173251	2173364	.	-	1	ID=vitri10g01180-mRNA-2:cds;Parent=vitri10g01180-mRNA-2
chr10_pilon_pilon	maker	exon	2173922	2174054	.	-	.	ID=vitri10g01180-mRNA-1:exon:378;Parent=vitri10g01180-mRNA-3,vitri10g01180-mRNA-1,vitri10g01180-mRNA-2
chr10_pilon_pilon	maker	CDS	2173922	2174054	.	-	2	ID=vitri10g01180-mRNA-2:cds;Parent=vitri10g01180-mRNA-2
chr10_pilon_pilon	maker	exon	2174201	2174280	.	-	.	ID=vitri10g01180-mRNA-1:exon:377;Parent=vitri10g01180-mRNA-3,vitri10g01180-mRNA-1,vitri10g01180-mRNA-2
chr10_pilon_pilon	maker	CDS	2174201	2174280	.	-	1	ID=vitri10g01180-mRNA-2:cds;Parent=vitri10g01180-mRNA-2
chr10_pilon_pilon	maker	exon	2175394	2175551	.	-	.	ID=vitri10g01180-mRNA-2:exon:381;Parent=vitri10g01180-mRNA-3,vitri10g01180-mRNA-2
chr10_pilon_pilon	maker	CDS	2175394	2175551	.	-	0	ID=vitri10g01180-mRNA-2:cds;Parent=vitri10g01180-mRNA-2
chr10_pilon_pilon	maker	exon	2176916	2177014	.	-	.	ID=vitri10g01180-mRNA-1:exon:374;Parent=vitri10g01180-mRNA-3,vitri10g01180-mRNA-1,vitri10g01180-mRNA-2
chr10_pilon_pilon	maker	CDS	2176916	2177014	.	-	0	ID=vitri10g01180-mRNA-2:cds;Parent=vitri10g01180-mRNA-2
chr10_pilon_pilon	maker	exon	2177927	2177992	.	-	.	ID=vitri10g01180-mRNA-1:exon:373;Parent=vitri10g01180-mRNA-1,vitri10g01180-mRNA-2
chr10_pilon_pilon	maker	CDS	2177927	2177992	.	-	0	ID=vitri10g01180-mRNA-2:cds;Parent=vitri10g01180-mRNA-2
chr10_pilon_pilon	maker	exon	2178278	2178322	.	-	.	ID=vitri10g01180-mRNA-1:exon:372;Parent=vitri10g01180-mRNA-1,vitri10g01180-mRNA-2
chr10_pilon_pilon	maker	CDS	2178278	2178322	.	-	0	ID=vitri10g01180-mRNA-2:cds;Parent=vitri10g01180-mRNA-2
chr10_pilon_pilon	maker	CDS	2178432	2178458	.	-	0	ID=vitri10g01180-mRNA-2:cds;Parent=vitri10g01180-mRNA-2
chr10_pilon_pilon	maker	exon	2178432	2178535	.	-	.	ID=vitri10g01180-mRNA-1:exon:371;Parent=vitri10g01180-mRNA-1,vitri10g01180-mRNA-2
chr10_pilon_pilon	maker	five_prime_UTR	2178459	2178535	.	-	.	ID=vitri10g01180-mRNA-2:five_prime_utr;Parent=vitri10g01180-mRNA-2
chr10_pilon_pilon	maker	exon	2178915	2179100	.	-	.	ID=vitri10g01180-mRNA-1:exon:370;Parent=vitri10g01180-mRNA-1,vitri10g01180-mRNA-2
chr10_pilon_pilon	maker	five_prime_UTR	2178915	2179100	.	-	.	ID=vitri10g01180-mRNA-2:five_prime_utr;Parent=vitri10g01180-mRNA-2
chr10_pilon_pilon	maker	exon	2179188	2179243	.	-	.	ID=vitri10g01180-mRNA-1:exon:369;Parent=vitri10g01180-mRNA-1,vitri10g01180-mRNA-2
chr10_pilon_pilon	maker	five_prime_UTR	2179188	2179243	.	-	.	ID=vitri10g01180-mRNA-2:five_prime_utr;Parent=vitri10g01180-mRNA-2
###
chr10_pilon_pilon	maker	gene	2194772	2217997	.	+	.	ID=vitri10g01190;Name=vitri10g01190;Note=Protein of unknown function;Dbxref=Gene3D:G3DSA:2.120.10.30,InterPro:IPR004141,InterPro:IPR011042,InterPro:IPR018119,PANTHER:PTHR10426,PANTHER:PTHR10426:SF33,Pfam:PF03088,SUPERFAMILY:SSF63829;Ontology_term=GO:0009058,GO:0016844
chr10_pilon_pilon	maker	mRNA	2194772	2217997	.	+	.	ID=vitri10g01190-mRNA-1;Parent=vitri10g01190;Name=vitri10g01190-mRNA-1;_AED=0.32;_eAED=0.34;_QI=0|0|0|1|1|1|6|0|493;Note=Protein of unknown function;Dbxref=Gene3D:G3DSA:2.120.10.30,InterPro:IPR004141,InterPro:IPR011042,InterPro:IPR018119,PANTHER:PTHR10426,PANTHER:PTHR10426:SF33,Pfam:PF03088,SUPERFAMILY:SSF63829;Ontology_term=GO:0009058,GO:0016844
chr10_pilon_pilon	maker	exon	2194772	2195073	.	+	.	ID=vitri10g01190-mRNA-1:exon:359;Parent=vitri10g01190-mRNA-1
chr10_pilon_pilon	maker	CDS	2194772	2195073	.	+	0	ID=vitri10g01190-mRNA-1:cds;Parent=vitri10g01190-mRNA-1
chr10_pilon_pilon	maker	exon	2195343	2195612	.	+	.	ID=vitri10g01190-mRNA-1:exon:360;Parent=vitri10g01190-mRNA-1
chr10_pilon_pilon	maker	CDS	2195343	2195612	.	+	1	ID=vitri10g01190-mRNA-1:cds;Parent=vitri10g01190-mRNA-1
chr10_pilon_pilon	maker	exon	2202285	2202554	.	+	.	ID=vitri10g01190-mRNA-1:exon:361;Parent=vitri10g01190-mRNA-1
chr10_pilon_pilon	maker	CDS	2202285	2202554	.	+	1	ID=vitri10g01190-mRNA-1:cds;Parent=vitri10g01190-mRNA-1
chr10_pilon_pilon	maker	exon	2202659	2202849	.	+	.	ID=vitri10g01190-mRNA-1:exon:362;Parent=vitri10g01190-mRNA-1
chr10_pilon_pilon	maker	CDS	2202659	2202849	.	+	1	ID=vitri10g01190-mRNA-1:cds;Parent=vitri10g01190-mRNA-1
chr10_pilon_pilon	maker	exon	2217232	2217349	.	+	.	ID=vitri10g01190-mRNA-1:exon:363;Parent=vitri10g01190-mRNA-1
chr10_pilon_pilon	maker	CDS	2217232	2217349	.	+	2	ID=vitri10g01190-mRNA-1:cds;Parent=vitri10g01190-mRNA-1
chr10_pilon_pilon	maker	exon	2217667	2217997	.	+	.	ID=vitri10g01190-mRNA-1:exon:364;Parent=vitri10g01190-mRNA-1
chr10_pilon_pilon	maker	CDS	2217667	2217997	.	+	1	ID=vitri10g01190-mRNA-1:cds;Parent=vitri10g01190-mRNA-1
###
chr10_pilon_pilon	maker	gene	2229256	2229553	.	+	.	ID=vitri10g01200;Name=vitri10g01200;Note=Protein of unknown function;Dbxref=MobiDBLite:mobidb-lite
chr10_pilon_pilon	maker	mRNA	2229256	2229553	.	+	.	ID=vitri10g01200-mRNA-1;Parent=vitri10g01200;Name=vitri10g01200-mRNA-1;_AED=0.41;_eAED=0.43;_QI=0|0|0|1|0|0|2|0|71;Note=Protein of unknown function;Dbxref=MobiDBLite:mobidb-lite
chr10_pilon_pilon	maker	exon	2229256	2229333	.	+	.	ID=vitri10g01200-mRNA-1:exon:394;Parent=vitri10g01200-mRNA-1
chr10_pilon_pilon	maker	CDS	2229256	2229333	.	+	0	ID=vitri10g01200-mRNA-1:cds;Parent=vitri10g01200-mRNA-1
chr10_pilon_pilon	maker	exon	2229416	2229553	.	+	.	ID=vitri10g01200-mRNA-1:exon:395;Parent=vitri10g01200-mRNA-1
chr10_pilon_pilon	maker	CDS	2229416	2229553	.	+	0	ID=vitri10g01200-mRNA-1:cds;Parent=vitri10g01200-mRNA-1
###
chr10_pilon_pilon	maker	gene	2229617	2230264	.	+	.	ID=vitri10g01210;Name=vitri10g01210;Note=Protein of unknown function
chr10_pilon_pilon	maker	mRNA	2229617	2230264	.	+	.	ID=vitri10g01210-mRNA-1;Parent=vitri10g01210;Name=vitri10g01210-mRNA-1;_AED=0.35;_eAED=0.84;_QI=0|0|0|1|0|0.5|2|0|117;Note=Protein of unknown function
chr10_pilon_pilon	maker	exon	2229617	2229712	.	+	.	ID=vitri10g01210-mRNA-1:exon:367;Parent=vitri10g01210-mRNA-1
chr10_pilon_pilon	maker	CDS	2229617	2229712	.	+	0	ID=vitri10g01210-mRNA-1:cds;Parent=vitri10g01210-mRNA-1
chr10_pilon_pilon	maker	exon	2230007	2230264	.	+	.	ID=vitri10g01210-mRNA-1:exon:368;Parent=vitri10g01210-mRNA-1
chr10_pilon_pilon	maker	CDS	2230007	2230264	.	+	0	ID=vitri10g01210-mRNA-1:cds;Parent=vitri10g01210-mRNA-1
###
chr10_pilon_pilon	maker	gene	2234084	2236419	.	-	.	ID=vitri10g01220;Name=vitri10g01220;Note=Protein of unknown function;Dbxref=MobiDBLite:mobidb-lite,PANTHER:PTHR33176,PANTHER:PTHR33176:SF1
chr10_pilon_pilon	maker	mRNA	2234084	2236419	.	-	.	ID=vitri10g01220-mRNA-1;Parent=vitri10g01220;Name=vitri10g01220-mRNA-1;_AED=0.27;_eAED=0.28;_QI=0|0|0|1|0|0|5|0|354;Note=Protein of unknown function;Dbxref=MobiDBLite:mobidb-lite,PANTHER:PTHR33176,PANTHER:PTHR33176:SF1
chr10_pilon_pilon	maker	exon	2234084	2234170	.	-	.	ID=vitri10g01220-mRNA-1:exon:383;Parent=vitri10g01220-mRNA-1
chr10_pilon_pilon	maker	CDS	2234084	2234170	.	-	0	ID=vitri10g01220-mRNA-1:cds;Parent=vitri10g01220-mRNA-1
chr10_pilon_pilon	maker	exon	2235121	2235488	.	-	.	ID=vitri10g01220-mRNA-1:exon:384;Parent=vitri10g01220-mRNA-1
chr10_pilon_pilon	maker	CDS	2235121	2235488	.	-	2	ID=vitri10g01220-mRNA-1:cds;Parent=vitri10g01220-mRNA-1
chr10_pilon_pilon	maker	exon	2235509	2235556	.	-	.	ID=vitri10g01220-mRNA-1:exon:385;Parent=vitri10g01220-mRNA-1
chr10_pilon_pilon	maker	CDS	2235509	2235556	.	-	2	ID=vitri10g01220-mRNA-1:cds;Parent=vitri10g01220-mRNA-1
chr10_pilon_pilon	maker	exon	2235842	2235965	.	-	.	ID=vitri10g01220-mRNA-1:exon:386;Parent=vitri10g01220-mRNA-1
chr10_pilon_pilon	maker	CDS	2235842	2235965	.	-	0	ID=vitri10g01220-mRNA-1:cds;Parent=vitri10g01220-mRNA-1
chr10_pilon_pilon	maker	exon	2235982	2236419	.	-	.	ID=vitri10g01220-mRNA-1:exon:387;Parent=vitri10g01220-mRNA-1
chr10_pilon_pilon	maker	CDS	2235982	2236419	.	-	0	ID=vitri10g01220-mRNA-1:cds;Parent=vitri10g01220-mRNA-1
###
chr10_pilon_pilon	maker	gene	2265094	2271535	.	+	.	ID=vitri10g01230;Name=vitri10g01230;Note=Protein of unknown function;Dbxref=MobiDBLite:mobidb-lite
chr10_pilon_pilon	maker	mRNA	2265094	2271535	.	+	.	ID=vitri10g01230-mRNA-1;Parent=vitri10g01230;Name=vitri10g01230-mRNA-1;_AED=0.29;_eAED=0.65;_QI=0|0|0|1|0|0|5|0|198;Note=Protein of unknown function;Dbxref=MobiDBLite:mobidb-lite
chr10_pilon_pilon	maker	exon	2265094	2265183	.	+	.	ID=vitri10g01230-mRNA-1:exon:595;Parent=vitri10g01230-mRNA-1
chr10_pilon_pilon	maker	CDS	2265094	2265183	.	+	0	ID=vitri10g01230-mRNA-1:cds;Parent=vitri10g01230-mRNA-1
chr10_pilon_pilon	maker	exon	2269801	2269890	.	+	.	ID=vitri10g01230-mRNA-1:exon:596;Parent=vitri10g01230-mRNA-1
chr10_pilon_pilon	maker	CDS	2269801	2269890	.	+	0	ID=vitri10g01230-mRNA-1:cds;Parent=vitri10g01230-mRNA-1
chr10_pilon_pilon	maker	exon	2270383	2270489	.	+	.	ID=vitri10g01230-mRNA-1:exon:597;Parent=vitri10g01230-mRNA-1
chr10_pilon_pilon	maker	CDS	2270383	2270489	.	+	0	ID=vitri10g01230-mRNA-1:cds;Parent=vitri10g01230-mRNA-1
chr10_pilon_pilon	maker	exon	2270866	2270963	.	+	.	ID=vitri10g01230-mRNA-1:exon:598;Parent=vitri10g01230-mRNA-1
chr10_pilon_pilon	maker	CDS	2270866	2270963	.	+	1	ID=vitri10g01230-mRNA-1:cds;Parent=vitri10g01230-mRNA-1
chr10_pilon_pilon	maker	exon	2271324	2271535	.	+	.	ID=vitri10g01230-mRNA-1:exon:599;Parent=vitri10g01230-mRNA-1
chr10_pilon_pilon	maker	CDS	2271324	2271535	.	+	2	ID=vitri10g01230-mRNA-1:cds;Parent=vitri10g01230-mRNA-1
###
chr10_pilon_pilon	maker	gene	2270815	2271449	.	-	.	ID=vitri10g01240;Name=vitri10g01240;Note=Protein of unknown function;Dbxref=MobiDBLite:mobidb-lite
chr10_pilon_pilon	maker	mRNA	2270815	2271449	.	-	.	ID=vitri10g01240-mRNA-1;Parent=vitri10g01240;Name=vitri10g01240-mRNA-1;_AED=0.02;_eAED=0.02;_QI=0|0|0|1|0|0|2|0|139;Note=Protein of unknown function;Dbxref=MobiDBLite:mobidb-lite
chr10_pilon_pilon	maker	exon	2270815	2271152	.	-	.	ID=vitri10g01240-mRNA-1:exon:388;Parent=vitri10g01240-mRNA-1
chr10_pilon_pilon	maker	CDS	2270815	2271152	.	-	2	ID=vitri10g01240-mRNA-1:cds;Parent=vitri10g01240-mRNA-1
chr10_pilon_pilon	maker	exon	2271368	2271449	.	-	.	ID=vitri10g01240-mRNA-1:exon:389;Parent=vitri10g01240-mRNA-1
chr10_pilon_pilon	maker	CDS	2271368	2271449	.	-	0	ID=vitri10g01240-mRNA-1:cds;Parent=vitri10g01240-mRNA-1
###
chr10_pilon_pilon	maker	gene	2284802	2286532	.	+	.	ID=vitri10g01250;Name=vitri10g01250;Note=Protein of unknown function
chr10_pilon_pilon	maker	mRNA	2284802	2286532	.	+	.	ID=vitri10g01250-mRNA-1;Parent=vitri10g01250;Name=vitri10g01250-mRNA-1;_AED=0.29;_eAED=0.46;_QI=0|0|0|1|0.5|0.66|3|0|135;Note=Protein of unknown function
chr10_pilon_pilon	maker	exon	2284802	2284905	.	+	.	ID=vitri10g01250-mRNA-1:exon:576;Parent=vitri10g01250-mRNA-1
chr10_pilon_pilon	maker	CDS	2284802	2284905	.	+	0	ID=vitri10g01250-mRNA-1:cds;Parent=vitri10g01250-mRNA-1
chr10_pilon_pilon	maker	exon	2285393	2285506	.	+	.	ID=vitri10g01250-mRNA-1:exon:577;Parent=vitri10g01250-mRNA-1
chr10_pilon_pilon	maker	CDS	2285393	2285506	.	+	1	ID=vitri10g01250-mRNA-1:cds;Parent=vitri10g01250-mRNA-1
chr10_pilon_pilon	maker	exon	2286343	2286532	.	+	.	ID=vitri10g01250-mRNA-1:exon:578;Parent=vitri10g01250-mRNA-1
chr10_pilon_pilon	maker	CDS	2286343	2286532	.	+	1	ID=vitri10g01250-mRNA-1:cds;Parent=vitri10g01250-mRNA-1
###
chr10_pilon_pilon	maker	gene	2285834	2286468	.	-	.	ID=vitri10g01260;Name=vitri10g01260;Note=Protein of unknown function;Dbxref=MobiDBLite:mobidb-lite
chr10_pilon_pilon	maker	mRNA	2285834	2286468	.	-	.	ID=vitri10g01260-mRNA-1;Parent=vitri10g01260;Name=vitri10g01260-mRNA-1;_AED=0.02;_eAED=0.02;_QI=0|0|0|1|0|0|2|0|139;Note=Protein of unknown function;Dbxref=MobiDBLite:mobidb-lite
chr10_pilon_pilon	maker	exon	2285834	2286171	.	-	.	ID=vitri10g01260-mRNA-1:exon:390;Parent=vitri10g01260-mRNA-1
chr10_pilon_pilon	maker	CDS	2285834	2286171	.	-	2	ID=vitri10g01260-mRNA-1:cds;Parent=vitri10g01260-mRNA-1
chr10_pilon_pilon	maker	exon	2286387	2286468	.	-	.	ID=vitri10g01260-mRNA-1:exon:391;Parent=vitri10g01260-mRNA-1
chr10_pilon_pilon	maker	CDS	2286387	2286468	.	-	0	ID=vitri10g01260-mRNA-1:cds;Parent=vitri10g01260-mRNA-1
###
chr10_pilon_pilon	maker	gene	2296238	2298228	.	-	.	ID=vitri10g01270;Name=vitri10g01270;Note=Protein of unknown function
chr10_pilon_pilon	maker	mRNA	2296238	2298228	.	-	.	ID=vitri10g01270-mRNA-1;Parent=vitri10g01270;Name=vitri10g01270-mRNA-1;_AED=0.34;_eAED=0.34;_QI=519|0.33|0.5|1|0|0|4|0|148;Note=Protein of unknown function
chr10_pilon_pilon	maker	exon	2296238	2296364	.	-	.	ID=vitri10g01270-mRNA-1:exon:594;Parent=vitri10g01270-mRNA-1
chr10_pilon_pilon	maker	CDS	2296238	2296364	.	-	1	ID=vitri10g01270-mRNA-1:cds;Parent=vitri10g01270-mRNA-1
chr10_pilon_pilon	maker	exon	2296737	2296952	.	-	.	ID=vitri10g01270-mRNA-1:exon:593;Parent=vitri10g01270-mRNA-1
chr10_pilon_pilon	maker	CDS	2296737	2296952	.	-	1	ID=vitri10g01270-mRNA-1:cds;Parent=vitri10g01270-mRNA-1
chr10_pilon_pilon	maker	CDS	2297422	2297525	.	-	0	ID=vitri10g01270-mRNA-1:cds;Parent=vitri10g01270-mRNA-1
chr10_pilon_pilon	maker	exon	2297422	2297904	.	-	.	ID=vitri10g01270-mRNA-1:exon:592;Parent=vitri10g01270-mRNA-1
chr10_pilon_pilon	maker	five_prime_UTR	2297526	2297904	.	-	.	ID=vitri10g01270-mRNA-1:five_prime_utr;Parent=vitri10g01270-mRNA-1
chr10_pilon_pilon	maker	exon	2298089	2298228	.	-	.	ID=vitri10g01270-mRNA-1:exon:591;Parent=vitri10g01270-mRNA-1
chr10_pilon_pilon	maker	five_prime_UTR	2298089	2298228	.	-	.	ID=vitri10g01270-mRNA-1:five_prime_utr;Parent=vitri10g01270-mRNA-1
###
chr10_pilon_pilon	maker	gene	2322407	2327660	.	+	.	ID=vitri10g01280;Name=vitri10g01280;Note=Similar to SSL10: Protein STRICTOSIDINE SYNTHASE-LIKE 10 (Arabidopsis thaliana OX%3D3702);Dbxref=Gene3D:G3DSA:2.120.10.30,InterPro:IPR004141,InterPro:IPR011042,InterPro:IPR018119,PANTHER:PTHR10426,PANTHER:PTHR10426:SF33,Pfam:PF03088,ProSiteProfiles:PS51257,SUPERFAMILY:SSF63829,SignalP_EUK:SignalP-noTM;Ontology_term=GO:0009058,GO:0016844
chr10_pilon_pilon	maker	mRNA	2322407	2327660	.	+	.	ID=vitri10g01280-mRNA-1;Parent=vitri10g01280;Name=vitri10g01280-mRNA-1;_AED=0.26;_eAED=0.26;_QI=0|0|0|1|1|1|6|0|532;Note=Similar to SSL10: Protein STRICTOSIDINE SYNTHASE-LIKE 10 (Arabidopsis thaliana OX%3D3702);Dbxref=Gene3D:G3DSA:2.120.10.30,InterPro:IPR004141,InterPro:IPR011042,InterPro:IPR018119,PANTHER:PTHR10426,PANTHER:PTHR10426:SF33,Pfam:PF03088,ProSiteProfiles:PS51257,SUPERFAMILY:SSF63829,SignalP_EUK:SignalP-noTM;Ontology_term=GO:0009058,GO:0016844
chr10_pilon_pilon	maker	exon	2322407	2322648	.	+	.	ID=vitri10g01280-mRNA-1:exon:569;Parent=vitri10g01280-mRNA-1
chr10_pilon_pilon	maker	CDS	2322407	2322648	.	+	0	ID=vitri10g01280-mRNA-1:cds;Parent=vitri10g01280-mRNA-1
chr10_pilon_pilon	maker	exon	2322913	2323182	.	+	.	ID=vitri10g01280-mRNA-1:exon:570;Parent=vitri10g01280-mRNA-1
chr10_pilon_pilon	maker	CDS	2322913	2323182	.	+	1	ID=vitri10g01280-mRNA-1:cds;Parent=vitri10g01280-mRNA-1
chr10_pilon_pilon	maker	exon	2323287	2323477	.	+	.	ID=vitri10g01280-mRNA-1:exon:571;Parent=vitri10g01280-mRNA-1
chr10_pilon_pilon	maker	CDS	2323287	2323477	.	+	1	ID=vitri10g01280-mRNA-1:cds;Parent=vitri10g01280-mRNA-1
chr10_pilon_pilon	maker	exon	2326399	2326567	.	+	.	ID=vitri10g01280-mRNA-1:exon:572;Parent=vitri10g01280-mRNA-1
chr10_pilon_pilon	maker	CDS	2326399	2326567	.	+	2	ID=vitri10g01280-mRNA-1:cds;Parent=vitri10g01280-mRNA-1
chr10_pilon_pilon	maker	exon	2326834	2327103	.	+	.	ID=vitri10g01280-mRNA-1:exon:573;Parent=vitri10g01280-mRNA-1
chr10_pilon_pilon	maker	CDS	2326834	2327103	.	+	1	ID=vitri10g01280-mRNA-1:cds;Parent=vitri10g01280-mRNA-1
chr10_pilon_pilon	maker	exon	2327204	2327660	.	+	.	ID=vitri10g01280-mRNA-1:exon:574;Parent=vitri10g01280-mRNA-1
chr10_pilon_pilon	maker	CDS	2327204	2327660	.	+	1	ID=vitri10g01280-mRNA-1:cds;Parent=vitri10g01280-mRNA-1
###
chr10_pilon_pilon	maker	gene	2336175	2336492	.	+	.	ID=vitri10g01290;Name=vitri10g01290;Note=Protein of unknown function;Dbxref=Coils:Coil,MobiDBLite:mobidb-lite
chr10_pilon_pilon	maker	mRNA	2336175	2336492	.	+	.	ID=vitri10g01290-mRNA-1;Parent=vitri10g01290;Name=vitri10g01290-mRNA-1;_AED=0.35;_eAED=0.36;_QI=0|-1|0|1|-1|1|1|0|105;Note=Protein of unknown function;Dbxref=Coils:Coil,MobiDBLite:mobidb-lite
chr10_pilon_pilon	maker	exon	2336175	2336492	.	+	.	ID=vitri10g01290-mRNA-1:exon:575;Parent=vitri10g01290-mRNA-1
chr10_pilon_pilon	maker	CDS	2336175	2336492	.	+	0	ID=vitri10g01290-mRNA-1:cds;Parent=vitri10g01290-mRNA-1
###
chr10_pilon_pilon	maker	gene	2342315	2343105	.	+	.	ID=vitri10g01300;Name=vitri10g01300;Note=Similar to PAC1: Proteasome subunit alpha type-4 (Spinacia oleracea OX%3D3562);Dbxref=CDD:cd03752,Gene3D:G3DSA:3.60.20.10,InterPro:IPR001353,InterPro:IPR023332,InterPro:IPR029055,InterPro:IPR034647,PANTHER:PTHR11599,PANTHER:PTHR11599:SF13,Pfam:PF00227,ProSiteProfiles:PS51475,SUPERFAMILY:SSF56235;Ontology_term=GO:0004298,GO:0005839,GO:0019773,GO:0051603
chr10_pilon_pilon	maker	mRNA	2342315	2343105	.	+	.	ID=vitri10g01300-mRNA-1;Parent=vitri10g01300;Name=vitri10g01300-mRNA-1;_AED=0.12;_eAED=0.12;_QI=0|0|0.5|1|0|0|2|0|235;Note=Similar to PAC1: Proteasome subunit alpha type-4 (Spinacia oleracea OX%3D3562);Dbxref=CDD:cd03752,Gene3D:G3DSA:3.60.20.10,InterPro:IPR001353,InterPro:IPR023332,InterPro:IPR029055,InterPro:IPR034647,PANTHER:PTHR11599,PANTHER:PTHR11599:SF13,Pfam:PF00227,ProSiteProfiles:PS51475,SUPERFAMILY:SSF56235;Ontology_term=GO:0004298,GO:0005839,GO:0019773,GO:0051603
chr10_pilon_pilon	maker	exon	2342315	2342363	.	+	.	ID=vitri10g01300-mRNA-1:exon:567;Parent=vitri10g01300-mRNA-1
chr10_pilon_pilon	maker	CDS	2342315	2342363	.	+	0	ID=vitri10g01300-mRNA-1:cds;Parent=vitri10g01300-mRNA-1
chr10_pilon_pilon	maker	exon	2342447	2343105	.	+	.	ID=vitri10g01300-mRNA-1:exon:568;Parent=vitri10g01300-mRNA-1
chr10_pilon_pilon	maker	CDS	2342447	2343105	.	+	2	ID=vitri10g01300-mRNA-1:cds;Parent=vitri10g01300-mRNA-1
###
chr10_pilon_pilon	maker	gene	2352479	2354183	.	+	.	ID=vitri10g01310;Name=vitri10g01310;Note=Similar to PER55: Peroxidase 55 (Arabidopsis thaliana OX%3D3702);Dbxref=CDD:cd00693,Gene3D:G3DSA:1.10.420.10,Gene3D:G3DSA:1.10.520.10,InterPro:IPR000823,InterPro:IPR002016,InterPro:IPR010255,InterPro:IPR019793,InterPro:IPR019794,InterPro:IPR033905,PANTHER:PTHR31517,PANTHER:PTHR31517:SF18,PRINTS:PR00458,PRINTS:PR00461,Pfam:PF00141,ProSitePatterns:PS00435,ProSitePatterns:PS00436,ProSiteProfiles:PS50873,SUPERFAMILY:SSF48113,SignalP_EUK:SignalP-noTM;Ontology_term=GO:0004601,GO:0006979,GO:0020037,GO:0042744,GO:0055114
chr10_pilon_pilon	maker	mRNA	2352479	2354183	.	+	.	ID=vitri10g01310-mRNA-1;Parent=vitri10g01310;Name=vitri10g01310-mRNA-1;_AED=0.08;_eAED=0.08;_QI=0|0.5|0.33|1|1|1|3|314|255;Note=Similar to PER55: Peroxidase 55 (Arabidopsis thaliana OX%3D3702);Dbxref=CDD:cd00693,Gene3D:G3DSA:1.10.420.10,Gene3D:G3DSA:1.10.520.10,InterPro:IPR000823,InterPro:IPR002016,InterPro:IPR010255,InterPro:IPR019793,InterPro:IPR019794,InterPro:IPR033905,PANTHER:PTHR31517,PANTHER:PTHR31517:SF18,PRINTS:PR00458,PRINTS:PR00461,Pfam:PF00141,ProSitePatterns:PS00435,ProSitePatterns:PS00436,ProSiteProfiles:PS50873,SUPERFAMILY:SSF48113,SignalP_EUK:SignalP-noTM;Ontology_term=GO:0004601,GO:0006979,GO:0020037,GO:0042744,GO:0055114
chr10_pilon_pilon	maker	exon	2352479	2352715	.	+	.	ID=vitri10g01310-mRNA-1:exon:564;Parent=vitri10g01310-mRNA-1
chr10_pilon_pilon	maker	CDS	2352479	2352715	.	+	0	ID=vitri10g01310-mRNA-1:cds;Parent=vitri10g01310-mRNA-1
chr10_pilon_pilon	maker	exon	2353080	2353274	.	+	.	ID=vitri10g01310-mRNA-1:exon:565;Parent=vitri10g01310-mRNA-1
chr10_pilon_pilon	maker	CDS	2353080	2353274	.	+	0	ID=vitri10g01310-mRNA-1:cds;Parent=vitri10g01310-mRNA-1
chr10_pilon_pilon	maker	CDS	2353534	2353869	.	+	0	ID=vitri10g01310-mRNA-1:cds;Parent=vitri10g01310-mRNA-1
chr10_pilon_pilon	maker	exon	2353534	2354183	.	+	.	ID=vitri10g01310-mRNA-1:exon:566;Parent=vitri10g01310-mRNA-1
chr10_pilon_pilon	maker	three_prime_UTR	2353870	2354183	.	+	.	ID=vitri10g01310-mRNA-1:three_prime_utr;Parent=vitri10g01310-mRNA-1
###
chr10_pilon_pilon	maker	gene	2354677	2355225	.	-	.	ID=vitri10g01320;Name=vitri10g01320;Note=Similar to ICMTB: Protein-S-isoprenylcysteine O-methyltransferase B (Arabidopsis thaliana OX%3D3702);Dbxref=Gene3D:G3DSA:1.20.120.1630,InterPro:IPR007269,InterPro:IPR025770,PANTHER:PTHR12714,PANTHER:PTHR12714:SF9,Pfam:PF04140,ProSiteProfiles:PS51564;Ontology_term=GO:0004671,GO:0005783,GO:0006481,GO:0016021
chr10_pilon_pilon	maker	mRNA	2354677	2355225	.	-	.	ID=vitri10g01320-mRNA-1;Parent=vitri10g01320;Name=vitri10g01320-mRNA-1;_AED=0.18;_eAED=0.18;_QI=0|-1|0|1|-1|1|1|0|182;Note=Similar to ICMTB: Protein-S-isoprenylcysteine O-methyltransferase B (Arabidopsis thaliana OX%3D3702);Dbxref=Gene3D:G3DSA:1.20.120.1630,InterPro:IPR007269,InterPro:IPR025770,PANTHER:PTHR12714,PANTHER:PTHR12714:SF9,Pfam:PF04140,ProSiteProfiles:PS51564;Ontology_term=GO:0004671,GO:0005783,GO:0006481,GO:0016021
chr10_pilon_pilon	maker	exon	2354677	2355225	.	-	.	ID=vitri10g01320-mRNA-1:exon:590;Parent=vitri10g01320-mRNA-1
chr10_pilon_pilon	maker	CDS	2354677	2355225	.	-	0	ID=vitri10g01320-mRNA-1:cds;Parent=vitri10g01320-mRNA-1
###
chr10_pilon_pilon	maker	gene	2359867	2367722	.	-	.	ID=vitri10g01330;Name=vitri10g01330;Note=Similar to FSD3: Superoxide dismutase [Fe] 3%2C chloroplastic (Arabidopsis thaliana OX%3D3702);Dbxref=Gene3D:G3DSA:1.10.287.990,Gene3D:G3DSA:2.40.500.20,InterPro:IPR001189,InterPro:IPR019831,InterPro:IPR019832,InterPro:IPR019833,InterPro:IPR036314,InterPro:IPR036324,PANTHER:PTHR42769,PANTHER:PTHR42769:SF7,PRINTS:PR01703,Pfam:PF00081,Pfam:PF02777,ProSitePatterns:PS00088,SUPERFAMILY:SSF46609,SUPERFAMILY:SSF54719;Ontology_term=GO:0004784,GO:0006801,GO:0046872,GO:0055114
chr10_pilon_pilon	maker	mRNA	2359867	2367722	.	-	.	ID=vitri10g01330-mRNA-1;Parent=vitri10g01330;Name=vitri10g01330-mRNA-1;_AED=0.08;_eAED=0.08;_QI=0|0.75|0.66|1|0.62|0.77|9|334|372;Note=Similar to FSD3: Superoxide dismutase [Fe] 3%2C chloroplastic (Arabidopsis thaliana OX%3D3702);Dbxref=Gene3D:G3DSA:1.10.287.990,Gene3D:G3DSA:2.40.500.20,InterPro:IPR001189,InterPro:IPR019831,InterPro:IPR019832,InterPro:IPR019833,InterPro:IPR036314,InterPro:IPR036324,PANTHER:PTHR42769,PANTHER:PTHR42769:SF7,PRINTS:PR01703,Pfam:PF00081,Pfam:PF02777,ProSitePatterns:PS00088,SUPERFAMILY:SSF46609,SUPERFAMILY:SSF54719;Ontology_term=GO:0004784,GO:0006801,GO:0046872,GO:0055114
chr10_pilon_pilon	maker	three_prime_UTR	2359867	2360200	.	-	.	ID=vitri10g01330-mRNA-1:three_prime_utr;Parent=vitri10g01330-mRNA-1
chr10_pilon_pilon	maker	exon	2359867	2360326	.	-	.	ID=vitri10g01330-mRNA-1:exon:589;Parent=vitri10g01330-mRNA-1
chr10_pilon_pilon	maker	CDS	2360201	2360326	.	-	0	ID=vitri10g01330-mRNA-1:cds;Parent=vitri10g01330-mRNA-1
chr10_pilon_pilon	maker	exon	2360407	2360430	.	-	.	ID=vitri10g01330-mRNA-1:exon:588;Parent=vitri10g01330-mRNA-1
chr10_pilon_pilon	maker	CDS	2360407	2360430	.	-	0	ID=vitri10g01330-mRNA-1:cds;Parent=vitri10g01330-mRNA-1
chr10_pilon_pilon	maker	exon	2360528	2360554	.	-	.	ID=vitri10g01330-mRNA-1:exon:587;Parent=vitri10g01330-mRNA-1
chr10_pilon_pilon	maker	CDS	2360528	2360554	.	-	0	ID=vitri10g01330-mRNA-1:cds;Parent=vitri10g01330-mRNA-1
chr10_pilon_pilon	maker	exon	2360635	2360708	.	-	.	ID=vitri10g01330-mRNA-1:exon:586;Parent=vitri10g01330-mRNA-1
chr10_pilon_pilon	maker	CDS	2360635	2360708	.	-	2	ID=vitri10g01330-mRNA-1:cds;Parent=vitri10g01330-mRNA-1
chr10_pilon_pilon	maker	exon	2362164	2362368	.	-	.	ID=vitri10g01330-mRNA-1:exon:585;Parent=vitri10g01330-mRNA-1
chr10_pilon_pilon	maker	CDS	2362164	2362368	.	-	0	ID=vitri10g01330-mRNA-1:cds;Parent=vitri10g01330-mRNA-1
chr10_pilon_pilon	maker	exon	2363856	2364047	.	-	.	ID=vitri10g01330-mRNA-1:exon:584;Parent=vitri10g01330-mRNA-1
chr10_pilon_pilon	maker	CDS	2363856	2364047	.	-	0	ID=vitri10g01330-mRNA-1:cds;Parent=vitri10g01330-mRNA-1
chr10_pilon_pilon	maker	exon	2364863	2364946	.	-	.	ID=vitri10g01330-mRNA-1:exon:583;Parent=vitri10g01330-mRNA-1
chr10_pilon_pilon	maker	CDS	2364863	2364946	.	-	0	ID=vitri10g01330-mRNA-1:cds;Parent=vitri10g01330-mRNA-1
chr10_pilon_pilon	maker	exon	2367060	2367219	.	-	.	ID=vitri10g01330-mRNA-1:exon:582;Parent=vitri10g01330-mRNA-1
chr10_pilon_pilon	maker	CDS	2367060	2367219	.	-	1	ID=vitri10g01330-mRNA-1:cds;Parent=vitri10g01330-mRNA-1
chr10_pilon_pilon	maker	exon	2367496	2367722	.	-	.	ID=vitri10g01330-mRNA-1:exon:581;Parent=vitri10g01330-mRNA-1
chr10_pilon_pilon	maker	CDS	2367496	2367722	.	-	0	ID=vitri10g01330-mRNA-1:cds;Parent=vitri10g01330-mRNA-1
###
chr10_pilon_pilon	maker	gene	2398318	2404560	.	-	.	ID=vitri10g01340;Name=vitri10g01340;Note=Protein of unknown function;Dbxref=PANTHER:PTHR32183,PANTHER:PTHR32183:SF3
chr10_pilon_pilon	maker	mRNA	2398318	2404560	.	-	.	ID=vitri10g01340-mRNA-1;Parent=vitri10g01340;Name=vitri10g01340-mRNA-1;_AED=0.17;_eAED=0.17;_QI=0|0.6|0.33|1|0.6|0.33|6|0|282;Note=Protein of unknown function;Dbxref=PANTHER:PTHR32183,PANTHER:PTHR32183:SF3
chr10_pilon_pilon	maker	exon	2398318	2398429	.	-	.	ID=vitri10g01340-mRNA-1:exon:429;Parent=vitri10g01340-mRNA-1
chr10_pilon_pilon	maker	CDS	2398318	2398429	.	-	1	ID=vitri10g01340-mRNA-1:cds;Parent=vitri10g01340-mRNA-1
chr10_pilon_pilon	maker	exon	2399012	2399070	.	-	.	ID=vitri10g01340-mRNA-1:exon:430;Parent=vitri10g01340-mRNA-1
chr10_pilon_pilon	maker	CDS	2399012	2399070	.	-	0	ID=vitri10g01340-mRNA-1:cds;Parent=vitri10g01340-mRNA-1
chr10_pilon_pilon	maker	exon	2400150	2400299	.	-	.	ID=vitri10g01340-mRNA-1:exon:431;Parent=vitri10g01340-mRNA-1
chr10_pilon_pilon	maker	CDS	2400150	2400299	.	-	0	ID=vitri10g01340-mRNA-1:cds;Parent=vitri10g01340-mRNA-1
chr10_pilon_pilon	maker	exon	2400480	2400587	.	-	.	ID=vitri10g01340-mRNA-1:exon:432;Parent=vitri10g01340-mRNA-1
chr10_pilon_pilon	maker	CDS	2400480	2400587	.	-	0	ID=vitri10g01340-mRNA-1:cds;Parent=vitri10g01340-mRNA-1
chr10_pilon_pilon	maker	exon	2401141	2401335	.	-	.	ID=vitri10g01340-mRNA-1:exon:433;Parent=vitri10g01340-mRNA-1
chr10_pilon_pilon	maker	CDS	2401141	2401335	.	-	0	ID=vitri10g01340-mRNA-1:cds;Parent=vitri10g01340-mRNA-1
chr10_pilon_pilon	maker	exon	2404339	2404560	.	-	.	ID=vitri10g01340-mRNA-1:exon:434;Parent=vitri10g01340-mRNA-1
chr10_pilon_pilon	maker	CDS	2404339	2404560	.	-	0	ID=vitri10g01340-mRNA-1:cds;Parent=vitri10g01340-mRNA-1
###
chr10_pilon_pilon	maker	gene	2406434	2412025	.	+	.	ID=vitri10g01350;Name=vitri10g01350;Note=Protein of unknown function;Dbxref=MobiDBLite:mobidb-lite
chr10_pilon_pilon	maker	mRNA	2406434	2412025	.	+	.	ID=vitri10g01350-mRNA-1;Parent=vitri10g01350;Name=vitri10g01350-mRNA-1;_AED=0.28;_eAED=0.28;_QI=0|0|0|0.33|1|1|3|0|195;Note=Protein of unknown function;Dbxref=MobiDBLite:mobidb-lite
chr10_pilon_pilon	maker	exon	2406434	2406542	.	+	.	ID=vitri10g01350-mRNA-1:exon:401;Parent=vitri10g01350-mRNA-1
chr10_pilon_pilon	maker	CDS	2406434	2406542	.	+	0	ID=vitri10g01350-mRNA-1:cds;Parent=vitri10g01350-mRNA-1
chr10_pilon_pilon	maker	exon	2406979	2407451	.	+	.	ID=vitri10g01350-mRNA-1:exon:402;Parent=vitri10g01350-mRNA-1
chr10_pilon_pilon	maker	CDS	2406979	2407451	.	+	2	ID=vitri10g01350-mRNA-1:cds;Parent=vitri10g01350-mRNA-1
chr10_pilon_pilon	maker	exon	2412020	2412025	.	+	.	ID=vitri10g01350-mRNA-1:exon:403;Parent=vitri10g01350-mRNA-1
chr10_pilon_pilon	maker	CDS	2412020	2412025	.	+	0	ID=vitri10g01350-mRNA-1:cds;Parent=vitri10g01350-mRNA-1
###
chr10_pilon_pilon	maker	gene	2407264	2413902	.	-	.	ID=vitri10g01360;Name=vitri10g01360;Note=Protein of unknown function;Dbxref=MobiDBLite:mobidb-lite
chr10_pilon_pilon	maker	mRNA	2407264	2413902	.	-	.	ID=vitri10g01360-mRNA-1;Parent=vitri10g01360;Name=vitri10g01360-mRNA-1;_AED=0.49;_eAED=0.49;_QI=0|0|0|0.5|1|1|2|0|65;Note=Protein of unknown function;Dbxref=MobiDBLite:mobidb-lite
chr10_pilon_pilon	maker	exon	2407264	2407440	.	-	.	ID=vitri10g01360-mRNA-1:exon:436;Parent=vitri10g01360-mRNA-1
chr10_pilon_pilon	maker	CDS	2407264	2407440	.	-	0	ID=vitri10g01360-mRNA-1:cds;Parent=vitri10g01360-mRNA-1
chr10_pilon_pilon	maker	exon	2413882	2413902	.	-	.	ID=vitri10g01360-mRNA-1:exon:437;Parent=vitri10g01360-mRNA-1
chr10_pilon_pilon	maker	CDS	2413882	2413902	.	-	0	ID=vitri10g01360-mRNA-1:cds;Parent=vitri10g01360-mRNA-1
###
chr10_pilon_pilon	maker	gene	2416308	2427649	.	+	.	ID=vitri10g01370;Name=vitri10g01370;Note=Similar to SSL10: Protein STRICTOSIDINE SYNTHASE-LIKE 10 (Arabidopsis thaliana OX%3D3702);Dbxref=Gene3D:G3DSA:2.120.10.30,InterPro:IPR004141,InterPro:IPR011042,InterPro:IPR018119,PANTHER:PTHR10426,PANTHER:PTHR10426:SF33,Pfam:PF03088,SUPERFAMILY:SSF63829;Ontology_term=GO:0009058,GO:0016844
chr10_pilon_pilon	maker	mRNA	2416308	2427649	.	+	.	ID=vitri10g01370-mRNA-1;Parent=vitri10g01370;Name=vitri10g01370-mRNA-1;_AED=0.26;_eAED=0.28;_QI=0|0|0|1|0.57|0.5|8|0|555;Note=Similar to SSL10: Protein STRICTOSIDINE SYNTHASE-LIKE 10 (Arabidopsis thaliana OX%3D3702);Dbxref=Gene3D:G3DSA:2.120.10.30,InterPro:IPR004141,InterPro:IPR011042,InterPro:IPR018119,PANTHER:PTHR10426,PANTHER:PTHR10426:SF33,Pfam:PF03088,SUPERFAMILY:SSF63829;Ontology_term=GO:0009058,GO:0016844
chr10_pilon_pilon	maker	exon	2416308	2416310	.	+	.	ID=vitri10g01370-mRNA-1:exon:404;Parent=vitri10g01370-mRNA-1
chr10_pilon_pilon	maker	CDS	2416308	2416310	.	+	0	ID=vitri10g01370-mRNA-1:cds;Parent=vitri10g01370-mRNA-1
chr10_pilon_pilon	maker	exon	2422370	2422668	.	+	.	ID=vitri10g01370-mRNA-1:exon:405;Parent=vitri10g01370-mRNA-1
chr10_pilon_pilon	maker	CDS	2422370	2422668	.	+	0	ID=vitri10g01370-mRNA-1:cds;Parent=vitri10g01370-mRNA-1
chr10_pilon_pilon	maker	exon	2422935	2423204	.	+	.	ID=vitri10g01370-mRNA-1:exon:406;Parent=vitri10g01370-mRNA-1
chr10_pilon_pilon	maker	CDS	2422935	2423204	.	+	1	ID=vitri10g01370-mRNA-1:cds;Parent=vitri10g01370-mRNA-1
chr10_pilon_pilon	maker	exon	2423311	2423501	.	+	.	ID=vitri10g01370-mRNA-1:exon:407;Parent=vitri10g01370-mRNA-1
chr10_pilon_pilon	maker	CDS	2423311	2423501	.	+	1	ID=vitri10g01370-mRNA-1:cds;Parent=vitri10g01370-mRNA-1
chr10_pilon_pilon	maker	exon	2425027	2425090	.	+	.	ID=vitri10g01370-mRNA-1:exon:408;Parent=vitri10g01370-mRNA-1
chr10_pilon_pilon	maker	CDS	2425027	2425090	.	+	2	ID=vitri10g01370-mRNA-1:cds;Parent=vitri10g01370-mRNA-1
chr10_pilon_pilon	maker	exon	2426438	2426590	.	+	.	ID=vitri10g01370-mRNA-1:exon:409;Parent=vitri10g01370-mRNA-1
chr10_pilon_pilon	maker	CDS	2426438	2426590	.	+	1	ID=vitri10g01370-mRNA-1:cds;Parent=vitri10g01370-mRNA-1
chr10_pilon_pilon	maker	exon	2426858	2427127	.	+	.	ID=vitri10g01370-mRNA-1:exon:410;Parent=vitri10g01370-mRNA-1
chr10_pilon_pilon	maker	CDS	2426858	2427127	.	+	1	ID=vitri10g01370-mRNA-1:cds;Parent=vitri10g01370-mRNA-1
chr10_pilon_pilon	maker	exon	2427232	2427649	.	+	.	ID=vitri10g01370-mRNA-1:exon:411;Parent=vitri10g01370-mRNA-1
chr10_pilon_pilon	maker	CDS	2427232	2427649	.	+	1	ID=vitri10g01370-mRNA-1:cds;Parent=vitri10g01370-mRNA-1
###
chr10_pilon_pilon	maker	gene	2432124	2436792	.	+	.	ID=vitri10g01380;Name=vitri10g01380;Note=Protein of unknown function;Dbxref=Coils:Coil,MobiDBLite:mobidb-lite
chr10_pilon_pilon	maker	mRNA	2432124	2436651	.	+	.	ID=vitri10g01380-mRNA-3;Parent=vitri10g01380;Name=vitri10g01380-mRNA-3;_AED=0.30;_eAED=0.30;_QI=94|0|0.5|1|0|0|2|0|119;Note=Protein of unknown function;Dbxref=Coils:Coil,MobiDBLite:mobidb-lite
chr10_pilon_pilon	maker	five_prime_UTR	2432124	2432217	.	+	.	ID=vitri10g01380-mRNA-3:five_prime_utr;Parent=vitri10g01380-mRNA-3
chr10_pilon_pilon	maker	exon	2432124	2432275	.	+	.	ID=vitri10g01380-mRNA-3:exon:416;Parent=vitri10g01380-mRNA-3
chr10_pilon_pilon	maker	CDS	2432218	2432275	.	+	0	ID=vitri10g01380-mRNA-3:cds;Parent=vitri10g01380-mRNA-3
chr10_pilon_pilon	maker	exon	2436350	2436651	.	+	.	ID=vitri10g01380-mRNA-3:exon:417;Parent=vitri10g01380-mRNA-3
chr10_pilon_pilon	maker	CDS	2436350	2436651	.	+	2	ID=vitri10g01380-mRNA-3:cds;Parent=vitri10g01380-mRNA-3
chr10_pilon_pilon	maker	mRNA	2432218	2436789	.	+	.	ID=vitri10g01380-mRNA-2;Parent=vitri10g01380;Name=vitri10g01380-mRNA-2;_AED=0.24;_eAED=0.31;_QI=0|1|0.5|1|0|0|2|138|149;Note=Protein of unknown function;Dbxref=Coils:Coil,MobiDBLite:mobidb-lite
chr10_pilon_pilon	maker	CDS	2432218	2432340	.	+	0	ID=vitri10g01380-mRNA-2:cds;Parent=vitri10g01380-mRNA-2
chr10_pilon_pilon	maker	CDS	2436325	2436651	.	+	0	ID=vitri10g01380-mRNA-2:cds;Parent=vitri10g01380-mRNA-2
chr10_pilon_pilon	maker	exon	2436325	2436789	.	+	.	ID=vitri10g01380-mRNA-2:exon:415;Parent=vitri10g01380-mRNA-2
chr10_pilon_pilon	maker	three_prime_UTR	2436652	2436789	.	+	.	ID=vitri10g01380-mRNA-2:three_prime_utr;Parent=vitri10g01380-mRNA-2
chr10_pilon_pilon	maker	mRNA	2432218	2436792	.	+	.	ID=vitri10g01380-mRNA-1;Parent=vitri10g01380;Name=vitri10g01380-mRNA-1;_AED=0.21;_eAED=0.29;_QI=0|0.5|0.33|1|0|0|3|141|166;Note=Protein of unknown function;Dbxref=Coils:Coil,MobiDBLite:mobidb-lite
chr10_pilon_pilon	maker	exon	2432218	2432340	.	+	.	ID=vitri10g01380-mRNA-1:exon:412;Parent=vitri10g01380-mRNA-2,vitri10g01380-mRNA-1
chr10_pilon_pilon	maker	CDS	2432218	2432340	.	+	0	ID=vitri10g01380-mRNA-1:cds;Parent=vitri10g01380-mRNA-1
chr10_pilon_pilon	maker	exon	2434534	2434584	.	+	.	ID=vitri10g01380-mRNA-1:exon:413;Parent=vitri10g01380-mRNA-1
chr10_pilon_pilon	maker	CDS	2434534	2434584	.	+	0	ID=vitri10g01380-mRNA-1:cds;Parent=vitri10g01380-mRNA-1
chr10_pilon_pilon	maker	CDS	2436325	2436651	.	+	0	ID=vitri10g01380-mRNA-1:cds;Parent=vitri10g01380-mRNA-1
chr10_pilon_pilon	maker	exon	2436325	2436792	.	+	.	ID=vitri10g01380-mRNA-1:exon:414;Parent=vitri10g01380-mRNA-1
chr10_pilon_pilon	maker	three_prime_UTR	2436652	2436792	.	+	.	ID=vitri10g01380-mRNA-1:three_prime_utr;Parent=vitri10g01380-mRNA-1
###
chr10_pilon_pilon	maker	gene	2442274	2443544	.	+	.	ID=vitri10g01390;Name=vitri10g01390;Note=Similar to PAC1: Proteasome subunit alpha type-4 (Spinacia oleracea OX%3D3562);Dbxref=Gene3D:G3DSA:3.60.20.10,InterPro:IPR000426,InterPro:IPR001353,InterPro:IPR023332,InterPro:IPR029055,InterPro:IPR034647,PANTHER:PTHR11599,PANTHER:PTHR11599:SF13,Pfam:PF00227,Pfam:PF10584,ProSitePatterns:PS00388,ProSiteProfiles:PS51475,SMART:SM00948,SUPERFAMILY:SSF56235;Ontology_term=GO:0004175,GO:0004298,GO:0005839,GO:0006511,GO:0019773,GO:0051603
chr10_pilon_pilon	maker	mRNA	2442274	2443544	.	+	.	ID=vitri10g01390-mRNA-1;Parent=vitri10g01390;Name=vitri10g01390-mRNA-1;_AED=0.32;_eAED=0.32;_QI=0|0|0|0.5|1|1|2|0|158;Note=Similar to PAC1: Proteasome subunit alpha type-4 (Spinacia oleracea OX%3D3562);Dbxref=Gene3D:G3DSA:3.60.20.10,InterPro:IPR000426,InterPro:IPR001353,InterPro:IPR023332,InterPro:IPR029055,InterPro:IPR034647,PANTHER:PTHR11599,PANTHER:PTHR11599:SF13,Pfam:PF00227,Pfam:PF10584,ProSitePatterns:PS00388,ProSiteProfiles:PS51475,SMART:SM00948,SUPERFAMILY:SSF56235;Ontology_term=GO:0004175,GO:0004298,GO:0005839,GO:0006511,GO:0019773,GO:0051603
chr10_pilon_pilon	maker	exon	2442274	2442742	.	+	.	ID=vitri10g01390-mRNA-1:exon:418;Parent=vitri10g01390-mRNA-1
chr10_pilon_pilon	maker	CDS	2442274	2442742	.	+	0	ID=vitri10g01390-mRNA-1:cds;Parent=vitri10g01390-mRNA-1
chr10_pilon_pilon	maker	exon	2443537	2443544	.	+	.	ID=vitri10g01390-mRNA-1:exon:419;Parent=vitri10g01390-mRNA-1
chr10_pilon_pilon	maker	CDS	2443537	2443544	.	+	2	ID=vitri10g01390-mRNA-1:cds;Parent=vitri10g01390-mRNA-1
###
chr10_pilon_pilon	maker	gene	2452377	2454077	.	+	.	ID=vitri10g01400;Name=vitri10g01400;Note=Similar to PER50: Peroxidase 50 (Arabidopsis thaliana OX%3D3702);Dbxref=CDD:cd00693,Gene3D:G3DSA:1.10.420.10,Gene3D:G3DSA:1.10.520.10,InterPro:IPR000823,InterPro:IPR002016,InterPro:IPR010255,InterPro:IPR019793,InterPro:IPR033905,PANTHER:PTHR31517,PANTHER:PTHR31517:SF18,PRINTS:PR00458,PRINTS:PR00461,Pfam:PF00141,ProSitePatterns:PS00435,ProSiteProfiles:PS50873,SUPERFAMILY:SSF48113;Ontology_term=GO:0004601,GO:0006979,GO:0020037,GO:0042744,GO:0055114
chr10_pilon_pilon	maker	mRNA	2452377	2454077	.	+	.	ID=vitri10g01400-mRNA-1;Parent=vitri10g01400;Name=vitri10g01400-mRNA-1;_AED=0.14;_eAED=0.24;_QI=0|0.5|0.33|1|1|1|3|72|303;Note=Similar to PER50: Peroxidase 50 (Arabidopsis thaliana OX%3D3702);Dbxref=CDD:cd00693,Gene3D:G3DSA:1.10.420.10,Gene3D:G3DSA:1.10.520.10,InterPro:IPR000823,InterPro:IPR002016,InterPro:IPR010255,InterPro:IPR019793,InterPro:IPR033905,PANTHER:PTHR31517,PANTHER:PTHR31517:SF18,PRINTS:PR00458,PRINTS:PR00461,Pfam:PF00141,ProSitePatterns:PS00435,ProSiteProfiles:PS50873,SUPERFAMILY:SSF48113;Ontology_term=GO:0004601,GO:0006979,GO:0020037,GO:0042744,GO:0055114
chr10_pilon_pilon	maker	exon	2452377	2452612	.	+	.	ID=vitri10g01400-mRNA-1:exon:398;Parent=vitri10g01400-mRNA-1
chr10_pilon_pilon	maker	CDS	2452377	2452612	.	+	0	ID=vitri10g01400-mRNA-1:cds;Parent=vitri10g01400-mRNA-1
chr10_pilon_pilon	maker	exon	2453072	2453168	.	+	.	ID=vitri10g01400-mRNA-1:exon:399;Parent=vitri10g01400-mRNA-1
chr10_pilon_pilon	maker	CDS	2453072	2453168	.	+	1	ID=vitri10g01400-mRNA-1:cds;Parent=vitri10g01400-mRNA-1
chr10_pilon_pilon	maker	CDS	2453427	2454005	.	+	0	ID=vitri10g01400-mRNA-1:cds;Parent=vitri10g01400-mRNA-1
chr10_pilon_pilon	maker	exon	2453427	2454077	.	+	.	ID=vitri10g01400-mRNA-1:exon:400;Parent=vitri10g01400-mRNA-1
chr10_pilon_pilon	maker	three_prime_UTR	2454006	2454077	.	+	.	ID=vitri10g01400-mRNA-1:three_prime_utr;Parent=vitri10g01400-mRNA-1
###
chr10_pilon_pilon	maker	gene	2454574	2455122	.	-	.	ID=vitri10g01410;Name=vitri10g01410;Note=Similar to ICMTB: Protein-S-isoprenylcysteine O-methyltransferase B (Arabidopsis thaliana OX%3D3702);Dbxref=Gene3D:G3DSA:1.20.120.1630,InterPro:IPR007269,InterPro:IPR025770,PANTHER:PTHR12714,PANTHER:PTHR12714:SF9,Pfam:PF04140,ProSiteProfiles:PS51564;Ontology_term=GO:0004671,GO:0005783,GO:0006481,GO:0016021
chr10_pilon_pilon	maker	mRNA	2454574	2455122	.	-	.	ID=vitri10g01410-mRNA-1;Parent=vitri10g01410;Name=vitri10g01410-mRNA-1;_AED=0.18;_eAED=0.18;_QI=0|-1|0|1|-1|1|1|0|182;Note=Similar to ICMTB: Protein-S-isoprenylcysteine O-methyltransferase B (Arabidopsis thaliana OX%3D3702);Dbxref=Gene3D:G3DSA:1.20.120.1630,InterPro:IPR007269,InterPro:IPR025770,PANTHER:PTHR12714,PANTHER:PTHR12714:SF9,Pfam:PF04140,ProSiteProfiles:PS51564;Ontology_term=GO:0004671,GO:0005783,GO:0006481,GO:0016021
chr10_pilon_pilon	maker	exon	2454574	2455122	.	-	.	ID=vitri10g01410-mRNA-1:exon:435;Parent=vitri10g01410-mRNA-1
chr10_pilon_pilon	maker	CDS	2454574	2455122	.	-	0	ID=vitri10g01410-mRNA-1:cds;Parent=vitri10g01410-mRNA-1
###
chr10_pilon_pilon	maker	gene	2463987	2471688	.	-	.	ID=vitri10g01420;Name=vitri10g01420;Note=Similar to FSD3: Superoxide dismutase [Fe] 3%2C chloroplastic (Arabidopsis thaliana OX%3D3702);Dbxref=Gene3D:G3DSA:1.10.287.990,Gene3D:G3DSA:2.40.500.20,InterPro:IPR001189,InterPro:IPR019831,InterPro:IPR019832,InterPro:IPR019833,InterPro:IPR036314,InterPro:IPR036324,PANTHER:PTHR42769,PANTHER:PTHR42769:SF7,PRINTS:PR01703,Pfam:PF00081,Pfam:PF02777,ProSitePatterns:PS00088,SUPERFAMILY:SSF46609,SUPERFAMILY:SSF54719;Ontology_term=GO:0004784,GO:0006801,GO:0046872,GO:0055114
chr10_pilon_pilon	maker	mRNA	2463987	2471688	.	-	.	ID=vitri10g01420-mRNA-1;Parent=vitri10g01420;Name=vitri10g01420-mRNA-1;_AED=0.11;_eAED=0.11;_QI=0|0.57|0.62|1|0.57|0.5|8|332|274;Note=Similar to FSD3: Superoxide dismutase [Fe] 3%2C chloroplastic (Arabidopsis thaliana OX%3D3702);Dbxref=Gene3D:G3DSA:1.10.287.990,Gene3D:G3DSA:2.40.500.20,InterPro:IPR001189,InterPro:IPR019831,InterPro:IPR019832,InterPro:IPR019833,InterPro:IPR036314,InterPro:IPR036324,PANTHER:PTHR42769,PANTHER:PTHR42769:SF7,PRINTS:PR01703,Pfam:PF00081,Pfam:PF02777,ProSitePatterns:PS00088,SUPERFAMILY:SSF46609,SUPERFAMILY:SSF54719;Ontology_term=GO:0004784,GO:0006801,GO:0046872,GO:0055114
chr10_pilon_pilon	maker	three_prime_UTR	2463987	2464318	.	-	.	ID=vitri10g01420-mRNA-1:three_prime_utr;Parent=vitri10g01420-mRNA-1
chr10_pilon_pilon	maker	CDS	2464319	2464444	.	-	0	ID=vitri10g01420-mRNA-1:cds;Parent=vitri10g01420-mRNA-1
chr10_pilon_pilon	maker	CDS	2464525	2464548	.	-	0	ID=vitri10g01420-mRNA-1:cds;Parent=vitri10g01420-mRNA-1
chr10_pilon_pilon	maker	exon	2464639	2464665	.	-	.	ID=vitri10g01420-mRNA-1:exon:425;Parent=vitri10g01420-mRNA-1
chr10_pilon_pilon	maker	CDS	2464639	2464665	.	-	0	ID=vitri10g01420-mRNA-1:cds;Parent=vitri10g01420-mRNA-1
chr10_pilon_pilon	maker	CDS	2464746	2464819	.	-	2	ID=vitri10g01420-mRNA-1:cds;Parent=vitri10g01420-mRNA-1
chr10_pilon_pilon	maker	CDS	2466335	2466452	.	-	0	ID=vitri10g01420-mRNA-1:cds;Parent=vitri10g01420-mRNA-1
chr10_pilon_pilon	maker	CDS	2467958	2468146	.	-	0	ID=vitri10g01420-mRNA-1:cds;Parent=vitri10g01420-mRNA-1
chr10_pilon_pilon	maker	CDS	2471127	2471259	.	-	1	ID=vitri10g01420-mRNA-1:cds;Parent=vitri10g01420-mRNA-1
chr10_pilon_pilon	maker	CDS	2471555	2471688	.	-	0	ID=vitri10g01420-mRNA-1:cds;Parent=vitri10g01420-mRNA-1
chr10_pilon_pilon	maker	mRNA	2463987	2471688	.	-	.	ID=vitri10g01420-mRNA-2;Parent=vitri10g01420;Name=vitri10g01420-mRNA-2;_AED=0.13;_eAED=0.10;_QI=0|0.5|0.42|1|0.66|0.57|7|332|304;Note=Similar to sodF: Probable superoxide dismutase [Fe] (Bacillus subtilis (strain 168) OX%3D224308);Dbxref=Gene3D:G3DSA:1.10.287.990,Gene3D:G3DSA:2.40.500.20,InterPro:IPR019831,InterPro:IPR019832,InterPro:IPR036314,InterPro:IPR036324,PANTHER:PTHR42769,PANTHER:PTHR42769:SF7,Pfam:PF00081,Pfam:PF02777,SUPERFAMILY:SSF46609,SUPERFAMILY:SSF54719;Ontology_term=GO:0004784,GO:0006801,GO:0046872,GO:0055114
chr10_pilon_pilon	maker	three_prime_UTR	2463987	2464318	.	-	.	ID=vitri10g01420-mRNA-2:three_prime_utr;Parent=vitri10g01420-mRNA-2
chr10_pilon_pilon	maker	CDS	2464319	2464444	.	-	0	ID=vitri10g01420-mRNA-2:cds;Parent=vitri10g01420-mRNA-2
chr10_pilon_pilon	maker	exon	2464525	2464665	.	-	.	ID=vitri10g01420-mRNA-2:exon:428;Parent=vitri10g01420-mRNA-2
chr10_pilon_pilon	maker	CDS	2464525	2464665	.	-	0	ID=vitri10g01420-mRNA-2:cds;Parent=vitri10g01420-mRNA-2
chr10_pilon_pilon	maker	CDS	2464746	2464819	.	-	2	ID=vitri10g01420-mRNA-2:cds;Parent=vitri10g01420-mRNA-2
chr10_pilon_pilon	maker	CDS	2466335	2466452	.	-	0	ID=vitri10g01420-mRNA-2:cds;Parent=vitri10g01420-mRNA-2
chr10_pilon_pilon	maker	CDS	2467958	2468146	.	-	0	ID=vitri10g01420-mRNA-2:cds;Parent=vitri10g01420-mRNA-2
chr10_pilon_pilon	maker	CDS	2471127	2471259	.	-	1	ID=vitri10g01420-mRNA-2:cds;Parent=vitri10g01420-mRNA-2
chr10_pilon_pilon	maker	CDS	2471555	2471688	.	-	0	ID=vitri10g01420-mRNA-2:cds;Parent=vitri10g01420-mRNA-2
chr10_pilon_pilon	maker	mRNA	2463987	2471688	.	-	.	ID=vitri10g01420-mRNA-3;Parent=vitri10g01420;Name=vitri10g01420-mRNA-3;_AED=0.12;_eAED=0.12;_QI=0|0.33|0.57|1|0.5|0.42|7|332|265;Note=Similar to SODB: Superoxide dismutase [Fe]%2C chloroplastic (Glycine max OX%3D3847);Dbxref=Gene3D:G3DSA:1.10.287.990,Gene3D:G3DSA:2.40.500.20,InterPro:IPR019831,InterPro:IPR019832,InterPro:IPR036314,InterPro:IPR036324,PANTHER:PTHR42769,PANTHER:PTHR42769:SF7,Pfam:PF00081,Pfam:PF02777,SUPERFAMILY:SSF46609,SUPERFAMILY:SSF54719;Ontology_term=GO:0004784,GO:0006801,GO:0046872,GO:0055114
chr10_pilon_pilon	maker	three_prime_UTR	2463987	2464318	.	-	.	ID=vitri10g01420-mRNA-3:three_prime_utr;Parent=vitri10g01420-mRNA-3
chr10_pilon_pilon	maker	exon	2463987	2464444	.	-	.	ID=vitri10g01420-mRNA-1:exon:427;Parent=vitri10g01420-mRNA-1,vitri10g01420-mRNA-2,vitri10g01420-mRNA-3
chr10_pilon_pilon	maker	CDS	2464319	2464444	.	-	0	ID=vitri10g01420-mRNA-3:cds;Parent=vitri10g01420-mRNA-3
chr10_pilon_pilon	maker	exon	2464525	2464548	.	-	.	ID=vitri10g01420-mRNA-1:exon:426;Parent=vitri10g01420-mRNA-1,vitri10g01420-mRNA-3
chr10_pilon_pilon	maker	CDS	2464525	2464548	.	-	0	ID=vitri10g01420-mRNA-3:cds;Parent=vitri10g01420-mRNA-3
chr10_pilon_pilon	maker	exon	2464746	2464819	.	-	.	ID=vitri10g01420-mRNA-1:exon:424;Parent=vitri10g01420-mRNA-1,vitri10g01420-mRNA-2,vitri10g01420-mRNA-3
chr10_pilon_pilon	maker	CDS	2464746	2464819	.	-	2	ID=vitri10g01420-mRNA-3:cds;Parent=vitri10g01420-mRNA-3
chr10_pilon_pilon	maker	exon	2466335	2466452	.	-	.	ID=vitri10g01420-mRNA-1:exon:423;Parent=vitri10g01420-mRNA-1,vitri10g01420-mRNA-2,vitri10g01420-mRNA-3
chr10_pilon_pilon	maker	CDS	2466335	2466452	.	-	0	ID=vitri10g01420-mRNA-3:cds;Parent=vitri10g01420-mRNA-3
chr10_pilon_pilon	maker	exon	2467958	2468146	.	-	.	ID=vitri10g01420-mRNA-1:exon:422;Parent=vitri10g01420-mRNA-1,vitri10g01420-mRNA-2,vitri10g01420-mRNA-3
chr10_pilon_pilon	maker	CDS	2467958	2468146	.	-	0	ID=vitri10g01420-mRNA-3:cds;Parent=vitri10g01420-mRNA-3
chr10_pilon_pilon	maker	exon	2471127	2471259	.	-	.	ID=vitri10g01420-mRNA-1:exon:421;Parent=vitri10g01420-mRNA-1,vitri10g01420-mRNA-2,vitri10g01420-mRNA-3
chr10_pilon_pilon	maker	CDS	2471127	2471259	.	-	1	ID=vitri10g01420-mRNA-3:cds;Parent=vitri10g01420-mRNA-3
chr10_pilon_pilon	maker	exon	2471555	2471688	.	-	.	ID=vitri10g01420-mRNA-1:exon:420;Parent=vitri10g01420-mRNA-1,vitri10g01420-mRNA-2,vitri10g01420-mRNA-3
chr10_pilon_pilon	maker	CDS	2471555	2471688	.	-	0	ID=vitri10g01420-mRNA-3:cds;Parent=vitri10g01420-mRNA-3
###
chr10_pilon_pilon	maker	gene	2496020	2496651	.	+	.	ID=vitri10g01430;Name=vitri10g01430;Note=Protein of unknown function
chr10_pilon_pilon	maker	mRNA	2496020	2496651	.	+	.	ID=vitri10g01430-mRNA-1;Parent=vitri10g01430;Name=vitri10g01430-mRNA-1;_AED=0.14;_eAED=0.14;_QI=0|0|0|1|0|0|3|0|137;Note=Protein of unknown function
chr10_pilon_pilon	maker	exon	2496020	2496168	.	+	.	ID=vitri10g01430-mRNA-1:exon:614;Parent=vitri10g01430-mRNA-1
chr10_pilon_pilon	maker	CDS	2496020	2496168	.	+	0	ID=vitri10g01430-mRNA-1:cds;Parent=vitri10g01430-mRNA-1
chr10_pilon_pilon	maker	exon	2496339	2496348	.	+	.	ID=vitri10g01430-mRNA-1:exon:615;Parent=vitri10g01430-mRNA-1
chr10_pilon_pilon	maker	CDS	2496339	2496348	.	+	1	ID=vitri10g01430-mRNA-1:cds;Parent=vitri10g01430-mRNA-1
chr10_pilon_pilon	maker	exon	2496397	2496651	.	+	.	ID=vitri10g01430-mRNA-1:exon:616;Parent=vitri10g01430-mRNA-1
chr10_pilon_pilon	maker	CDS	2496397	2496651	.	+	0	ID=vitri10g01430-mRNA-1:cds;Parent=vitri10g01430-mRNA-1
###
chr10_pilon_pilon	maker	gene	2504432	2510697	.	-	.	ID=vitri10g01440;Name=vitri10g01440;Note=Protein of unknown function;Dbxref=PANTHER:PTHR32183,PANTHER:PTHR32183:SF3,SUPERFAMILY:SSF102405
chr10_pilon_pilon	maker	mRNA	2504432	2510697	.	-	.	ID=vitri10g01440-mRNA-1;Parent=vitri10g01440;Name=vitri10g01440-mRNA-1;_AED=0.17;_eAED=0.17;_QI=0|0.8|0.33|1|0.8|0.83|6|0|292;Note=Protein of unknown function;Dbxref=PANTHER:PTHR32183,PANTHER:PTHR32183:SF3,SUPERFAMILY:SSF102405
chr10_pilon_pilon	maker	exon	2504432	2504567	.	-	.	ID=vitri10g01440-mRNA-1:exon:608;Parent=vitri10g01440-mRNA-1
chr10_pilon_pilon	maker	CDS	2504432	2504567	.	-	1	ID=vitri10g01440-mRNA-1:cds;Parent=vitri10g01440-mRNA-1
chr10_pilon_pilon	maker	exon	2505149	2505207	.	-	.	ID=vitri10g01440-mRNA-1:exon:609;Parent=vitri10g01440-mRNA-1
chr10_pilon_pilon	maker	CDS	2505149	2505207	.	-	0	ID=vitri10g01440-mRNA-1:cds;Parent=vitri10g01440-mRNA-1
chr10_pilon_pilon	maker	exon	2506303	2506452	.	-	.	ID=vitri10g01440-mRNA-1:exon:610;Parent=vitri10g01440-mRNA-1
chr10_pilon_pilon	maker	CDS	2506303	2506452	.	-	0	ID=vitri10g01440-mRNA-1:cds;Parent=vitri10g01440-mRNA-1
chr10_pilon_pilon	maker	exon	2506617	2506733	.	-	.	ID=vitri10g01440-mRNA-1:exon:611;Parent=vitri10g01440-mRNA-1
chr10_pilon_pilon	maker	CDS	2506617	2506733	.	-	0	ID=vitri10g01440-mRNA-1:cds;Parent=vitri10g01440-mRNA-1
chr10_pilon_pilon	maker	exon	2507287	2507481	.	-	.	ID=vitri10g01440-mRNA-1:exon:612;Parent=vitri10g01440-mRNA-1
chr10_pilon_pilon	maker	CDS	2507287	2507481	.	-	0	ID=vitri10g01440-mRNA-1:cds;Parent=vitri10g01440-mRNA-1
chr10_pilon_pilon	maker	exon	2510476	2510697	.	-	.	ID=vitri10g01440-mRNA-1:exon:613;Parent=vitri10g01440-mRNA-1
chr10_pilon_pilon	maker	CDS	2510476	2510697	.	-	0	ID=vitri10g01440-mRNA-1:cds;Parent=vitri10g01440-mRNA-1
###
chr10_pilon_pilon	maker	gene	2540706	2540996	.	-	.	ID=vitri10g01450;Name=vitri10g01450;Note=Protein of unknown function
chr10_pilon_pilon	maker	mRNA	2540706	2540996	.	-	.	ID=vitri10g01450-mRNA-1;Parent=vitri10g01450;Name=vitri10g01450-mRNA-1;_AED=0.14;_eAED=0.32;_QI=38|0|0|1|0|0|2|0|76;Note=Protein of unknown function
chr10_pilon_pilon	maker	exon	2540706	2540856	.	-	.	ID=vitri10g01450-mRNA-1:exon:617;Parent=vitri10g01450-mRNA-1
chr10_pilon_pilon	maker	CDS	2540706	2540856	.	-	1	ID=vitri10g01450-mRNA-1:cds;Parent=vitri10g01450-mRNA-1
chr10_pilon_pilon	maker	CDS	2540882	2540958	.	-	0	ID=vitri10g01450-mRNA-1:cds;Parent=vitri10g01450-mRNA-1
chr10_pilon_pilon	maker	exon	2540882	2540996	.	-	.	ID=vitri10g01450-mRNA-1:exon:618;Parent=vitri10g01450-mRNA-1
chr10_pilon_pilon	maker	five_prime_UTR	2540959	2540996	.	-	.	ID=vitri10g01450-mRNA-1:five_prime_utr;Parent=vitri10g01450-mRNA-1
###
chr10_pilon_pilon	maker	gene	2555144	2559571	.	-	.	ID=vitri10g01460;Name=vitri10g01460;Note=Similar to PCMP-E88: Pentatricopeptide repeat-containing protein At3g09040%2C mitochondrial (Arabidopsis thaliana OX%3D3702);Dbxref=Gene3D:G3DSA:1.25.40.10,InterPro:IPR002885,InterPro:IPR011990,PANTHER:PTHR24015,PANTHER:PTHR24015:SF1643,Pfam:PF01535,Pfam:PF13041,ProSiteProfiles:PS51375,TIGRFAM:TIGR00756;Ontology_term=GO:0005515
chr10_pilon_pilon	maker	mRNA	2555144	2559571	.	-	.	ID=vitri10g01460-mRNA-1;Parent=vitri10g01460;Name=vitri10g01460-mRNA-1;_AED=0.05;_eAED=0.05;_QI=0|0|0|1|1|1|2|0|825;Note=Similar to PCMP-E88: Pentatricopeptide repeat-containing protein At3g09040%2C mitochondrial (Arabidopsis thaliana OX%3D3702);Dbxref=Gene3D:G3DSA:1.25.40.10,InterPro:IPR002885,InterPro:IPR011990,PANTHER:PTHR24015,PANTHER:PTHR24015:SF1643,Pfam:PF01535,Pfam:PF13041,ProSiteProfiles:PS51375,TIGRFAM:TIGR00756;Ontology_term=GO:0005515
chr10_pilon_pilon	maker	exon	2555144	2555247	.	-	.	ID=vitri10g01460-mRNA-1:exon:606;Parent=vitri10g01460-mRNA-1
chr10_pilon_pilon	maker	CDS	2555144	2555247	.	-	2	ID=vitri10g01460-mRNA-1:cds;Parent=vitri10g01460-mRNA-1
chr10_pilon_pilon	maker	exon	2557198	2559571	.	-	.	ID=vitri10g01460-mRNA-1:exon:607;Parent=vitri10g01460-mRNA-1
chr10_pilon_pilon	maker	CDS	2557198	2559571	.	-	0	ID=vitri10g01460-mRNA-1:cds;Parent=vitri10g01460-mRNA-1
###
chr10_pilon_pilon	maker	gene	2599201	2627004	.	-	.	ID=vitri10g01470;Name=vitri10g01470;Note=Similar to PYRD: Dihydroorotate dehydrogenase (quinone)%2C mitochondrial (Arabidopsis thaliana OX%3D3702);Dbxref=CDD:cd04738,Gene3D:G3DSA:3.20.20.70,InterPro:IPR001295,InterPro:IPR005719,InterPro:IPR005720,InterPro:IPR013785,MobiDBLite:mobidb-lite,PANTHER:PTHR43517,Pfam:PF01180,ProSitePatterns:PS00911,ProSitePatterns:PS00912,SUPERFAMILY:SSF51395,TIGRFAM:TIGR01036;Ontology_term=GO:0003824,GO:0004152,GO:0005737,GO:0006207,GO:0016020,GO:0016627,GO:0055114
chr10_pilon_pilon	maker	mRNA	2599201	2627004	.	-	.	ID=vitri10g01470-mRNA-1;Parent=vitri10g01470;Name=vitri10g01470-mRNA-1;_AED=0.01;_eAED=0.01;_QI=370|0.9|0.90|1|0.9|0.90|11|380|498;Note=Similar to PYRD: Dihydroorotate dehydrogenase (quinone)%2C mitochondrial (Arabidopsis thaliana OX%3D3702);Dbxref=CDD:cd04738,Gene3D:G3DSA:3.20.20.70,InterPro:IPR001295,InterPro:IPR005719,InterPro:IPR005720,InterPro:IPR013785,MobiDBLite:mobidb-lite,PANTHER:PTHR43517,Pfam:PF01180,ProSitePatterns:PS00911,ProSitePatterns:PS00912,SUPERFAMILY:SSF51395,TIGRFAM:TIGR01036;Ontology_term=GO:0003824,GO:0004152,GO:0005737,GO:0006207,GO:0016020,GO:0016627,GO:0055114
chr10_pilon_pilon	maker	three_prime_UTR	2599201	2599580	.	-	.	ID=vitri10g01470-mRNA-1:three_prime_utr;Parent=vitri10g01470-mRNA-1
chr10_pilon_pilon	maker	exon	2599201	2599655	.	-	.	ID=vitri10g01470-mRNA-1:exon:23;Parent=vitri10g01470-mRNA-1
chr10_pilon_pilon	maker	CDS	2599581	2599655	.	-	0	ID=vitri10g01470-mRNA-1:cds;Parent=vitri10g01470-mRNA-1
chr10_pilon_pilon	maker	exon	2607263	2607362	.	-	.	ID=vitri10g01470-mRNA-1:exon:22;Parent=vitri10g01470-mRNA-1
chr10_pilon_pilon	maker	CDS	2607263	2607362	.	-	1	ID=vitri10g01470-mRNA-1:cds;Parent=vitri10g01470-mRNA-1
chr10_pilon_pilon	maker	exon	2607484	2607521	.	-	.	ID=vitri10g01470-mRNA-1:exon:21;Parent=vitri10g01470-mRNA-1
chr10_pilon_pilon	maker	CDS	2607484	2607521	.	-	0	ID=vitri10g01470-mRNA-1:cds;Parent=vitri10g01470-mRNA-1
chr10_pilon_pilon	maker	exon	2611537	2611674	.	-	.	ID=vitri10g01470-mRNA-1:exon:20;Parent=vitri10g01470-mRNA-1
chr10_pilon_pilon	maker	CDS	2611537	2611674	.	-	0	ID=vitri10g01470-mRNA-1:cds;Parent=vitri10g01470-mRNA-1
chr10_pilon_pilon	maker	exon	2611933	2611962	.	-	.	ID=vitri10g01470-mRNA-1:exon:19;Parent=vitri10g01470-mRNA-1
chr10_pilon_pilon	maker	CDS	2611933	2611962	.	-	0	ID=vitri10g01470-mRNA-1:cds;Parent=vitri10g01470-mRNA-1
chr10_pilon_pilon	maker	exon	2612087	2612194	.	-	.	ID=vitri10g01470-mRNA-1:exon:18;Parent=vitri10g01470-mRNA-1
chr10_pilon_pilon	maker	CDS	2612087	2612194	.	-	0	ID=vitri10g01470-mRNA-1:cds;Parent=vitri10g01470-mRNA-1
chr10_pilon_pilon	maker	exon	2612283	2612363	.	-	.	ID=vitri10g01470-mRNA-1:exon:17;Parent=vitri10g01470-mRNA-1
chr10_pilon_pilon	maker	CDS	2612283	2612363	.	-	0	ID=vitri10g01470-mRNA-1:cds;Parent=vitri10g01470-mRNA-1
chr10_pilon_pilon	maker	exon	2621758	2622127	.	-	.	ID=vitri10g01470-mRNA-1:exon:16;Parent=vitri10g01470-mRNA-1
chr10_pilon_pilon	maker	CDS	2621758	2622127	.	-	1	ID=vitri10g01470-mRNA-1:cds;Parent=vitri10g01470-mRNA-1
chr10_pilon_pilon	maker	exon	2622241	2622564	.	-	.	ID=vitri10g01470-mRNA-1:exon:15;Parent=vitri10g01470-mRNA-1
chr10_pilon_pilon	maker	CDS	2622241	2622564	.	-	1	ID=vitri10g01470-mRNA-1:cds;Parent=vitri10g01470-mRNA-1
chr10_pilon_pilon	maker	exon	2624341	2624423	.	-	.	ID=vitri10g01470-mRNA-1:exon:14;Parent=vitri10g01470-mRNA-1
chr10_pilon_pilon	maker	CDS	2624341	2624423	.	-	0	ID=vitri10g01470-mRNA-1:cds;Parent=vitri10g01470-mRNA-1
chr10_pilon_pilon	maker	CDS	2626485	2626634	.	-	0	ID=vitri10g01470-mRNA-1:cds;Parent=vitri10g01470-mRNA-1
chr10_pilon_pilon	maker	exon	2626485	2627004	.	-	.	ID=vitri10g01470-mRNA-1:exon:13;Parent=vitri10g01470-mRNA-1
chr10_pilon_pilon	maker	five_prime_UTR	2626635	2627004	.	-	.	ID=vitri10g01470-mRNA-1:five_prime_utr;Parent=vitri10g01470-mRNA-1
###
chr10_pilon_pilon	maker	gene	2639523	2641334	.	+	.	ID=vitri10g01480;Name=vitri10g01480;Note=Protein of unknown function;Dbxref=MobiDBLite:mobidb-lite
chr10_pilon_pilon	maker	mRNA	2639523	2641334	.	+	.	ID=vitri10g01480-mRNA-1;Parent=vitri10g01480;Name=vitri10g01480-mRNA-1;_AED=0.45;_eAED=0.46;_QI=0|0|0|0.5|1|1|4|0|190;Note=Protein of unknown function;Dbxref=MobiDBLite:mobidb-lite
chr10_pilon_pilon	maker	exon	2639523	2639537	.	+	.	ID=vitri10g01480-mRNA-1:exon:7;Parent=vitri10g01480-mRNA-1
chr10_pilon_pilon	maker	CDS	2639523	2639537	.	+	0	ID=vitri10g01480-mRNA-1:cds;Parent=vitri10g01480-mRNA-1
chr10_pilon_pilon	maker	exon	2639624	2639707	.	+	.	ID=vitri10g01480-mRNA-1:exon:8;Parent=vitri10g01480-mRNA-1
chr10_pilon_pilon	maker	CDS	2639624	2639707	.	+	0	ID=vitri10g01480-mRNA-1:cds;Parent=vitri10g01480-mRNA-1
chr10_pilon_pilon	maker	exon	2639812	2639879	.	+	.	ID=vitri10g01480-mRNA-1:exon:9;Parent=vitri10g01480-mRNA-1
chr10_pilon_pilon	maker	CDS	2639812	2639879	.	+	0	ID=vitri10g01480-mRNA-1:cds;Parent=vitri10g01480-mRNA-1
chr10_pilon_pilon	maker	exon	2640929	2641334	.	+	.	ID=vitri10g01480-mRNA-1:exon:10;Parent=vitri10g01480-mRNA-1
chr10_pilon_pilon	maker	CDS	2640929	2641334	.	+	1	ID=vitri10g01480-mRNA-1:cds;Parent=vitri10g01480-mRNA-1
###
chr10_pilon_pilon	maker	gene	2654606	2659493	.	+	.	ID=vitri10g01490;Name=vitri10g01490;Note=Similar to At5g23290: Probable prefoldin subunit 5 (Arabidopsis thaliana OX%3D3702);Dbxref=CDD:cd00584,Gene3D:G3DSA:1.10.287.370,InterPro:IPR004127,InterPro:IPR009053,InterPro:IPR011599,PANTHER:PTHR12674,PANTHER:PTHR12674:SF2,Pfam:PF02996,SUPERFAMILY:SSF46579,TIGRFAM:TIGR00293;Ontology_term=GO:0006457,GO:0016272,GO:0051082
chr10_pilon_pilon	maker	mRNA	2654606	2659493	.	+	.	ID=vitri10g01490-mRNA-1;Parent=vitri10g01490;Name=vitri10g01490-mRNA-1;_AED=0.04;_eAED=0.04;_QI=0|0.66|0.5|1|0.33|0.5|4|238|178;Note=Similar to At5g23290: Probable prefoldin subunit 5 (Arabidopsis thaliana OX%3D3702);Dbxref=CDD:cd00584,Gene3D:G3DSA:1.10.287.370,InterPro:IPR004127,InterPro:IPR009053,InterPro:IPR011599,PANTHER:PTHR12674,PANTHER:PTHR12674:SF2,Pfam:PF02996,SUPERFAMILY:SSF46579,TIGRFAM:TIGR00293;Ontology_term=GO:0006457,GO:0016272,GO:0051082
chr10_pilon_pilon	maker	exon	2654606	2654884	.	+	.	ID=vitri10g01490-mRNA-1:exon:0;Parent=vitri10g01490-mRNA-1
chr10_pilon_pilon	maker	CDS	2654606	2654884	.	+	0	ID=vitri10g01490-mRNA-1:cds;Parent=vitri10g01490-mRNA-1
chr10_pilon_pilon	maker	exon	2654898	2654993	.	+	.	ID=vitri10g01490-mRNA-1:exon:1;Parent=vitri10g01490-mRNA-1
chr10_pilon_pilon	maker	CDS	2654898	2654993	.	+	0	ID=vitri10g01490-mRNA-1:cds;Parent=vitri10g01490-mRNA-1
chr10_pilon_pilon	maker	exon	2658708	2658785	.	+	.	ID=vitri10g01490-mRNA-1:exon:2;Parent=vitri10g01490-mRNA-1
chr10_pilon_pilon	maker	CDS	2658708	2658785	.	+	0	ID=vitri10g01490-mRNA-1:cds;Parent=vitri10g01490-mRNA-1
chr10_pilon_pilon	maker	CDS	2659172	2659255	.	+	0	ID=vitri10g01490-mRNA-1:cds;Parent=vitri10g01490-mRNA-1
chr10_pilon_pilon	maker	exon	2659172	2659493	.	+	.	ID=vitri10g01490-mRNA-1:exon:3;Parent=vitri10g01490-mRNA-1
chr10_pilon_pilon	maker	three_prime_UTR	2659256	2659493	.	+	.	ID=vitri10g01490-mRNA-1:three_prime_utr;Parent=vitri10g01490-mRNA-1
###
chr10_pilon_pilon	maker	gene	2669169	2669559	.	+	.	ID=vitri10g01500;Name=vitri10g01500;Note=Protein of unknown function
chr10_pilon_pilon	maker	mRNA	2669169	2669559	.	+	.	ID=vitri10g01500-mRNA-1;Parent=vitri10g01500;Name=vitri10g01500-mRNA-1;_AED=0.26;_eAED=0.26;_QI=0|0|0|0.66|1|1|3|0|93;Note=Protein of unknown function
chr10_pilon_pilon	maker	exon	2669169	2669195	.	+	.	ID=vitri10g01500-mRNA-1:exon:4;Parent=vitri10g01500-mRNA-1
chr10_pilon_pilon	maker	CDS	2669169	2669195	.	+	0	ID=vitri10g01500-mRNA-1:cds;Parent=vitri10g01500-mRNA-1
chr10_pilon_pilon	maker	exon	2669256	2669451	.	+	.	ID=vitri10g01500-mRNA-1:exon:5;Parent=vitri10g01500-mRNA-1
chr10_pilon_pilon	maker	CDS	2669256	2669451	.	+	0	ID=vitri10g01500-mRNA-1:cds;Parent=vitri10g01500-mRNA-1
chr10_pilon_pilon	maker	exon	2669501	2669559	.	+	.	ID=vitri10g01500-mRNA-1:exon:6;Parent=vitri10g01500-mRNA-1
chr10_pilon_pilon	maker	CDS	2669501	2669559	.	+	2	ID=vitri10g01500-mRNA-1:cds;Parent=vitri10g01500-mRNA-1
###
chr10_pilon_pilon	maker	gene	2674118	2676598	.	-	.	ID=vitri10g01510;Name=vitri10g01510;Note=Similar to TCP7: Transcription factor TCP7 (Arabidopsis thaliana OX%3D3702);Dbxref=InterPro:IPR005333,InterPro:IPR017887,MobiDBLite:mobidb-lite,PANTHER:PTHR31072,PANTHER:PTHR31072:SF7,Pfam:PF03634,ProSiteProfiles:PS51369
chr10_pilon_pilon	maker	mRNA	2674118	2676598	.	-	.	ID=vitri10g01510-mRNA-1;Parent=vitri10g01510;Name=vitri10g01510-mRNA-1;_AED=0.10;_eAED=0.10;_QI=0|0|0.5|1|1|1|2|583|259;Note=Similar to TCP7: Transcription factor TCP7 (Arabidopsis thaliana OX%3D3702);Dbxref=InterPro:IPR005333,InterPro:IPR017887,MobiDBLite:mobidb-lite,PANTHER:PTHR31072,PANTHER:PTHR31072:SF7,Pfam:PF03634,ProSiteProfiles:PS51369
chr10_pilon_pilon	maker	three_prime_UTR	2674118	2674700	.	-	.	ID=vitri10g01510-mRNA-1:three_prime_utr;Parent=vitri10g01510-mRNA-1
chr10_pilon_pilon	maker	exon	2674118	2674720	.	-	.	ID=vitri10g01510-mRNA-1:exon:25;Parent=vitri10g01510-mRNA-1
chr10_pilon_pilon	maker	CDS	2674701	2674720	.	-	2	ID=vitri10g01510-mRNA-1:cds;Parent=vitri10g01510-mRNA-1
chr10_pilon_pilon	maker	exon	2675839	2676598	.	-	.	ID=vitri10g01510-mRNA-1:exon:24;Parent=vitri10g01510-mRNA-1
chr10_pilon_pilon	maker	CDS	2675839	2676598	.	-	0	ID=vitri10g01510-mRNA-1:cds;Parent=vitri10g01510-mRNA-1
###
chr10_pilon_pilon	maker	gene	2701617	2713654	.	-	.	ID=vitri10g01520;Name=vitri10g01520;Note=Similar to Eapp: E2F-associated phosphoprotein (Mus musculus OX%3D10090);Dbxref=InterPro:IPR019370,MobiDBLite:mobidb-lite,PANTHER:PTHR15967,Pfam:PF10238
chr10_pilon_pilon	maker	mRNA	2701617	2713654	.	-	.	ID=vitri10g01520-mRNA-1;Parent=vitri10g01520;Name=vitri10g01520-mRNA-1;_AED=0.18;_eAED=0.18;_QI=101|1|1|1|1|1|3|289|179;Note=Similar to Eapp: E2F-associated phosphoprotein (Mus musculus OX%3D10090);Dbxref=InterPro:IPR019370,MobiDBLite:mobidb-lite,PANTHER:PTHR15967,Pfam:PF10238
chr10_pilon_pilon	maker	three_prime_UTR	2701617	2701905	.	-	.	ID=vitri10g01520-mRNA-1:three_prime_utr;Parent=vitri10g01520-mRNA-1
chr10_pilon_pilon	maker	exon	2701617	2702161	.	-	.	ID=vitri10g01520-mRNA-1:exon:643;Parent=vitri10g01520-mRNA-1
chr10_pilon_pilon	maker	CDS	2701906	2702161	.	-	1	ID=vitri10g01520-mRNA-1:cds;Parent=vitri10g01520-mRNA-1
chr10_pilon_pilon	maker	exon	2711177	2711345	.	-	.	ID=vitri10g01520-mRNA-1:exon:642;Parent=vitri10g01520-mRNA-1
chr10_pilon_pilon	maker	CDS	2711177	2711345	.	-	2	ID=vitri10g01520-mRNA-1:cds;Parent=vitri10g01520-mRNA-1
chr10_pilon_pilon	maker	CDS	2713439	2713553	.	-	0	ID=vitri10g01520-mRNA-1:cds;Parent=vitri10g01520-mRNA-1
chr10_pilon_pilon	maker	exon	2713439	2713654	.	-	.	ID=vitri10g01520-mRNA-1:exon:641;Parent=vitri10g01520-mRNA-1
chr10_pilon_pilon	maker	five_prime_UTR	2713554	2713654	.	-	.	ID=vitri10g01520-mRNA-1:five_prime_utr;Parent=vitri10g01520-mRNA-1
###
chr10_pilon_pilon	maker	gene	2714375	2715024	.	-	.	ID=vitri10g01530;Name=vitri10g01530;Note=Protein of unknown function
chr10_pilon_pilon	maker	mRNA	2714375	2715024	.	-	.	ID=vitri10g01530-mRNA-1;Parent=vitri10g01530;Name=vitri10g01530-mRNA-1;_AED=0.42;_eAED=0.48;_QI=0|0|0|1|0|0|3|0|193;Note=Protein of unknown function
chr10_pilon_pilon	maker	exon	2714375	2714587	.	-	.	ID=vitri10g01530-mRNA-1:exon:662;Parent=vitri10g01530-mRNA-1
chr10_pilon_pilon	maker	CDS	2714375	2714587	.	-	0	ID=vitri10g01530-mRNA-1:cds;Parent=vitri10g01530-mRNA-1
chr10_pilon_pilon	maker	exon	2714593	2714686	.	-	.	ID=vitri10g01530-mRNA-1:exon:663;Parent=vitri10g01530-mRNA-1
chr10_pilon_pilon	maker	CDS	2714593	2714686	.	-	1	ID=vitri10g01530-mRNA-1:cds;Parent=vitri10g01530-mRNA-1
chr10_pilon_pilon	maker	exon	2714753	2715024	.	-	.	ID=vitri10g01530-mRNA-1:exon:664;Parent=vitri10g01530-mRNA-1
chr10_pilon_pilon	maker	CDS	2714753	2715024	.	-	0	ID=vitri10g01530-mRNA-1:cds;Parent=vitri10g01530-mRNA-1
###
chr10_pilon_pilon	maker	gene	2715138	2716892	.	-	.	ID=vitri10g01540;Name=vitri10g01540;Note=Protein of unknown function
chr10_pilon_pilon	maker	mRNA	2715138	2716892	.	-	.	ID=vitri10g01540-mRNA-1;Parent=vitri10g01540;Name=vitri10g01540-mRNA-1;_AED=0.31;_eAED=0.36;_QI=0|0|0|1|0|0|9|0|449;Note=Protein of unknown function
chr10_pilon_pilon	maker	exon	2715138	2715344	.	-	.	ID=vitri10g01540-mRNA-1:exon:653;Parent=vitri10g01540-mRNA-1
chr10_pilon_pilon	maker	CDS	2715138	2715344	.	-	0	ID=vitri10g01540-mRNA-1:cds;Parent=vitri10g01540-mRNA-1
chr10_pilon_pilon	maker	exon	2715372	2715489	.	-	.	ID=vitri10g01540-mRNA-1:exon:654;Parent=vitri10g01540-mRNA-1
chr10_pilon_pilon	maker	CDS	2715372	2715489	.	-	1	ID=vitri10g01540-mRNA-1:cds;Parent=vitri10g01540-mRNA-1
chr10_pilon_pilon	maker	exon	2715509	2715600	.	-	.	ID=vitri10g01540-mRNA-1:exon:655;Parent=vitri10g01540-mRNA-1
chr10_pilon_pilon	maker	CDS	2715509	2715600	.	-	0	ID=vitri10g01540-mRNA-1:cds;Parent=vitri10g01540-mRNA-1
chr10_pilon_pilon	maker	exon	2715772	2715917	.	-	.	ID=vitri10g01540-mRNA-1:exon:656;Parent=vitri10g01540-mRNA-1
chr10_pilon_pilon	maker	CDS	2715772	2715917	.	-	2	ID=vitri10g01540-mRNA-1:cds;Parent=vitri10g01540-mRNA-1
chr10_pilon_pilon	maker	exon	2715934	2716060	.	-	.	ID=vitri10g01540-mRNA-1:exon:657;Parent=vitri10g01540-mRNA-1
chr10_pilon_pilon	maker	CDS	2715934	2716060	.	-	0	ID=vitri10g01540-mRNA-1:cds;Parent=vitri10g01540-mRNA-1
chr10_pilon_pilon	maker	exon	2716079	2716322	.	-	.	ID=vitri10g01540-mRNA-1:exon:658;Parent=vitri10g01540-mRNA-1
chr10_pilon_pilon	maker	CDS	2716079	2716322	.	-	1	ID=vitri10g01540-mRNA-1:cds;Parent=vitri10g01540-mRNA-1
chr10_pilon_pilon	maker	exon	2716328	2716536	.	-	.	ID=vitri10g01540-mRNA-1:exon:659;Parent=vitri10g01540-mRNA-1
chr10_pilon_pilon	maker	CDS	2716328	2716536	.	-	0	ID=vitri10g01540-mRNA-1:cds;Parent=vitri10g01540-mRNA-1
chr10_pilon_pilon	maker	exon	2716595	2716720	.	-	.	ID=vitri10g01540-mRNA-1:exon:660;Parent=vitri10g01540-mRNA-1
chr10_pilon_pilon	maker	CDS	2716595	2716720	.	-	0	ID=vitri10g01540-mRNA-1:cds;Parent=vitri10g01540-mRNA-1
chr10_pilon_pilon	maker	exon	2716812	2716892	.	-	.	ID=vitri10g01540-mRNA-1:exon:661;Parent=vitri10g01540-mRNA-1
chr10_pilon_pilon	maker	CDS	2716812	2716892	.	-	0	ID=vitri10g01540-mRNA-1:cds;Parent=vitri10g01540-mRNA-1
###
chr10_pilon_pilon	maker	gene	2721944	2725868	.	-	.	ID=vitri10g01550;Name=vitri10g01550;Note=Protein of unknown function;Dbxref=MobiDBLite:mobidb-lite
chr10_pilon_pilon	maker	mRNA	2721944	2725868	.	-	.	ID=vitri10g01550-mRNA-1;Parent=vitri10g01550;Name=vitri10g01550-mRNA-1;_AED=0.48;_eAED=0.72;_QI=0|0|0|0.75|1|1|4|0|181;Note=Protein of unknown function;Dbxref=MobiDBLite:mobidb-lite
chr10_pilon_pilon	maker	exon	2721944	2722038	.	-	.	ID=vitri10g01550-mRNA-1:exon:649;Parent=vitri10g01550-mRNA-1
chr10_pilon_pilon	maker	CDS	2721944	2722038	.	-	2	ID=vitri10g01550-mRNA-1:cds;Parent=vitri10g01550-mRNA-1
chr10_pilon_pilon	maker	exon	2724306	2724528	.	-	.	ID=vitri10g01550-mRNA-1:exon:650;Parent=vitri10g01550-mRNA-1
chr10_pilon_pilon	maker	CDS	2724306	2724528	.	-	0	ID=vitri10g01550-mRNA-1:cds;Parent=vitri10g01550-mRNA-1
chr10_pilon_pilon	maker	exon	2724638	2724767	.	-	.	ID=vitri10g01550-mRNA-1:exon:651;Parent=vitri10g01550-mRNA-1
chr10_pilon_pilon	maker	CDS	2724638	2724767	.	-	1	ID=vitri10g01550-mRNA-1:cds;Parent=vitri10g01550-mRNA-1
chr10_pilon_pilon	maker	exon	2725771	2725868	.	-	.	ID=vitri10g01550-mRNA-1:exon:652;Parent=vitri10g01550-mRNA-1
chr10_pilon_pilon	maker	CDS	2725771	2725868	.	-	0	ID=vitri10g01550-mRNA-1:cds;Parent=vitri10g01550-mRNA-1
###
chr10_pilon_pilon	maker	gene	2753852	2754173	.	-	.	ID=vitri10g01560;Name=vitri10g01560;Note=Similar to CAT2: Catalase isozyme 2 (Gossypium hirsutum OX%3D3635);Dbxref=InterPro:IPR018028,InterPro:IPR020835,PANTHER:PTHR11465,PANTHER:PTHR11465:SF34,SUPERFAMILY:SSF56634;Ontology_term=GO:0004096,GO:0006979,GO:0020037,GO:0055114
chr10_pilon_pilon	maker	mRNA	2753852	2754173	.	-	.	ID=vitri10g01560-mRNA-1;Parent=vitri10g01560;Name=vitri10g01560-mRNA-1;_AED=0.22;_eAED=0.38;_QI=0|0|0|1|0|0|2|0|101;Note=Similar to CAT2: Catalase isozyme 2 (Gossypium hirsutum OX%3D3635);Dbxref=InterPro:IPR018028,InterPro:IPR020835,PANTHER:PTHR11465,PANTHER:PTHR11465:SF34,SUPERFAMILY:SSF56634;Ontology_term=GO:0004096,GO:0006979,GO:0020037,GO:0055114
chr10_pilon_pilon	maker	exon	2753852	2754067	.	-	.	ID=vitri10g01560-mRNA-1:exon:665;Parent=vitri10g01560-mRNA-1
chr10_pilon_pilon	maker	CDS	2753852	2754067	.	-	0	ID=vitri10g01560-mRNA-1:cds;Parent=vitri10g01560-mRNA-1
chr10_pilon_pilon	maker	exon	2754084	2754173	.	-	.	ID=vitri10g01560-mRNA-1:exon:666;Parent=vitri10g01560-mRNA-1
chr10_pilon_pilon	maker	CDS	2754084	2754173	.	-	0	ID=vitri10g01560-mRNA-1:cds;Parent=vitri10g01560-mRNA-1
###
chr10_pilon_pilon	maker	gene	2760626	2764112	.	+	.	ID=vitri10g01570;Name=vitri10g01570;Note=Protein of unknown function;Dbxref=Coils:Coil,InterPro:IPR025452,Pfam:PF13960
chr10_pilon_pilon	maker	mRNA	2760626	2764112	.	+	.	ID=vitri10g01570-mRNA-1;Parent=vitri10g01570;Name=vitri10g01570-mRNA-1;_AED=0.12;_eAED=0.12;_QI=4|0|0|0.83|0.4|0.5|6|0|376;Note=Protein of unknown function;Dbxref=Coils:Coil,InterPro:IPR025452,Pfam:PF13960
chr10_pilon_pilon	maker	five_prime_UTR	2760626	2760629	.	+	.	ID=vitri10g01570-mRNA-1:five_prime_utr;Parent=vitri10g01570-mRNA-1
chr10_pilon_pilon	maker	exon	2760626	2760952	.	+	.	ID=vitri10g01570-mRNA-1:exon:635;Parent=vitri10g01570-mRNA-1
chr10_pilon_pilon	maker	CDS	2760630	2760952	.	+	0	ID=vitri10g01570-mRNA-1:cds;Parent=vitri10g01570-mRNA-1
chr10_pilon_pilon	maker	exon	2761067	2761130	.	+	.	ID=vitri10g01570-mRNA-1:exon:636;Parent=vitri10g01570-mRNA-1
chr10_pilon_pilon	maker	CDS	2761067	2761130	.	+	1	ID=vitri10g01570-mRNA-1:cds;Parent=vitri10g01570-mRNA-1
chr10_pilon_pilon	maker	exon	2761736	2761941	.	+	.	ID=vitri10g01570-mRNA-1:exon:637;Parent=vitri10g01570-mRNA-1
chr10_pilon_pilon	maker	CDS	2761736	2761941	.	+	0	ID=vitri10g01570-mRNA-1:cds;Parent=vitri10g01570-mRNA-1
chr10_pilon_pilon	maker	exon	2763053	2763158	.	+	.	ID=vitri10g01570-mRNA-1:exon:638;Parent=vitri10g01570-mRNA-1
chr10_pilon_pilon	maker	CDS	2763053	2763158	.	+	1	ID=vitri10g01570-mRNA-1:cds;Parent=vitri10g01570-mRNA-1
chr10_pilon_pilon	maker	exon	2763411	2763584	.	+	.	ID=vitri10g01570-mRNA-1:exon:639;Parent=vitri10g01570-mRNA-1
chr10_pilon_pilon	maker	CDS	2763411	2763584	.	+	0	ID=vitri10g01570-mRNA-1:cds;Parent=vitri10g01570-mRNA-1
chr10_pilon_pilon	maker	exon	2763858	2764112	.	+	.	ID=vitri10g01570-mRNA-1:exon:640;Parent=vitri10g01570-mRNA-1
chr10_pilon_pilon	maker	CDS	2763858	2764112	.	+	0	ID=vitri10g01570-mRNA-1:cds;Parent=vitri10g01570-mRNA-1
###
chr10_pilon_pilon	maker	gene	2771025	2771256	.	-	.	ID=vitri10g01580;Name=vitri10g01580;Note=Similar to LHA2: Plasma membrane ATPase 2 (Fragment) (Solanum lycopersicum OX%3D4081);Dbxref=Gene3D:G3DSA:3.40.1110.10,InterPro:IPR023299,PANTHER:PTHR42861,PANTHER:PTHR42861:SF11;Ontology_term=GO:0000166
chr10_pilon_pilon	maker	mRNA	2771025	2771256	.	-	.	ID=vitri10g01580-mRNA-1;Parent=vitri10g01580;Name=vitri10g01580-mRNA-1;_AED=0.35;_eAED=0.64;_QI=0|0|0|1|0|0|2|0|68;Note=Similar to LHA2: Plasma membrane ATPase 2 (Fragment) (Solanum lycopersicum OX%3D4081);Dbxref=Gene3D:G3DSA:3.40.1110.10,InterPro:IPR023299,PANTHER:PTHR42861,PANTHER:PTHR42861:SF11;Ontology_term=GO:0000166
chr10_pilon_pilon	maker	exon	2771025	2771118	.	-	.	ID=vitri10g01580-mRNA-1:exon:667;Parent=vitri10g01580-mRNA-1
chr10_pilon_pilon	maker	CDS	2771025	2771118	.	-	1	ID=vitri10g01580-mRNA-1:cds;Parent=vitri10g01580-mRNA-1
chr10_pilon_pilon	maker	exon	2771144	2771256	.	-	.	ID=vitri10g01580-mRNA-1:exon:668;Parent=vitri10g01580-mRNA-1
chr10_pilon_pilon	maker	CDS	2771144	2771256	.	-	0	ID=vitri10g01580-mRNA-1:cds;Parent=vitri10g01580-mRNA-1
###
chr10_pilon_pilon	maker	gene	2771357	2771656	.	-	.	ID=vitri10g01590;Name=vitri10g01590;Note=Protein of unknown function;Dbxref=MobiDBLite:mobidb-lite,SignalP_EUK:SignalP-noTM
chr10_pilon_pilon	maker	mRNA	2771357	2771656	.	-	.	ID=vitri10g01590-mRNA-1;Parent=vitri10g01590;Name=vitri10g01590-mRNA-1;_AED=0.28;_eAED=0.33;_QI=0|-1|0|1|-1|1|1|0|99;Note=Protein of unknown function;Dbxref=MobiDBLite:mobidb-lite,SignalP_EUK:SignalP-noTM
chr10_pilon_pilon	maker	exon	2771357	2771656	.	-	.	ID=vitri10g01590-mRNA-1:exon:646;Parent=vitri10g01590-mRNA-1
chr10_pilon_pilon	maker	CDS	2771357	2771656	.	-	0	ID=vitri10g01590-mRNA-1:cds;Parent=vitri10g01590-mRNA-1
###
chr10_pilon_pilon	maker	gene	2781017	2791348	.	+	.	ID=vitri10g01600;Name=vitri10g01600;Note=Similar to PCMP-E27: Pentatricopeptide repeat-containing protein At3g29230 (Arabidopsis thaliana OX%3D3702);Dbxref=CDD:cd02947,Gene3D:G3DSA:1.25.40.10,Gene3D:G3DSA:3.40.30.10,InterPro:IPR002885,InterPro:IPR011990,InterPro:IPR013766,InterPro:IPR036249,PANTHER:PTHR24015,PANTHER:PTHR24015:SF1086,PRINTS:PR00421,Pfam:PF00085,Pfam:PF01535,Pfam:PF12854,Pfam:PF13041,ProSiteProfiles:PS51352,ProSiteProfiles:PS51375,SUPERFAMILY:SSF52833,TIGRFAM:TIGR00756;Ontology_term=GO:0005515,GO:0045454
chr10_pilon_pilon	maker	mRNA	2781017	2791348	.	+	.	ID=vitri10g01600-mRNA-1;Parent=vitri10g01600;Name=vitri10g01600-mRNA-1;_AED=0.14;_eAED=0.14;_QI=0|0.5|0|1|0|0.33|3|0|757;Note=Similar to PCMP-E27: Pentatricopeptide repeat-containing protein At3g29230 (Arabidopsis thaliana OX%3D3702);Dbxref=CDD:cd02947,Gene3D:G3DSA:1.25.40.10,Gene3D:G3DSA:3.40.30.10,InterPro:IPR002885,InterPro:IPR011990,InterPro:IPR013766,InterPro:IPR036249,PANTHER:PTHR24015,PANTHER:PTHR24015:SF1086,PRINTS:PR00421,Pfam:PF00085,Pfam:PF01535,Pfam:PF12854,Pfam:PF13041,ProSiteProfiles:PS51352,ProSiteProfiles:PS51375,SUPERFAMILY:SSF52833,TIGRFAM:TIGR00756;Ontology_term=GO:0005515,GO:0045454
chr10_pilon_pilon	maker	exon	2781017	2781496	.	+	.	ID=vitri10g01600-mRNA-1:exon:443;Parent=vitri10g01600-mRNA-1
chr10_pilon_pilon	maker	CDS	2781017	2781496	.	+	0	ID=vitri10g01600-mRNA-1:cds;Parent=vitri10g01600-mRNA-1
chr10_pilon_pilon	maker	exon	2788032	2788237	.	+	.	ID=vitri10g01600-mRNA-1:exon:444;Parent=vitri10g01600-mRNA-1
chr10_pilon_pilon	maker	CDS	2788032	2788237	.	+	0	ID=vitri10g01600-mRNA-1:cds;Parent=vitri10g01600-mRNA-1
chr10_pilon_pilon	maker	exon	2789761	2791348	.	+	.	ID=vitri10g01600-mRNA-1:exon:445;Parent=vitri10g01600-mRNA-1
chr10_pilon_pilon	maker	CDS	2789761	2791348	.	+	1	ID=vitri10g01600-mRNA-1:cds;Parent=vitri10g01600-mRNA-1
###
chr10_pilon_pilon	maker	gene	2785299	2786229	.	-	.	ID=vitri10g01610;Name=vitri10g01610;Note=Protein of unknown function;Dbxref=MobiDBLite:mobidb-lite
chr10_pilon_pilon	maker	mRNA	2785299	2786229	.	-	.	ID=vitri10g01610-mRNA-1;Parent=vitri10g01610;Name=vitri10g01610-mRNA-1;_AED=0.25;_eAED=0.25;_QI=0|0|0|0.5|1|1|2|0|152;Note=Protein of unknown function;Dbxref=MobiDBLite:mobidb-lite
chr10_pilon_pilon	maker	exon	2785299	2785742	.	-	.	ID=vitri10g01610-mRNA-1:exon:644;Parent=vitri10g01610-mRNA-1
chr10_pilon_pilon	maker	CDS	2785299	2785742	.	-	0	ID=vitri10g01610-mRNA-1:cds;Parent=vitri10g01610-mRNA-1
chr10_pilon_pilon	maker	exon	2786215	2786229	.	-	.	ID=vitri10g01610-mRNA-1:exon:645;Parent=vitri10g01610-mRNA-1
chr10_pilon_pilon	maker	CDS	2786215	2786229	.	-	0	ID=vitri10g01610-mRNA-1:cds;Parent=vitri10g01610-mRNA-1
###
chr10_pilon_pilon	maker	gene	2791570	2791887	.	+	.	ID=vitri10g01620;Name=vitri10g01620;Note=Similar to DYW1: Pentatricopeptide repeat-containing protein DWY1%2C chloroplastic (Arabidopsis thaliana OX%3D3702);Dbxref=InterPro:IPR032867,PANTHER:PTHR44853,Pfam:PF14432;Ontology_term=GO:0008270
chr10_pilon_pilon	maker	mRNA	2791570	2791887	.	+	.	ID=vitri10g01620-mRNA-1;Parent=vitri10g01620;Name=vitri10g01620-mRNA-1;_AED=0.45;_eAED=0.45;_QI=0|-1|0|1|-1|1|1|0|105;Note=Similar to DYW1: Pentatricopeptide repeat-containing protein DWY1%2C chloroplastic (Arabidopsis thaliana OX%3D3702);Dbxref=InterPro:IPR032867,PANTHER:PTHR44853,Pfam:PF14432;Ontology_term=GO:0008270
chr10_pilon_pilon	maker	exon	2791570	2791887	.	+	.	ID=vitri10g01620-mRNA-1:exon:446;Parent=vitri10g01620-mRNA-1
chr10_pilon_pilon	maker	CDS	2791570	2791887	.	+	0	ID=vitri10g01620-mRNA-1:cds;Parent=vitri10g01620-mRNA-1
###
chr10_pilon_pilon	maker	gene	2803506	2813310	.	-	.	ID=vitri10g01630;Name=vitri10g01630;Note=Similar to At4g27190: Disease resistance protein At4g27190 (Arabidopsis thaliana OX%3D3702);Dbxref=CDD:cd00009,Coils:Coil,Gene3D:G3DSA:1.10.8.430,Gene3D:G3DSA:3.40.50.300,Gene3D:G3DSA:3.80.10.10,InterPro:IPR001611,InterPro:IPR002182,InterPro:IPR003593,InterPro:IPR027417,InterPro:IPR032675,PRINTS:PR00364,Pfam:PF00931,ProSiteProfiles:PS51450,SMART:SM00382,SUPERFAMILY:SSF52047,SUPERFAMILY:SSF52058,SUPERFAMILY:SSF52540;Ontology_term=GO:0005515,GO:0043531
chr10_pilon_pilon	maker	mRNA	2803506	2813310	.	-	.	ID=vitri10g01630-mRNA-1;Parent=vitri10g01630;Name=vitri10g01630-mRNA-1;_AED=0.07;_eAED=0.07;_QI=0|0.28|0|1|0.57|0.37|8|0|1661;Note=Similar to At4g27190: Disease resistance protein At4g27190 (Arabidopsis thaliana OX%3D3702);Dbxref=CDD:cd00009,Coils:Coil,Gene3D:G3DSA:1.10.8.430,Gene3D:G3DSA:3.40.50.300,Gene3D:G3DSA:3.80.10.10,InterPro:IPR001611,InterPro:IPR002182,InterPro:IPR003593,InterPro:IPR027417,InterPro:IPR032675,PRINTS:PR00364,Pfam:PF00931,ProSiteProfiles:PS51450,SMART:SM00382,SUPERFAMILY:SSF52047,SUPERFAMILY:SSF52058,SUPERFAMILY:SSF52540;Ontology_term=GO:0005515,GO:0043531
chr10_pilon_pilon	maker	exon	2803506	2803550	.	-	.	ID=vitri10g01630-mRNA-1:exon:447;Parent=vitri10g01630-mRNA-1
chr10_pilon_pilon	maker	CDS	2803506	2803550	.	-	0	ID=vitri10g01630-mRNA-1:cds;Parent=vitri10g01630-mRNA-1
chr10_pilon_pilon	maker	exon	2803648	2804025	.	-	.	ID=vitri10g01630-mRNA-1:exon:448;Parent=vitri10g01630-mRNA-1
chr10_pilon_pilon	maker	CDS	2803648	2804025	.	-	0	ID=vitri10g01630-mRNA-1:cds;Parent=vitri10g01630-mRNA-1
chr10_pilon_pilon	maker	exon	2804975	2805418	.	-	.	ID=vitri10g01630-mRNA-1:exon:449;Parent=vitri10g01630-mRNA-1
chr10_pilon_pilon	maker	CDS	2804975	2805418	.	-	0	ID=vitri10g01630-mRNA-1:cds;Parent=vitri10g01630-mRNA-1
chr10_pilon_pilon	maker	exon	2806299	2806760	.	-	.	ID=vitri10g01630-mRNA-1:exon:450;Parent=vitri10g01630-mRNA-1
chr10_pilon_pilon	maker	CDS	2806299	2806760	.	-	0	ID=vitri10g01630-mRNA-1:cds;Parent=vitri10g01630-mRNA-1
chr10_pilon_pilon	maker	exon	2808300	2808692	.	-	.	ID=vitri10g01630-mRNA-1:exon:451;Parent=vitri10g01630-mRNA-1
chr10_pilon_pilon	maker	CDS	2808300	2808692	.	-	0	ID=vitri10g01630-mRNA-1:cds;Parent=vitri10g01630-mRNA-1
chr10_pilon_pilon	maker	exon	2809877	2812642	.	-	.	ID=vitri10g01630-mRNA-1:exon:452;Parent=vitri10g01630-mRNA-1
chr10_pilon_pilon	maker	CDS	2809877	2812642	.	-	0	ID=vitri10g01630-mRNA-1:cds;Parent=vitri10g01630-mRNA-1
chr10_pilon_pilon	maker	exon	2812699	2813164	.	-	.	ID=vitri10g01630-mRNA-1:exon:453;Parent=vitri10g01630-mRNA-1
chr10_pilon_pilon	maker	CDS	2812699	2813164	.	-	1	ID=vitri10g01630-mRNA-1:cds;Parent=vitri10g01630-mRNA-1
chr10_pilon_pilon	maker	exon	2813282	2813310	.	-	.	ID=vitri10g01630-mRNA-1:exon:454;Parent=vitri10g01630-mRNA-1
chr10_pilon_pilon	maker	CDS	2813282	2813310	.	-	0	ID=vitri10g01630-mRNA-1:cds;Parent=vitri10g01630-mRNA-1
###
chr10_pilon_pilon	maker	gene	2808018	2808725	.	+	.	ID=vitri10g01640;Name=vitri10g01640;Note=Protein of unknown function
chr10_pilon_pilon	maker	mRNA	2808018	2808725	.	+	.	ID=vitri10g01640-mRNA-1;Parent=vitri10g01640;Name=vitri10g01640-mRNA-1;_AED=0.03;_eAED=0.03;_QI=0|0|0.5|0.5|1|1|2|5|128;Note=Protein of unknown function
chr10_pilon_pilon	maker	exon	2808018	2808025	.	+	.	ID=vitri10g01640-mRNA-1:exon:441;Parent=vitri10g01640-mRNA-1
chr10_pilon_pilon	maker	CDS	2808018	2808025	.	+	0	ID=vitri10g01640-mRNA-1:cds;Parent=vitri10g01640-mRNA-1
chr10_pilon_pilon	maker	CDS	2808342	2808720	.	+	1	ID=vitri10g01640-mRNA-1:cds;Parent=vitri10g01640-mRNA-1
chr10_pilon_pilon	maker	exon	2808342	2808725	.	+	.	ID=vitri10g01640-mRNA-1:exon:442;Parent=vitri10g01640-mRNA-1
chr10_pilon_pilon	maker	three_prime_UTR	2808721	2808725	.	+	.	ID=vitri10g01640-mRNA-1:three_prime_utr;Parent=vitri10g01640-mRNA-1
###
chr10_pilon_pilon	maker	gene	2822575	2823159	.	-	.	ID=vitri10g01650;Name=vitri10g01650;Note=Similar to CYP87A3: Cytochrome P450 87A3 (Oryza sativa subsp. japonica OX%3D39947);Dbxref=Gene3D:G3DSA:1.10.630.10,InterPro:IPR001128,InterPro:IPR036396,PANTHER:PTHR24286,PANTHER:PTHR24286:SF90,Pfam:PF00067,SUPERFAMILY:SSF48264;Ontology_term=GO:0005506,GO:0016705,GO:0020037,GO:0055114
chr10_pilon_pilon	maker	mRNA	2822575	2823159	.	-	.	ID=vitri10g01650-mRNA-1;Parent=vitri10g01650;Name=vitri10g01650-mRNA-1;_AED=0.24;_eAED=0.24;_QI=0|0|0|1|0|0|2|0|158;Note=Similar to CYP87A3: Cytochrome P450 87A3 (Oryza sativa subsp. japonica OX%3D39947);Dbxref=Gene3D:G3DSA:1.10.630.10,InterPro:IPR001128,InterPro:IPR036396,PANTHER:PTHR24286,PANTHER:PTHR24286:SF90,Pfam:PF00067,SUPERFAMILY:SSF48264;Ontology_term=GO:0005506,GO:0016705,GO:0020037,GO:0055114
chr10_pilon_pilon	maker	exon	2822575	2822910	.	-	.	ID=vitri10g01650-mRNA-1:exon:464;Parent=vitri10g01650-mRNA-1
chr10_pilon_pilon	maker	CDS	2822575	2822910	.	-	0	ID=vitri10g01650-mRNA-1:cds;Parent=vitri10g01650-mRNA-1
chr10_pilon_pilon	maker	exon	2823019	2823159	.	-	.	ID=vitri10g01650-mRNA-1:exon:465;Parent=vitri10g01650-mRNA-1
chr10_pilon_pilon	maker	CDS	2823019	2823159	.	-	0	ID=vitri10g01650-mRNA-1:cds;Parent=vitri10g01650-mRNA-1
###
chr10_pilon_pilon	maker	gene	2863952	2872905	.	-	.	ID=vitri10g01660;Name=vitri10g01660;Note=Similar to RGA2: Disease resistance protein RGA2 (Solanum bulbocastanum OX%3D147425);Dbxref=Coils:Coil,Gene3D:G3DSA:1.10.8.430,Gene3D:G3DSA:3.40.50.300,Gene3D:G3DSA:3.80.10.10,InterPro:IPR002182,InterPro:IPR027417,InterPro:IPR032675,PRINTS:PR00364,Pfam:PF00931,SUPERFAMILY:SSF52058,SUPERFAMILY:SSF52540;Ontology_term=GO:0043531
chr10_pilon_pilon	maker	mRNA	2863952	2872905	.	-	.	ID=vitri10g01660-mRNA-1;Parent=vitri10g01660;Name=vitri10g01660-mRNA-1;_AED=0.16;_eAED=0.17;_QI=0|0|0|1|0|0|7|0|788;Note=Similar to RGA2: Disease resistance protein RGA2 (Solanum bulbocastanum OX%3D147425);Dbxref=Coils:Coil,Gene3D:G3DSA:1.10.8.430,Gene3D:G3DSA:3.40.50.300,Gene3D:G3DSA:3.80.10.10,InterPro:IPR002182,InterPro:IPR027417,InterPro:IPR032675,PRINTS:PR00364,Pfam:PF00931,SUPERFAMILY:SSF52058,SUPERFAMILY:SSF52540;Ontology_term=GO:0043531
chr10_pilon_pilon	maker	exon	2863952	2864290	.	-	.	ID=vitri10g01660-mRNA-1:exon:455;Parent=vitri10g01660-mRNA-1
chr10_pilon_pilon	maker	CDS	2863952	2864290	.	-	0	ID=vitri10g01660-mRNA-1:cds;Parent=vitri10g01660-mRNA-1
chr10_pilon_pilon	maker	exon	2865830	2866258	.	-	.	ID=vitri10g01660-mRNA-1:exon:456;Parent=vitri10g01660-mRNA-1
chr10_pilon_pilon	maker	CDS	2865830	2866258	.	-	0	ID=vitri10g01660-mRNA-1:cds;Parent=vitri10g01660-mRNA-1
chr10_pilon_pilon	maker	exon	2866304	2866372	.	-	.	ID=vitri10g01660-mRNA-1:exon:457;Parent=vitri10g01660-mRNA-1
chr10_pilon_pilon	maker	CDS	2866304	2866372	.	-	0	ID=vitri10g01660-mRNA-1:cds;Parent=vitri10g01660-mRNA-1
chr10_pilon_pilon	maker	exon	2871279	2871432	.	-	.	ID=vitri10g01660-mRNA-1:exon:458;Parent=vitri10g01660-mRNA-1
chr10_pilon_pilon	maker	CDS	2871279	2871432	.	-	1	ID=vitri10g01660-mRNA-1:cds;Parent=vitri10g01660-mRNA-1
chr10_pilon_pilon	maker	exon	2871438	2871891	.	-	.	ID=vitri10g01660-mRNA-1:exon:459;Parent=vitri10g01660-mRNA-1
chr10_pilon_pilon	maker	CDS	2871438	2871891	.	-	2	ID=vitri10g01660-mRNA-1:cds;Parent=vitri10g01660-mRNA-1
chr10_pilon_pilon	maker	exon	2871976	2872286	.	-	.	ID=vitri10g01660-mRNA-1:exon:460;Parent=vitri10g01660-mRNA-1
chr10_pilon_pilon	maker	CDS	2871976	2872286	.	-	1	ID=vitri10g01660-mRNA-1:cds;Parent=vitri10g01660-mRNA-1
chr10_pilon_pilon	maker	exon	2872295	2872905	.	-	.	ID=vitri10g01660-mRNA-1:exon:461;Parent=vitri10g01660-mRNA-1
chr10_pilon_pilon	maker	CDS	2872295	2872905	.	-	0	ID=vitri10g01660-mRNA-1:cds;Parent=vitri10g01660-mRNA-1
###
chr10_pilon_pilon	maker	gene	2872947	2873518	.	-	.	ID=vitri10g01670;Name=vitri10g01670;Note=Protein of unknown function;Dbxref=Coils:Coil,PANTHER:PTHR44061
chr10_pilon_pilon	maker	mRNA	2872947	2873518	.	-	.	ID=vitri10g01670-mRNA-1;Parent=vitri10g01670;Name=vitri10g01670-mRNA-1;_AED=0.42;_eAED=0.44;_QI=0|0|0|1|0|0|2|0|187;Note=Protein of unknown function;Dbxref=Coils:Coil,PANTHER:PTHR44061
chr10_pilon_pilon	maker	exon	2872947	2873308	.	-	.	ID=vitri10g01670-mRNA-1:exon:462;Parent=vitri10g01670-mRNA-1
chr10_pilon_pilon	maker	CDS	2872947	2873308	.	-	2	ID=vitri10g01670-mRNA-1:cds;Parent=vitri10g01670-mRNA-1
chr10_pilon_pilon	maker	exon	2873317	2873518	.	-	.	ID=vitri10g01670-mRNA-1:exon:463;Parent=vitri10g01670-mRNA-1
chr10_pilon_pilon	maker	CDS	2873317	2873518	.	-	0	ID=vitri10g01670-mRNA-1:cds;Parent=vitri10g01670-mRNA-1
###
chr10_pilon_pilon	maker	gene	2926723	2927103	.	+	.	ID=vitri10g01680;Name=vitri10g01680;Note=Similar to PCMP-H82: Pentatricopeptide repeat-containing protein At3g62890 (Arabidopsis thaliana OX%3D3702);Dbxref=InterPro:IPR032867,PANTHER:PTHR44853,Pfam:PF14432;Ontology_term=GO:0008270
chr10_pilon_pilon	maker	mRNA	2926723	2927103	.	+	.	ID=vitri10g01680-mRNA-1;Parent=vitri10g01680;Name=vitri10g01680-mRNA-1;_AED=0.02;_eAED=0.02;_QI=0|-1|0|1|-1|1|1|0|126;Note=Similar to PCMP-H82: Pentatricopeptide repeat-containing protein At3g62890 (Arabidopsis thaliana OX%3D3702);Dbxref=InterPro:IPR032867,PANTHER:PTHR44853,Pfam:PF14432;Ontology_term=GO:0008270
chr10_pilon_pilon	maker	exon	2926723	2927103	.	+	.	ID=vitri10g01680-mRNA-1:exon:698;Parent=vitri10g01680-mRNA-1
chr10_pilon_pilon	maker	CDS	2926723	2927103	.	+	0	ID=vitri10g01680-mRNA-1:cds;Parent=vitri10g01680-mRNA-1
###
chr10_pilon_pilon	maker	gene	2965451	2968350	.	-	.	ID=vitri10g01690;Name=vitri10g01690;Note=Similar to glh-4: ATP-dependent RNA helicase glh-4 (Caenorhabditis elegans OX%3D6239);Dbxref=Gene3D:G3DSA:4.10.60.10,InterPro:IPR001878,InterPro:IPR036875,PANTHER:PTHR23002,PANTHER:PTHR23002:SF99,Pfam:PF00098,ProSiteProfiles:PS50158,SMART:SM00343,SUPERFAMILY:SSF57756;Ontology_term=GO:0003676,GO:0008270
chr10_pilon_pilon	maker	mRNA	2965451	2968350	.	-	.	ID=vitri10g01690-mRNA-1;Parent=vitri10g01690;Name=vitri10g01690-mRNA-1;_AED=0.27;_eAED=0.27;_QI=0|0.33|0|1|1|0.75|4|0|230;Note=Similar to glh-4: ATP-dependent RNA helicase glh-4 (Caenorhabditis elegans OX%3D6239);Dbxref=Gene3D:G3DSA:4.10.60.10,InterPro:IPR001878,InterPro:IPR036875,PANTHER:PTHR23002,PANTHER:PTHR23002:SF99,Pfam:PF00098,ProSiteProfiles:PS50158,SMART:SM00343,SUPERFAMILY:SSF57756;Ontology_term=GO:0003676,GO:0008270
chr10_pilon_pilon	maker	exon	2965451	2965688	.	-	.	ID=vitri10g01690-mRNA-1:exon:703;Parent=vitri10g01690-mRNA-1
chr10_pilon_pilon	maker	CDS	2965451	2965688	.	-	1	ID=vitri10g01690-mRNA-1:cds;Parent=vitri10g01690-mRNA-1
chr10_pilon_pilon	maker	exon	2965883	2965975	.	-	.	ID=vitri10g01690-mRNA-1:exon:704;Parent=vitri10g01690-mRNA-1
chr10_pilon_pilon	maker	CDS	2965883	2965975	.	-	1	ID=vitri10g01690-mRNA-1:cds;Parent=vitri10g01690-mRNA-1
chr10_pilon_pilon	maker	exon	2966891	2967108	.	-	.	ID=vitri10g01690-mRNA-1:exon:705;Parent=vitri10g01690-mRNA-1
chr10_pilon_pilon	maker	CDS	2966891	2967108	.	-	0	ID=vitri10g01690-mRNA-1:cds;Parent=vitri10g01690-mRNA-1
chr10_pilon_pilon	maker	exon	2968210	2968350	.	-	.	ID=vitri10g01690-mRNA-1:exon:706;Parent=vitri10g01690-mRNA-1
chr10_pilon_pilon	maker	CDS	2968210	2968350	.	-	0	ID=vitri10g01690-mRNA-1:cds;Parent=vitri10g01690-mRNA-1
###
chr10_pilon_pilon	maker	gene	2976343	2976885	.	+	.	ID=vitri10g01700;Name=vitri10g01700;Note=Protein of unknown function;Dbxref=MobiDBLite:mobidb-lite
chr10_pilon_pilon	maker	mRNA	2976343	2976885	.	+	.	ID=vitri10g01700-mRNA-1;Parent=vitri10g01700;Name=vitri10g01700-mRNA-1;_AED=0.44;_eAED=0.44;_QI=0|0|0|1|0|0|2|0|124;Note=Protein of unknown function;Dbxref=MobiDBLite:mobidb-lite
chr10_pilon_pilon	maker	exon	2976343	2976429	.	+	.	ID=vitri10g01700-mRNA-1:exon:712;Parent=vitri10g01700-mRNA-1
chr10_pilon_pilon	maker	CDS	2976343	2976429	.	+	0	ID=vitri10g01700-mRNA-1:cds;Parent=vitri10g01700-mRNA-1
chr10_pilon_pilon	maker	exon	2976598	2976885	.	+	.	ID=vitri10g01700-mRNA-1:exon:713;Parent=vitri10g01700-mRNA-1
chr10_pilon_pilon	maker	CDS	2976598	2976885	.	+	0	ID=vitri10g01700-mRNA-1:cds;Parent=vitri10g01700-mRNA-1
###
chr10_pilon_pilon	maker	gene	2976955	2978530	.	+	.	ID=vitri10g01710;Name=vitri10g01710;Note=Protein of unknown function
chr10_pilon_pilon	maker	mRNA	2976955	2978530	.	+	.	ID=vitri10g01710-mRNA-1;Parent=vitri10g01710;Name=vitri10g01710-mRNA-1;_AED=0.35;_eAED=0.45;_QI=0|0|0|1|0|0|5|0|297;Note=Protein of unknown function
chr10_pilon_pilon	maker	exon	2976955	2977142	.	+	.	ID=vitri10g01710-mRNA-1:exon:707;Parent=vitri10g01710-mRNA-1
chr10_pilon_pilon	maker	CDS	2976955	2977142	.	+	0	ID=vitri10g01710-mRNA-1:cds;Parent=vitri10g01710-mRNA-1
chr10_pilon_pilon	maker	exon	2977199	2977382	.	+	.	ID=vitri10g01710-mRNA-1:exon:708;Parent=vitri10g01710-mRNA-1
chr10_pilon_pilon	maker	CDS	2977199	2977382	.	+	1	ID=vitri10g01710-mRNA-1:cds;Parent=vitri10g01710-mRNA-1
chr10_pilon_pilon	maker	exon	2977395	2977535	.	+	.	ID=vitri10g01710-mRNA-1:exon:709;Parent=vitri10g01710-mRNA-1
chr10_pilon_pilon	maker	CDS	2977395	2977535	.	+	0	ID=vitri10g01710-mRNA-1:cds;Parent=vitri10g01710-mRNA-1
chr10_pilon_pilon	maker	exon	2978067	2978164	.	+	.	ID=vitri10g01710-mRNA-1:exon:710;Parent=vitri10g01710-mRNA-1
chr10_pilon_pilon	maker	CDS	2978067	2978164	.	+	0	ID=vitri10g01710-mRNA-1:cds;Parent=vitri10g01710-mRNA-1
chr10_pilon_pilon	maker	exon	2978248	2978530	.	+	.	ID=vitri10g01710-mRNA-1:exon:711;Parent=vitri10g01710-mRNA-1
chr10_pilon_pilon	maker	CDS	2978248	2978530	.	+	1	ID=vitri10g01710-mRNA-1:cds;Parent=vitri10g01710-mRNA-1
###
chr10_pilon_pilon	maker	gene	2978543	2978909	.	+	.	ID=vitri10g01720;Name=vitri10g01720;Note=Protein of unknown function
chr10_pilon_pilon	maker	mRNA	2978543	2978909	.	+	.	ID=vitri10g01720-mRNA-1;Parent=vitri10g01720;Name=vitri10g01720-mRNA-1;_AED=0.45;_eAED=0.63;_QI=0|0|0|1|0|0|2|0|94;Note=Protein of unknown function
chr10_pilon_pilon	maker	exon	2978543	2978625	.	+	.	ID=vitri10g01720-mRNA-1:exon:714;Parent=vitri10g01720-mRNA-1
chr10_pilon_pilon	maker	CDS	2978543	2978625	.	+	0	ID=vitri10g01720-mRNA-1:cds;Parent=vitri10g01720-mRNA-1
chr10_pilon_pilon	maker	exon	2978708	2978909	.	+	.	ID=vitri10g01720-mRNA-1:exon:715;Parent=vitri10g01720-mRNA-1
chr10_pilon_pilon	maker	CDS	2978708	2978909	.	+	1	ID=vitri10g01720-mRNA-1:cds;Parent=vitri10g01720-mRNA-1
###
chr10_pilon_pilon	maker	gene	2993416	3001011	.	+	.	ID=vitri10g01730;Name=vitri10g01730;Note=Similar to ATHX: Thioredoxin X%2C chloroplastic (Arabidopsis thaliana OX%3D3702);Dbxref=Gene3D:G3DSA:3.40.30.10,InterPro:IPR005746,InterPro:IPR013766,InterPro:IPR036249,PANTHER:PTHR10438,PANTHER:PTHR10438:SF270,Pfam:PF00085,SUPERFAMILY:SSF52833;Ontology_term=GO:0006662,GO:0015035,GO:0045454
chr10_pilon_pilon	maker	mRNA	2993416	3001011	.	+	.	ID=vitri10g01730-mRNA-1;Parent=vitri10g01730;Name=vitri10g01730-mRNA-1;_AED=0.34;_eAED=0.34;_QI=96|1|1|1|0|1|2|452|107;Note=Similar to ATHX: Thioredoxin X%2C chloroplastic (Arabidopsis thaliana OX%3D3702);Dbxref=Gene3D:G3DSA:3.40.30.10,InterPro:IPR005746,InterPro:IPR013766,InterPro:IPR036249,PANTHER:PTHR10438,PANTHER:PTHR10438:SF270,Pfam:PF00085,SUPERFAMILY:SSF52833;Ontology_term=GO:0006662,GO:0015035,GO:0045454
chr10_pilon_pilon	maker	five_prime_UTR	2993416	2993511	.	+	.	ID=vitri10g01730-mRNA-1:five_prime_utr;Parent=vitri10g01730-mRNA-1
chr10_pilon_pilon	maker	exon	2993416	2993835	.	+	.	ID=vitri10g01730-mRNA-1:exon:744;Parent=vitri10g01730-mRNA-1
chr10_pilon_pilon	maker	CDS	2993512	2993835	.	+	0	ID=vitri10g01730-mRNA-1:cds;Parent=vitri10g01730-mRNA-1
chr10_pilon_pilon	maker	exon	3000560	3001011	.	+	.	ID=vitri10g01730-mRNA-1:exon:745;Parent=vitri10g01730-mRNA-1
chr10_pilon_pilon	maker	three_prime_UTR	3000560	3001011	.	+	.	ID=vitri10g01730-mRNA-1:three_prime_utr;Parent=vitri10g01730-mRNA-1
###
chr10_pilon_pilon	maker	gene	2998332	3002103	.	-	.	ID=vitri10g01740;Name=vitri10g01740;Note=Protein of unknown function
chr10_pilon_pilon	maker	mRNA	2998332	3002103	.	-	.	ID=vitri10g01740-mRNA-1;Parent=vitri10g01740;Name=vitri10g01740-mRNA-1;_AED=0.28;_eAED=0.28;_QI=0|0|0|0.5|1|1|2|0|197;Note=Protein of unknown function
chr10_pilon_pilon	maker	exon	2998332	2998794	.	-	.	ID=vitri10g01740-mRNA-1:exon:759;Parent=vitri10g01740-mRNA-1
chr10_pilon_pilon	maker	CDS	2998332	2998794	.	-	1	ID=vitri10g01740-mRNA-1:cds;Parent=vitri10g01740-mRNA-1
chr10_pilon_pilon	maker	exon	3001973	3002103	.	-	.	ID=vitri10g01740-mRNA-1:exon:760;Parent=vitri10g01740-mRNA-1
chr10_pilon_pilon	maker	CDS	3001973	3002103	.	-	0	ID=vitri10g01740-mRNA-1:cds;Parent=vitri10g01740-mRNA-1
###
chr10_pilon_pilon	maker	gene	3002027	3003420	.	+	.	ID=vitri10g01750;Name=vitri10g01750;Note=Similar to PCMP-H49: Pentatricopeptide repeat-containing protein At5g46460%2C mitochondrial (Arabidopsis thaliana OX%3D3702);Dbxref=Gene3D:G3DSA:1.25.40.10,InterPro:IPR002885,InterPro:IPR011990,InterPro:IPR032867,PANTHER:PTHR44853,Pfam:PF01535,Pfam:PF14432,ProSiteProfiles:PS51375;Ontology_term=GO:0005515,GO:0008270
chr10_pilon_pilon	maker	mRNA	3002027	3003420	.	+	.	ID=vitri10g01750-mRNA-1;Parent=vitri10g01750;Name=vitri10g01750-mRNA-1;_AED=0.33;_eAED=0.34;_QI=0|0.2|0|1|0.4|0.33|6|0|298;Note=Similar to PCMP-H49: Pentatricopeptide repeat-containing protein At5g46460%2C mitochondrial (Arabidopsis thaliana OX%3D3702);Dbxref=Gene3D:G3DSA:1.25.40.10,InterPro:IPR002885,InterPro:IPR011990,InterPro:IPR032867,PANTHER:PTHR44853,Pfam:PF01535,Pfam:PF14432,ProSiteProfiles:PS51375;Ontology_term=GO:0005515,GO:0008270
chr10_pilon_pilon	maker	exon	3002027	3002037	.	+	.	ID=vitri10g01750-mRNA-1:exon:746;Parent=vitri10g01750-mRNA-1
chr10_pilon_pilon	maker	CDS	3002027	3002037	.	+	0	ID=vitri10g01750-mRNA-1:cds;Parent=vitri10g01750-mRNA-1
chr10_pilon_pilon	maker	exon	3002201	3002355	.	+	.	ID=vitri10g01750-mRNA-1:exon:747;Parent=vitri10g01750-mRNA-1
chr10_pilon_pilon	maker	CDS	3002201	3002355	.	+	1	ID=vitri10g01750-mRNA-1:cds;Parent=vitri10g01750-mRNA-1
chr10_pilon_pilon	maker	exon	3002404	3002543	.	+	.	ID=vitri10g01750-mRNA-1:exon:748;Parent=vitri10g01750-mRNA-1
chr10_pilon_pilon	maker	CDS	3002404	3002543	.	+	2	ID=vitri10g01750-mRNA-1:cds;Parent=vitri10g01750-mRNA-1
chr10_pilon_pilon	maker	exon	3002746	3002840	.	+	.	ID=vitri10g01750-mRNA-1:exon:749;Parent=vitri10g01750-mRNA-1
chr10_pilon_pilon	maker	CDS	3002746	3002840	.	+	0	ID=vitri10g01750-mRNA-1:cds;Parent=vitri10g01750-mRNA-1
chr10_pilon_pilon	maker	exon	3002915	3003103	.	+	.	ID=vitri10g01750-mRNA-1:exon:750;Parent=vitri10g01750-mRNA-1
chr10_pilon_pilon	maker	CDS	3002915	3003103	.	+	1	ID=vitri10g01750-mRNA-1:cds;Parent=vitri10g01750-mRNA-1
chr10_pilon_pilon	maker	exon	3003114	3003420	.	+	.	ID=vitri10g01750-mRNA-1:exon:751;Parent=vitri10g01750-mRNA-1
chr10_pilon_pilon	maker	CDS	3003114	3003420	.	+	1	ID=vitri10g01750-mRNA-1:cds;Parent=vitri10g01750-mRNA-1
###
chr10_pilon_pilon	maker	gene	3011178	3020389	.	-	.	ID=vitri10g01760;Name=vitri10g01760;Note=Similar to At4g27220: Probable disease resistance protein At4g27220 (Arabidopsis thaliana OX%3D3702);Dbxref=CDD:cd00009,Coils:Coil,Gene3D:G3DSA:1.10.8.430,Gene3D:G3DSA:3.40.50.300,Gene3D:G3DSA:3.80.10.10,InterPro:IPR001611,InterPro:IPR002182,InterPro:IPR003593,InterPro:IPR027417,InterPro:IPR032675,PANTHER:PTHR44061,PANTHER:PTHR44061:SF1,PRINTS:PR00364,Pfam:PF00931,ProSiteProfiles:PS51450,SMART:SM00382,SUPERFAMILY:SSF52058,SUPERFAMILY:SSF52540;Ontology_term=GO:0005515,GO:0043531
chr10_pilon_pilon	maker	mRNA	3011178	3020389	.	-	.	ID=vitri10g01760-mRNA-1;Parent=vitri10g01760;Name=vitri10g01760-mRNA-1;_AED=0.15;_eAED=0.15;_QI=0|0.5|0|1|1|1|3|0|1310;Note=Similar to At4g27220: Probable disease resistance protein At4g27220 (Arabidopsis thaliana OX%3D3702);Dbxref=CDD:cd00009,Coils:Coil,Gene3D:G3DSA:1.10.8.430,Gene3D:G3DSA:3.40.50.300,Gene3D:G3DSA:3.80.10.10,InterPro:IPR001611,InterPro:IPR002182,InterPro:IPR003593,InterPro:IPR027417,InterPro:IPR032675,PANTHER:PTHR44061,PANTHER:PTHR44061:SF1,PRINTS:PR00364,Pfam:PF00931,ProSiteProfiles:PS51450,SMART:SM00382,SUPERFAMILY:SSF52058,SUPERFAMILY:SSF52540;Ontology_term=GO:0005515,GO:0043531
chr10_pilon_pilon	maker	exon	3011178	3011930	.	-	.	ID=vitri10g01760-mRNA-1:exon:756;Parent=vitri10g01760-mRNA-1
chr10_pilon_pilon	maker	CDS	3011178	3011930	.	-	0	ID=vitri10g01760-mRNA-1:cds;Parent=vitri10g01760-mRNA-1
chr10_pilon_pilon	maker	exon	3012885	3013328	.	-	.	ID=vitri10g01760-mRNA-1:exon:757;Parent=vitri10g01760-mRNA-1
chr10_pilon_pilon	maker	CDS	3012885	3013328	.	-	0	ID=vitri10g01760-mRNA-1:cds;Parent=vitri10g01760-mRNA-1
chr10_pilon_pilon	maker	exon	3017657	3020389	.	-	.	ID=vitri10g01760-mRNA-1:exon:758;Parent=vitri10g01760-mRNA-1
chr10_pilon_pilon	maker	CDS	3017657	3020389	.	-	0	ID=vitri10g01760-mRNA-1:cds;Parent=vitri10g01760-mRNA-1
###
chr10_pilon_pilon	maker	gene	3045195	3045407	.	-	.	ID=vitri10g01770;Name=vitri10g01770;Note=Similar to ABCG37: ABC transporter G family member 37 (Oryza sativa subsp. japonica OX%3D39947);Dbxref=Gene3D:G3DSA:3.40.50.300,InterPro:IPR027417,PANTHER:PTHR19241,PANTHER:PTHR19241:SF444,SUPERFAMILY:SSF52540
chr10_pilon_pilon	maker	mRNA	3045195	3045407	.	-	.	ID=vitri10g01770-mRNA-1;Parent=vitri10g01770;Name=vitri10g01770-mRNA-1;_AED=0.35;_eAED=0.35;_QI=0|-1|0|1|-1|1|1|0|70;Note=Similar to ABCG37: ABC transporter G family member 37 (Oryza sativa subsp. japonica OX%3D39947);Dbxref=Gene3D:G3DSA:3.40.50.300,InterPro:IPR027417,PANTHER:PTHR19241,PANTHER:PTHR19241:SF444,SUPERFAMILY:SSF52540
chr10_pilon_pilon	maker	exon	3045195	3045407	.	-	.	ID=vitri10g01770-mRNA-1:exon:761;Parent=vitri10g01770-mRNA-1
chr10_pilon_pilon	maker	CDS	3045195	3045407	.	-	0	ID=vitri10g01770-mRNA-1:cds;Parent=vitri10g01770-mRNA-1
###
chr10_pilon_pilon	maker	gene	3078112	3079211	.	-	.	ID=vitri10g01780;Name=vitri10g01780;Note=Protein of unknown function
chr10_pilon_pilon	maker	mRNA	3078112	3079211	.	-	.	ID=vitri10g01780-mRNA-1;Parent=vitri10g01780;Name=vitri10g01780-mRNA-1;_AED=0.40;_eAED=0.62;_QI=0|0|0|1|0|0|3|0|105;Note=Protein of unknown function
chr10_pilon_pilon	maker	exon	3078112	3078227	.	-	.	ID=vitri10g01780-mRNA-1:exon:767;Parent=vitri10g01780-mRNA-1
chr10_pilon_pilon	maker	CDS	3078112	3078227	.	-	2	ID=vitri10g01780-mRNA-1:cds;Parent=vitri10g01780-mRNA-1
chr10_pilon_pilon	maker	exon	3078527	3078632	.	-	.	ID=vitri10g01780-mRNA-1:exon:768;Parent=vitri10g01780-mRNA-1
chr10_pilon_pilon	maker	CDS	3078527	3078632	.	-	0	ID=vitri10g01780-mRNA-1:cds;Parent=vitri10g01780-mRNA-1
chr10_pilon_pilon	maker	exon	3079119	3079211	.	-	.	ID=vitri10g01780-mRNA-1:exon:769;Parent=vitri10g01780-mRNA-1
chr10_pilon_pilon	maker	CDS	3079119	3079211	.	-	0	ID=vitri10g01780-mRNA-1:cds;Parent=vitri10g01780-mRNA-1
###
chr10_pilon_pilon	maker	gene	3081411	3083114	.	-	.	ID=vitri10g01790;Name=vitri10g01790;Note=Protein of unknown function;Dbxref=Gene3D:G3DSA:3.80.10.10,InterPro:IPR032675,PANTHER:PTHR33463,SUPERFAMILY:SSF52047
chr10_pilon_pilon	maker	mRNA	3081411	3083114	.	-	.	ID=vitri10g01790-mRNA-1;Parent=vitri10g01790;Name=vitri10g01790-mRNA-1;_AED=0.16;_eAED=0.16;_QI=0|0|0|1|0|0|3|0|213;Note=Protein of unknown function;Dbxref=Gene3D:G3DSA:3.80.10.10,InterPro:IPR032675,PANTHER:PTHR33463,SUPERFAMILY:SSF52047
chr10_pilon_pilon	maker	exon	3081411	3081521	.	-	.	ID=vitri10g01790-mRNA-1:exon:762;Parent=vitri10g01790-mRNA-1
chr10_pilon_pilon	maker	CDS	3081411	3081521	.	-	0	ID=vitri10g01790-mRNA-1:cds;Parent=vitri10g01790-mRNA-1
chr10_pilon_pilon	maker	exon	3081555	3082060	.	-	.	ID=vitri10g01790-mRNA-1:exon:763;Parent=vitri10g01790-mRNA-1
chr10_pilon_pilon	maker	CDS	3081555	3082060	.	-	2	ID=vitri10g01790-mRNA-1:cds;Parent=vitri10g01790-mRNA-1
chr10_pilon_pilon	maker	exon	3083090	3083114	.	-	.	ID=vitri10g01790-mRNA-1:exon:764;Parent=vitri10g01790-mRNA-1
chr10_pilon_pilon	maker	CDS	3083090	3083114	.	-	0	ID=vitri10g01790-mRNA-1:cds;Parent=vitri10g01790-mRNA-1
###
chr10_pilon_pilon	maker	gene	3101006	3103935	.	-	.	ID=vitri10g01800;Name=vitri10g01800;Note=Protein of unknown function;Dbxref=Gene3D:G3DSA:3.80.10.10,InterPro:IPR032675,PANTHER:PTHR33463,PANTHER:PTHR33463:SF5,SUPERFAMILY:SSF52058
chr10_pilon_pilon	maker	mRNA	3101006	3103935	.	-	.	ID=vitri10g01800-mRNA-1;Parent=vitri10g01800;Name=vitri10g01800-mRNA-1;_AED=0.40;_eAED=0.51;_QI=0|0|0|1|0|0|3|0|335;Note=Protein of unknown function;Dbxref=Gene3D:G3DSA:3.80.10.10,InterPro:IPR032675,PANTHER:PTHR33463,PANTHER:PTHR33463:SF5,SUPERFAMILY:SSF52058
chr10_pilon_pilon	maker	exon	3101006	3101339	.	-	.	ID=vitri10g01800-mRNA-1:exon:501;Parent=vitri10g01800-mRNA-1
chr10_pilon_pilon	maker	CDS	3101006	3101339	.	-	1	ID=vitri10g01800-mRNA-1:cds;Parent=vitri10g01800-mRNA-1
chr10_pilon_pilon	maker	exon	3102790	3103279	.	-	.	ID=vitri10g01800-mRNA-1:exon:502;Parent=vitri10g01800-mRNA-1
chr10_pilon_pilon	maker	CDS	3102790	3103279	.	-	2	ID=vitri10g01800-mRNA-1:cds;Parent=vitri10g01800-mRNA-1
chr10_pilon_pilon	maker	exon	3103752	3103935	.	-	.	ID=vitri10g01800-mRNA-1:exon:503;Parent=vitri10g01800-mRNA-1
chr10_pilon_pilon	maker	CDS	3103752	3103935	.	-	0	ID=vitri10g01800-mRNA-1:cds;Parent=vitri10g01800-mRNA-1
###
chr10_pilon_pilon	maker	gene	3103962	3104796	.	-	.	ID=vitri10g01810;Name=vitri10g01810;Note=Protein of unknown function;Dbxref=Gene3D:G3DSA:3.80.10.10,InterPro:IPR032675,PANTHER:PTHR44061,PANTHER:PTHR44061:SF1,SUPERFAMILY:SSF52058
chr10_pilon_pilon	maker	mRNA	3103962	3104796	.	-	.	ID=vitri10g01810-mRNA-1;Parent=vitri10g01810;Name=vitri10g01810-mRNA-1;_AED=0.44;_eAED=0.52;_QI=0|0|0|1|0|0|4|0|199;Note=Protein of unknown function;Dbxref=Gene3D:G3DSA:3.80.10.10,InterPro:IPR032675,PANTHER:PTHR44061,PANTHER:PTHR44061:SF1,SUPERFAMILY:SSF52058
chr10_pilon_pilon	maker	exon	3103962	3104039	.	-	.	ID=vitri10g01810-mRNA-1:exon:508;Parent=vitri10g01810-mRNA-1
chr10_pilon_pilon	maker	CDS	3103962	3104039	.	-	0	ID=vitri10g01810-mRNA-1:cds;Parent=vitri10g01810-mRNA-1
chr10_pilon_pilon	maker	exon	3104097	3104272	.	-	.	ID=vitri10g01810-mRNA-1:exon:509;Parent=vitri10g01810-mRNA-1
chr10_pilon_pilon	maker	CDS	3104097	3104272	.	-	2	ID=vitri10g01810-mRNA-1:cds;Parent=vitri10g01810-mRNA-1
chr10_pilon_pilon	maker	exon	3104293	3104426	.	-	.	ID=vitri10g01810-mRNA-1:exon:510;Parent=vitri10g01810-mRNA-1
chr10_pilon_pilon	maker	CDS	3104293	3104426	.	-	1	ID=vitri10g01810-mRNA-1:cds;Parent=vitri10g01810-mRNA-1
chr10_pilon_pilon	maker	exon	3104585	3104796	.	-	.	ID=vitri10g01810-mRNA-1:exon:511;Parent=vitri10g01810-mRNA-1
chr10_pilon_pilon	maker	CDS	3104585	3104796	.	-	0	ID=vitri10g01810-mRNA-1:cds;Parent=vitri10g01810-mRNA-1
###
chr10_pilon_pilon	maker	gene	3104818	3114390	.	-	.	ID=vitri10g01820;Name=vitri10g01820;Note=Protein of unknown function;Dbxref=CDD:cd00009,Gene3D:G3DSA:3.40.50.300,InterPro:IPR002182,InterPro:IPR027417,PANTHER:PTHR44061,PANTHER:PTHR44061:SF1,PRINTS:PR00364,Pfam:PF00931,SUPERFAMILY:SSF52540;Ontology_term=GO:0043531
chr10_pilon_pilon	maker	mRNA	3104818	3114390	.	-	.	ID=vitri10g01820-mRNA-1;Parent=vitri10g01820;Name=vitri10g01820-mRNA-1;_AED=0.40;_eAED=0.45;_QI=0|0|0|1|0|0|6|0|366;Note=Protein of unknown function;Dbxref=CDD:cd00009,Gene3D:G3DSA:3.40.50.300,InterPro:IPR002182,InterPro:IPR027417,PANTHER:PTHR44061,PANTHER:PTHR44061:SF1,PRINTS:PR00364,Pfam:PF00931,SUPERFAMILY:SSF52540;Ontology_term=GO:0043531
chr10_pilon_pilon	maker	exon	3104818	3104853	.	-	.	ID=vitri10g01820-mRNA-1:exon:495;Parent=vitri10g01820-mRNA-1
chr10_pilon_pilon	maker	CDS	3104818	3104853	.	-	0	ID=vitri10g01820-mRNA-1:cds;Parent=vitri10g01820-mRNA-1
chr10_pilon_pilon	maker	exon	3108651	3108838	.	-	.	ID=vitri10g01820-mRNA-1:exon:496;Parent=vitri10g01820-mRNA-1
chr10_pilon_pilon	maker	CDS	3108651	3108838	.	-	2	ID=vitri10g01820-mRNA-1:cds;Parent=vitri10g01820-mRNA-1
chr10_pilon_pilon	maker	exon	3113366	3113459	.	-	.	ID=vitri10g01820-mRNA-1:exon:497;Parent=vitri10g01820-mRNA-1
chr10_pilon_pilon	maker	CDS	3113366	3113459	.	-	0	ID=vitri10g01820-mRNA-1:cds;Parent=vitri10g01820-mRNA-1
chr10_pilon_pilon	maker	exon	3113485	3113749	.	-	.	ID=vitri10g01820-mRNA-1:exon:498;Parent=vitri10g01820-mRNA-1
chr10_pilon_pilon	maker	CDS	3113485	3113749	.	-	1	ID=vitri10g01820-mRNA-1:cds;Parent=vitri10g01820-mRNA-1
chr10_pilon_pilon	maker	exon	3113770	3113857	.	-	.	ID=vitri10g01820-mRNA-1:exon:499;Parent=vitri10g01820-mRNA-1
chr10_pilon_pilon	maker	CDS	3113770	3113857	.	-	2	ID=vitri10g01820-mRNA-1:cds;Parent=vitri10g01820-mRNA-1
chr10_pilon_pilon	maker	exon	3113961	3114390	.	-	.	ID=vitri10g01820-mRNA-1:exon:500;Parent=vitri10g01820-mRNA-1
chr10_pilon_pilon	maker	CDS	3113961	3114390	.	-	0	ID=vitri10g01820-mRNA-1:cds;Parent=vitri10g01820-mRNA-1
###
chr10_pilon_pilon	maker	gene	3114418	3114750	.	-	.	ID=vitri10g01830;Name=vitri10g01830;Note=Protein of unknown function
chr10_pilon_pilon	maker	mRNA	3114418	3114750	.	-	.	ID=vitri10g01830-mRNA-1;Parent=vitri10g01830;Name=vitri10g01830-mRNA-1;_AED=0.47;_eAED=0.47;_QI=0|0|0|1|0|0|2|0|96;Note=Protein of unknown function
chr10_pilon_pilon	maker	exon	3114418	3114611	.	-	.	ID=vitri10g01830-mRNA-1:exon:512;Parent=vitri10g01830-mRNA-1
chr10_pilon_pilon	maker	CDS	3114418	3114611	.	-	2	ID=vitri10g01830-mRNA-1:cds;Parent=vitri10g01830-mRNA-1
chr10_pilon_pilon	maker	exon	3114654	3114750	.	-	.	ID=vitri10g01830-mRNA-1:exon:513;Parent=vitri10g01830-mRNA-1
chr10_pilon_pilon	maker	CDS	3114654	3114750	.	-	0	ID=vitri10g01830-mRNA-1:cds;Parent=vitri10g01830-mRNA-1
###
chr10_pilon_pilon	maker	gene	3129597	3139454	.	-	.	ID=vitri10g01840;Name=vitri10g01840;Note=Protein of unknown function
chr10_pilon_pilon	maker	mRNA	3129597	3139454	.	-	.	ID=vitri10g01840-mRNA-1;Parent=vitri10g01840;Name=vitri10g01840-mRNA-1;_AED=0.45;_eAED=0.46;_QI=0|0|0|1|0|0|3|0|94;Note=Protein of unknown function
chr10_pilon_pilon	maker	exon	3129597	3129668	.	-	.	ID=vitri10g01840-mRNA-1:exon:514;Parent=vitri10g01840-mRNA-1
chr10_pilon_pilon	maker	CDS	3129597	3129668	.	-	0	ID=vitri10g01840-mRNA-1:cds;Parent=vitri10g01840-mRNA-1
chr10_pilon_pilon	maker	exon	3130237	3130343	.	-	.	ID=vitri10g01840-mRNA-1:exon:515;Parent=vitri10g01840-mRNA-1
chr10_pilon_pilon	maker	CDS	3130237	3130343	.	-	2	ID=vitri10g01840-mRNA-1:cds;Parent=vitri10g01840-mRNA-1
chr10_pilon_pilon	maker	exon	3139349	3139454	.	-	.	ID=vitri10g01840-mRNA-1:exon:516;Parent=vitri10g01840-mRNA-1
chr10_pilon_pilon	maker	CDS	3139349	3139454	.	-	0	ID=vitri10g01840-mRNA-1:cds;Parent=vitri10g01840-mRNA-1
###
chr10_pilon_pilon	maker	gene	3142806	3143036	.	-	.	ID=vitri10g01850;Name=vitri10g01850;Note=Protein of unknown function;Dbxref=MobiDBLite:mobidb-lite
chr10_pilon_pilon	maker	mRNA	3142806	3143036	.	-	.	ID=vitri10g01850-mRNA-1;Parent=vitri10g01850;Name=vitri10g01850-mRNA-1;_AED=0.10;_eAED=0.10;_QI=0|-1|0|1|-1|1|1|0|76;Note=Protein of unknown function;Dbxref=MobiDBLite:mobidb-lite
chr10_pilon_pilon	maker	exon	3142806	3143036	.	-	.	ID=vitri10g01850-mRNA-1:exon:492;Parent=vitri10g01850-mRNA-1
chr10_pilon_pilon	maker	CDS	3142806	3143036	.	-	0	ID=vitri10g01850-mRNA-1:cds;Parent=vitri10g01850-mRNA-1
###
chr10_pilon_pilon	maker	gene	3169711	3170151	.	-	.	ID=vitri10g01860;Name=vitri10g01860;Note=Protein of unknown function;Dbxref=Gene3D:G3DSA:1.25.40.10,InterPro:IPR002885,InterPro:IPR011990,PANTHER:PTHR24015,PANTHER:PTHR24015:SF909,Pfam:PF01535,ProSiteProfiles:PS51375,TIGRFAM:TIGR00756;Ontology_term=GO:0005515
chr10_pilon_pilon	maker	mRNA	3169711	3170151	.	-	.	ID=vitri10g01860-mRNA-1;Parent=vitri10g01860;Name=vitri10g01860-mRNA-1;_AED=0.39;_eAED=0.39;_QI=0|0|0|1|1|1|2|0|128;Note=Protein of unknown function;Dbxref=Gene3D:G3DSA:1.25.40.10,InterPro:IPR002885,InterPro:IPR011990,PANTHER:PTHR24015,PANTHER:PTHR24015:SF909,Pfam:PF01535,ProSiteProfiles:PS51375,TIGRFAM:TIGR00756;Ontology_term=GO:0005515
chr10_pilon_pilon	maker	exon	3169711	3169996	.	-	.	ID=vitri10g01860-mRNA-1:exon:493;Parent=vitri10g01860-mRNA-1
chr10_pilon_pilon	maker	CDS	3169711	3169996	.	-	1	ID=vitri10g01860-mRNA-1:cds;Parent=vitri10g01860-mRNA-1
chr10_pilon_pilon	maker	exon	3170051	3170151	.	-	.	ID=vitri10g01860-mRNA-1:exon:494;Parent=vitri10g01860-mRNA-1
chr10_pilon_pilon	maker	CDS	3170051	3170151	.	-	0	ID=vitri10g01860-mRNA-1:cds;Parent=vitri10g01860-mRNA-1
###
chr10_pilon_pilon	maker	gene	3170164	3171305	.	-	.	ID=vitri10g01870;Name=vitri10g01870;Note=Similar to IRL6: Plant intracellular Ras-group-related LRR protein 6 (Oryza sativa subsp. japonica OX%3D39947);Dbxref=Gene3D:G3DSA:1.25.40.10,Gene3D:G3DSA:3.80.10.10,InterPro:IPR002885,InterPro:IPR011990,InterPro:IPR032675,PANTHER:PTHR24015,PANTHER:PTHR24015:SF909,Pfam:PF01535,SUPERFAMILY:SSF52058;Ontology_term=GO:0005515
chr10_pilon_pilon	maker	mRNA	3170164	3171305	.	-	.	ID=vitri10g01870-mRNA-1;Parent=vitri10g01870;Name=vitri10g01870-mRNA-1;_AED=0.33;_eAED=0.33;_QI=0|0|0|1|0|0|4|0|202;Note=Similar to IRL6: Plant intracellular Ras-group-related LRR protein 6 (Oryza sativa subsp. japonica OX%3D39947);Dbxref=Gene3D:G3DSA:1.25.40.10,Gene3D:G3DSA:3.80.10.10,InterPro:IPR002885,InterPro:IPR011990,InterPro:IPR032675,PANTHER:PTHR24015,PANTHER:PTHR24015:SF909,Pfam:PF01535,SUPERFAMILY:SSF52058;Ontology_term=GO:0005515
chr10_pilon_pilon	maker	exon	3170164	3170336	.	-	.	ID=vitri10g01870-mRNA-1:exon:504;Parent=vitri10g01870-mRNA-1
chr10_pilon_pilon	maker	CDS	3170164	3170336	.	-	2	ID=vitri10g01870-mRNA-1:cds;Parent=vitri10g01870-mRNA-1
chr10_pilon_pilon	maker	exon	3170666	3170725	.	-	.	ID=vitri10g01870-mRNA-1:exon:505;Parent=vitri10g01870-mRNA-1
chr10_pilon_pilon	maker	CDS	3170666	3170725	.	-	2	ID=vitri10g01870-mRNA-1:cds;Parent=vitri10g01870-mRNA-1
chr10_pilon_pilon	maker	exon	3170870	3170983	.	-	.	ID=vitri10g01870-mRNA-1:exon:506;Parent=vitri10g01870-mRNA-1
chr10_pilon_pilon	maker	CDS	3170870	3170983	.	-	2	ID=vitri10g01870-mRNA-1:cds;Parent=vitri10g01870-mRNA-1
chr10_pilon_pilon	maker	exon	3171044	3171305	.	-	.	ID=vitri10g01870-mRNA-1:exon:507;Parent=vitri10g01870-mRNA-1
chr10_pilon_pilon	maker	CDS	3171044	3171305	.	-	0	ID=vitri10g01870-mRNA-1:cds;Parent=vitri10g01870-mRNA-1
###
chr10_pilon_pilon	maker	gene	3197208	3198562	.	-	.	ID=vitri10g01880;Name=vitri10g01880;Note=Protein of unknown function
chr10_pilon_pilon	maker	mRNA	3197208	3198562	.	-	.	ID=vitri10g01880-mRNA-1;Parent=vitri10g01880;Name=vitri10g01880-mRNA-1;_AED=0.15;_eAED=0.46;_QI=0|0|0|1|0|0|3|0|110;Note=Protein of unknown function
chr10_pilon_pilon	maker	exon	3197208	3197329	.	-	.	ID=vitri10g01880-mRNA-1:exon:66;Parent=vitri10g01880-mRNA-1
chr10_pilon_pilon	maker	CDS	3197208	3197329	.	-	2	ID=vitri10g01880-mRNA-1:cds;Parent=vitri10g01880-mRNA-1
chr10_pilon_pilon	maker	exon	3197644	3197725	.	-	.	ID=vitri10g01880-mRNA-1:exon:67;Parent=vitri10g01880-mRNA-1
chr10_pilon_pilon	maker	CDS	3197644	3197725	.	-	0	ID=vitri10g01880-mRNA-1:cds;Parent=vitri10g01880-mRNA-1
chr10_pilon_pilon	maker	exon	3198434	3198562	.	-	.	ID=vitri10g01880-mRNA-1:exon:68;Parent=vitri10g01880-mRNA-1
chr10_pilon_pilon	maker	CDS	3198434	3198562	.	-	0	ID=vitri10g01880-mRNA-1:cds;Parent=vitri10g01880-mRNA-1
###
chr10_pilon_pilon	maker	gene	3201996	3205569	.	-	.	ID=vitri10g01890;Name=vitri10g01890;Note=Protein of unknown function;Dbxref=Gene3D:G3DSA:3.80.10.10,InterPro:IPR032675,PANTHER:PTHR45142,SUPERFAMILY:SSF52058
chr10_pilon_pilon	maker	mRNA	3201996	3205569	.	-	.	ID=vitri10g01890-mRNA-1;Parent=vitri10g01890;Name=vitri10g01890-mRNA-1;_AED=0.36;_eAED=0.43;_QI=0|0|0|1|0|0|5|0|530;Note=Protein of unknown function;Dbxref=Gene3D:G3DSA:3.80.10.10,InterPro:IPR032675,PANTHER:PTHR45142,SUPERFAMILY:SSF52058
chr10_pilon_pilon	maker	exon	3201996	3202157	.	-	.	ID=vitri10g01890-mRNA-1:exon:50;Parent=vitri10g01890-mRNA-1
chr10_pilon_pilon	maker	CDS	3201996	3202157	.	-	0	ID=vitri10g01890-mRNA-1:cds;Parent=vitri10g01890-mRNA-1
chr10_pilon_pilon	maker	exon	3202236	3202402	.	-	.	ID=vitri10g01890-mRNA-1:exon:51;Parent=vitri10g01890-mRNA-1
chr10_pilon_pilon	maker	CDS	3202236	3202402	.	-	2	ID=vitri10g01890-mRNA-1:cds;Parent=vitri10g01890-mRNA-1
chr10_pilon_pilon	maker	exon	3203919	3204537	.	-	.	ID=vitri10g01890-mRNA-1:exon:52;Parent=vitri10g01890-mRNA-1
chr10_pilon_pilon	maker	CDS	3203919	3204537	.	-	0	ID=vitri10g01890-mRNA-1:cds;Parent=vitri10g01890-mRNA-1
chr10_pilon_pilon	maker	exon	3204828	3205135	.	-	.	ID=vitri10g01890-mRNA-1:exon:53;Parent=vitri10g01890-mRNA-1
chr10_pilon_pilon	maker	CDS	3204828	3205135	.	-	2	ID=vitri10g01890-mRNA-1:cds;Parent=vitri10g01890-mRNA-1
chr10_pilon_pilon	maker	exon	3205233	3205569	.	-	.	ID=vitri10g01890-mRNA-1:exon:54;Parent=vitri10g01890-mRNA-1
chr10_pilon_pilon	maker	CDS	3205233	3205569	.	-	0	ID=vitri10g01890-mRNA-1:cds;Parent=vitri10g01890-mRNA-1
###
chr10_pilon_pilon	maker	gene	3205585	3210766	.	-	.	ID=vitri10g01900;Name=vitri10g01900;Note=Protein of unknown function;Dbxref=Gene3D:G3DSA:3.80.10.10,InterPro:IPR032675,MobiDBLite:mobidb-lite,PANTHER:PTHR44061,PANTHER:PTHR44061:SF1,SUPERFAMILY:SSF52058
[truncated: 91,785,733 more chars]
